# Supplementary material
Source: MDPI journal article supplement (https://www.mdpi.com/2073-4344/7/1/5)
Supplement: s1 [file s1]

# Supplementary Materials: Reaction Mechanisms of CO<sub>2</sub> Reduction to Formaldehyde Catalyzed by Hourglass Ru, Fe, and Os Complexes: A Density Functional Theory Study

Chunhua Dong, Mingsong Ji, Xinzheng Yang, Jiannian Yao and Hui Chen

**Table S1.** Solvent effect corrected absolute free energies, electronic energies (Hartree) and Cartesian coordinates (Å) of all optimized structures.

| Ru-1cyp                                                               |             |             |             |
|-----------------------------------------------------------------------|-------------|-------------|-------------|
| $G_{\text{solv}} = -1955.921603$ ; $E_{\text{solv}} = -1956.70639802$ |             |             |             |
| C                                                                     | 11.07314000 | 4.92736400  | 8.15168400  |
| H                                                                     | 11.15644800 | 5.32178000  | 9.17175300  |
| C                                                                     | 10.92655900 | 3.37682200  | 8.23346500  |
| H                                                                     | 11.67245900 | 2.85101200  | 7.63151100  |
| H                                                                     | 11.06414200 | 3.04799700  | 9.26880400  |
| C                                                                     | 9.49828900  | 3.05918400  | 7.74773000  |
| H                                                                     | 9.51469200  | 2.82560600  | 6.67517400  |
| H                                                                     | 9.05967400  | 2.20009100  | 8.26551600  |
| C                                                                     | 8.72310400  | 4.36112900  | 7.96508300  |
| H                                                                     | 8.46832600  | 4.47994400  | 9.02666400  |
| H                                                                     | 7.79266900  | 4.41145600  | 7.38998900  |
| C                                                                     | 9.74245200  | 5.42284900  | 7.54508200  |
| H                                                                     | 9.48373700  | 6.43505500  | 7.87380500  |
| H                                                                     | 9.80656800  | 5.43359200  | 6.44914800  |
| C                                                                     | 13.94326200 | 5.13831600  | 8.42515200  |
| H                                                                     | 13.65536400 | 5.61035900  | 9.37343100  |
| C                                                                     | 14.20778900 | 3.64215200  | 8.69561600  |
| H                                                                     | 13.54296600 | 3.23248000  | 9.46244200  |
| H                                                                     | 14.06555700 | 3.06121100  | 7.77623800  |
| C                                                                     | 15.68646700 | 3.59769000  | 9.09274400  |
| H                                                                     | 15.81295100 | 3.96304200  | 10.12081200 |
| H                                                                     | 16.11021500 | 2.58894400  | 9.04328000  |
| C                                                                     | 16.32974000 | 4.56971500  | 8.09995900  |
| H                                                                     | 16.44275400 | 4.06892100  | 7.13043500  |
| H                                                                     | 17.32060400 | 4.91592500  | 8.41196600  |
| C                                                                     | 15.31285400 | 5.72051600  | 7.96285100  |
| H                                                                     | 15.27535400 | 6.07807300  | 6.92926500  |
| H                                                                     | 15.59045100 | 6.57031400  | 8.59651100  |
| C                                                                     | 12.52067200 | 7.34934700  | 7.33568100  |
| H                                                                     | 13.54550800 | 7.63678400  | 7.06892500  |
| C                                                                     | 12.20559500 | 7.98444000  | 8.70323800  |
| H                                                                     | 11.33136700 | 7.51161200  | 9.16904300  |
| H                                                                     | 13.04033500 | 7.90569400  | 9.40737600  |
| C                                                                     | 11.86018000 | 9.43109900  | 8.33829800  |
| H                                                                     | 11.36077000 | 9.97287400  | 9.14840000  |
| H                                                                     | 12.77916400 | 9.97749600  | 8.08890500  |
| C                                                                     | 10.98226400 | 9.27265400  | 7.08991900  |
| H                                                                     | 10.94991900 | 10.17841000 | 6.47641900  |
| H                                                                     | 9.95179200  | 9.05565200  | 7.39843200  |
| C                                                                     | 11.57049600 | 8.06018400  | 6.32977900  |
| H                                                                     | 12.13395200 | 8.36500700  | 5.44319000  |
| H                                                                     | 10.77182700 | 7.40489000  | 5.97390900  |
| C                                                                     | 13.29995100 | 4.66586100  | 1.49983200  |

|                                                                    |             |             |             |
|--------------------------------------------------------------------|-------------|-------------|-------------|
| H                                                                  | 13.87690300 | 4.19858100  | 0.69135800  |
| C                                                                  | 13.49676000 | 6.19336000  | 1.41384100  |
| H                                                                  | 14.50975600 | 6.46620900  | 1.10284200  |
| H                                                                  | 13.31255900 | 6.65436400  | 2.39263400  |
| C                                                                  | 12.41911300 | 6.64430900  | 0.42387800  |
| H                                                                  | 12.23345500 | 7.72300000  | 0.45623900  |
| H                                                                  | 12.71804200 | 6.38750000  | −0.60122800 |
| C                                                                  | 11.20304000 | 5.81365100  | 0.84540900  |
| H                                                                  | 10.73652700 | 6.27944500  | 1.72294800  |
| H                                                                  | 10.43665500 | 5.74341700  | 0.06674200  |
| C                                                                  | 11.78273000 | 4.43629700  | 1.23430700  |
| H                                                                  | 11.65066900 | 3.70750000  | 0.42736700  |
| H                                                                  | 11.26484000 | 4.03566400  | 2.11325100  |
| C                                                                  | 13.54257800 | 2.10556500  | 2.72832700  |
| H                                                                  | 12.46263600 | 2.09425600  | 2.53376900  |
| C                                                                  | 13.81264100 | 1.12151600  | 3.90846500  |
| H                                                                  | 14.40948300 | 1.57080100  | 4.70512200  |
| H                                                                  | 12.86167900 | 0.82884200  | 4.36580900  |
| C                                                                  | 14.51896900 | −0.10046200 | 3.28471800  |
| H                                                                  | 15.60508500 | −0.01335100 | 3.41429800  |
| H                                                                  | 14.21331500 | −1.04382900 | 3.74804300  |
| C                                                                  | 14.18060200 | −0.02757500 | 1.79181100  |
| H                                                                  | 13.16359300 | −0.40250500 | 1.61619400  |
| H                                                                  | 14.86325000 | −0.61133400 | 1.16536800  |
| C                                                                  | 14.23699800 | 1.47568700  | 1.50240200  |
| H                                                                  | 13.75095300 | 1.75203800  | 0.56084300  |
| H                                                                  | 15.28655700 | 1.78767300  | 1.43665800  |
| C                                                                  | 15.72232700 | 4.06980500  | 2.93686800  |
| H                                                                  | 15.96878600 | 3.78589100  | 1.90651600  |
| C                                                                  | 16.25520800 | 5.51380500  | 3.18753200  |
| H                                                                  | 16.67766600 | 5.91419200  | 2.25898500  |
| H                                                                  | 15.46874800 | 6.19710400  | 3.51528500  |
| C                                                                  | 17.34776900 | 5.37518900  | 4.26298600  |
| H                                                                  | 18.14610900 | 6.11632100  | 4.15077800  |
| H                                                                  | 16.90098300 | 5.51188000  | 5.25502600  |
| C                                                                  | 17.83479400 | 3.93106000  | 4.12569000  |
| H                                                                  | 18.38589600 | 3.57513200  | 5.00281900  |
| H                                                                  | 18.49455100 | 3.83243000  | 3.25296900  |
| C                                                                  | 16.52865300 | 3.16597600  | 3.89579000  |
| H                                                                  | 16.00532900 | 3.07337400  | 4.85419900  |
| H                                                                  | 16.67565600 | 2.15853400  | 3.49233900  |
| P                                                                  | 12.57785600 | 5.49487500  | 7.21824400  |
| P                                                                  | 13.87706900 | 3.90104200  | 3.09155600  |
| Ru                                                                 | 12.91477100 | 4.68263100  | 5.06008200  |
| H                                                                  | 14.29814200 | 4.12348200  | 5.67604200  |
| H                                                                  | 13.77793900 | 6.04346200  | 4.86138400  |
| H                                                                  | 11.76714900 | 5.40373100  | 3.97299700  |
| H                                                                  | 11.48750500 | 5.63124200  | 4.76823400  |
| H                                                                  | 11.77908900 | 3.35989200  | 5.11573500  |
| H                                                                  | 12.50139800 | 3.08667600  | 5.53665800  |
| <b>H<sub>2</sub></b>                                               |             |             |             |
| $G_{\text{solv}} = -1.176234; E_{\text{solv}} = -1.17487290$       |             |             |             |
| H                                                                  | −0.55660100 | 0.40462400  | 0.00000000  |
| H                                                                  | −1.30004700 | 0.40462400  | 0.00000000  |
| <b>1Ru</b>                                                         |             |             |             |
| $G_{\text{solv}} = -1954.728561; E_{\text{solv}} = -1955.49581633$ |             |             |             |
| C                                                                  | 11.18942800 | 4.83258200  | 8.16025100  |
| H                                                                  | 11.14421400 | 5.29312000  | 9.15555800  |

|   |             |             |             |
|---|-------------|-------------|-------------|
| C | 11.20464900 | 3.28218500  | 8.32792700  |
| H | 12.00718300 | 2.81233700  | 7.75137200  |
| H | 11.37076600 | 3.02176100  | 9.37810600  |
| C | 9.82302500  | 2.78590500  | 7.84797700  |
| H | 9.89552200  | 2.43492700  | 6.81073100  |
| H | 9.44370000  | 1.95328200  | 8.44878500  |
| C | 8.92390200  | 4.02474000  | 7.89675900  |
| H | 8.59840000  | 4.22020400  | 8.92710100  |
| H | 8.02722600  | 3.93102500  | 7.27509700  |
| C | 9.86641200  | 5.13428200  | 7.42547100  |
| H | 9.49294900  | 6.14364500  | 7.62689100  |
| H | 10.00761800 | 5.04118800  | 6.34035700  |
| C | 13.98969700 | 5.40385300  | 8.60671900  |
| H | 13.57565400 | 5.91269400  | 9.48663800  |
| C | 14.37805200 | 3.96060100  | 9.00677900  |
| H | 13.74062000 | 3.56402300  | 9.80314800  |
| H | 14.28919900 | 3.29305100  | 8.14147000  |
| C | 15.85379900 | 4.06106500  | 9.40522800  |
| H | 15.94924500 | 4.50170100  | 10.40690100 |
| H | 16.35602000 | 3.08775000  | 9.41860600  |
| C | 16.41495700 | 5.01753300  | 8.35127800  |
| H | 16.52679600 | 4.48076500  | 7.40095100  |
| H | 17.39099200 | 5.43679400  | 8.61691900  |
| C | 15.32678900 | 6.09490600  | 8.20128600  |
| H | 15.30473100 | 6.48255700  | 7.17857400  |
| H | 15.52258400 | 6.93961600  | 8.87213600  |
| C | 12.40344700 | 7.33322800  | 7.20185100  |
| H | 13.41302400 | 7.73321600  | 7.04876500  |
| C | 11.80041600 | 8.05825700  | 8.41960900  |
| H | 10.96181400 | 7.49454700  | 8.84664100  |
| H | 12.53443700 | 8.21295300  | 9.21732400  |
| C | 11.27538800 | 9.36704200  | 7.81962300  |
| H | 10.57699400 | 9.89301500  | 8.47900500  |
| H | 12.11531000 | 10.04393700 | 7.61561400  |
| C | 10.63027600 | 8.91415900  | 6.50292000  |
| H | 10.51999700 | 9.72924200  | 5.78087700  |
| H | 9.62499100  | 8.52470400  | 6.70672100  |
| C | 11.54124000 | 7.77843500  | 5.98273800  |
| H | 12.19492600 | 8.12827800  | 5.17642600  |
| H | 10.94548800 | 6.95799900  | 5.56884300  |
| C | 13.34594400 | 4.86278900  | 1.67517200  |
| H | 13.78552900 | 4.43035200  | 0.76739900  |
| C | 13.70383500 | 6.36526900  | 1.72601100  |
| H | 14.69476400 | 6.57249100  | 1.31200900  |
| H | 13.70151200 | 6.72281100  | 2.76478000  |
| C | 12.56993800 | 7.04448800  | 0.95416300  |
| H | 12.51858100 | 8.12396300  | 1.13146600  |
| H | 12.70234200 | 6.88810500  | −0.12470400 |
| C | 11.33181700 | 6.29304300  | 1.44879900  |
| H | 11.05369900 | 6.67139800  | 2.44126600  |
| H | 10.46015200 | 6.41491100  | 0.79790900  |
| C | 11.78998400 | 4.82358500  | 1.55887800  |
| H | 11.49570400 | 4.25341200  | 0.67101100  |
| H | 11.31968800 | 4.33584800  | 2.42038500  |
| C | 13.41110500 | 2.17569500  | 2.65742900  |
| H | 12.33114400 | 2.29686400  | 2.50502200  |
| C | 13.60425200 | 1.09415500  | 3.76397400  |
| H | 14.30813300 | 1.40746700  | 4.53813000  |

|                                                                       |             |             |            |
|-----------------------------------------------------------------------|-------------|-------------|------------|
| H                                                                     | 12.65185300 | 0.91451800  | 4.27380900 |
| C                                                                     | 14.09142300 | −0.17520800 | 3.03127000 |
| H                                                                     | 15.18148800 | −0.26402200 | 3.12100700 |
| H                                                                     | 13.65820100 | −1.09191500 | 3.44379300 |
| C                                                                     | 13.72391500 | 0.05169200  | 1.56001200 |
| H                                                                     | 12.65943000 | −0.16376600 | 1.39763100 |
| H                                                                     | 14.29907900 | −0.57566700 | 0.87090100 |
| C                                                                     | 13.98549500 | 1.54896100  | 1.37090900 |
| H                                                                     | 13.52606200 | 1.95766000  | 0.46461200 |
| H                                                                     | 15.06730400 | 1.71451200  | 1.29674600 |
| C                                                                     | 15.80052100 | 3.86040400  | 2.86133200 |
| H                                                                     | 15.96427600 | 3.56269800  | 1.81858200 |
| C                                                                     | 16.51106900 | 5.22716600  | 3.09660200 |
| H                                                                     | 16.88874000 | 5.61411000  | 2.14344700 |
| H                                                                     | 15.83817700 | 5.97835700  | 3.51609000 |
| C                                                                     | 17.67084000 | 4.93833300  | 4.06945200 |
| H                                                                     | 18.54866900 | 5.56354300  | 3.87509200 |
| H                                                                     | 17.33989100 | 5.13723200  | 5.09619600 |
| C                                                                     | 17.94643300 | 3.44095600  | 3.90953200 |
| H                                                                     | 18.50599500 | 3.01353200  | 4.74846600 |
| H                                                                     | 18.52141700 | 3.25370300  | 2.99233500 |
| C                                                                     | 16.53698500 | 2.85861600  | 3.77832200 |
| H                                                                     | 16.06632000 | 2.84214000  | 4.76868600 |
| H                                                                     | 16.52017600 | 1.83808700  | 3.38029000 |
| P                                                                     | 12.68886800 | 5.49817000  | 7.28515200 |
| P                                                                     | 13.96389100 | 3.88851900  | 3.13444500 |
| Ru                                                                    | 13.19126400 | 4.63947800  | 5.19362800 |
| H                                                                     | 14.15073000 | 3.60880300  | 5.85347200 |
| H                                                                     | 14.46179400 | 5.68462500  | 5.23116500 |
| H                                                                     | 11.72818300 | 3.72958600  | 4.99914400 |
| H                                                                     | 12.30201400 | 3.22834500  | 5.46916400 |
| <b>2Ru</b>                                                            |             |             |            |
| $G_{\text{solv}} = -2143.264129$ ; $E_{\text{solv}} = -2144.04734419$ |             |             |            |
| C                                                                     | −2.05990400 | −0.06004600 | 2.99291600 |
| H                                                                     | −1.96934400 | 0.24307200  | 4.04289200 |
| C                                                                     | −2.01720200 | −1.61897100 | 2.92360600 |
| H                                                                     | −1.27408300 | −1.98531300 | 2.20962300 |
| H                                                                     | −1.74474000 | −2.02500900 | 3.90280000 |
| C                                                                     | −3.43948100 | −2.06477400 | 2.52383000 |
| H                                                                     | −3.48917200 | −2.23154200 | 1.43954200 |
| H                                                                     | −3.73693600 | −2.99942400 | 3.00933000 |
| C                                                                     | −4.33484200 | −0.87889100 | 2.89242500 |
| H                                                                     | −4.52740300 | −0.86866900 | 3.97322700 |
| H                                                                     | −5.30237200 | −0.89295600 | 2.38042500 |
| C                                                                     | −3.47142100 | 0.32270600  | 2.50146600 |
| H                                                                     | −3.81724200 | 1.26908100  | 2.92755500 |
| H                                                                     | −3.48567900 | 0.42932100  | 1.40858900 |
| C                                                                     | 0.75731400  | 0.53482500  | 3.22170600 |
| H                                                                     | 0.44437100  | 0.97833100  | 4.17466000 |
| C                                                                     | 1.16658400  | −0.92965000 | 3.49545100 |
| H                                                                     | 0.58729300  | −1.37552400 | 4.31004500 |
| H                                                                     | 1.01705300  | −1.54567000 | 2.60169400 |
| C                                                                     | 2.66649200  | −0.84335500 | 3.79473600 |
| H                                                                     | 2.83107100  | −0.45670200 | 4.80936400 |
| H                                                                     | 3.16944200  | −1.81333200 | 3.72073700 |
| C                                                                     | 3.15046400  | 0.16887300  | 2.75490100 |
| H                                                                     | 3.19628200  | −0.32395200 | 1.77616400 |
| H                                                                     | 4.14332600  | 0.57764100  | 2.96802800 |

|   |             |             |             |
|---|-------------|-------------|-------------|
| C | 2.05445000  | 1.24968900  | 2.73388500  |
| H | 1.95028700  | 1.69084900  | 1.73736100  |
| H | 2.30424800  | 2.06571600  | 3.42128700  |
| C | -0.96316200 | 2.59655300  | 2.28777000  |
| H | -0.01605000 | 3.02857300  | 1.94295700  |
| C | -1.20947300 | 3.09801600  | 3.72891300  |
| H | -1.86583800 | 2.41453200  | 4.28309900  |
| H | -0.28045800 | 3.19914200  | 4.29881300  |
| C | -1.93412200 | 4.43221600  | 3.52576200  |
| H | -2.42930900 | 4.79140100  | 4.43395300  |
| H | -1.21632400 | 5.20016900  | 3.20935900  |
| C | -2.90791100 | 4.12226000  | 2.38549800  |
| H | -3.29016400 | 5.02037700  | 1.89052900  |
| H | -3.77387500 | 3.57940700  | 2.78627500  |
| C | -2.10524100 | 3.22099500  | 1.42669500  |
| H | -1.66396800 | 3.81153000  | 0.61938100  |
| H | -2.73730900 | 2.47496000  | 0.94159100  |
| C | 0.05146300  | -0.33349500 | -3.73576800 |
| H | 0.43556900  | -1.03534500 | -4.48743000 |
| C | 0.59517700  | 1.06428100  | -4.09521300 |
| H | 1.62693100  | 1.02584600  | -4.45636200 |
| H | 0.56842200  | 1.73748100  | -3.23361600 |
| C | -0.39444700 | 1.55675000  | -5.15501700 |
| H | -0.32324000 | 2.63443800  | -5.33257100 |
| H | -0.20367300 | 1.04675300  | -6.10906000 |
| C | -1.75304400 | 1.13363500  | -4.58552900 |
| H | -2.07292000 | 1.86503800  | -3.83613000 |
| H | -2.53518300 | 1.07307300  | -5.34917300 |
| C | -1.49300800 | -0.22605500 | -3.89705800 |
| H | -1.86892800 | -1.06085000 | -4.49882900 |
| H | -2.00645600 | -0.26544400 | -2.93035100 |
| C | -0.05412300 | -2.77332900 | -2.27937900 |
| H | -1.11683300 | -2.64154900 | -2.52657800 |
| C | 0.02462400  | -3.66072400 | -1.00169100 |
| H | 0.75917200  | -3.28953600 | -0.28430500 |
| H | -0.93883600 | -3.65384900 | -0.48171900 |
| C | 0.39700400  | -5.07894300 | -1.49406500 |
| H | 1.45823400  | -5.27408900 | -1.29581000 |
| H | -0.17431900 | -5.86282600 | -0.98740500 |
| C | 0.16137300  | -5.05481000 | -3.00926000 |
| H | -0.90258600 | -5.20932300 | -3.23191500 |
| H | 0.72755800  | -5.82425000 | -3.54392600 |
| C | 0.56822600  | -3.63118900 | -3.39884500 |
| H | 0.22161200  | -3.34275100 | -4.39625800 |
| H | 1.66282300  | -3.55474600 | -3.39095600 |
| C | 2.39197000  | -1.13212100 | -2.20520700 |
| H | 2.61660000  | -1.58944400 | -3.17700400 |
| C | 3.11587500  | 0.24626700  | -2.12642600 |
| H | 3.50848100  | 0.51388100  | -3.11242800 |
| H | 2.45118400  | 1.05476300  | -1.81407800 |
| C | 4.26062600  | 0.06699200  | -1.10778800 |
| H | 5.16763800  | 0.60499400  | -1.40079700 |
| H | 3.94759000  | 0.46226100  | -0.13477600 |
| C | 4.46792000  | -1.44704900 | -1.00458200 |
| H | 4.97594500  | -1.74934500 | -0.08264000 |
| H | 5.06790000  | -1.80890800 | -1.85023500 |
| C | 3.04079300  | -1.99310300 | -1.10088100 |
| H | 2.52899800  | -1.82786000 | -0.14520300 |

|                                                                    |             |             |             |
|--------------------------------------------------------------------|-------------|-------------|-------------|
| H                                                                  | 2.99676000  | −3.06450200 | −1.32575400 |
| P                                                                  | −0.67849300 | 0.77277400  | 2.07292100  |
| P                                                                  | 0.54849400  | −1.02232700 | −2.08926600 |
| Ru                                                                 | −0.30160300 | −0.00940000 | −0.12787300 |
| H                                                                  | 0.34686000  | −1.24307600 | 0.61577500  |
| H                                                                  | 1.21056300  | 0.23801100  | 0.20025000  |
| H                                                                  | −1.72334600 | −1.04227400 | −0.59513900 |
| H                                                                  | −1.94113800 | −0.75080900 | 0.14767300  |
| C                                                                  | 0.08691300  | 1.89543700  | −0.71861400 |
| O                                                                  | −1.07190100 | 1.78854400  | −1.17908200 |
| O                                                                  | 0.95135200  | 2.74614500  | −0.65857500 |
| <b>TS<sub>2,3</sub>-Ru</b>                                         |             |             |             |
| $G_{\text{solv}} = -2143.255352; E_{\text{solv}} = -2144.03527333$ |             |             |             |
| C                                                                  | 10.87380400 | 5.18149900  | 7.76658200  |
| H                                                                  | 10.88560600 | 5.45737400  | 8.82773700  |
| C                                                                  | 10.92714900 | 3.62443700  | 7.67449000  |
| H                                                                  | 11.72002500 | 3.26350800  | 7.01374100  |
| H                                                                  | 11.13268100 | 3.20571000  | 8.66456000  |
| C                                                                  | 9.53709600  | 3.18107100  | 7.17160000  |
| H                                                                  | 9.56047100  | 3.03140900  | 6.08388000  |
| H                                                                  | 9.21086800  | 2.23823000  | 7.62171000  |
| C                                                                  | 8.61417500  | 4.35905000  | 7.49541700  |
| H                                                                  | 8.34760400  | 4.35158900  | 8.56048000  |
| H                                                                  | 7.68414600  | 4.34975000  | 6.91820800  |
| C                                                                  | 9.49743200  | 5.56957900  | 7.18468600  |
| H                                                                  | 9.11816600  | 6.50653800  | 7.60387300  |
| H                                                                  | 9.56241900  | 5.69763700  | 6.09637400  |
| C                                                                  | 13.69035800 | 5.77432200  | 8.16121400  |
| H                                                                  | 13.36480300 | 6.19570400  | 9.11985500  |
| C                                                                  | 14.06236500 | 4.28927500  | 8.38747100  |
| H                                                                  | 13.49651200 | 3.84241400  | 9.21107100  |
| H                                                                  | 13.86141700 | 3.69987500  | 7.48624200  |
| C                                                                  | 15.57567100 | 4.30828100  | 8.62840800  |
| H                                                                  | 15.79745700 | 4.64410300  | 9.65029800  |
| H                                                                  | 16.03662200 | 3.32405500  | 8.49250600  |
| C                                                                  | 16.05496700 | 5.34881900  | 7.61519500  |
| H                                                                  | 16.02343800 | 4.91128700  | 6.60945400  |
| H                                                                  | 17.07581000 | 5.70110600  | 7.79537000  |
| C                                                                  | 15.01244100 | 6.47375200  | 7.71687700  |
| H                                                                  | 14.91650100 | 7.02036100  | 6.77456300  |
| H                                                                  | 15.31228600 | 7.20241600  | 8.47896400  |
| C                                                                  | 11.95390600 | 7.87681300  | 7.32111200  |
| H                                                                  | 12.92658600 | 8.34829000  | 7.13903100  |
| C                                                                  | 11.50972200 | 8.26472500  | 8.74825500  |
| H                                                                  | 10.77837800 | 7.55260200  | 9.15062000  |
| H                                                                  | 12.34903500 | 8.30793600  | 9.44971700  |
| C                                                                  | 10.82372300 | 9.61986200  | 8.54725800  |
| H                                                                  | 10.21071700 | 9.91935800  | 9.40388200  |
| H                                                                  | 11.58016700 | 10.39880500 | 8.38711800  |
| C                                                                  | 10.01000200 | 9.40528700  | 7.26692900  |
| H                                                                  | 9.71033500  | 10.34238800 | 6.78779500  |
| H                                                                  | 9.09053700  | 8.85684100  | 7.50958900  |
| C                                                                  | 10.92137100 | 8.54831300  | 6.36454800  |
| H                                                                  | 11.45221100 | 9.17082600  | 5.63942300  |
| H                                                                  | 10.34826900 | 7.82428400  | 5.77963100  |
| C                                                                  | 12.92139000 | 4.90028900  | 1.13524400  |
| H                                                                  | 13.30001700 | 4.17655200  | 0.40078800  |
| C                                                                  | 13.41573800 | 6.29634100  | 0.71185700  |

|                                                                       |             |             |             |
|-----------------------------------------------------------------------|-------------|-------------|-------------|
| H                                                                     | 14.45423300 | 6.28634200  | 0.36793300  |
| H                                                                     | 13.33340300 | 7.00058000  | 1.54609700  |
| C                                                                     | 12.42588200 | 6.68738200  | −0.38927800 |
| H                                                                     | 12.45712200 | 7.75494800  | −0.62879800 |
| H                                                                     | 12.65459100 | 6.13210800  | −1.30888400 |
| C                                                                     | 11.07113900 | 6.24409900  | 0.17864200  |
| H                                                                     | 10.67692400 | 7.02946500  | 0.83232000  |
| H                                                                     | 10.32534900 | 6.06287800  | −0.60173900 |
| C                                                                     | 11.37353500 | 4.97400600  | 1.01213400  |
| H                                                                     | 10.98413600 | 4.06908200  | 0.53298900  |
| H                                                                     | 10.89869100 | 5.04617000  | 1.99732700  |
| C                                                                     | 12.79218400 | 2.56614700  | 2.74899900  |
| H                                                                     | 11.71847400 | 2.72993500  | 2.58582800  |
| C                                                                     | 12.94432300 | 1.72558300  | 4.05269200  |
| H                                                                     | 13.70681000 | 2.12446700  | 4.72374800  |
| H                                                                     | 12.00473900 | 1.74294400  | 4.61493900  |
| C                                                                     | 13.29528800 | 0.29294000  | 3.59254900  |
| H                                                                     | 14.37462300 | 0.12384000  | 3.69306200  |
| H                                                                     | 12.79154100 | −0.47467300 | 4.18801700  |
| C                                                                     | 12.91373200 | 0.24658700  | 2.10877800  |
| H                                                                     | 11.83225600 | 0.09256800  | 1.99863500  |
| H                                                                     | 13.42129400 | −0.55245100 | 1.55888100  |
| C                                                                     | 13.28991400 | 1.64627700  | 1.61552900  |
| H                                                                     | 12.84579400 | 1.89554300  | 0.64665400  |
| H                                                                     | 14.38021300 | 1.70776200  | 1.50747600  |
| C                                                                     | 15.30199100 | 4.12386200  | 2.60750600  |
| H                                                                     | 15.46915400 | 3.59541100  | 1.66159100  |
| C                                                                     | 16.05994300 | 5.48752500  | 2.55198700  |
| H                                                                     | 16.53976600 | 5.59626500  | 1.57334400  |
| H                                                                     | 15.40472600 | 6.35317400  | 2.67865900  |
| C                                                                     | 17.11803500 | 5.42514100  | 3.66645600  |
| H                                                                     | 18.01670700 | 5.99986400  | 3.42153800  |
| H                                                                     | 16.70231500 | 5.84072600  | 4.59276100  |
| C                                                                     | 17.38291300 | 3.92941500  | 3.85086400  |
| H                                                                     | 17.87561000 | 3.69234900  | 4.79965900  |
| H                                                                     | 18.01968200 | 3.55335800  | 3.03892800  |
| C                                                                     | 15.97780700 | 3.32843600  | 3.74937000  |
| H                                                                     | 15.45293100 | 3.50715700  | 4.69475300  |
| H                                                                     | 15.97375500 | 2.24918200  | 3.56163900  |
| P                                                                     | 12.29422000 | 6.08205200  | 6.97685900  |
| P                                                                     | 13.46790900 | 4.29924600  | 2.79988200  |
| Ru                                                                    | 12.75548400 | 5.43381800  | 4.74430600  |
| H                                                                     | 13.52913600 | 4.28105400  | 5.48952100  |
| H                                                                     | 14.21216300 | 6.13156100  | 4.58907100  |
| H                                                                     | 11.25750000 | 4.60118300  | 4.43861200  |
| H                                                                     | 11.56289800 | 4.25886900  | 5.16261600  |
| C                                                                     | 13.39202200 | 7.45580200  | 4.43913100  |
| O                                                                     | 12.39857800 | 7.42141200  | 3.69157500  |
| O                                                                     | 14.15215400 | 8.29801200  | 4.87112500  |
| <b>3Ru</b>                                                            |             |             |             |
| $G_{\text{solv}} = -2143.269743$ ; $E_{\text{solv}} = -2144.04797961$ |             |             |             |
| C                                                                     | −1.63795900 | −0.44106100 | 3.09479400  |
| H                                                                     | −1.82203700 | 0.00141900  | 4.08114100  |
| C                                                                     | −0.93462000 | −1.81965200 | 3.29973200  |
| H                                                                     | 0.00560800  | −1.90259600 | 2.74904800  |
| H                                                                     | −0.69699000 | −1.95627900 | 4.35997700  |
| C                                                                     | −1.94737400 | −2.88174300 | 2.82979000  |
| H                                                                     | −1.76061600 | −3.13152100 | 1.77727400  |

|   |             |             |             |
|---|-------------|-------------|-------------|
| H | −1.87839900 | −3.81031400 | 3.40515000  |
| C | −3.30792300 | −2.19095200 | 2.94949200  |
| H | −3.63035100 | −2.16502700 | 3.99878500  |
| H | −4.09484800 | −2.68400700 | 2.36946100  |
| C | −3.00280100 | −0.77542100 | 2.45303300  |
| H | −3.77343800 | −0.04219500 | 2.71205000  |
| H | −2.91675400 | −0.79698100 | 1.36027700  |
| C | 0.67542300  | 1.26185100  | 3.38695500  |
| H | 0.15062500  | 1.47126700  | 4.32743800  |
| C | 1.72585600  | 0.15383700  | 3.64272500  |
| H | 1.41309100  | −0.54315600 | 4.42583000  |
| H | 1.89419500  | −0.42974500 | 2.72831800  |
| C | 3.00720400  | 0.91851300  | 3.98801900  |
| H | 2.95844800  | 1.29279900  | 5.01927200  |
| H | 3.90614800  | 0.29969100  | 3.89940000  |
| C | 2.97630300  | 2.08596000  | 3.00024000  |
| H | 3.27486800  | 1.73338400  | 2.00441600  |
| H | 3.64932300  | 2.90545000  | 3.26952800  |
| C | 1.50058500  | 2.52124800  | 2.97758000  |
| H | 1.22846300  | 2.92557500  | 1.99902900  |
| H | 1.32323900  | 3.32319400  | 3.70237700  |
| C | −1.66042100 | 2.32939400  | 2.07808000  |
| H | −0.94494600 | 3.09978300  | 1.76862900  |
| C | −2.32145000 | 2.80832500  | 3.38508300  |
| H | −2.78568300 | 1.97406800  | 3.92686500  |
| H | −1.60798100 | 3.28905900  | 4.06244200  |
| C | −3.41773300 | 3.75540400  | 2.88763200  |
| H | −4.16171900 | 3.99162000  | 3.65544100  |
| H | −2.96731100 | 4.69998800  | 2.55655300  |
| C | −4.00672600 | 3.00200400  | 1.68845700  |
| H | −4.55246800 | 3.65642000  | 1.00176000  |
| H | −4.71715300 | 2.24717100  | 2.04971800  |
| C | −2.79839900 | 2.31435600  | 1.01412000  |
| H | −2.46585200 | 2.85673400  | 0.12500500  |
| H | −3.05208000 | 1.30598600  | 0.67956400  |
| C | 0.25393800  | 0.13278000  | −3.59546600 |
| H | 0.28146700  | −0.55146800 | −4.45319700 |
| C | 1.32254100  | 1.21500300  | −3.84530700 |
| H | 2.22997700  | 0.80390300  | −4.29914700 |
| H | 1.61204100  | 1.71846500  | −2.91905400 |
| C | 0.59469300  | 2.21619300  | −4.74745800 |
| H | 1.10846100  | 3.18083300  | −4.80648900 |
| H | 0.51627400  | 1.81397400  | −5.76677900 |
| C | −0.79258300 | 2.31647200  | −4.10269200 |
| H | −0.74309200 | 2.99727200  | −3.24687500 |
| H | −1.55524300 | 2.69592700  | −4.79046100 |
| C | −1.10702600 | 0.88834200  | −3.60114300 |
| H | −1.81778200 | 0.37722200  | −4.26007400 |
| H | −1.55530000 | 0.92383300  | −2.60256400 |
| C | −0.77721000 | −2.25451200 | −2.46631600 |
| H | −1.70339700 | −1.68116600 | −2.60411900 |
| C | −1.04070700 | −3.29863700 | −1.33964200 |
| H | −0.23810200 | −3.33393000 | −0.60002000 |
| H | −1.95079900 | −3.02688000 | −0.79517300 |
| C | −1.19525100 | −4.66127100 | −2.05167500 |
| H | −0.26208000 | −5.23266500 | −1.97064600 |
| H | −1.98863500 | −5.27546800 | −1.61450700 |
| C | −1.44941000 | −4.31315300 | −3.52244300 |

|                                                                    |             |             |             |
|--------------------------------------------------------------------|-------------|-------------|-------------|
| H                                                                  | -2.50134600 | -4.03605100 | -3.67058600 |
| H                                                                  | -1.22321900 | -5.13821300 | -4.20550000 |
| C                                                                  | -0.55777300 | -3.08864800 | -3.74546000 |
| H                                                                  | -0.81021700 | -2.53741400 | -4.65655800 |
| H                                                                  | 0.48720800  | -3.41281000 | -3.83165400 |
| C                                                                  | 2.12749100  | -1.70660400 | -2.34789700 |
| H                                                                  | 2.18177000  | -2.00777400 | -3.40088600 |
| C                                                                  | 3.31541800  | -0.74200300 | -2.03887700 |
| H                                                                  | 3.89305900  | -0.56724600 | -2.95244200 |
| H                                                                  | 2.99242600  | 0.23987900  | -1.68252500 |
| C                                                                  | 4.17762900  | -1.46341200 | -0.98757700 |
| H                                                                  | 5.23838200  | -1.20634600 | -1.06856700 |
| H                                                                  | 3.84609300  | -1.18544100 | 0.02185300  |
| C                                                                  | 3.88814800  | -2.94743800 | -1.22378400 |
| H                                                                  | 4.18657300  | -3.58658300 | -0.38634500 |
| H                                                                  | 4.41632000  | -3.29870500 | -2.12008300 |
| C                                                                  | 2.37568000  | -2.95030400 | -1.46231100 |
| H                                                                  | 1.87357800  | -2.83678700 | -0.49379700 |
| H                                                                  | 2.00250000  | -3.87060500 | -1.92340300 |
| P                                                                  | -0.62836000 | 0.79376000  | 2.15022800  |
| P                                                                  | 0.46698400  | -0.92401800 | -2.09018900 |
| Ru                                                                 | 0.07877900  | 0.05797100  | 0.02445200  |
| H                                                                  | 0.81394900  | -1.17559200 | 0.66409700  |
| H                                                                  | 1.72711500  | 1.20443900  | 0.05428600  |
| H                                                                  | -1.41594200 | -0.28822100 | -0.25629100 |
| H                                                                  | -0.46984400 | -1.32961400 | 0.45541800  |
| C                                                                  | 1.30573800  | 2.17492800  | -0.46481300 |
| O                                                                  | 0.07218900  | 2.12449100  | -0.73317200 |
| O                                                                  | 2.14890000  | 3.04093600  | -0.64380900 |
| <b>TS<sub>3,4-Ru</sub></b>                                         |             |             |             |
| $G_{\text{solv}} = -2143.267578; E_{\text{solv}} = -2144.04765806$ |             |             |             |
| C                                                                  | -1.52908100 | -0.46600200 | 3.14421500  |
| H                                                                  | -1.73412600 | -0.00123200 | 4.11591100  |
| C                                                                  | -0.80699700 | -1.82757600 | 3.39538800  |
| H                                                                  | 0.15413600  | -1.90417500 | 2.88074000  |
| H                                                                  | -0.60290200 | -1.94194400 | 4.46530900  |
| C                                                                  | -1.78418700 | -2.91646000 | 2.91322300  |
| H                                                                  | -1.57197000 | -3.16969700 | 1.86606600  |
| H                                                                  | -1.70520800 | -3.83894600 | 3.49705100  |
| C                                                                  | -3.16131600 | -2.25476200 | 3.00101100  |
| H                                                                  | -3.50166500 | -2.22334500 | 4.04444100  |
| H                                                                  | -3.92716000 | -2.77241900 | 2.41429600  |
| C                                                                  | -2.87867500 | -0.83949100 | 2.49057800  |
| H                                                                  | -3.66782900 | -0.11940300 | 2.72974900  |
| H                                                                  | -2.77791000 | -0.87341200 | 1.39951600  |
| C                                                                  | 0.76300100  | 1.26607600  | 3.41907800  |
| H                                                                  | 0.23254900  | 1.45840300  | 4.36021300  |
| C                                                                  | 1.84469200  | 0.18991000  | 3.67560700  |
| H                                                                  | 1.54197300  | -0.53316000 | 4.43862600  |
| H                                                                  | 2.05127600  | -0.37009000 | 2.75327300  |
| C                                                                  | 3.08990300  | 0.99284600  | 4.06206900  |
| H                                                                  | 3.00094400  | 1.35148900  | 5.09616100  |
| H                                                                  | 4.01205300  | 0.40680700  | 3.99009900  |
| C                                                                  | 3.04435500  | 2.17126700  | 3.08763400  |
| H                                                                  | 3.39193200  | 1.84260100  | 2.09942500  |
| H                                                                  | 3.67532500  | 3.01248900  | 3.38936500  |
| C                                                                  | 1.55350800  | 2.54978800  | 3.01629700  |
| H                                                                  | 1.29624700  | 2.92813700  | 2.02363600  |

|   |             |             |             |
|---|-------------|-------------|-------------|
| H | 1.32320100  | 3.35561400  | 3.72132500  |
| C | -1.57311600 | 2.28152800  | 2.06692600  |
| H | -0.86507500 | 3.05176000  | 1.74097800  |
| C | -2.24375500 | 2.78424500  | 3.35974900  |
| H | -2.70535000 | 1.95911700  | 3.91771400  |
| H | -1.53693100 | 3.28476500  | 4.02980600  |
| C | -3.34353500 | 3.71278200  | 2.83567200  |
| H | -4.09305300 | 3.96150800  | 3.59414500  |
| H | -2.89720600 | 4.65244100  | 2.48568900  |
| C | -3.92154100 | 2.92879600  | 1.65071500  |
| H | -4.46625000 | 3.56465500  | 0.94600700  |
| H | -4.63079100 | 2.17928200  | 2.02525000  |
| C | -2.70626000 | 2.23126100  | 0.99917400  |
| H | -2.37171200 | 2.75133000  | 0.09768000  |
| H | -2.95269100 | 1.21311500  | 0.69037400  |
| C | 0.34948400  | 0.11964100  | -3.55031900 |
| H | 0.35335100  | -0.55260000 | -4.41782800 |
| C | 1.44033400  | 1.18091300  | -3.79524800 |
| H | 2.33034600  | 0.75702500  | -4.27153900 |
| H | 1.75532000  | 1.65825500  | -2.86360400 |
| C | 0.72442300  | 2.21856800  | -4.66498400 |
| H | 1.26056700  | 3.17166500  | -4.70993800 |
| H | 0.62173400  | 1.84073500  | -5.69159900 |
| C | -0.64985500 | 2.33760100  | -3.99663900 |
| H | -0.56766800 | 2.99040400  | -3.12183800 |
| H | -1.41208700 | 2.75714300  | -4.66130900 |
| C | -0.99496200 | 0.90484100  | -3.53112100 |
| H | -1.71745400 | 0.42652400  | -4.20204800 |
| H | -1.43953500 | 0.92478700  | -2.53066700 |
| C | -0.70559500 | -2.27286800 | -2.45191300 |
| H | -1.62322400 | -1.68503300 | -2.58804400 |
| C | -0.98787500 | -3.31852100 | -1.33289300 |
| H | -0.16386800 | -3.40471100 | -0.62112600 |
| H | -1.86516000 | -3.01132800 | -0.75491500 |
| C | -1.22435400 | -4.66379400 | -2.05842800 |
| H | -0.33172500 | -5.29559800 | -1.97281900 |
| H | -2.05998700 | -5.22808400 | -1.63309000 |
| C | -1.44380300 | -4.29300700 | -3.53008400 |
| H | -2.48104400 | -3.97113500 | -3.69047400 |
| H | -1.24349100 | -5.12227700 | -4.21609000 |
| C | -0.50002700 | -3.10463900 | -3.73371900 |
| H | -0.71830500 | -2.53867400 | -4.64465500 |
| H | 0.53279600  | -3.46884500 | -3.80700800 |
| C | 2.20732300  | -1.76157800 | -2.34300300 |
| H | 2.25949900  | -2.04281300 | -3.40166000 |
| C | 3.40236500  | -0.81238400 | -2.01297300 |
| H | 3.97994800  | -0.61800900 | -2.92244400 |
| H | 3.08386900  | 0.16280600  | -1.63299100 |
| C | 4.26151700  | -1.56316600 | -0.97961800 |
| H | 5.32416700  | -1.31328500 | -1.05765400 |
| H | 3.93528600  | -1.30451100 | 0.03692500  |
| C | 3.95890000  | -3.03929800 | -1.24654000 |
| H | 4.25456500  | -3.69884300 | -0.42408500 |
| H | 4.48134800  | -3.37540400 | -2.15183400 |
| C | 2.44603400  | -3.02385100 | -1.48126800 |
| H | 1.94772200  | -2.92425900 | -0.50895600 |
| H | 2.06271800  | -3.93232900 | -1.95706900 |
| P | -0.52526500 | 0.75940300  | 2.17916100  |

|                                                                    |             |             |             |
|--------------------------------------------------------------------|-------------|-------------|-------------|
| P                                                                  | 0.55682000  | −0.96348500 | −2.06353500 |
| Ru                                                                 | 0.19458200  | −0.01157500 | 0.06971100  |
| H                                                                  | 0.80616000  | −1.34479400 | 0.71289000  |
| H                                                                  | 1.95622200  | 1.36871800  | 0.07681100  |
| H                                                                  | −1.29320900 | −0.35076200 | −0.20947700 |
| H                                                                  | −0.23708700 | −1.45488000 | 0.55947400  |
| C                                                                  | 1.41025600  | 2.24096100  | −0.44239700 |
| O                                                                  | 0.18042100  | 2.01779200  | −0.67668800 |
| O                                                                  | 2.09001100  | 3.23006100  | −0.68656600 |
| <b>4Ru</b>                                                         |             |             |             |
| $G_{\text{solv}} = -2143.272023; E_{\text{solv}} = -2144.05278249$ |             |             |             |
| C                                                                  | −1.76752900 | −0.36046400 | 3.15364400  |
| H                                                                  | −1.85387900 | 0.09485700  | 4.14764800  |
| C                                                                  | −1.28953600 | −1.83466900 | 3.33275900  |
| H                                                                  | −0.42739300 | −2.07921200 | 2.70691000  |
| H                                                                  | −0.98265600 | −1.99891000 | 4.37064700  |
| C                                                                  | −2.50077000 | −2.72018800 | 2.97067700  |
| H                                                                  | −2.41828300 | −3.05509900 | 1.92864100  |
| H                                                                  | −2.56689100 | −3.61551500 | 3.59659500  |
| C                                                                  | −3.71335100 | −1.79518100 | 3.10621200  |
| H                                                                  | −3.98666500 | −1.67650900 | 4.16298600  |
| H                                                                  | −4.59597000 | −2.16075000 | 2.57154600  |
| C                                                                  | −3.18367400 | −0.47180500 | 2.54999800  |
| H                                                                  | −3.81071100 | 0.39147900  | 2.79426800  |
| H                                                                  | −3.12698700 | −0.54411600 | 1.45560400  |
| C                                                                  | 0.81861400  | 0.94610300  | 3.30959500  |
| H                                                                  | 0.40639300  | 1.29962600  | 4.26274300  |
| C                                                                  | 1.64970900  | −0.33459900 | 3.56845800  |
| H                                                                  | 1.28550700  | −0.89793800 | 4.43280100  |
| H                                                                  | 1.60831500  | −0.99836100 | 2.69671800  |
| C                                                                  | 3.08772800  | 0.16816100  | 3.73457600  |
| H                                                                  | 3.22733700  | 0.60113700  | 4.73394000  |
| H                                                                  | 3.83010400  | −0.62700700 | 3.60821400  |
| C                                                                  | 3.18370500  | 1.26171700  | 2.66949400  |
| H                                                                  | 3.27694000  | 0.79708400  | 1.67914300  |
| H                                                                  | 4.03915100  | 1.93086000  | 2.80449600  |
| C                                                                  | 1.83699900  | 1.99612000  | 2.76845700  |
| H                                                                  | 1.54587600  | 2.41416500  | 1.80187800  |
| H                                                                  | 1.90596700  | 2.83654300  | 3.46778300  |
| C                                                                  | −1.39775400 | 2.39132200  | 2.16809200  |
| H                                                                  | −0.58180600 | 3.05079800  | 1.85069800  |
| C                                                                  | −1.94341600 | 2.93464700  | 3.50390600  |
| H                                                                  | −2.48763600 | 2.16010700  | 4.05922700  |
| H                                                                  | −1.14969000 | 3.31401600  | 4.15586900  |
| C                                                                  | −2.93222000 | 4.01802400  | 3.06058500  |
| H                                                                  | −3.61291000 | 4.32945400  | 3.85987200  |
| H                                                                  | −2.38236900 | 4.90564200  | 2.72297000  |
| C                                                                  | −3.65232800 | 3.36287700  | 1.87624300  |
| H                                                                  | −4.15164200 | 4.08851700  | 1.22694100  |
| H                                                                  | −4.42408500 | 2.67991900  | 2.25465400  |
| C                                                                  | −2.55334400 | 2.57121900  | 1.13656500  |
| H                                                                  | −2.17531600 | 3.11796600  | 0.26957100  |
| H                                                                  | −2.93709500 | 1.61942100  | 0.75612900  |
| C                                                                  | 0.23801600  | 0.04397100  | −3.60527300 |
| H                                                                  | 0.34103500  | −0.62451400 | −4.46808900 |
| C                                                                  | 1.22088900  | 1.21809300  | −3.80540100 |
| H                                                                  | 2.13313400  | 0.90414100  | −4.32296000 |
| H                                                                  | 1.51711200  | 1.65184900  | −2.84742300 |

|                                                                      |             |             |             |
|----------------------------------------------------------------------|-------------|-------------|-------------|
| C                                                                    | 0.40211400  | 2.24790600  | -4.59023500 |
| H                                                                    | 0.84196800  | 3.24931900  | -4.55459000 |
| H                                                                    | 0.32911100  | 1.94644800  | -5.64431900 |
| C                                                                    | -0.97115800 | 2.17837700  | -3.91559800 |
| H                                                                    | -0.93323300 | 2.73303600  | -2.97218800 |
| H                                                                    | -1.77274600 | 2.60396000  | -4.52807200 |
| C                                                                    | -1.18497400 | 0.67947700  | -3.62433100 |
| H                                                                    | -1.79451500 | 0.20513100  | -4.40183500 |
| H                                                                    | -1.71574000 | 0.54128300  | -2.67392100 |
| C                                                                    | -0.49125700 | -2.49268800 | -2.55944100 |
| H                                                                    | -1.48737300 | -2.07078600 | -2.75070100 |
| C                                                                    | -0.64825400 | -3.58467100 | -1.45761500 |
| H                                                                    | 0.08872800  | -3.48801600 | -0.65732800 |
| H                                                                    | -1.63143400 | -3.49058200 | -0.98468000 |
| C                                                                    | -0.50486900 | -4.94184200 | -2.18047100 |
| H                                                                    | 0.51264500  | -5.33053100 | -2.04745600 |
| H                                                                    | -1.19266200 | -5.69880500 | -1.79127600 |
| C                                                                    | -0.73562400 | -4.62590800 | -3.66192500 |
| H                                                                    | -1.81055900 | -4.53986800 | -3.86861800 |
| H                                                                    | -0.32771600 | -5.38830200 | -4.33343200 |
| C                                                                    | -0.06531100 | -3.25960800 | -3.82999500 |
| H                                                                    | -0.36462200 | -2.74841100 | -4.74991600 |
| H                                                                    | 1.02346900  | -3.39281200 | -3.86352200 |
| C                                                                    | 2.27910100  | -1.51315400 | -2.22024800 |
| H                                                                    | 2.47090000  | -1.77468700 | -3.26851500 |
| C                                                                    | 3.28250100  | -0.40014800 | -1.78876500 |
| H                                                                    | 3.77572300  | 0.02334200  | -2.66873600 |
| H                                                                    | 2.78118300  | 0.42544500  | -1.27468200 |
| C                                                                    | 4.30076800  | -1.08639300 | -0.85156300 |
| H                                                                    | 5.32055800  | -0.71792400 | -0.99940200 |
| H                                                                    | 4.03021200  | -0.89159000 | 0.19396300  |
| C                                                                    | 4.15088900  | -2.58372000 | -1.13641200 |
| H                                                                    | 4.53330300  | -3.21587600 | -0.32838500 |
| H                                                                    | 4.68603900  | -2.85436400 | -2.05617200 |
| C                                                                    | 2.64202400  | -2.72994100 | -1.34459900 |
| H                                                                    | 2.14275400  | -2.65805200 | -0.36968500 |
| H                                                                    | 2.35036200  | -3.68022900 | -1.80358600 |
| P                                                                    | -0.62036000 | 0.70880000  | 2.16500400  |
| P                                                                    | 0.50642200  | -0.99142800 | -2.09324100 |
| Ru                                                                   | -0.11022300 | -0.06627200 | -0.00150000 |
| H                                                                    | 1.31230100  | -0.39352600 | 0.50601600  |
| H                                                                    | 1.98120200  | 2.52624700  | -0.46891600 |
| H                                                                    | -0.96765600 | -1.38554400 | 0.30772200  |
| H                                                                    | 0.04136900  | -1.54037200 | 0.57639700  |
| C                                                                    | 0.94014800  | 2.83040500  | -0.71304900 |
| O                                                                    | 0.07159800  | 1.89139000  | -0.64393800 |
| O                                                                    | 0.71656600  | 3.99795300  | -1.02694000 |
| TS <sub>4,5-Ru</sub>                                                 |             |             |             |
| G <sub>solv</sub> = -2143.270082; E <sub>solv</sub> = -2144.05152607 |             |             |             |
| C                                                                    | -1.57476400 | -0.44840400 | 3.20596600  |
| H                                                                    | -1.61327200 | -0.00616200 | 4.20941500  |
| C                                                                    | -0.91623000 | -1.85768500 | 3.31856100  |
| H                                                                    | -0.11837200 | -2.00667300 | 2.58708400  |
| H                                                                    | -0.46695700 | -1.97890100 | 4.30942400  |
| C                                                                    | -2.05404200 | -2.87764800 | 3.09585100  |
| H                                                                    | -2.04668800 | -3.21844900 | 2.05274000  |
| H                                                                    | -1.95199100 | -3.76370400 | 3.73020000  |
| C                                                                    | -3.34136800 | -2.09087100 | 3.35736600  |

|   |             |             |             |
|---|-------------|-------------|-------------|
| H | -3.51676400 | -1.99208600 | 4.43676700  |
| H | -4.22811700 | -2.55700000 | 2.91576900  |
| C | -3.02313400 | -0.72335300 | 2.74917500  |
| H | -3.71554100 | 0.06625400  | 3.05736400  |
| H | -3.07007700 | -0.80037500 | 1.65557800  |
| C | 0.80555200  | 1.21964600  | 3.17380100  |
| H | 0.41237800  | 1.58639300  | 4.12926500  |
| C | 1.78374400  | 0.04224700  | 3.43673500  |
| H | 1.60379900  | -0.43470000 | 4.40503500  |
| H | 1.67186600  | -0.72904600 | 2.66678000  |
| C | 3.18642600  | 0.65026700  | 3.31149000  |
| H | 3.46467700  | 1.16939600  | 4.23803700  |
| H | 3.95416300  | -0.10369400 | 3.10822200  |
| C | 3.01275000  | 1.66293500  | 2.17918300  |
| H | 2.94139500  | 1.13285000  | 1.21958300  |
| H | 3.83433400  | 2.38253000  | 2.10381400  |
| C | 1.66981500  | 2.32989800  | 2.50325700  |
| H | 1.20711900  | 2.75796200  | 1.61067800  |
| H | 1.81892700  | 3.15356200  | 3.21093600  |
| C | -1.67554000 | 2.30967700  | 2.18235700  |
| H | -0.98482100 | 3.08193200  | 1.82263700  |
| C | -2.22378300 | 2.78182000  | 3.54295700  |
| H | -2.64125500 | 1.94572900  | 4.11833900  |
| H | -1.45610800 | 3.25981300  | 4.16064000  |
| C | -3.35688100 | 3.73253400  | 3.14288900  |
| H | -4.03488000 | 3.96324500  | 3.97138500  |
| H | -2.93408200 | 4.67851200  | 2.78158500  |
| C | -4.04375000 | 2.98995400  | 1.98974600  |
| H | -4.63917700 | 3.65312000  | 1.35486900  |
| H | -4.72615000 | 2.23430300  | 2.40019000  |
| C | -2.89538200 | 2.30898100  | 1.21262900  |
| H | -2.62865200 | 2.86559000  | 0.31050800  |
| H | -3.17732900 | 1.30268400  | 0.88961400  |
| C | 0.48570500  | 0.12839100  | -3.61520600 |
| H | 0.68573300  | -0.53066600 | -4.47025200 |
| C | 1.56885600  | 1.22442100  | -3.61061100 |
| H | 2.55552700  | 0.83390700  | -3.88013800 |
| H | 1.64327600  | 1.68469200  | -2.62074600 |
| C | 1.03049700  | 2.24591900  | -4.61731400 |
| H | 1.52486700  | 3.21992000  | -4.54010800 |
| H | 1.18410900  | 1.87517100  | -5.63974600 |
| C | -0.46736100 | 2.31214900  | -4.29155700 |
| H | -0.63261400 | 3.00275900  | -3.45837600 |
| H | -1.06644600 | 2.66909600  | -5.13523000 |
| C | -0.85475400 | 0.87807200  | -3.85899500 |
| H | -1.44054700 | 0.36512500  | -4.62961100 |
| H | -1.47010900 | 0.91055300  | -2.95285200 |
| C | -0.76285900 | -2.25586200 | -2.69366600 |
| H | -1.65667800 | -1.67217600 | -2.95001200 |
| C | -1.18541800 | -3.32079000 | -1.63540200 |
| H | -0.53967000 | -3.32601400 | -0.75509200 |
| H | -2.19395700 | -3.09539000 | -1.27320900 |
| C | -1.14725500 | -4.67968800 | -2.36525500 |
| H | -0.19723200 | -5.18878900 | -2.15824100 |
| H | -1.95039600 | -5.35054400 | -2.04492700 |
| C | -1.21719500 | -4.32573300 | -3.85414500 |
| H | -2.25157000 | -4.09268000 | -4.13911200 |
| H | -0.86558400 | -5.13165700 | -4.50643100 |

|                                                                    |             |             |             |
|--------------------------------------------------------------------|-------------|-------------|-------------|
| C                                                                  | -0.35712000 | -3.06182400 | -3.94679900 |
| H                                                                  | -0.51799600 | -2.50208000 | -4.87348900 |
| H                                                                  | 0.70322700  | -3.34283000 | -3.90941800 |
| C                                                                  | 2.09976000  | -1.73980500 | -2.09328100 |
| H                                                                  | 2.34978500  | -2.00747400 | -3.12706900 |
| C                                                                  | 3.20419200  | -0.78430900 | -1.53823200 |
| H                                                                  | 3.91456100  | -0.53858700 | -2.33435300 |
| H                                                                  | 2.79638300  | 0.16296100  | -1.17178000 |
| C                                                                  | 3.90444700  | -1.56203100 | -0.40788000 |
| H                                                                  | 4.96657400  | -1.31167700 | -0.32180600 |
| H                                                                  | 3.43007200  | -1.32569100 | 0.55408800  |
| C                                                                  | 3.64945000  | -3.03262600 | -0.74703700 |
| H                                                                  | 3.81091600  | -3.70662800 | 0.10055500  |
| H                                                                  | 4.30980200  | -3.35465800 | -1.56303800 |
| C                                                                  | 2.19324000  | -3.01102400 | -1.21950200 |
| H                                                                  | 1.54573700  | -2.91949700 | -0.33956300 |
| H                                                                  | 1.89144900  | -3.91246600 | -1.76278200 |
| P                                                                  | -0.66358700 | 0.76073300  | 2.13478900  |
| P                                                                  | 0.42271200  | -0.94873300 | -2.11315400 |
| Ru                                                                 | -0.15475800 | 0.03113000  | -0.03900500 |
| H                                                                  | 1.05065300  | -0.72206000 | 0.57169000  |
| H                                                                  | 1.17485000  | 3.62035300  | -0.65254500 |
| H                                                                  | -1.40095800 | -0.89663600 | 0.03813000  |
| H                                                                  | -0.23216900 | -1.43804800 | 0.48839300  |
| C                                                                  | 0.13986800  | 3.23053300  | -0.75926700 |
| O                                                                  | 0.06891400  | 1.95249300  | -0.75551900 |
| O                                                                  | -0.78929700 | 4.02260400  | -0.90048100 |
| <b>5<sub>Ru</sub></b>                                              |             |             |             |
| $G_{\text{solv}} = -2143.275915; E_{\text{solv}} = -2144.05601824$ |             |             |             |
| C                                                                  | -0.99223400 | -0.50475900 | 3.32781300  |
| H                                                                  | -1.14182000 | -0.01302800 | 4.29631200  |
| C                                                                  | 0.05147500  | -1.65042500 | 3.51644500  |
| H                                                                  | 0.89398800  | -1.57369400 | 2.82402000  |
| H                                                                  | 0.46639300  | -1.60660100 | 4.52896300  |
| C                                                                  | -0.72168800 | -2.96618200 | 3.30108700  |
| H                                                                  | -0.62728300 | -3.28588900 | 2.25483900  |
| H                                                                  | -0.34654200 | -3.78077700 | 3.92863700  |
| C                                                                  | -2.18082700 | -2.60144200 | 3.58406300  |
| H                                                                  | -2.35241500 | -2.53218200 | 4.66649900  |
| H                                                                  | -2.89366900 | -3.32621300 | 3.17760500  |
| C                                                                  | -2.30590000 | -1.21932800 | 2.93850800  |
| H                                                                  | -3.19176100 | -0.66394400 | 3.26229900  |
| H                                                                  | -2.36708900 | -1.34103900 | 1.84988400  |
| C                                                                  | 0.90601800  | 1.67162600  | 3.05424200  |
| H                                                                  | 0.55145900  | 1.85103700  | 4.07821400  |
| C                                                                  | 2.22890600  | 0.88463600  | 3.13757500  |
| H                                                                  | 2.21128300  | 0.10470600  | 3.90441200  |
| H                                                                  | 2.44600000  | 0.39883000  | 2.17472800  |
| C                                                                  | 3.26933100  | 1.97318800  | 3.41247000  |
| H                                                                  | 3.19530500  | 2.29503700  | 4.45961900  |
| H                                                                  | 4.29705100  | 1.63639700  | 3.24123800  |
| C                                                                  | 2.84528400  | 3.10970300  | 2.47467800  |
| H                                                                  | 3.26648500  | 2.93741600  | 1.47679200  |
| H                                                                  | 3.20045400  | 4.08884700  | 2.81012600  |
| C                                                                  | 1.30053200  | 3.03146400  | 2.40724500  |
| H                                                                  | 0.97065700  | 3.08862600  | 1.36646500  |
| H                                                                  | 0.82554500  | 3.85848500  | 2.94494000  |
| C                                                                  | -1.79591700 | 2.08773700  | 2.16651000  |

|    |             |             |             |
|----|-------------|-------------|-------------|
| H  | -1.34950800 | 2.93296400  | 1.62805100  |
| C  | -2.25134500 | 2.60083200  | 3.54743400  |
| H  | -2.37057800 | 1.77401900  | 4.25995600  |
| H  | -1.54361100 | 3.31383100  | 3.98350600  |
| C  | -3.62536700 | 3.21146000  | 3.25494700  |
| H  | -4.21715700 | 3.38889000  | 4.15928000  |
| H  | -3.50057600 | 4.17376000  | 2.74178700  |
| C  | -4.26107900 | 2.18770800  | 2.30678800  |
| H  | -5.09069600 | 2.60306700  | 1.72646300  |
| H  | -4.66344200 | 1.35244900  | 2.89529000  |
| C  | -3.10213400 | 1.70038600  | 1.41056900  |
| H  | -3.10282100 | 2.18902500  | 0.43349300  |
| H  | -3.17591000 | 0.62866700  | 1.21386700  |
| C  | 1.09649900  | 0.08530600  | -3.51606200 |
| H  | 1.35376400  | -0.59566200 | -4.33926000 |
| C  | 2.31971100  | 0.97786900  | -3.23890300 |
| H  | 3.26221600  | 0.42150300  | -3.25856400 |
| H  | 2.22086100  | 1.45642500  | -2.25758800 |
| C  | 2.22761800  | 2.03507700  | -4.34373500 |
| H  | 2.85007400  | 2.91375800  | -4.14513000 |
| H  | 2.56146600  | 1.60222600  | -5.29611300 |
| C  | 0.72912000  | 2.36707200  | -4.40465900 |
| H  | 0.49617200  | 3.15963100  | -3.68491200 |
| H  | 0.42124800  | 2.73021200  | -5.38999700 |
| C  | -0.00543600 | 1.06373000  | -4.00282300 |
| H  | -0.55482500 | 0.63020600  | -4.84502400 |
| H  | -0.73825500 | 1.27087000  | -3.21597400 |
| C  | -0.90027500 | -1.83926800 | -2.84269000 |
| H  | -1.56320400 | -1.00834500 | -3.11271500 |
| C  | -1.69881000 | -2.78039900 | -1.89060300 |
| H  | -1.14802700 | -3.03425900 | -0.98220500 |
| H  | -2.61296800 | -2.27566700 | -1.56231600 |
| C  | -2.02054200 | -4.04184400 | -2.72055800 |
| H  | -1.29762100 | -4.83533600 | -2.49160500 |
| H  | -3.01697700 | -4.44115200 | -2.50773600 |
| C  | -1.84855800 | -3.60750300 | -4.18044200 |
| H  | -2.73410800 | -3.05272200 | -4.51669300 |
| H  | -1.70219100 | -4.44861700 | -4.86591000 |
| C  | -0.64168000 | -2.66656600 | -4.11885700 |
| H  | -0.53946900 | -2.03758000 | -5.00904000 |
| H  | 0.27626800  | -3.26154100 | -4.02665700 |
| C  | 1.92054300  | -2.23060200 | -2.01468600 |
| H  | 2.17845200  | -2.50449600 | -3.04488000 |
| C  | 3.19743500  | -1.67182500 | -1.31060300 |
| H  | 4.00671500  | -1.56194000 | -2.03971800 |
| H  | 3.03416000  | -0.68160800 | -0.86929700 |
| C  | 3.57274300  | -2.70701800 | -0.23123900 |
| H  | 4.65462400  | -2.78903500 | -0.08695900 |
| H  | 3.13273100  | -2.41710600 | 0.73191300  |
| C  | 2.92300200  | -4.00805000 | -0.71015200 |
| H  | 2.82350000  | -4.75732200 | 0.08210800  |
| H  | 3.51493800  | -4.45301500 | -1.52089100 |
| C  | 1.57274700  | -3.52318900 | -1.24485900 |
| H  | 0.92064200  | -3.30178400 | -0.39204300 |
| H  | 1.05779900  | -4.25604100 | -1.87445600 |
| P  | -0.45727700 | 0.81054800  | 2.13475900  |
| P  | 0.55803000  | -0.97199300 | -2.09603500 |
| Ru | 0.12072200  | 0.03411300  | -0.00680500 |

|                                                                    |             |             |             |
|--------------------------------------------------------------------|-------------|-------------|-------------|
| H                                                                  | 0.72950400  | −1.26262300 | 0.67124700  |
| H                                                                  | 0.09523700  | 3.88604500  | −1.25687600 |
| H                                                                  | −1.37512700 | −0.24469200 | −0.24716700 |
| H                                                                  | −0.40447700 | −1.37962900 | 0.43677600  |
| C                                                                  | −0.43228900 | 2.91828100  | −1.12459900 |
| O                                                                  | 0.34177000  | 1.98920900  | −0.70322000 |
| O                                                                  | −1.63252200 | 2.84290100  | −1.38517000 |
| <b>6Ru</b>                                                         |             |             |             |
| $G_{\text{solv}} = -2554.892522; E_{\text{solv}} = -2555.85853832$ |             |             |             |
| C                                                                  | −1.18313200 | −0.99547400 | 3.38121300  |
| H                                                                  | −1.46066000 | −0.53782500 | 4.33855200  |
| C                                                                  | 0.15887500  | −1.77030500 | 3.57512700  |
| H                                                                  | 0.93463700  | −1.44973100 | 2.87301000  |
| H                                                                  | 0.54785200  | −1.59074900 | 4.58273100  |
| C                                                                  | −0.18343900 | −3.26091900 | 3.38988000  |
| H                                                                  | −0.02281700 | −3.55492500 | 2.34387900  |
| H                                                                  | 0.43618600  | −3.91466400 | 4.01209300  |
| C                                                                  | −1.67693800 | −3.34856900 | 3.71342700  |
| H                                                                  | −1.83231900 | −3.31073500 | 4.79969200  |
| H                                                                  | −2.14762300 | −4.26373200 | 3.33903900  |
| C                                                                  | −2.23069000 | −2.08314600 | 3.05345500  |
| H                                                                  | −3.23287900 | −1.80916600 | 3.39801100  |
| H                                                                  | −2.29169200 | −2.25385600 | 1.97229900  |
| C                                                                  | −0.26395100 | 1.70282000  | 3.18988600  |
| H                                                                  | −0.92750700 | 1.85273300  | 4.05317000  |
| C                                                                  | 1.14213700  | 1.37495900  | 3.72927100  |
| H                                                                  | 1.09187300  | 0.75130800  | 4.62694000  |
| H                                                                  | 1.72119500  | 0.82993600  | 2.97887200  |
| C                                                                  | 1.80629300  | 2.74852900  | 4.00493000  |
| H                                                                  | 2.01179500  | 2.89568800  | 5.07032600  |
| H                                                                  | 2.76465100  | 2.80479200  | 3.48007600  |
| C                                                                  | 0.82818900  | 3.81584200  | 3.46728400  |
| H                                                                  | 1.34088500  | 4.66085700  | 2.99482600  |
| H                                                                  | 0.22432100  | 4.22276800  | 4.28827300  |
| C                                                                  | −0.08069900 | 3.05857000  | 2.49191600  |
| H                                                                  | 0.42884700  | 2.91223700  | 1.53410100  |
| H                                                                  | −1.02761500 | 3.57560800  | 2.30299400  |
| C                                                                  | −2.78693400 | 1.10132700  | 2.04768200  |
| H                                                                  | −2.62777400 | 2.02351500  | 1.47825600  |
| C                                                                  | −3.47993200 | 1.46849700  | 3.37639900  |
| H                                                                  | −3.35587800 | 0.67508500  | 4.12632200  |
| H                                                                  | −3.09383100 | 2.39694600  | 3.80910900  |
| C                                                                  | −4.95697700 | 1.56992500  | 2.98484100  |
| H                                                                  | −5.63238500 | 1.56369500  | 3.84699800  |
| H                                                                  | −5.12653100 | 2.50333600  | 2.43275000  |
| C                                                                  | −5.15117700 | 0.36790400  | 2.05511400  |
| H                                                                  | −6.03076900 | 0.46541700  | 1.41091800  |
| H                                                                  | −5.29149700 | −0.53800700 | 2.65966100  |
| C                                                                  | −3.83716400 | 0.27187300  | 1.25025500  |
| H                                                                  | −3.93903300 | 0.70645000  | 0.25211100  |
| H                                                                  | −3.54194000 | −0.76909800 | 1.10667000  |
| C                                                                  | −0.16976500 | −0.39694800 | −3.61703900 |
| H                                                                  | −0.18535400 | −1.10260700 | −4.45900200 |
| C                                                                  | 1.05206100  | 0.52063100  | −3.78070300 |
| H                                                                  | 1.94824500  | −0.01927700 | −4.10268000 |
| H                                                                  | 1.27505200  | 1.00749900  | −2.82815900 |
| C                                                                  | 0.57509800  | 1.55406500  | −4.80457600 |
| H                                                                  | 1.20932900  | 2.44751200  | −4.83789600 |

|    |             |             |             |
|----|-------------|-------------|-------------|
| H  | 0.57826100  | 1.11054300  | −5.80938000 |
| C  | −0.86156300 | 1.86355300  | −4.36091500 |
| H  | −0.85066400 | 2.65703900  | −3.60554100 |
| H  | −1.48974300 | 2.21524800  | −5.18537900 |
| C  | −1.39434600 | 0.55255600  | −3.73244500 |
| H  | −2.17503800 | 0.09470000  | −4.34960800 |
| H  | −1.83871800 | 0.75815500  | −2.75272700 |
| C  | −1.79485900 | −2.33553500 | −2.34032900 |
| H  | −2.52843200 | −1.52359700 | −2.42164600 |
| C  | −2.27710100 | −3.26605600 | −1.18888300 |
| H  | −1.45923100 | −3.60279400 | −0.54761500 |
| H  | −2.97401800 | −2.72221000 | −0.54381000 |
| C  | −2.95775300 | −4.47327400 | −1.87743300 |
| H  | −2.29484200 | −5.34671400 | −1.84173900 |
| H  | −3.89429900 | −4.76030800 | −1.38942900 |
| C  | −3.15469200 | −4.04671700 | −3.33779200 |
| H  | −4.05879400 | −3.43174900 | −3.43561600 |
| H  | −3.25401700 | −4.89509300 | −4.02264900 |
| C  | −1.91782600 | −3.18870300 | −3.61671200 |
| H  | −2.01224700 | −2.58067900 | −4.52220100 |
| H  | −1.04511000 | −3.84275400 | −3.74309200 |
| C  | 1.11873700  | −2.68259600 | −2.38170600 |
| H  | 0.95942700  | −3.05763500 | −3.39954000 |
| C  | 2.56615000  | −2.11388400 | −2.27840800 |
| H  | 3.06852000  | −2.21934600 | −3.24705800 |
| H  | 2.59618300  | −1.05438100 | −2.02080900 |
| C  | 3.27758300  | −2.96987500 | −1.21664600 |
| H  | 4.35477200  | −3.05162300 | −1.39483800 |
| H  | 3.13965500  | −2.52108500 | −0.22361200 |
| C  | 2.54605000  | −4.31267700 | −1.27111500 |
| H  | 2.72432100  | −4.94208500 | −0.39268500 |
| H  | 2.85851900  | −4.87807900 | −2.15918400 |
| C  | 1.08234500  | −3.88129500 | −1.40329200 |
| H  | 0.72896400  | −3.56014500 | −0.41587300 |
| H  | 0.41723500  | −4.68004900 | −1.74803800 |
| P  | −1.06990500 | 0.39698200  | 2.14837600  |
| P  | −0.19940200 | −1.41186100 | −2.06859000 |
| Ru | −0.26678700 | −0.32585900 | 0.02802900  |
| H  | 0.14794000  | −1.73288200 | 0.69534200  |
| H  | −0.43008700 | 3.53532200  | −1.20768500 |
| H  | −1.78484800 | −0.40613100 | −0.27148500 |
| H  | −0.86677500 | −1.70986900 | 0.52066900  |
| C  | −0.89773600 | 2.57040300  | −0.91502700 |
| O  | −0.04213500 | 1.62918500  | −0.77580700 |
| O  | −2.11967600 | 2.52152300  | −0.77473200 |
| C  | 3.71482700  | 2.21718900  | −1.08152600 |
| C  | 3.67445900  | 2.61841400  | 0.44069900  |
| H  | 1.69700400  | −0.16334600 | 0.33809000  |
| C  | 5.11209000  | 2.06877300  | −1.66456700 |
| H  | 5.03944900  | 1.76197700  | −2.71204100 |
| H  | 5.64608400  | 3.02411100  | −1.62789500 |
| H  | 5.69978300  | 1.31795600  | −1.13261800 |
| C  | 4.91316400  | 2.17895500  | 1.21987800  |
| H  | 5.79572500  | 2.75683300  | 0.92985000  |
| H  | 4.73579500  | 2.33834900  | 2.28724100  |
| H  | 5.12463200  | 1.11607500  | 1.06914400  |
| C  | 2.86776700  | 3.12184900  | −1.97425000 |
| H  | 3.27503600  | 4.13627100  | −2.01234200 |

|                                                                    |             |             |             |
|--------------------------------------------------------------------|-------------|-------------|-------------|
| H                                                                  | 2.86639000  | 2.71903900  | −2.99048900 |
| H                                                                  | 1.83250900  | 3.15950100  | −1.62591500 |
| C                                                                  | 3.38068000  | 4.08821300  | 0.69991600  |
| H                                                                  | 3.37859300  | 4.27947200  | 1.77646700  |
| H                                                                  | 4.15129500  | 4.72053700  | 0.24654700  |
| H                                                                  | 2.40705200  | 4.37884500  | 0.29989700  |
| O                                                                  | 3.08058800  | 0.91189400  | −1.07352600 |
| O                                                                  | 2.56940800  | 1.83181800  | 0.95006500  |
| B                                                                  | 2.32927700  | 0.83425700  | 0.05924700  |
| <b>TS<sub>6,7-Ru</sub></b>                                         |             |             |             |
| $G_{\text{solv}} = -2554.890853; E_{\text{solv}} = -2555.85615589$ |             |             |             |
| C                                                                  | −0.76419900 | −0.45194900 | 3.21557400  |
| H                                                                  | −1.05512400 | 0.00073800  | 4.17098600  |
| C                                                                  | 0.55060000  | −1.26554000 | 3.43554600  |
| H                                                                  | 1.35671900  | −0.95305600 | 2.76488500  |
| H                                                                  | 0.91068900  | −1.11627700 | 4.45884600  |
| C                                                                  | 0.17452700  | −2.74222200 | 3.21096700  |
| H                                                                  | 0.35497400  | −3.01925200 | 2.16378700  |
| H                                                                  | 0.76017800  | −3.42438400 | 3.83564700  |
| C                                                                  | −1.32862400 | −2.79628200 | 3.49448800  |
| H                                                                  | −1.51104300 | −2.77516900 | 4.57704600  |
| H                                                                  | −1.81285400 | −3.69152400 | 3.09036100  |
| C                                                                  | −1.83314600 | −1.50461000 | 2.84544900  |
| H                                                                  | −2.83469500 | −1.20922600 | 3.17441100  |
| H                                                                  | −1.87566700 | −1.65448800 | 1.76047700  |
| C                                                                  | 0.27223600  | 2.20207700  | 3.09563800  |
| H                                                                  | −0.34689000 | 2.28078300  | 4.00090700  |
| C                                                                  | 1.71061800  | 1.85770200  | 3.53009100  |
| H                                                                  | 1.72073700  | 1.16583700  | 4.37765000  |
| H                                                                  | 2.25098500  | 1.38158800  | 2.70660600  |
| C                                                                  | 2.37240700  | 3.21681800  | 3.87452200  |
| H                                                                  | 2.61662000  | 3.29107700  | 4.93941300  |
| H                                                                  | 3.30874300  | 3.32346300  | 3.31966400  |
| C                                                                  | 1.36521200  | 4.30884600  | 3.45230200  |
| H                                                                  | 1.85216200  | 5.17663300  | 2.99405600  |
| H                                                                  | 0.81090500  | 4.67259200  | 4.32671700  |
| C                                                                  | 0.40112700  | 3.60698900  | 2.48875800  |
| H                                                                  | 0.85629200  | 3.53952800  | 1.49712600  |
| H                                                                  | −0.55904700 | 4.12467000  | 2.39514400  |
| C                                                                  | −2.25645200 | 1.73217100  | 1.89457200  |
| H                                                                  | −2.05032500 | 2.65564100  | 1.34252400  |
| C                                                                  | −2.95044000 | 2.10818400  | 3.21943700  |
| H                                                                  | −2.88109200 | 1.29329200  | 3.95310100  |
| H                                                                  | −2.52155300 | 3.00477500  | 3.67859300  |
| C                                                                  | −4.41300000 | 2.29339000  | 2.80576300  |
| H                                                                  | −5.10294300 | 2.30885500  | 3.65612100  |
| H                                                                  | −4.52437800 | 3.24293000  | 2.26636000  |
| C                                                                  | −4.65306900 | 1.11627300  | 1.85444100  |
| H                                                                  | −5.51326000 | 1.26957300  | 1.19524300  |
| H                                                                  | −4.85376000 | 0.21158900  | 2.44325400  |
| C                                                                  | −3.32987800 | 0.95739900  | 1.07341500  |
| H                                                                  | −3.39463300 | 1.39561600  | 0.07340900  |
| H                                                                  | −3.08261900 | −0.09643200 | 0.93294700  |
| C                                                                  | 0.30058400  | 0.16854200  | −3.73615100 |
| H                                                                  | 0.20954900  | −0.53298600 | −4.57628900 |
| C                                                                  | 1.52401100  | 1.06139900  | −4.00102500 |
| H                                                                  | 2.37690400  | 0.49945800  | −4.39570000 |
| H                                                                  | 1.84261000  | 1.54732400  | −3.07616800 |

|    |             |             |             |
|----|-------------|-------------|-------------|
| C  | 0.98295100  | 2.10210600  | −4.98494600 |
| H  | 1.63310200  | 2.97941800  | −5.08017000 |
| H  | 0.88358100  | 1.65565400  | −5.98359300 |
| C  | −0.39905500 | 2.44658900  | −4.41393200 |
| H  | −0.29793800 | 3.22651200  | −3.65064100 |
| H  | −1.08633000 | 2.83042500  | −5.17439900 |
| C  | −0.91271500 | 1.14067500  | −3.75973900 |
| H  | −1.74078000 | 0.70249000  | −4.32757600 |
| H  | −1.28546900 | 1.34475500  | −2.75007000 |
| C  | −1.21620500 | −1.84408700 | −2.45103200 |
| H  | −1.98013500 | −1.05821400 | −2.50543900 |
| C  | −1.63595200 | −2.80920200 | −1.30118600 |
| H  | −0.80275300 | −3.08273800 | −0.65027800 |
| H  | −2.37938400 | −2.31882500 | −0.66475500 |
| C  | −2.22123600 | −4.06242400 | −1.99129800 |
| H  | −1.47703200 | −4.86876600 | −1.99433700 |
| H  | −3.11048200 | −4.44590300 | −1.48124600 |
| C  | −2.49982500 | −3.62783900 | −3.43438100 |
| H  | −3.44659100 | −3.07453400 | −3.48809200 |
| H  | −2.56532500 | −4.46881900 | −4.13228600 |
| C  | −1.33355900 | −2.68374600 | −3.73846400 |
| H  | −1.50316700 | −2.06828800 | −4.62760500 |
| H  | −0.42619800 | −3.27691600 | −3.91130300 |
| C  | 1.71154800  | −2.07663500 | −2.53434700 |
| H  | 1.54962000  | −2.46246000 | −3.54769500 |
| C  | 3.13799300  | −1.45281900 | −2.45722000 |
| H  | 3.62861700  | −1.54885700 | −3.43293400 |
| H  | 3.13368600  | −0.39169900 | −2.20557200 |
| C  | 3.89612100  | −2.27256700 | −1.39955400 |
| H  | 4.97316800  | −2.31438100 | −1.59272600 |
| H  | 3.75440100  | −1.81951800 | −0.40917700 |
| C  | 3.21645000  | −3.64296800 | −1.43312600 |
| H  | 3.43063500  | −4.25766800 | −0.55224900 |
| H  | 3.53794200  | −4.20357100 | −2.32105500 |
| C  | 1.73565100  | −3.26879200 | −1.54721000 |
| H  | 1.38575000  | −2.95082300 | −0.55736500 |
| H  | 1.09586800  | −4.09486200 | −1.87527500 |
| P  | −0.57321900 | 0.95547700  | 2.01044300  |
| P  | 0.34906200  | −0.86203700 | −2.19735800 |
| Ru | 0.24564300  | 0.22416700  | −0.10202600 |
| H  | 0.62709500  | −1.17008400 | 0.56715800  |
| H  | 0.49389100  | 4.15170500  | −1.15672700 |
| H  | −1.27460500 | 0.17323300  | −0.44260800 |
| H  | −0.45019900 | −1.10975600 | 0.35204400  |
| C  | −0.07920800 | 3.22665900  | −0.95038900 |
| O  | 0.65740500  | 2.17017700  | −0.90351600 |
| O  | −1.29517700 | 3.28748500  | −0.81148200 |
| C  | 4.14944600  | 2.81985400  | −1.32101800 |
| C  | 4.10715200  | 3.24983200  | 0.19250600  |
| H  | 2.10971100  | 0.55385500  | 0.19692700  |
| C  | 5.54004900  | 2.51452300  | −1.86157600 |
| H  | 5.46306400  | 2.20261000  | −2.90756700 |
| H  | 6.17715400  | 3.40438500  | −1.81915700 |
| H  | 6.02414100  | 1.70912900  | −1.30572900 |
| C  | 5.25832800  | 2.66248700  | 1.01044600  |
| H  | 6.21749700  | 3.11469400  | 0.74059600  |
| H  | 5.07682100  | 2.85489800  | 2.07136800  |
| H  | 5.33004200  | 1.57929100  | 0.87350300  |

|                                                                    |             |             |             |
|--------------------------------------------------------------------|-------------|-------------|-------------|
| C                                                                  | 3.44248500  | 3.79865800  | −2.25799900 |
| H                                                                  | 3.98622300  | 4.74570200  | −2.32566800 |
| H                                                                  | 3.39365200  | 3.36170200  | −3.25915100 |
| H                                                                  | 2.42086700  | 4.00260000  | −1.93228900 |
| C                                                                  | 4.00602800  | 4.74942500  | 0.42950400  |
| H                                                                  | 3.97506000  | 4.94930900  | 1.50487200  |
| H                                                                  | 4.87626500  | 5.26863500  | 0.01389800  |
| H                                                                  | 3.10150200  | 5.16757700  | −0.01770400 |
| O                                                                  | 3.39488000  | 1.59110200  | −1.30541700 |
| O                                                                  | 2.89650900  | 2.62743300  | 0.67054900  |
| B                                                                  | 2.56430400  | 1.62280100  | −0.21002000 |
| <b>7Ru</b>                                                         |             |             |             |
| $G_{\text{solv}} = -2554.902088; E_{\text{solv}} = -2555.86949078$ |             |             |             |
| C                                                                  | −1.33992300 | −1.10010200 | 3.30427900  |
| H                                                                  | −1.60054700 | −0.70069300 | 4.29121100  |
| C                                                                  | −0.04164700 | −1.95600300 | 3.44761300  |
| H                                                                  | 0.76967500  | −1.60615400 | 2.80275100  |
| H                                                                  | 0.32091200  | −1.90148400 | 4.48013700  |
| C                                                                  | −0.45159600 | −3.39748000 | 3.09743400  |
| H                                                                  | −0.30123300 | −3.57430300 | 2.02412000  |
| H                                                                  | 0.13450900  | −4.14574900 | 3.64056900  |
| C                                                                  | −1.94839800 | −3.45028900 | 3.41173600  |
| H                                                                  | −2.10617400 | −3.52104000 | 4.49603000  |
| H                                                                  | −2.45874500 | −4.29814600 | 2.94269400  |
| C                                                                  | −2.44360200 | −2.09901500 | 2.88810800  |
| H                                                                  | −3.42701500 | −1.81120300 | 3.27424600  |
| H                                                                  | −2.52400000 | −2.15981600 | 1.79748100  |
| C                                                                  | −0.18265200 | 1.51057100  | 3.31529700  |
| H                                                                  | −0.67081100 | 1.44803900  | 4.29890500  |
| C                                                                  | 1.30527500  | 1.17906200  | 3.49705500  |
| H                                                                  | 1.47199300  | 0.29277000  | 4.11690300  |
| H                                                                  | 1.76337600  | 1.00724000  | 2.51837400  |
| C                                                                  | 1.87148200  | 2.45424700  | 4.13554900  |
| H                                                                  | 1.69145600  | 2.43165000  | 5.21777500  |
| H                                                                  | 2.95403600  | 2.54790300  | 3.99303500  |
| C                                                                  | 1.08713000  | 3.61648700  | 3.48916900  |
| H                                                                  | 1.67976600  | 4.09745300  | 2.70661200  |
| H                                                                  | 0.83432500  | 4.38373000  | 4.22839700  |
| C                                                                  | −0.17965000 | 2.98553300  | 2.86339300  |
| H                                                                  | −0.11019100 | 3.04441700  | 1.77448800  |
| H                                                                  | −1.09711100 | 3.50241200  | 3.16182500  |
| C                                                                  | −2.77989900 | 1.22853700  | 2.19289800  |
| H                                                                  | −2.55471400 | 2.20007900  | 1.73525200  |
| C                                                                  | −3.42815300 | 1.49881000  | 3.56527000  |
| H                                                                  | −3.40091900 | 0.60189600  | 4.19830400  |
| H                                                                  | −2.93408200 | 2.30711700  | 4.11394500  |
| C                                                                  | −4.88097000 | 1.81725000  | 3.20321500  |
| H                                                                  | −5.55654100 | 1.78548000  | 4.06435900  |
| H                                                                  | −4.93929700 | 2.82390300  | 2.76965300  |
| C                                                                  | −5.21071400 | 0.76303500  | 2.13960300  |
| H                                                                  | −6.05352200 | 1.05140200  | 1.50381800  |
| H                                                                  | −5.48619300 | −0.17668700 | 2.63500700  |
| C                                                                  | −3.90261300 | 0.57290400  | 1.33659600  |
| H                                                                  | −3.94998800 | 1.06418400  | 0.36083500  |
| H                                                                  | −3.71861000 | −0.48494800 | 1.14004800  |
| C                                                                  | −0.26959500 | −0.47886000 | −3.64704000 |
| H                                                                  | −0.52212000 | −1.22970600 | −4.40488100 |
| C                                                                  | 1.01957900  | 0.22101800  | −4.11885300 |

|    |             |             |             |
|----|-------------|-------------|-------------|
| H  | 1.71573200  | −0.47957000 | −4.59335000 |
| H  | 1.53523600  | 0.69928800  | −3.28298900 |
| C  | 0.49755500  | 1.29788800  | −5.07454700 |
| H  | 1.24835000  | 2.06163400  | −5.30640600 |
| H  | 0.17871600  | 0.84558400  | −6.02373000 |
| C  | −0.71280800 | 1.85803500  | −4.32029800 |
| H  | −0.36257400 | 2.55347700  | −3.54757000 |
| H  | −1.40818100 | 2.40793300  | −4.96255000 |
| C  | −1.36779500 | 0.62602600  | −3.65705300 |
| H  | −2.23669500 | 0.28651100  | −4.23192200 |
| H  | −1.72465300 | 0.86728300  | −2.65067200 |
| C  | −1.67868800 | −2.50862800 | −2.28011000 |
| H  | −2.48789300 | −1.78021900 | −2.42380800 |
| C  | −2.08581000 | −3.42537900 | −1.08372400 |
| H  | −1.29700100 | −3.52934200 | −0.33631900 |
| H  | −2.94655800 | −2.98839400 | −0.56687500 |
| C  | −2.44922400 | −4.79404900 | −1.69625400 |
| H  | −1.59520000 | −5.47859800 | −1.61742600 |
| H  | −3.29335200 | −5.26992200 | −1.18732400 |
| C  | −2.72525100 | −4.49831400 | −3.17271600 |
| H  | −3.72996400 | −4.07184300 | −3.29195200 |
| H  | −2.66221500 | −5.38576600 | −3.81080000 |
| C  | −1.67063000 | −3.44155700 | −3.51179200 |
| H  | −1.88996500 | −2.91199800 | −4.44369000 |
| H  | −0.69587900 | −3.93145300 | −3.63065100 |
| C  | 1.27329700  | −2.51927100 | −2.24483800 |
| H  | 1.22932400  | −2.91483300 | −3.26672000 |
| C  | 2.63942900  | −1.79412700 | −2.04010100 |
| H  | 3.22224100  | −1.85042000 | −2.96680100 |
| H  | 2.53405700  | −0.73551500 | −1.79638300 |
| C  | 3.35315800  | −2.56186300 | −0.91432100 |
| H  | 4.44399600  | −2.52760200 | −1.00772400 |
| H  | 3.08830100  | −2.12359400 | 0.05725300  |
| C  | 2.77767500  | −3.97671000 | −1.00427100 |
| H  | 2.95384300  | −4.57704200 | −0.10523300 |
| H  | 3.21649400  | −4.51088400 | −1.85770000 |
| C  | 1.29095400  | −3.70645400 | −1.25180300 |
| H  | 0.83432700  | −3.41248200 | −0.29935400 |
| H  | 0.74148100  | −4.57496000 | −1.62967300 |
| P  | −1.12913100 | 0.37607600  | 2.19119100  |
| P  | −0.19265500 | −1.40109700 | −2.03704900 |
| Ru | −0.39704300 | −0.25098400 | 0.02035600  |
| H  | 0.14969600  | −1.56363500 | 0.65860700  |
| H  | 0.10333700  | 3.82007000  | −0.71954700 |
| H  | −1.93016800 | −0.31966200 | −0.32470400 |
| H  | −1.28525600 | −1.46410300 | 0.36144000  |
| C  | −0.59732900 | 2.97398100  | −0.76864900 |
| O  | 0.00112900  | 1.79549400  | −0.74600400 |
| O  | −1.79617800 | 3.11094800  | −0.84695400 |
| C  | 3.37606700  | 2.41156800  | −1.32133700 |
| C  | 3.35702200  | 2.66453400  | 0.22531000  |
| H  | 1.34843200  | 0.32562100  | 0.18164200  |
| C  | 4.67877000  | 1.83093700  | −1.85987900 |
| H  | 4.59794600  | 1.68654800  | −2.94217000 |
| H  | 5.52024000  | 2.50660300  | −1.66989500 |
| H  | 4.89842900  | 0.86039600  | −1.40937500 |
| C  | 4.16319600  | 1.61368900  | 0.99665100  |
| H  | 5.23932100  | 1.73220500  | 0.83529700  |

|                                                                    |             |             |             |
|--------------------------------------------------------------------|-------------|-------------|-------------|
| H                                                                  | 3.96573100  | 1.72813400  | 2.06611200  |
| H                                                                  | 3.87887500  | 0.59760500  | 0.70555100  |
| C                                                                  | 2.99194700  | 3.65173200  | -2.13435600 |
| H                                                                  | 3.78756700  | 4.40397500  | -2.13292700 |
| H                                                                  | 2.80534500  | 3.35170600  | -3.16997900 |
| H                                                                  | 2.07932700  | 4.11673500  | -1.75091200 |
| C                                                                  | 3.79642700  | 4.06045800  | 0.64545000  |
| H                                                                  | 3.81082000  | 4.13666400  | 1.73709000  |
| H                                                                  | 4.80804500  | 4.27325900  | 0.28235900  |
| H                                                                  | 3.11894600  | 4.82642900  | 0.26039400  |
| O                                                                  | 2.34761400  | 1.43566100  | -1.47349900 |
| O                                                                  | 1.97163100  | 2.49458500  | 0.53832000  |
| B                                                                  | 1.45046600  | 1.52664800  | -0.37006500 |
| <b>TS<sub>7,8-Ru</sub></b>                                         |             |             |             |
| $G_{\text{solv}} = -2554.882555; E_{\text{solv}} = -2555.84640032$ |             |             |             |
| C                                                                  | -2.03531900 | -0.96797600 | 3.17291900  |
| H                                                                  | -2.22850800 | -0.49845900 | 4.14552700  |
| C                                                                  | -1.20227300 | -2.26388500 | 3.41637500  |
| H                                                                  | -0.34132000 | -2.33130900 | 2.74423900  |
| H                                                                  | -0.81178000 | -2.27017200 | 4.43955100  |
| C                                                                  | -2.17410400 | -3.44159200 | 3.18464200  |
| H                                                                  | -2.03415400 | -3.84278500 | 2.17279400  |
| H                                                                  | -2.01097700 | -4.26579500 | 3.88618500  |
| C                                                                  | -3.57228100 | -2.82513400 | 3.29464300  |
| H                                                                  | -3.84935800 | -2.69591200 | 4.34924600  |
| H                                                                  | -4.34898600 | -3.43265500 | 2.81858900  |
| C                                                                  | -3.39228400 | -1.45769300 | 2.62870100  |
| H                                                                  | -4.20501200 | -0.75711800 | 2.84699100  |
| H                                                                  | -3.35738100 | -1.59301500 | 1.54133800  |
| C                                                                  | 0.09451900  | 0.88429100  | 3.44056500  |
| H                                                                  | -0.41133400 | 0.82378000  | 4.41587700  |
| C                                                                  | 1.39120700  | 0.06136200  | 3.49780800  |
| H                                                                  | 1.25124100  | -0.93609600 | 3.92488000  |
| H                                                                  | 1.76798800  | -0.06810900 | 2.47677400  |
| C                                                                  | 2.35306900  | 0.92888900  | 4.33075400  |
| H                                                                  | 2.29782000  | 0.64604800  | 5.38786200  |
| H                                                                  | 3.39393800  | 0.78653200  | 4.01988300  |
| C                                                                  | 1.87205500  | 2.39166100  | 4.14184100  |
| H                                                                  | 2.64241400  | 3.02603800  | 3.68889000  |
| H                                                                  | 1.62551700  | 2.83947600  | 5.11069500  |
| C                                                                  | 0.61788700  | 2.31455000  | 3.24657900  |
| H                                                                  | 0.89429300  | 2.46542800  | 2.19919600  |
| H                                                                  | -0.12413600 | 3.07627800  | 3.50906000  |
| C                                                                  | -2.30272700 | 1.72785100  | 2.04879400  |
| H                                                                  | -1.66542900 | 2.57153900  | 1.75228800  |
| C                                                                  | -3.07464300 | 2.16733400  | 3.30335300  |
| H                                                                  | -3.53501000 | 1.30643300  | 3.80431200  |
| H                                                                  | -2.43771100 | 2.67608100  | 4.03482700  |
| C                                                                  | -4.17094300 | 3.06405700  | 2.71950000  |
| H                                                                  | -4.98204300 | 3.26775400  | 3.42630900  |
| H                                                                  | -3.73759500 | 4.02755800  | 2.42286000  |
| C                                                                  | -4.64149600 | 2.29200800  | 1.47644300  |
| H                                                                  | -5.07946700 | 2.94955800  | 0.72011300  |
| H                                                                  | -5.41338200 | 1.56794700  | 1.76475800  |
| C                                                                  | -3.38725300 | 1.54938200  | 0.95058900  |
| H                                                                  | -3.04036300 | 1.96802000  | 0.00096100  |
| H                                                                  | -3.61171600 | 0.49467700  | 0.76745500  |
| C                                                                  | -0.60424400 | -0.79865200 | -3.54385500 |

|    |             |             |             |
|----|-------------|-------------|-------------|
| H  | -0.58184200 | -1.55703600 | -4.33542100 |
| C  | 0.25415400  | 0.39695200  | -3.99945700 |
| H  | 1.11004100  | 0.08015700  | -4.60535200 |
| H  | 0.64960700  | 0.94758800  | -3.14292100 |
| C  | -0.72906900 | 1.28720700  | -4.76527200 |
| H  | -0.35753300 | 2.30930800  | -4.89478300 |
| H  | -0.92356200 | 0.87000200  | -5.76298300 |
| C  | -1.99352500 | 1.22111500  | -3.90340300 |
| H  | -1.87829400 | 1.89587600  | -3.04855900 |
| H  | -2.89892900 | 1.51964000  | -4.44192300 |
| C  | -2.05505000 | -0.24136500 | -3.41369000 |
| H  | -2.74173400 | -0.83659200 | -4.02608400 |
| H  | -2.42993800 | -0.29300300 | -2.38247800 |
| C  | -1.07093100 | -3.18117000 | -2.09847500 |
| H  | -2.09547200 | -2.79047700 | -2.16112400 |
| C  | -1.01709200 | -4.15108800 | -0.87575700 |
| H  | -0.19357200 | -3.93070100 | -0.19204400 |
| H  | -1.93883300 | -4.05297500 | -0.29224500 |
| C  | -0.90135600 | -5.57254400 | -1.46345300 |
| H  | 0.14863100  | -5.89094900 | -1.47729300 |
| H  | -1.45592400 | -6.31372800 | -0.87932700 |
| C  | -1.40776700 | -5.43795300 | -2.90244600 |
| H  | -2.50545900 | -5.40884200 | -2.91567800 |
| H  | -1.08844700 | -6.25974500 | -3.55176800 |
| C  | -0.84772200 | -4.08000800 | -3.33497200 |
| H  | -1.33444200 | -3.68666000 | -4.23271600 |
| H  | 0.22100600  | -4.18746400 | -3.55895400 |
| C  | 1.67825100  | -2.17203300 | -2.34688500 |
| H  | 1.68337000  | -2.57025600 | -3.36965800 |
| C  | 2.72413800  | -1.02775300 | -2.24487200 |
| H  | 3.02530800  | -0.69767800 | -3.24412800 |
| H  | 2.30920500  | -0.15380100 | -1.73741800 |
| C  | 3.92324000  | -1.61362400 | -1.46172400 |
| H  | 4.88898300  | -1.30460800 | -1.87622500 |
| H  | 3.88944600  | -1.27068100 | -0.41999300 |
| C  | 3.72043600  | -3.13201800 | -1.49764600 |
| H  | 4.25049200  | -3.65569800 | -0.69511000 |
| H  | 4.07112800  | -3.54175200 | -2.45429800 |
| C  | 2.20021900  | -3.26874400 | -1.39759100 |
| H  | 1.88822800  | -3.05498300 | -0.36726500 |
| H  | 1.83352900  | -4.26563900 | -1.66264200 |
| P  | -1.12202300 | 0.30448600  | 2.16157600  |
| P  | -0.05026900 | -1.61985000 | -1.97570900 |
| Ru | -0.47764900 | -0.47924600 | 0.04154600  |
| H  | 0.68494200  | -1.28319700 | 0.68415600  |
| H  | -0.38943100 | 4.29020000  | 0.33136200  |
| H  | -1.78811100 | -1.51681600 | 0.14915900  |
| H  | -1.05496900 | -1.92609500 | 0.56319400  |
| C  | -0.96942600 | 3.83355000  | -0.48484000 |
| O  | -0.33159300 | 2.86909100  | -1.14357900 |
| O  | -2.08826600 | 4.18451400  | -0.77401400 |
| C  | 3.14961200  | 2.90416800  | -1.50956200 |
| C  | 3.06117900  | 2.96565800  | 0.05307200  |
| H  | 0.63757900  | 0.78669400  | -0.23951500 |
| C  | 4.31095600  | 2.08499600  | -2.04781800 |
| H  | 4.26442800  | 2.05137600  | -3.14046800 |
| H  | 5.26270600  | 2.54572800  | -1.76208800 |
| H  | 4.29561600  | 1.06143300  | -1.67528700 |

|                                                                    |             |             |             |
|--------------------------------------------------------------------|-------------|-------------|-------------|
| C                                                                  | 3.49785400  | 1.66626300  | 0.72795700  |
| H                                                                  | 4.57757100  | 1.51521800  | 0.63408700  |
| H                                                                  | 3.25486200  | 1.72220700  | 1.79134000  |
| H                                                                  | 2.97469800  | 0.80390200  | 0.30706500  |
| C                                                                  | 3.14051500  | 4.28771200  | −2.16399600 |
| H                                                                  | 4.08493600  | 4.81649100  | −2.00230100 |
| H                                                                  | 2.99318100  | 4.16742400  | −3.24109000 |
| H                                                                  | 2.32458000  | 4.90840300  | −1.78049400 |
| C                                                                  | 3.76826400  | 4.15326400  | 0.68672000  |
| H                                                                  | 3.64459100  | 4.11857400  | 1.77348700  |
| H                                                                  | 4.84084400  | 4.12350600  | 0.46747500  |
| H                                                                  | 3.36371100  | 5.10307100  | 0.33042700  |
| O                                                                  | 1.90076500  | 2.26757200  | −1.85900200 |
| O                                                                  | 1.63855000  | 3.11867800  | 0.25555000  |
| B                                                                  | 1.01498100  | 2.54439500  | −0.83563500 |
| <b>8Ru</b>                                                         |             |             |             |
| $G_{\text{solv}} = -2554.897573; E_{\text{solv}} = -2555.85685161$ |             |             |             |
| C                                                                  | −2.04609700 | −1.14278400 | 3.48445300  |
| H                                                                  | −2.16125800 | −0.61146700 | 4.43749800  |
| C                                                                  | −1.17860800 | −2.41681500 | 3.72907800  |
| H                                                                  | −0.33768600 | −2.48295800 | 3.03205300  |
| H                                                                  | −0.76018800 | −2.39321600 | 4.74100200  |
| C                                                                  | −2.13265500 | −3.61754900 | 3.56032600  |
| H                                                                  | −2.05619300 | −4.01004600 | 2.53809400  |
| H                                                                  | −1.89929400 | −4.43968400 | 4.24451700  |
| C                                                                  | −3.53177900 | −3.03222700 | 3.77219900  |
| H                                                                  | −3.72623100 | −2.88961300 | 4.84351600  |
| H                                                                  | −4.32978000 | −3.66492500 | 3.36946900  |
| C                                                                  | −3.43328800 | −1.67593100 | 3.06858100  |
| H                                                                  | −4.24120300 | −0.98507800 | 3.33133900  |
| H                                                                  | −3.47670700 | −1.83831200 | 1.98508800  |
| C                                                                  | 0.03361200  | 0.80805800  | 3.37741600  |
| H                                                                  | −0.44343500 | 1.00504800  | 4.34933700  |
| C                                                                  | 1.28570400  | −0.06172500 | 3.59796200  |
| H                                                                  | 1.11299200  | −0.87409200 | 4.30944100  |
| H                                                                  | 1.57152000  | −0.51628200 | 2.64249500  |
| C                                                                  | 2.38466900  | 0.91869000  | 4.07820700  |
| H                                                                  | 2.59010100  | 0.79629200  | 5.14661500  |
| H                                                                  | 3.32650000  | 0.72684700  | 3.55239400  |
| C                                                                  | 1.84431700  | 2.33830300  | 3.78063700  |
| H                                                                  | 2.59583500  | 2.99727700  | 3.33178400  |
| H                                                                  | 1.51431900  | 2.81887500  | 4.70942200  |
| C                                                                  | 0.63493100  | 2.12131400  | 2.86104500  |
| H                                                                  | 0.96427600  | 1.98276200  | 1.82371800  |
| H                                                                  | −0.06507400 | 2.96353700  | 2.89125500  |
| C                                                                  | −2.48389000 | 1.43877700  | 2.14258000  |
| H                                                                  | −1.89368200 | 2.25626000  | 1.71330600  |
| C                                                                  | −3.14931000 | 1.98322900  | 3.41929300  |
| H                                                                  | −3.48857000 | 1.16759800  | 4.07024400  |
| H                                                                  | −2.47370400 | 2.61555700  | 4.00562600  |
| C                                                                  | −4.36638500 | 2.73773900  | 2.87421000  |
| H                                                                  | −5.10778000 | 2.97260100  | 3.64524500  |
| H                                                                  | −4.04165100 | 3.68375500  | 2.42214700  |
| C                                                                  | −4.90584300 | 1.79445200  | 1.79069400  |
| H                                                                  | −5.53472800 | 2.30845600  | 1.05755100  |
| H                                                                  | −5.52183800 | 1.01710100  | 2.26037000  |
| C                                                                  | −3.65010400 | 1.15965600  | 1.14946600  |
| H                                                                  | −3.42162700 | 1.61931000  | 0.18289000  |

|    |             |             |             |
|----|-------------|-------------|-------------|
| H  | -3.79922100 | 0.09155200  | 0.96623100  |
| C  | -0.59584000 | -0.82334700 | -3.34552000 |
| H  | -0.43964300 | -1.45903900 | -4.22613400 |
| C  | 0.21536300  | 0.47122200  | -3.53551000 |
| H  | 1.18261000  | 0.29596100  | -4.01629800 |
| H  | 0.40767700  | 0.94098900  | -2.56566700 |
| C  | -0.71722800 | 1.36819500  | -4.35136200 |
| H  | -0.41128400 | 2.41882000  | -4.33421400 |
| H  | -0.73952700 | 1.03662900  | -5.39877100 |
| C  | -2.07803300 | 1.13584600  | -3.68670600 |
| H  | -2.14230300 | 1.75245700  | -2.78328700 |
| H  | -2.92261200 | 1.40809000  | -4.32796500 |
| C  | -2.08403700 | -0.36258000 | -3.30520600 |
| H  | -2.68311400 | -0.95348500 | -4.00670900 |
| H  | -2.53119800 | -0.50827900 | -2.31229100 |
| C  | -1.09665200 | -3.37772300 | -2.21767100 |
| H  | -2.12585400 | -3.01120200 | -2.32883600 |
| C  | -1.10418800 | -4.45696600 | -1.09005700 |
| H  | -0.34971600 | -4.27337400 | -0.32114300 |
| H  | -2.07284200 | -4.44565400 | -0.57944400 |
| C  | -0.87806900 | -5.80936500 | -1.79627700 |
| H  | 0.18408900  | -6.08246000 | -1.75424000 |
| H  | -1.44054600 | -6.62536500 | -1.33145300 |
| C  | -1.27646000 | -5.55571900 | -3.25346600 |
| H  | -2.37007800 | -5.56265600 | -3.35257600 |
| H  | -0.87417100 | -6.30066000 | -3.94794100 |
| C  | -0.74003700 | -4.14423900 | -3.51012400 |
| H  | -1.16780500 | -3.67872300 | -4.40378400 |
| H  | 0.34648600  | -4.19680100 | -3.65388600 |
| C  | 1.62255200  | -2.26795600 | -2.14127300 |
| H  | 1.70311200  | -2.59228700 | -3.18590300 |
| C  | 2.61501600  | -1.09010200 | -1.90920600 |
| H  | 3.08265800  | -0.80932000 | -2.85940300 |
| H  | 2.11157500  | -0.20113100 | -1.52202400 |
| C  | 3.66654000  | -1.61676100 | -0.91393900 |
| H  | 4.66094800  | -1.18708100 | -1.07990100 |
| H  | 3.36137900  | -1.36344700 | 0.10941700  |
| C  | 3.62769900  | -3.13687500 | -1.08884600 |
| H  | 4.08211800  | -3.67982400 | -0.25329100 |
| H  | 4.15542000  | -3.42845400 | -2.00706700 |
| C  | 2.12777200  | -3.40837200 | -1.22938000 |
| H  | 1.66416900  | -3.33132900 | -0.23824200 |
| H  | 1.89618800  | -4.39953900 | -1.63336400 |
| P  | -1.26290000 | 0.04783700  | 2.28665000  |
| P  | -0.15065500 | -1.81357800 | -1.84217400 |
| Ru | -0.71543100 | -0.84264000 | 0.20839800  |
| H  | 0.51015000  | -1.56832200 | 0.83394700  |
| H  | -0.24678500 | 3.15303400  | 0.40267700  |
| H  | -1.96864600 | -2.00012000 | 0.34140100  |
| H  | -1.23129400 | -2.34054200 | 0.74805800  |
| C  | -0.68271900 | 3.32696400  | -0.58984700 |
| O  | 0.21196800  | 3.31568200  | -1.59337600 |
| O  | -1.85352200 | 3.51718200  | -0.78767800 |
| C  | 3.77421600  | 3.12974000  | -1.76044700 |
| C  | 3.52322400  | 3.15679500  | -0.20547200 |
| H  | 0.31049200  | 0.44089100  | -0.07362500 |
| C  | 4.72177300  | 2.03780700  | -2.22675400 |
| H  | 4.81743100  | 2.07383400  | -3.31579100 |

|                                                                    |             |             |             |
|--------------------------------------------------------------------|-------------|-------------|-------------|
| H                                                                  | 5.71646800  | 2.18247900  | −1.79248600 |
| H                                                                  | 4.35827100  | 1.04770700  | −1.94912600 |
| C                                                                  | 3.62104400  | 1.78222200  | 0.45025500  |
| H                                                                  | 4.64586600  | 1.40107400  | 0.42526800  |
| H                                                                  | 3.31480700  | 1.86511800  | 1.49486800  |
| H                                                                  | 2.95945200  | 1.05795800  | −0.03070100 |
| C                                                                  | 4.19630500  | 4.48264600  | −2.33112000 |
| H                                                                  | 5.21399000  | 4.74428500  | −2.02702000 |
| H                                                                  | 4.16767700  | 4.43009800  | −3.42307700 |
| H                                                                  | 3.52145100  | 5.28407100  | −2.01464200 |
| C                                                                  | 4.36517900  | 4.16868100  | 0.55390500  |
| H                                                                  | 4.11646000  | 4.12996100  | 1.61827300  |
| H                                                                  | 5.42964300  | 3.93511200  | 0.44761500  |
| H                                                                  | 4.19338800  | 5.18805100  | 0.20277600  |
| O                                                                  | 2.45046400  | 2.85009000  | −2.28830200 |
| O                                                                  | 2.12786000  | 3.56245000  | −0.12806700 |
| B                                                                  | 1.56931800  | 3.22691200  | −1.32638600 |
| <b>9<sub>Ru</sub></b>                                              |             |             |             |
| $G_{\text{solv}} = -2554.886694; E_{\text{solv}} = -2555.85192620$ |             |             |             |
| C                                                                  | −2.55791900 | −1.17665900 | 2.79986700  |
| H                                                                  | −2.59857700 | −1.43148000 | 3.86759000  |
| C                                                                  | −3.09412000 | −2.39084200 | 1.98704100  |
| H                                                                  | −2.49262400 | −2.56233300 | 1.09070000  |
| H                                                                  | −3.04449000 | −3.30284800 | 2.58980100  |
| C                                                                  | −4.55496500 | −2.04242900 | 1.61115100  |
| H                                                                  | −4.60585400 | −1.75826100 | 0.55377700  |
| H                                                                  | −5.23754600 | −2.88602800 | 1.75487600  |
| C                                                                  | −4.91778400 | −0.83350000 | 2.48170300  |
| H                                                                  | −5.21727700 | −1.16031600 | 3.48651600  |
| H                                                                  | −5.73676600 | −0.23506400 | 2.06859200  |
| C                                                                  | −3.59725100 | −0.06473600 | 2.56348500  |
| H                                                                  | −3.58430000 | 0.69863600  | 3.34836800  |
| H                                                                  | −3.42240900 | 0.43736100  | 1.60516000  |
| C                                                                  | 0.08541100  | −1.92562400 | 3.58684600  |
| H                                                                  | −0.32971800 | −1.72559200 | 4.58263800  |
| C                                                                  | −0.13534200 | −3.42034300 | 3.26078900  |
| H                                                                  | −1.03585000 | −3.81673600 | 3.74073600  |
| H                                                                  | −0.24161200 | −3.56206300 | 2.17953600  |
| C                                                                  | 1.14803900  | −4.10716000 | 3.74017200  |
| H                                                                  | 1.13322700  | −4.22213300 | 4.83252300  |
| H                                                                  | 1.28569500  | −5.10110700 | 3.30140100  |
| C                                                                  | 2.23764100  | −3.11350400 | 3.33085300  |
| H                                                                  | 2.41722400  | −3.20155400 | 2.25196500  |
| H                                                                  | 3.19270600  | −3.27981500 | 3.84023500  |
| C                                                                  | 1.63122700  | −1.73367800 | 3.64411000  |
| H                                                                  | 1.99019900  | −0.97725900 | 2.93955900  |
| H                                                                  | 1.92454300  | −1.40520200 | 4.64800300  |
| C                                                                  | −0.46032800 | 0.83812400  | 3.35165800  |
| H                                                                  | 0.63768300  | 0.88077300  | 3.36080200  |
| C                                                                  | −0.95810500 | 0.95486500  | 4.81903500  |
| H                                                                  | −1.80118000 | 0.28821700  | 5.02717300  |
| H                                                                  | −0.16010000 | 0.67541900  | 5.51476700  |
| C                                                                  | −1.37690200 | 2.43511500  | 5.00492900  |
| H                                                                  | −2.47069400 | 2.51655400  | 4.99998900  |
| H                                                                  | −1.02819200 | 2.85384700  | 5.95413400  |
| C                                                                  | −0.80980000 | 3.17204600  | 3.78255000  |
| H                                                                  | 0.24694300  | 3.42394000  | 3.94588600  |
| H                                                                  | −1.34429100 | 4.10314100  | 3.56380500  |

|    |             |             |             |
|----|-------------|-------------|-------------|
| C  | -0.92517300 | 2.13372200  | 2.66368300  |
| H  | -0.33126900 | 2.36146900  | 1.77600500  |
| H  | -1.97328800 | 2.06747300  | 2.34847000  |
| C  | 0.98150800  | -0.48880900 | -3.31660500 |
| H  | 1.73727800  | -0.87775000 | -4.01317800 |
| C  | 1.06712600  | 1.04287600  | -3.36049800 |
| H  | 2.09708700  | 1.41146700  | -3.32813400 |
| H  | 0.53623600  | 1.46858100  | -2.50158200 |
| C  | 0.35544300  | 1.39453200  | -4.67083100 |
| H  | 0.03552600  | 2.44035500  | -4.70881000 |
| H  | 1.04236500  | 1.22185300  | -5.50969600 |
| C  | -0.82950400 | 0.41358000  | -4.74179100 |
| H  | -1.72705300 | 0.88168300  | -4.32697200 |
| H  | -1.05837100 | 0.12962100  | -5.77414600 |
| C  | -0.42530700 | -0.80845000 | -3.87573100 |
| H  | -0.41415400 | -1.73937000 | -4.45284400 |
| H  | -1.13931100 | -0.94408700 | -3.05697400 |
| C  | 1.30026500  | -3.06748800 | -2.20510400 |
| H  | 0.26085400  | -3.19954300 | -2.53224500 |
| C  | 1.57352200  | -4.12533900 | -1.09173900 |
| H  | 2.00075200  | -3.68993300 | -0.18690100 |
| H  | 0.62882200  | -4.58437900 | -0.78581000 |
| C  | 2.52347200  | -5.16580200 | -1.72033100 |
| H  | 3.56250900  | -4.94066700 | -1.44615200 |
| H  | 2.31326700  | -6.18550600 | -1.38171300 |
| C  | 2.35277000  | -4.98682200 | -3.23204400 |
| H  | 1.42888100  | -5.47577100 | -3.56853300 |
| H  | 3.18147100  | -5.40377300 | -3.81424700 |
| C  | 2.21796200  | -3.46875300 | -3.37999800 |
| H  | 1.81111200  | -3.16860800 | -4.35114000 |
| H  | 3.21030600  | -3.00919800 | -3.28087100 |
| C  | 3.12184800  | -0.86408600 | -1.45921400 |
| H  | 3.59725800  | -1.02173200 | -2.43511600 |
| C  | 3.37115800  | 0.61440500  | -1.02162900 |
| H  | 3.89586900  | 1.15080200  | -1.82043200 |
| H  | 2.44048700  | 1.15182000  | -0.81913800 |
| C  | 4.25336500  | 0.53773200  | 0.23759200  |
| H  | 4.93453000  | 1.39071200  | 0.32676700  |
| H  | 3.61725200  | 0.52508700  | 1.13229700  |
| C  | 4.97497800  | -0.80624400 | 0.11199800  |
| H  | 5.40277000  | -1.15794700 | 1.05701700  |
| H  | 5.79058800  | -0.73259300 | -0.62008300 |
| C  | 3.86755500  | -1.72335800 | -0.41403300 |
| H  | 3.20102500  | -1.97191700 | 0.41878500  |
| H  | 4.23905100  | -2.66273100 | -0.83715100 |
| P  | -0.77933000 | -0.74693500 | 2.43291800  |
| P  | 1.31846100  | -1.28273700 | -1.67224000 |
| Ru | 0.04109600  | -0.85171500 | 0.24269400  |
| H  | 1.33210200  | -0.23460500 | 0.86265400  |
| H  | 0.22541800  | 0.80280800  | 0.03589200  |
| H  | -0.43113600 | -2.42145500 | 0.20513700  |
| H  | 1.06427800  | -1.85090800 | 0.84399400  |
| C  | -1.00497500 | 4.91727500  | -2.32813900 |
| C  | -0.50435500 | 4.65090400  | -0.85944400 |
| C  | 0.04877200  | 5.49333900  | -3.25961300 |
| H  | -0.37710100 | 5.63132500  | -4.25757700 |
| H  | 0.38814700  | 6.46925300  | -2.89706900 |
| H  | 0.91344300  | 4.83273100  | -3.34826500 |

|                                                                    |             |             |             |
|--------------------------------------------------------------------|-------------|-------------|-------------|
| C                                                                  | 0.97616600  | 4.27941000  | −0.78115200 |
| H                                                                  | 1.61338800  | 5.14677100  | −0.97713100 |
| H                                                                  | 1.19602900  | 3.90682800  | 0.22293900  |
| H                                                                  | 1.23367800  | 3.48885700  | −1.49233200 |
| C                                                                  | −2.28741800 | 5.74427500  | −2.38954800 |
| H                                                                  | −2.10101000 | 6.78722800  | −2.11754100 |
| H                                                                  | −2.67689700 | 5.72049600  | −3.41108400 |
| H                                                                  | −3.05862000 | 5.34347500  | −1.72443700 |
| C                                                                  | −0.83017500 | 5.74984400  | 0.13690200  |
| H                                                                  | −0.44765500 | 5.47528400  | 1.12394300  |
| H                                                                  | −0.35355200 | 6.68889700  | −0.16226100 |
| H                                                                  | −1.90606200 | 5.91493200  | 0.22264400  |
| O                                                                  | −1.34210700 | 3.58075800  | −2.78882200 |
| O                                                                  | −1.24885400 | 3.45602400  | −0.49858500 |
| B                                                                  | −1.52914400 | 2.82842100  | −1.67434300 |
| O                                                                  | −1.94572900 | 1.51102700  | −1.76983400 |
| C                                                                  | −1.96938300 | 0.73541700  | −0.67505400 |
| H                                                                  | −2.03854800 | 1.27756200  | 0.27220200  |
| O                                                                  | −2.06793100 | −0.47729800 | −0.77851300 |
| <b>TS<sub>9,10-Ru</sub></b>                                        |             |             |             |
| $G_{\text{solv}} = -2554.885907; E_{\text{solv}} = -2555.85123331$ |             |             |             |
| C                                                                  | 10.62332500 | 4.25481200  | 7.98065700  |
| H                                                                  | 10.58448500 | 3.98940500  | 9.04597900  |
| C                                                                  | 10.10733500 | 3.04071700  | 7.15480600  |
| H                                                                  | 10.70620100 | 2.89445500  | 6.25229600  |
| H                                                                  | 10.17842600 | 2.12180800  | 7.74474400  |
| C                                                                  | 8.63811200  | 3.36606300  | 6.79010500  |
| H                                                                  | 8.57627600  | 3.65384800  | 5.73456800  |
| H                                                                  | 7.97117200  | 2.51024300  | 6.93502300  |
| C                                                                  | 8.25963700  | 4.56486900  | 7.66829300  |
| H                                                                  | 7.96697200  | 4.22847200  | 8.67198300  |
| H                                                                  | 7.43117700  | 5.15321600  | 7.25978700  |
| C                                                                  | 9.56847900  | 5.35335800  | 7.75163500  |
| H                                                                  | 9.57175800  | 6.11250000  | 8.54077600  |
| H                                                                  | 9.73426100  | 5.86248300  | 6.79560600  |
| C                                                                  | 13.27713800 | 3.53922500  | 8.76523700  |
| H                                                                  | 12.86456100 | 3.73673100  | 9.76252700  |
| C                                                                  | 13.06754200 | 2.04188000  | 8.44373100  |
| H                                                                  | 12.17449000 | 1.63850800  | 8.93158200  |
| H                                                                  | 12.95361800 | 1.89566500  | 7.36394900  |
| C                                                                  | 14.36093600 | 1.36773700  | 8.91424400  |
| H                                                                  | 14.35495400 | 1.25340300  | 10.00668800 |
| H                                                                  | 14.50484300 | 0.37485400  | 8.47517200  |
| C                                                                  | 15.43796200 | 2.37149300  | 8.49659600  |
| H                                                                  | 15.60923600 | 2.28560000  | 7.41621500  |
| H                                                                  | 16.39869000 | 2.21379200  | 8.99794700  |
| C                                                                  | 14.82125600 | 3.74519500  | 8.81596800  |
| H                                                                  | 15.17060900 | 4.50721300  | 8.11272100  |
| H                                                                  | 15.11584200 | 4.07290400  | 9.81972400  |
| C                                                                  | 12.69826400 | 6.29623700  | 8.54024200  |
| H                                                                  | 13.79592600 | 6.34924900  | 8.55064100  |
| C                                                                  | 12.19823400 | 6.40438900  | 10.00735100 |
| H                                                                  | 11.35729500 | 5.73349500  | 10.21051100 |
| H                                                                  | 12.99612400 | 6.12504500  | 10.70323400 |
| C                                                                  | 11.77305700 | 7.88238200  | 10.19818300 |
| H                                                                  | 10.67892000 | 7.95841000  | 10.19766500 |
| H                                                                  | 12.12349300 | 8.30024400  | 11.14710600 |
| C                                                                  | 12.33209500 | 8.62538400  | 8.97558100  |

|    |             |             |             |
|----|-------------|-------------|-------------|
| H  | 13.38760500 | 8.88404000  | 9.13656600  |
| H  | 11.79115200 | 9.55327600  | 8.75960900  |
| C  | 12.22052500 | 7.58843700  | 7.85518800  |
| H  | 12.80749700 | 7.82477900  | 6.96510500  |
| H  | 11.17161700 | 7.51311000  | 7.54501800  |
| C  | 14.15565600 | 4.97035700  | 1.84347200  |
| H  | 14.89330600 | 4.54160600  | 1.15128100  |
| C  | 14.30276700 | 6.49632400  | 1.76811400  |
| H  | 15.34825600 | 6.82010200  | 1.77330100  |
| H  | 13.80621000 | 6.96435400  | 2.62471400  |
| C  | 13.58126600 | 6.85135800  | 0.46425300  |
| H  | 13.30643500 | 7.90922900  | 0.40976500  |
| H  | 14.24232800 | 6.63015100  | −0.38421300 |
| C  | 12.35361700 | 5.92358100  | 0.44065600  |
| H  | 11.49637400 | 6.43327600  | 0.88987300  |
| H  | 12.07199200 | 5.64810500  | −0.58089800 |
| C  | 12.73518200 | 4.68791900  | 1.29686400  |
| H  | 12.72188000 | 3.76085400  | 0.71326800  |
| H  | 12.02451200 | 4.56421300  | 2.11998800  |
| C  | 14.44496300 | 2.40290200  | 2.98225400  |
| H  | 13.40404400 | 2.27753500  | 2.65683300  |
| C  | 14.71199300 | 1.35152400  | 4.10353100  |
| H  | 15.12938400 | 1.79239200  | 5.01014400  |
| H  | 13.76581800 | 0.89032000  | 4.40232100  |
| C  | 15.66755500 | 0.30903600  | 3.48798200  |
| H  | 16.70543000 | 0.54306100  | 3.75887100  |
| H  | 15.46270300 | −0.70748000 | 3.83915200  |
| C  | 15.49460300 | 0.46973900  | 1.97479800  |
| H  | 14.57061100 | −0.02402800 | 1.64571200  |
| H  | 16.32271600 | 0.04685400  | 1.39611500  |
| C  | 15.35848100 | 1.98578200  | 1.80883000  |
| H  | 14.94754100 | 2.27281100  | 0.83562200  |
| H  | 16.35092500 | 2.44727400  | 1.89782700  |
| C  | 16.28324300 | 4.60539800  | 3.71205000  |
| H  | 16.75537200 | 4.45559300  | 2.73329400  |
| C  | 16.53305700 | 6.08072800  | 4.16076300  |
| H  | 17.05996200 | 6.62258700  | 3.36724400  |
| H  | 15.60311500 | 6.61938500  | 4.36408400  |
| C  | 17.41353300 | 5.99410800  | 5.42029500  |
| H  | 18.09237900 | 6.84793300  | 5.51823700  |
| H  | 16.77703600 | 5.97064300  | 6.31441800  |
| C  | 18.13854700 | 4.65329100  | 5.28147100  |
| H  | 18.56760000 | 4.29352900  | 6.22286100  |
| H  | 18.95362800 | 4.73605900  | 4.54981500  |
| C  | 17.03311300 | 3.73835000  | 4.74738300  |
| H  | 16.36955800 | 3.47919100  | 5.57896900  |
| H  | 17.40634500 | 2.80422200  | 4.31460900  |
| P  | 12.39440400 | 4.71096400  | 7.61915400  |
| P  | 14.47857300 | 4.19305800  | 3.49755000  |
| Ru | 13.19785600 | 4.63320300  | 5.42088200  |
| H  | 14.45770800 | 5.34698900  | 6.01987200  |
| H  | 13.18425300 | 6.29571200  | 5.11462300  |
| H  | 12.86559400 | 3.04266600  | 5.45506600  |
| H  | 14.29881100 | 3.72329700  | 6.03799300  |
| C  | 12.21725100 | 10.32156100 | 2.85967400  |
| C  | 12.74593300 | 10.08194600 | 4.32293800  |
| C  | 13.23930700 | 10.92524600 | 1.90992600  |
| H  | 12.79589300 | 11.04321300 | 0.91697200  |

|                                                                    |             |             |            |
|--------------------------------------------------------------------|-------------|-------------|------------|
| H                                                                  | 13.55291300 | 11.91381500 | 2.26145400 |
| H                                                                  | 14.12322000 | 10.29161000 | 1.81302100 |
| C                                                                  | 14.23961100 | 9.76150400  | 4.38398300 |
| H                                                                  | 14.84628900 | 10.64889900 | 4.18038600 |
| H                                                                  | 14.48252800 | 9.39789200  | 5.38622000 |
| H                                                                  | 14.51498700 | 8.97932900  | 3.67011300 |
| C                                                                  | 10.91003700 | 11.11027900 | 2.81249200 |
| H                                                                  | 11.06839400 | 12.15998900 | 3.07655200 |
| H                                                                  | 10.50634600 | 11.06875900 | 1.79699800 |
| H                                                                  | 10.16140300 | 10.68944000 | 3.49084400 |
| C                                                                  | 12.39811500 | 11.17722500 | 5.31667600 |
| H                                                                  | 12.80354800 | 10.92313500 | 6.30016300 |
| H                                                                  | 12.83737700 | 12.13023100 | 5.00449600 |
| H                                                                  | 11.31850100 | 11.30563300 | 5.41738100 |
| O                                                                  | 11.91545600 | 8.97473600  | 2.41324400 |
| O                                                                  | 12.04811400 | 8.86810400  | 4.70206600 |
| B                                                                  | 11.76317100 | 8.21896600  | 3.53555800 |
| O                                                                  | 11.37793300 | 6.90029500  | 3.45673300 |
| C                                                                  | 11.33485900 | 6.12993900  | 4.57442300 |
| H                                                                  | 11.09463900 | 6.68386000  | 5.48531200 |
| O                                                                  | 11.15769900 | 4.91073100  | 4.45226800 |
| <b>10Ru</b>                                                        |             |             |            |
| $G_{\text{solv}} = -2554.896516; E_{\text{solv}} = -2555.86617861$ |             |             |            |
| C                                                                  | -2.56727400 | -1.27646700 | 2.77160200 |
| H                                                                  | -2.66157300 | -1.55528600 | 3.82978900 |
| C                                                                  | -2.98867500 | -2.49805400 | 1.90010600 |
| H                                                                  | -2.29536100 | -2.65854800 | 1.07062900 |
| H                                                                  | -2.99433200 | -3.40888100 | 2.50755800 |
| C                                                                  | -4.40079700 | -2.16891100 | 1.36430000 |
| H                                                                  | -4.32069400 | -1.82223800 | 0.32854400 |
| H                                                                  | -5.06709700 | -3.03744700 | 1.37781100 |
| C                                                                  | -4.90210500 | -1.01855800 | 2.24373000 |
| H                                                                  | -5.28309000 | -1.40132400 | 3.20049300 |
| H                                                                  | -5.70167100 | -0.43604900 | 1.77417700 |
| C                                                                  | -3.63052800 | -0.20038000 | 2.47852100 |
| H                                                                  | -3.72161000 | 0.53164900  | 3.28803500 |
| H                                                                  | -3.38790500 | 0.33882400  | 1.55759400 |
| C                                                                  | 0.07329100  | -1.93681700 | 3.66707800 |
| H                                                                  | -0.37841700 | -1.76938900 | 4.65267900 |
| C                                                                  | -0.09166100 | -3.43189000 | 3.30386500 |
| H                                                                  | -0.97969000 | -3.87158800 | 3.76814600 |
| H                                                                  | -0.19077300 | -3.55566600 | 2.21972100 |
| C                                                                  | 1.21463800  | -4.08526200 | 3.76815000 |
| H                                                                  | 1.19892600  | -4.23701000 | 4.85571600 |
| H                                                                  | 1.39144400  | -5.05799900 | 3.29743800 |
| C                                                                  | 2.26667800  | -3.03743100 | 3.39919400 |
| H                                                                  | 2.44520200  | -3.07324200 | 2.31672500 |
| H                                                                  | 3.22899200  | -3.18941400 | 3.89898900 |
| C                                                                  | 1.60969600  | -1.69776300 | 3.77357600 |
| H                                                                  | 1.96173900  | -0.88806300 | 3.12731000 |
| H                                                                  | 1.86665500  | -1.42242000 | 4.80286700 |
| C                                                                  | -0.56527400 | 0.81797200  | 3.45748700 |
| H                                                                  | 0.52890900  | 0.88321700  | 3.53775700 |
| C                                                                  | -1.15777200 | 0.91145200  | 4.89000100 |
| H                                                                  | -2.01770400 | 0.24761600  | 5.02478100 |
| H                                                                  | -0.41079400 | 0.61205700  | 5.63233500 |
| C                                                                  | -1.58076400 | 2.39207200  | 5.07238600 |
| H                                                                  | -2.67320200 | 2.47563200  | 5.02950000 |

|    |             |             |             |
|----|-------------|-------------|-------------|
| H  | -1.26534400 | 2.80059800  | 6.03732800  |
| C  | -0.96591900 | 3.14149500  | 3.88034100  |
| H  | 0.07912600  | 3.40425800  | 4.09333700  |
| H  | -1.49846100 | 4.06763700  | 3.63944500  |
| C  | -1.01726400 | 2.10926600  | 2.75167400  |
| H  | -0.38709200 | 2.36313900  | 1.89471000  |
| H  | -2.04746300 | 2.02410800  | 2.38874000  |
| C  | 0.99896400  | -0.43972500 | -3.27167000 |
| H  | 1.71522400  | -0.88371300 | -3.97719000 |
| C  | 1.18407500  | 1.08271700  | -3.33551500 |
| H  | 2.23721900  | 1.38141100  | -3.34044500 |
| H  | 0.71114500  | 1.55369800  | -2.46741800 |
| C  | 0.45416900  | 1.46873500  | -4.62696300 |
| H  | 0.18609800  | 2.52953900  | -4.65689000 |
| H  | 1.10956600  | 1.26317500  | -5.48355100 |
| C  | -0.78387500 | 0.55288100  | -4.66654300 |
| H  | -1.64618400 | 1.07354200  | -4.24146900 |
| H  | -1.04178400 | 0.27107300  | -5.69275800 |
| C  | -0.43815200 | -0.67976100 | -3.79193900 |
| H  | -0.49516200 | -1.61744700 | -4.35601300 |
| H  | -1.13752900 | -0.75348600 | -2.95332200 |
| C  | 1.19185500  | -3.01815200 | -2.12607000 |
| H  | 0.13852100  | -3.09625400 | -2.42466300 |
| C  | 1.44035600  | -4.07706900 | -1.00739300 |
| H  | 1.91906500  | -3.65741300 | -0.12072900 |
| H  | 0.48074200  | -4.48380000 | -0.67276800 |
| C  | 2.31336600  | -5.17530100 | -1.64999300 |
| H  | 3.37006900  | -5.00777100 | -1.40412200 |
| H  | 2.05376700  | -6.17794300 | -1.29568700 |
| C  | 2.11310400  | -4.99995600 | -3.15843200 |
| H  | 1.15634100  | -5.44149400 | -3.46688900 |
| H  | 2.90327800  | -5.46568900 | -3.75663100 |
| C  | 2.05560600  | -3.47869400 | -3.31993500 |
| H  | 1.63850500  | -3.16678800 | -4.28253600 |
| H  | 3.07253200  | -3.06994200 | -3.25135200 |
| C  | 3.14707000  | -0.89564000 | -1.44021800 |
| H  | 3.59652000  | -1.04795200 | -2.42918600 |
| C  | 3.45530900  | 0.56340400  | -0.97555300 |
| H  | 3.95401100  | 1.11160000  | -1.78199200 |
| H  | 2.54935400  | 1.12069600  | -0.71775300 |
| C  | 4.39098000  | 0.42937500  | 0.24059300  |
| H  | 5.10824300  | 1.25366500  | 0.31109500  |
| H  | 3.79861100  | 0.42405400  | 1.16468900  |
| C  | 5.05302600  | -0.93893300 | 0.05963700  |
| H  | 5.50705000  | -1.32491000 | 0.97848200  |
| H  | 5.83797200  | -0.88409600 | -0.70664200 |
| C  | 3.88800400  | -1.80118200 | -0.43332600 |
| H  | 3.24417400  | -2.03053800 | 0.42281900  |
| H  | 4.20013400  | -2.75099200 | -0.87972300 |
| P  | -0.79910700 | -0.76565300 | 2.51719600  |
| P  | 1.32611000  | -1.23021700 | -1.62814100 |
| Ru | 0.07224100  | -0.77687000 | 0.33780900  |
| H  | 1.35706100  | -0.11392100 | 0.97268000  |
| H  | -0.49385100 | 0.99103800  | -0.08270400 |
| H  | -0.05538700 | -2.33215900 | 0.44642100  |
| H  | 1.24546900  | -1.58341100 | 0.95986100  |
| C  | -1.11430200 | 4.94299800  | -2.37333000 |
| C  | -0.25413800 | 4.70201800  | -1.07801700 |

|                                                                    |             |             |             |
|--------------------------------------------------------------------|-------------|-------------|-------------|
| C                                                                  | -0.37865200 | 5.65573000  | -3.49769500 |
| H                                                                  | -1.04481400 | 5.77409700  | -4.35732200 |
| H                                                                  | -0.05719200 | 6.65253700  | -3.17737900 |
| H                                                                  | 0.49884000  | 5.09423700  | -3.82491100 |
| C                                                                  | 1.23315800  | 4.50143100  | -1.37105900 |
| H                                                                  | 1.71188200  | 5.43938400  | -1.66817500 |
| H                                                                  | 1.72587500  | 4.13492700  | -0.46579100 |
| H                                                                  | 1.39289800  | 3.76473200  | -2.16382400 |
| C                                                                  | -2.44605400 | 5.63831100  | -2.08816600 |
| H                                                                  | -2.30265800 | 6.68930300  | -1.81937700 |
| H                                                                  | -3.06679100 | 5.59490500  | -2.98762600 |
| H                                                                  | -2.99209000 | 5.14322000  | -1.27894700 |
| C                                                                  | -0.43588600 | 5.74398500  | 0.01489200  |
| H                                                                  | 0.19014200  | 5.48699600  | 0.87482200  |
| H                                                                  | -0.13319500 | 6.73423700  | -0.34155900 |
| H                                                                  | -1.47200700 | 5.79531900  | 0.35577400  |
| O                                                                  | -1.42216200 | 3.59752500  | -2.79921400 |
| O                                                                  | -0.76721300 | 3.43844200  | -0.60261300 |
| B                                                                  | -1.31947500 | 2.79488600  | -1.68964900 |
| O                                                                  | -1.70979600 | 1.49889200  | -1.68348000 |
| C                                                                  | -1.60572800 | 0.75476400  | -0.46052400 |
| H                                                                  | -2.22632800 | 1.27853100  | 0.28515300  |
| O                                                                  | -1.84975200 | -0.52834000 | -0.60353700 |
| <b>11Ru</b>                                                        |             |             |             |
| $G_{\text{solv}} = -2554.905918; E_{\text{solv}} = -2555.87736495$ |             |             |             |
| C                                                                  | -2.54151300 | -1.33388600 | 2.60086300  |
| H                                                                  | -2.76386300 | -1.09896600 | 3.64925500  |
| C                                                                  | -2.28281600 | -2.86949700 | 2.47404700  |
| H                                                                  | -1.29001200 | -3.10380100 | 2.08390800  |
| H                                                                  | -2.35965000 | -3.33557700 | 3.46319100  |
| C                                                                  | -3.37679100 | -3.40644600 | 1.53506900  |
| H                                                                  | -3.01801700 | -3.37264500 | 0.49834300  |
| H                                                                  | -3.65335200 | -4.44170100 | 1.76179700  |
| C                                                                  | -4.52895200 | -2.41519100 | 1.69751500  |
| H                                                                  | -5.05546100 | -2.59725300 | 2.64484900  |
| H                                                                  | -5.26454700 | -2.47189900 | 0.88835300  |
| C                                                                  | -3.80256200 | -1.06829200 | 1.73772400  |
| H                                                                  | -4.42205000 | -0.26441800 | 2.14743200  |
| H                                                                  | -3.50896600 | -0.78206100 | 0.72042900  |
| C                                                                  | 0.20687200  | -0.65569900 | 3.37825300  |
| H                                                                  | -0.26060600 | -0.45869400 | 4.34983000  |
| C                                                                  | 0.78319300  | -2.08731100 | 3.43276100  |
| H                                                                  | 0.16201900  | -2.76110600 | 4.03064300  |
| H                                                                  | 0.86448300  | -2.51552700 | 2.42730200  |
| C                                                                  | 2.19100400  | -1.89570700 | 4.00538700  |
| H                                                                  | 2.13818100  | -1.70836600 | 5.08637200  |
| H                                                                  | 2.83551300  | -2.76725200 | 3.84837900  |
| C                                                                  | 2.67912100  | -0.64365600 | 3.27379000  |
| H                                                                  | 2.97102300  | -0.91803200 | 2.25185700  |
| H                                                                  | 3.54552100  | -0.17086300 | 3.74835400  |
| C                                                                  | 1.44775700  | 0.28127200  | 3.22521800  |
| H                                                                  | 1.43128900  | 0.85710500  | 2.29430100  |
| H                                                                  | 1.46922400  | 1.00420700  | 4.04936700  |
| C                                                                  | -1.52569400 | 1.43654700  | 2.59004300  |
| H                                                                  | -0.57203100 | 1.96526100  | 2.47807600  |
| C                                                                  | -2.03268400 | 1.62091400  | 4.05202600  |
| H                                                                  | -1.95433700 | 0.71950800  | 4.66677500  |
| H                                                                  | -1.42765900 | 2.38989500  | 4.54860700  |

|    |             |             |             |
|----|-------------|-------------|-------------|
| C  | -3.48314800 | 2.10252900  | 3.93058700  |
| H  | -4.15489300 | 1.24358500  | 3.80842500  |
| H  | -3.81742500 | 2.65951100  | 4.81210700  |
| C  | -3.47273700 | 2.93967700  | 2.65122400  |
| H  | -3.01393800 | 3.91708400  | 2.85743300  |
| H  | -4.47230700 | 3.12473300  | 2.24447400  |
| C  | -2.58648700 | 2.13316300  | 1.69196200  |
| H  | -2.11741100 | 2.77942300  | 0.94684600  |
| H  | -3.18193800 | 1.40471800  | 1.13756000  |
| C  | 0.39904500  | -0.82479600 | -3.75596800 |
| H  | 0.99456900  | -1.42444600 | -4.45817200 |
| C  | 0.72937900  | 0.65010900  | -4.03921300 |
| H  | 1.80051300  | 0.81425800  | -4.19155900 |
| H  | 0.41492400  | 1.29027300  | -3.20789000 |
| C  | -0.09393400 | 0.95151700  | -5.29775700 |
| H  | -0.24234900 | 2.02450700  | -5.45924700 |
| H  | 0.43454400  | 0.55992500  | -6.17641100 |
| C  | -1.41836300 | 0.19003400  | -5.09552300 |
| H  | -2.17704900 | 0.85104300  | -4.66194800 |
| H  | -1.82285900 | -0.17308900 | -6.04566800 |
| C  | -1.09990800 | -0.96998200 | -4.11513300 |
| H  | -1.29993200 | -1.94963900 | -4.56247600 |
| H  | -1.71600700 | -0.89328000 | -3.21161100 |
| C  | 0.51566000  | -3.27549200 | -2.34546200 |
| H  | -0.55255000 | -3.31768400 | -2.59545600 |
| C  | 0.74457300  | -4.21210100 | -1.11930300 |
| H  | 1.30697000  | -3.73132000 | -0.31682400 |
| H  | -0.22115700 | -4.49256000 | -0.68717200 |
| C  | 1.49565800  | -5.44646300 | -1.66231300 |
| H  | 2.57170800  | -5.34514100 | -1.47055100 |
| H  | 1.16971600  | -6.37775600 | -1.18856800 |
| C  | 1.24825100  | -5.42338500 | -3.17374800 |
| H  | 0.25004600  | -5.82101500 | -3.39936600 |
| H  | 1.97714300  | -6.01261700 | -3.74006400 |
| C  | 1.29494000  | -3.92948400 | -3.50606000 |
| H  | 0.86154600  | -3.69848400 | -4.48426000 |
| H  | 2.34005400  | -3.59254500 | -3.51835500 |
| C  | 2.62575700  | -1.21360000 | -1.98568900 |
| H  | 3.02859600  | -1.50112200 | -2.96495900 |
| C  | 3.01615000  | 0.27198300  | -1.69980800 |
| H  | 3.48206900  | 0.71237600  | -2.58772900 |
| H  | 2.14994100  | 0.88856000  | -1.44705600 |
| C  | 4.01304100  | 0.23187900  | -0.52624200 |
| H  | 4.78380000  | 1.00682000  | -0.60308300 |
| H  | 3.47390800  | 0.39497300  | 0.41480700  |
| C  | 4.58629900  | -1.18760500 | -0.55635500 |
| H  | 5.05384800  | -1.48446500 | 0.38875400  |
| H  | 5.34397800  | -1.27488500 | -1.34676900 |
| C  | 3.35911500  | -2.03533500 | -0.90302600 |
| H  | 2.73810800  | -2.12792200 | -0.00525600 |
| H  | 3.60632300  | -3.04592300 | -1.24514500 |
| P  | -1.08510300 | -0.30675600 | 2.08293300  |
| P  | 0.78262300  | -1.45689600 | -2.05375600 |
| Ru | -0.31666300 | -0.69784600 | -0.10642100 |
| H  | 1.11870000  | -0.53211100 | 0.50377300  |
| H  | -2.38789200 | 2.10172100  | -1.12573100 |
| H  | -0.87721300 | -2.14352900 | 0.05532700  |
| H  | 0.53650800  | -1.82082800 | 0.53092200  |

|                                                                       |             |             |             |
|-----------------------------------------------------------------------|-------------|-------------|-------------|
| C                                                                     | 0.47066000  | 4.81630300  | 0.10241000  |
| C                                                                     | 1.75887400  | 3.98640200  | 0.45402200  |
| C                                                                     | 0.72780600  | 6.07826900  | −0.70495600 |
| H                                                                     | −0.21698900 | 6.59635600  | −0.89426100 |
| H                                                                     | 1.38347300  | 6.75977900  | −0.15279700 |
| H                                                                     | 1.18903400  | 5.85222000  | −1.66859100 |
| C                                                                     | 2.83791500  | 4.06465400  | −0.62696600 |
| H                                                                     | 3.31828700  | 5.04755300  | −0.64671900 |
| H                                                                     | 3.60230100  | 3.31135800  | −0.41664100 |
| H                                                                     | 2.42662500  | 3.85901800  | −1.62043400 |
| C                                                                     | −0.38439100 | 5.13580700  | 1.32919800  |
| H                                                                     | 0.08479600  | 5.90334200  | 1.95210500  |
| H                                                                     | −1.35722300 | 5.50922000  | 0.99705800  |
| H                                                                     | −0.55322500 | 4.24673000  | 1.94430800  |
| C                                                                     | 2.35763200  | 4.28134700  | 1.82042500  |
| H                                                                     | 3.23664600  | 3.64936600  | 1.97907300  |
| H                                                                     | 2.67338300  | 5.32772000  | 1.88822700  |
| H                                                                     | 1.64733100  | 4.07642900  | 2.62430400  |
| O                                                                     | −0.28048700 | 3.88459300  | −0.71337500 |
| O                                                                     | 1.25766800  | 2.63464200  | 0.45269600  |
| B                                                                     | 0.15103100  | 2.62633400  | −0.36367900 |
| O                                                                     | −0.40756600 | 1.46724900  | −0.76732900 |
| C                                                                     | −1.75411100 | 1.24863600  | −1.42353200 |
| H                                                                     | −1.52644100 | 1.33228500  | −2.50066100 |
| O                                                                     | −2.17391700 | 0.05961200  | −1.01482000 |
| <b>TS<sub>11,12-Ru</sub></b>                                          |             |             |             |
| $G_{\text{solv}} = -2554.899776$ ; $E_{\text{solv}} = -2555.87005802$ |             |             |             |
| C                                                                     | −2.41575500 | −1.47998200 | 2.81630600  |
| H                                                                     | −2.56330200 | −1.26101500 | 3.88084800  |
| C                                                                     | −2.13704800 | −3.00916700 | 2.65613400  |
| H                                                                     | −1.16190200 | −3.22361500 | 2.21363200  |
| H                                                                     | −2.15518800 | −3.48757400 | 3.64215500  |
| C                                                                     | −3.27247100 | −3.55387200 | 1.77405500  |
| H                                                                     | −2.98233300 | −3.48542900 | 0.71739600  |
| H                                                                     | −3.50635700 | −4.60163000 | 1.99068000  |
| C                                                                     | −4.43733400 | −2.59969700 | 2.03817200  |
| H                                                                     | −4.89079500 | −2.81719800 | 3.01486600  |
| H                                                                     | −5.22605800 | −2.66014700 | 1.28087100  |
| C                                                                     | −3.74573400 | −1.23363800 | 2.05926300  |
| H                                                                     | −4.35142400 | −0.45451700 | 2.53244200  |
| H                                                                     | −3.54177900 | −0.92175600 | 1.02947900  |
| C                                                                     | 0.31098100  | −0.71671900 | 3.48913400  |
| H                                                                     | −0.14999300 | −0.52010100 | 4.46470000  |
| C                                                                     | 0.91375100  | −2.13692100 | 3.54782000  |
| H                                                                     | 0.30509500  | −2.82350300 | 4.14395100  |
| H                                                                     | 1.00789700  | −2.56242800 | 2.54186800  |
| C                                                                     | 2.31541200  | −1.91488100 | 4.12343500  |
| H                                                                     | 2.25440000  | −1.71897300 | 5.20247800  |
| H                                                                     | 2.97644200  | −2.77584200 | 3.97676500  |
| C                                                                     | 2.78145800  | −0.66097200 | 3.38092900  |
| H                                                                     | 3.08448400  | −0.94169700 | 2.36424700  |
| H                                                                     | 3.63615700  | −0.16586400 | 3.85384300  |
| C                                                                     | 1.53247800  | 0.23983100  | 3.31454400  |
| H                                                                     | 1.50451600  | 0.79907300  | 2.37473100  |
| H                                                                     | 1.54110800  | 0.97826500  | 4.12514300  |
| C                                                                     | −1.48328400 | 1.32501900  | 2.69655500  |
| H                                                                     | −0.54017500 | 1.86440100  | 2.55239900  |
| C                                                                     | −1.96067600 | 1.53885400  | 4.16549100  |

|    |             |             |             |
|----|-------------|-------------|-------------|
| H  | -1.94565700 | 0.62891600  | 4.77274000  |
| H  | -1.29398800 | 2.25459500  | 4.66169900  |
| C  | -3.37609500 | 2.12571100  | 4.06343500  |
| H  | -4.11419200 | 1.31629900  | 3.99464900  |
| H  | -3.64112200 | 2.73844900  | 4.93137200  |
| C  | -3.34799700 | 2.90982500  | 2.75064200  |
| H  | -2.80818400 | 3.85554200  | 2.89766800  |
| H  | -4.34532300 | 3.15543300  | 2.37060900  |
| C  | -2.56187300 | 1.99534900  | 1.80348400  |
| H  | -2.10627300 | 2.54467600  | 0.97686900  |
| H  | -3.23095900 | 1.25403800  | 1.35907700  |
| C  | 0.53526700  | -0.88682300 | -3.62523300 |
| H  | 1.22025500  | -1.41666000 | -4.30120600 |
| C  | 0.76082500  | 0.62048800  | -3.84036600 |
| H  | 1.82188900  | 0.87022100  | -3.93440500 |
| H  | 0.36472500  | 1.20070300  | -2.99960100 |
| C  | -0.02194400 | 0.90687500  | -5.12750500 |
| H  | -0.23781100 | 1.97161400  | -5.26458400 |
| H  | 0.56913100  | 0.57897800  | -5.99241600 |
| C  | -1.29665500 | 0.05221300  | -5.00628200 |
| H  | -2.10181100 | 0.63676900  | -4.54588200 |
| H  | -1.66550300 | -0.27336900 | -5.98391200 |
| C  | -0.91832700 | -1.14656800 | -4.09709300 |
| H  | -0.98529000 | -2.09992400 | -4.63180500 |
| H  | -1.60236300 | -1.21814800 | -3.24304900 |
| C  | 0.63397400  | -3.35663800 | -2.24632200 |
| H  | -0.42155900 | -3.41391200 | -2.54348000 |
| C  | 0.82355700  | -4.30840500 | -1.02636800 |
| H  | 1.39456800  | -3.84809000 | -0.21749000 |
| H  | -0.15260200 | -4.56490700 | -0.60303600 |
| C  | 1.55065600  | -5.55812200 | -1.57187200 |
| H  | 2.61920300  | -5.50631300 | -1.32704900 |
| H  | 1.16627700  | -6.48801800 | -1.14124500 |
| C  | 1.37765900  | -5.48761500 | -3.09309400 |
| H  | 0.38463700  | -5.85813900 | -3.37975900 |
| H  | 2.12256800  | -6.07592700 | -3.63896200 |
| C  | 1.46838700  | -3.98661300 | -3.37997600 |
| H  | 1.09673200  | -3.71910100 | -4.37429400 |
| H  | 2.51752800  | -3.66825900 | -3.32079700 |
| C  | 2.70448700  | -1.28886100 | -1.79226400 |
| H  | 3.13856700  | -1.58858900 | -2.75432900 |
| C  | 3.08583200  | 0.19887400  | -1.51248900 |
| H  | 3.55056200  | 0.63771000  | -2.40178000 |
| H  | 2.21430400  | 0.80900100  | -1.26358700 |
| C  | 4.07811900  | 0.16936500  | -0.33351900 |
| H  | 4.86265400  | 0.92836600  | -0.42661700 |
| H  | 3.53630100  | 0.36898500  | 0.59848000  |
| C  | 4.63126300  | -1.25845900 | -0.32300600 |
| H  | 5.07538500  | -1.54132200 | 0.63767600  |
| H  | 5.40394700  | -1.37310500 | -1.09514100 |
| C  | 3.40207300  | -2.09923300 | -0.67842700 |
| H  | 2.75856600  | -2.16743600 | 0.20600100  |
| H  | 3.64588100  | -3.11875800 | -0.99620100 |
| P  | -1.01581100 | -0.41468500 | 2.21853800  |
| P  | 0.86723700  | -1.53900200 | -1.91873100 |
| Ru | -0.28625000 | -0.80983000 | 0.00974600  |
| H  | 1.13888400  | -0.65888600 | 0.61315100  |
| H  | -2.61590600 | 1.82288400  | -1.15959000 |

|                                                                       |             |             |             |
|-----------------------------------------------------------------------|-------------|-------------|-------------|
| H                                                                     | −0.85184400 | −2.26620200 | 0.14426900  |
| H                                                                     | 0.40246900  | −2.04251800 | 0.63094200  |
| C                                                                     | 0.63294500  | 4.62546800  | 0.25253400  |
| C                                                                     | 1.89526200  | 3.79048100  | 0.67232400  |
| C                                                                     | 0.93830300  | 5.87445000  | −0.56183200 |
| H                                                                     | 0.00822700  | 6.40245000  | −0.79441300 |
| H                                                                     | 1.58346500  | 6.55738700  | 0.00163600  |
| H                                                                     | 1.42972100  | 5.62697600  | −1.50540700 |
| C                                                                     | 3.01143700  | 3.83367700  | −0.37432300 |
| H                                                                     | 3.50092600  | 4.81220100  | −0.40763800 |
| H                                                                     | 3.76196800  | 3.08083500  | −0.11834400 |
| H                                                                     | 2.62874700  | 3.60149100  | −1.37332500 |
| C                                                                     | −0.26004800 | 4.98325000  | 1.44375800  |
| H                                                                     | 0.19327900  | 5.75664600  | 2.07199700  |
| H                                                                     | −1.21655100 | 5.36015600  | 1.06973100  |
| H                                                                     | −0.46250000 | 4.10650600  | 2.06632100  |
| C                                                                     | 2.45770600  | 4.12087900  | 2.04772400  |
| H                                                                     | 3.31965800  | 3.47865400  | 2.25452900  |
| H                                                                     | 2.79059600  | 5.16342600  | 2.09556900  |
| H                                                                     | 1.71937000  | 3.95263800  | 2.83501200  |
| O                                                                     | −0.09079800 | 3.69373300  | −0.56639400 |
| O                                                                     | 1.37928000  | 2.45418100  | 0.69406900  |
| B                                                                     | 0.28322000  | 2.40575700  | −0.16943100 |
| O                                                                     | −0.31565700 | 1.29651800  | −0.56169100 |
| C                                                                     | −2.08580500 | 0.89445700  | −1.41872500 |
| H                                                                     | −1.56762600 | 0.90527400  | −2.38169100 |
| O                                                                     | −2.36341500 | −0.17106100 | −0.83995800 |
| <b>12Ru</b>                                                           |             |             |             |
| $G_{\text{solv}} = -2554.912091$ ; $E_{\text{solv}} = -2555.88040484$ |             |             |             |
| C                                                                     | −2.50460700 | −1.37240300 | 2.63807400  |
| H                                                                     | −2.66784600 | −1.13868600 | 3.69693600  |
| C                                                                     | −2.20372600 | −2.90029100 | 2.51071900  |
| H                                                                     | −1.23400300 | −3.10783100 | 2.05370200  |
| H                                                                     | −2.19473900 | −3.35449700 | 3.50791700  |
| C                                                                     | −3.34559900 | −3.48590500 | 1.66289600  |
| H                                                                     | −3.06765700 | −3.45473600 | 0.60120100  |
| H                                                                     | −3.56870500 | −4.52657200 | 1.92029500  |
| C                                                                     | −4.51667800 | −2.53293300 | 1.90494500  |
| H                                                                     | −4.95932200 | −2.71825600 | 2.89293300  |
| H                                                                     | −5.31236500 | −2.62562100 | 1.15812100  |
| C                                                                     | −3.83454000 | −1.16237800 | 1.87485800  |
| H                                                                     | −4.44398800 | −0.36692000 | 2.31519200  |
| H                                                                     | −3.63334700 | −0.89753500 | 0.83109400  |
| C                                                                     | 0.16752900  | −0.54520100 | 3.37439600  |
| H                                                                     | −0.34287200 | −0.34807200 | 4.32554500  |
| C                                                                     | 0.79390900  | −1.95522600 | 3.46402600  |
| H                                                                     | 0.18841000  | −2.64308700 | 4.06209500  |
| H                                                                     | 0.90710700  | −2.39207200 | 2.46514500  |
| C                                                                     | 2.18574000  | −1.70628700 | 4.05278300  |
| H                                                                     | 2.11149100  | −1.50564600 | 5.13025600  |
| H                                                                     | 2.86175400  | −2.55743800 | 3.91698600  |
| C                                                                     | 2.63746300  | −0.44769800 | 3.30984100  |
| H                                                                     | 2.94702900  | −0.72162700 | 2.29285900  |
| H                                                                     | 3.48236700  | 0.06073700  | 3.78641300  |
| C                                                                     | 1.37576000  | 0.43281100  | 3.24035200  |
| H                                                                     | 1.35898900  | 1.01182200  | 2.31364500  |
| H                                                                     | 1.35939600  | 1.15163200  | 4.06868300  |
| C                                                                     | −1.63264500 | 1.44707500  | 2.44739600  |

|    |             |             |             |
|----|-------------|-------------|-------------|
| H  | -0.69660200 | 2.00264000  | 2.31994500  |
| C  | -2.17522500 | 1.71495300  | 3.88406900  |
| H  | -2.26156300 | 0.81220500  | 4.49644400  |
| H  | -1.48801600 | 2.38482900  | 4.41401600  |
| C  | -3.54200200 | 2.39572000  | 3.69509500  |
| H  | -4.33458900 | 1.63776500  | 3.64696200  |
| H  | -3.79070000 | 3.07645500  | 4.51567200  |
| C  | -3.42326600 | 3.09441800  | 2.33894300  |
| H  | -2.82387000 | 4.00885400  | 2.44182000  |
| H  | -4.39138600 | 3.37985200  | 1.91341000  |
| C  | -2.67368200 | 2.06882800  | 1.48188300  |
| H  | -2.18890100 | 2.50741000  | 0.60625500  |
| H  | -3.38294900 | 1.31706400  | 1.12060900  |
| C  | 0.37712700  | -0.72179700 | -3.73778400 |
| H  | 1.09046200  | -1.14568400 | -4.45785700 |
| C  | 0.44711300  | 0.81408000  | -3.84190700 |
| H  | 1.47217600  | 1.17672300  | -3.96472800 |
| H  | 0.04075200  | 1.27336500  | -2.93378000 |
| C  | -0.44127200 | 1.12369300  | -5.04980300 |
| H  | -0.72858700 | 2.17881700  | -5.10965100 |
| H  | 0.08710800  | 0.86922700  | -5.97853000 |
| C  | -1.64119800 | 0.18813600  | -4.85497000 |
| H  | -2.36569700 | 0.66602400  | -4.18179000 |
| H  | -2.17291200 | -0.02570100 | -5.78749600 |
| C  | -1.06311700 | -1.08776000 | -4.19772000 |
| H  | -1.03409400 | -1.92338600 | -4.90501600 |
| H  | -1.68912900 | -1.40897900 | -3.35851100 |
| C  | 0.59892000  | -3.23590300 | -2.43037000 |
| H  | -0.45771000 | -3.30982800 | -2.71831000 |
| C  | 0.81540900  | -4.20336900 | -1.22832700 |
| H  | 1.40035500  | -3.75107000 | -0.42454300 |
| H  | -0.15134300 | -4.46796000 | -0.78874800 |
| C  | 1.53467300  | -5.44292400 | -1.80807300 |
| H  | 2.60571000  | -5.39854900 | -1.57310400 |
| H  | 1.15301200  | -6.38125900 | -1.39349300 |
| C  | 1.34646100  | -5.34163100 | -3.32676900 |
| H  | 0.35197600  | -5.70988100 | -3.61159900 |
| H  | 2.08815300  | -5.91627400 | -3.89133600 |
| C  | 1.42949700  | -3.83440000 | -3.58263000 |
| H  | 1.05139100  | -3.54275700 | -4.56800800 |
| H  | 2.47778800  | -3.51483100 | -3.52138900 |
| C  | 2.64442200  | -1.15534300 | -2.01642400 |
| H  | 3.04576100  | -1.44888600 | -2.99448200 |
| C  | 3.03141800  | 0.33037900  | -1.74116100 |
| H  | 3.45295400  | 0.77872000  | -2.64748400 |
| H  | 2.16741200  | 0.93036300  | -1.44839200 |
| C  | 4.07363000  | 0.29369100  | -0.60516200 |
| H  | 4.85532900  | 1.05067400  | -0.73004200 |
| H  | 3.57092500  | 0.49222600  | 0.34897700  |
| C  | 4.62277700  | -1.13552100 | -0.62052800 |
| H  | 5.10369000  | -1.42260200 | 0.32095800  |
| H  | 5.36405600  | -1.25071800 | -1.42301400 |
| C  | 3.37810400  | -1.97075100 | -0.93020600 |
| H  | 2.76443100  | -2.03592600 | -0.02417700 |
| H  | 3.60597000  | -2.99108600 | -1.25733200 |
| P  | -1.11001100 | -0.29352500 | 2.04432100  |
| P  | 0.80892200  | -1.42213700 | -2.07433900 |
| Ru | -0.32749100 | -0.70794800 | -0.13716200 |

|                                                                       |             |             |             |
|-----------------------------------------------------------------------|-------------|-------------|-------------|
| H                                                                     | 1.09071100  | −0.58643100 | 0.49779700  |
| H                                                                     | −3.78433500 | 0.74864100  | −2.02354000 |
| H                                                                     | −0.94971100 | −2.15520400 | −0.03999800 |
| H                                                                     | 0.29458500  | −1.97974800 | 0.48764200  |
| C                                                                     | 0.73491100  | 4.67327400  | 0.08299500  |
| C                                                                     | 1.95401300  | 3.85222600  | 0.63733600  |
| C                                                                     | 1.11387900  | 5.89130400  | −0.74873600 |
| H                                                                     | 0.20857200  | 6.40932400  | −1.08106000 |
| H                                                                     | 1.71107000  | 6.59669000  | −0.16026200 |
| H                                                                     | 1.68280100  | 5.60694400  | −1.63690700 |
| C                                                                     | 3.15784200  | 3.86505100  | −0.30848600 |
| H                                                                     | 3.63978100  | 4.84751600  | −0.34397900 |
| H                                                                     | 3.89042600  | 3.13555100  | 0.04719100  |
| H                                                                     | 2.86670100  | 3.58199600  | −1.32499600 |
| C                                                                     | −0.24824000 | 5.08234400  | 1.18475000  |
| H                                                                     | 0.15596600  | 5.87538200  | 1.82227500  |
| H                                                                     | −1.16803300 | 5.44886800  | 0.71891800  |
| H                                                                     | −0.50871100 | 4.22838600  | 1.81762300  |
| C                                                                     | 2.39907700  | 4.23457900  | 2.04347600  |
| H                                                                     | 3.24005600  | 3.60271200  | 2.34651200  |
| H                                                                     | 2.72768300  | 5.27916200  | 2.08160200  |
| H                                                                     | 1.59648300  | 4.09402700  | 2.77132000  |
| O                                                                     | 0.07479000  | 3.71774800  | −0.75080400 |
| O                                                                     | 1.43777300  | 2.52022000  | 0.66147800  |
| B                                                                     | 0.39082800  | 2.42810900  | −0.27221700 |
| O                                                                     | −0.22521300 | 1.34098100  | −0.65490500 |
| C                                                                     | −2.75873100 | 0.67840300  | −1.62838500 |
| H                                                                     | −2.08835200 | 1.54834900  | −1.65388000 |
| O                                                                     | −2.37907400 | −0.37630000 | −1.14945300 |
| <b>13Ru</b>                                                           |             |             |             |
| $G_{\text{solv}} = -2440.451472$ ; $E_{\text{solv}} = -2441.38796780$ |             |             |             |
| C                                                                     | −2.10613400 | −1.79104400 | 3.01944500  |
| H                                                                     | −2.36537400 | −1.46878000 | 4.03468400  |
| C                                                                     | −1.43317300 | −3.19824600 | 3.10061500  |
| H                                                                     | −0.42869400 | −3.21384100 | 2.66929700  |
| H                                                                     | −1.33574700 | −3.49752900 | 4.14997800  |
| C                                                                     | −2.37311600 | −4.15912800 | 2.35053900  |
| H                                                                     | −2.07063700 | −4.22516500 | 1.29750200  |
| H                                                                     | −2.35433700 | −5.17261400 | 2.76401700  |
| C                                                                     | −3.74620400 | −3.49063600 | 2.44022700  |
| H                                                                     | −4.17437700 | −3.63729900 | 3.44074100  |
| H                                                                     | −4.46447000 | −3.87652200 | 1.70935300  |
| C                                                                     | −3.41202100 | −2.01230500 | 2.22114300  |
| H                                                                     | −4.21155000 | −1.33635500 | 2.54049600  |
| H                                                                     | −3.23877600 | −1.84123900 | 1.15052900  |
| C                                                                     | 0.22326500  | −0.19519400 | 3.65638100  |
| H                                                                     | −0.36662900 | −0.01117900 | 4.56492400  |
| C                                                                     | 1.20608500  | −1.34301000 | 3.95567900  |
| H                                                                     | 0.75738800  | −2.13303100 | 4.56566000  |
| H                                                                     | 1.55688400  | −1.79742100 | 3.02038500  |
| C                                                                     | 2.37317800  | −0.63670100 | 4.65191800  |
| H                                                                     | 2.09241200  | −0.38603100 | 5.68356200  |
| H                                                                     | 3.27878900  | −1.25101800 | 4.69460100  |
| C                                                                     | 2.55254000  | 0.64100400  | 3.82387600  |
| H                                                                     | 3.16026000  | 0.42358200  | 2.93769500  |
| H                                                                     | 3.06045300  | 1.43788800  | 4.37697900  |
| C                                                                     | 1.12602900  | 1.04135700  | 3.38114900  |
| H                                                                     | 1.13443200  | 1.31765900  | 2.32391800  |

|   |             |             |             |
|---|-------------|-------------|-------------|
| H | 0.75644600  | 1.90878400  | 3.94022200  |
| C | -1.94277200 | 1.09513800  | 2.34269700  |
| H | -1.16558800 | 1.84103900  | 2.13229700  |
| C | -2.63824800 | 1.48935900  | 3.67042800  |
| H | -2.92738300 | 0.61373000  | 4.26138600  |
| H | -1.96102900 | 2.07976400  | 4.29692100  |
| C | -3.89489500 | 2.29974300  | 3.25636900  |
| H | -4.79845200 | 1.70920800  | 3.44939900  |
| H | -3.99518800 | 3.23178200  | 3.82167200  |
| C | -3.75079800 | 2.53879100  | 1.74456300  |
| H | -3.13370300 | 3.42661500  | 1.55475500  |
| H | -4.71353900 | 2.69248700  | 1.24583900  |
| C | -3.00732500 | 1.29553800  | 1.24942300  |
| H | -2.54647800 | 1.42211100  | 0.26665800  |
| H | -3.70001100 | 0.44775400  | 1.20073400  |
| C | 0.66043600  | -0.42914200 | -3.31873000 |
| H | 1.00735000  | -0.96512400 | -4.21029500 |
| C | 1.40551700  | 0.92364200  | -3.26430700 |
| H | 2.41543500  | 0.85161700  | -3.68186000 |
| H | 1.49938200  | 1.27313700  | -2.23459300 |
| C | 0.49538400  | 1.87566200  | -4.04749200 |
| H | 0.71103600  | 2.93084400  | -3.84447200 |
| H | 0.61687500  | 1.71121800  | -5.12689100 |
| C | -0.90967400 | 1.46245300  | -3.59900100 |
| H | -1.10982000 | 1.88506700  | -2.60906500 |
| H | -1.69525400 | 1.80525200  | -4.28082200 |
| C | -0.84662600 | -0.07431800 | -3.49748900 |
| H | -1.23519900 | -0.54715900 | -4.40673800 |
| H | -1.46053600 | -0.43347300 | -2.66236300 |
| C | 0.33486900  | -3.16075500 | -2.61628000 |
| H | -0.68446300 | -2.91039700 | -2.94092700 |
| C | 0.23173900  | -4.36995900 | -1.63812300 |
| H | 0.80834000  | -4.22194200 | -0.72242300 |
| H | -0.80925000 | -4.50260800 | -1.32627400 |
| C | 0.74130100  | -5.59773900 | -2.42430700 |
| H | 1.78176100  | -5.81212400 | -2.14964600 |
| H | 0.16013900  | -6.50110500 | -2.21456300 |
| C | 0.68376000  | -5.17690000 | -3.89665200 |
| H | -0.34238100 | -5.26606300 | -4.27694800 |
| H | 1.33092000  | -5.77940000 | -4.54241000 |
| C | 1.09076300  | -3.70148200 | -3.84893800 |
| H | 0.84072900  | -3.16087200 | -4.76708700 |
| H | 2.17664400  | -3.63034400 | -3.70755600 |
| C | 2.77605400  | -1.71095800 | -1.77776500 |
| H | 3.15465900  | -1.81254100 | -2.80275100 |
| C | 3.45468200  | -0.47526500 | -1.10686200 |
| H | 4.01267800  | 0.09373200  | -1.85814200 |
| H | 2.73361200  | 0.21220300  | -0.65714200 |
| C | 4.40218000  | -1.04700100 | -0.03208000 |
| H | 5.32468200  | -0.46565200 | 0.06711500  |
| H | 3.89883000  | -1.03422900 | 0.94303300  |
| C | 4.64203400  | -2.49871000 | -0.45498300 |
| H | 5.01301200  | -3.13110100 | 0.35860900  |
| H | 5.37178900  | -2.54306000 | -1.27471900 |
| C | 3.26025100  | -2.92522000 | -0.95642600 |
| H | 2.60626700  | -3.08130800 | -0.08943300 |
| H | 3.26949200  | -3.85121000 | -1.54115700 |
| P | -0.99538400 | -0.49712400 | 2.29044300  |

|                                                                       |             |             |             |
|-----------------------------------------------------------------------|-------------|-------------|-------------|
| P                                                                     | 0.93197500  | −1.56146200 | −1.87535000 |
| Ru                                                                    | −0.10020800 | −0.98552000 | 0.16616800  |
| H                                                                     | 1.25199000  | −1.26466300 | 0.85709500  |
| H                                                                     | −0.91193700 | −2.34503400 | 0.15555800  |
| H                                                                     | 0.17378800  | −2.46843900 | 0.63570000  |
| C                                                                     | 0.65592600  | 4.42717300  | 0.16845900  |
| C                                                                     | 2.08029500  | 3.76644200  | 0.13856000  |
| C                                                                     | 0.52446100  | 5.69466900  | −0.66395900 |
| H                                                                     | −0.49252400 | 6.09015100  | −0.57824200 |
| H                                                                     | 1.21940400  | 6.46553800  | −0.31275600 |
| H                                                                     | 0.72156200  | 5.50048300  | −1.72071000 |
| C                                                                     | 2.78629800  | 3.93736600  | −1.20940500 |
| H                                                                     | 3.13228500  | 4.96492000  | −1.36169200 |
| H                                                                     | 3.65494600  | 3.27237400  | −1.23978400 |
| H                                                                     | 2.12758500  | 3.66610800  | −2.03997600 |
| C                                                                     | 0.15692900  | 4.68423500  | 1.59441700  |
| H                                                                     | 0.68855800  | 5.51400800  | 2.07138000  |
| H                                                                     | −0.90778300 | 4.93367500  | 1.55578700  |
| H                                                                     | 0.27352200  | 3.79367700  | 2.22075900  |
| C                                                                     | 3.00666100  | 4.19437200  | 1.26922200  |
| H                                                                     | 3.97216300  | 3.68908000  | 1.16563200  |
| H                                                                     | 3.18434700  | 5.27522900  | 1.24402700  |
| H                                                                     | 2.59420100  | 3.92813900  | 2.24522500  |
| O                                                                     | −0.17064000 | 3.40264300  | −0.39515400 |
| O                                                                     | 1.77187500  | 2.37835400  | 0.29102400  |
| B                                                                     | 0.45306300  | 2.16974900  | −0.14577000 |
| O                                                                     | −0.10927900 | 0.99823900  | −0.29927900 |
| <b>14Ru</b>                                                           |             |             |             |
| $G_{\text{solv}} = -2852.074642$ ; $E_{\text{solv}} = -2853.19707293$ |             |             |             |
| C                                                                     | −1.09924200 | −1.45606200 | 3.46507800  |
| H                                                                     | −1.15368900 | −1.12463100 | 4.50877300  |
| C                                                                     | −0.40984400 | −2.85761700 | 3.42662500  |
| H                                                                     | 0.53458100  | −2.86039500 | 2.87908800  |
| H                                                                     | −0.18668100 | −3.18097400 | 4.44992100  |
| C                                                                     | −1.42967000 | −3.80798100 | 2.78115200  |
| H                                                                     | −1.31385300 | −3.78755100 | 1.68917700  |
| H                                                                     | −1.30630900 | −4.84502800 | 3.11078000  |
| C                                                                     | −2.78136000 | −3.20081600 | 3.15672100  |
| H                                                                     | −3.00884400 | −3.40929700 | 4.21093100  |
| H                                                                     | −3.61212400 | −3.58106000 | 2.55268400  |
| C                                                                     | −2.53856500 | −1.70345700 | 2.94581100  |
| H                                                                     | −3.27402800 | −1.07191300 | 3.45310000  |
| H                                                                     | −2.60785300 | −1.48564700 | 1.87512800  |
| C                                                                     | 1.31125600  | 0.14819100  | 3.62202600  |
| H                                                                     | 0.91160500  | 0.36089800  | 4.62079000  |
| C                                                                     | 2.31012900  | −1.02257100 | 3.76033000  |
| H                                                                     | 2.02673400  | −1.71948200 | 4.55534500  |
| H                                                                     | 2.36941300  | −1.59179000 | 2.82641500  |
| C                                                                     | 3.66007500  | −0.34103400 | 4.00422500  |
| H                                                                     | 3.72522000  | 0.01146500  | 5.04252800  |
| H                                                                     | 4.50983600  | −1.00874700 | 3.82409700  |
| C                                                                     | 3.60968100  | 0.84890600  | 3.04424400  |
| H                                                                     | 3.79591300  | 0.49692900  | 2.02132000  |
| H                                                                     | 4.35380500  | 1.62053200  | 3.26897600  |
| C                                                                     | 2.16459000  | 1.36779700  | 3.15262400  |
| H                                                                     | 1.82445700  | 1.78297200  | 2.20031100  |
| H                                                                     | 2.09735300  | 2.16921700  | 3.89859200  |
| C                                                                     | −1.09428500 | 1.43811800  | 2.86714000  |

|    |             |             |             |
|----|-------------|-------------|-------------|
| H  | -0.39383600 | 2.19890000  | 2.50392600  |
| C  | -1.43728100 | 1.74438900  | 4.35785600  |
| H  | -1.12928700 | 0.95820900  | 5.05370200  |
| H  | -0.91492700 | 2.65627500  | 4.67092500  |
| C  | -2.95868500 | 1.96399600  | 4.40100300  |
| H  | -3.47054300 | 1.00817200  | 4.57229900  |
| H  | -3.26274100 | 2.64594200  | 5.20202400  |
| C  | -3.29581000 | 2.47829500  | 2.99971000  |
| H  | -3.01072100 | 3.53602800  | 2.91407800  |
| H  | -4.36212900 | 2.40464800  | 2.75797000  |
| C  | -2.42194500 | 1.60923200  | 2.08953400  |
| H  | -2.25430100 | 2.04014200  | 1.10131600  |
| H  | -2.91783900 | 0.65388100  | 1.91514100  |
| C  | 1.87323200  | -0.11138800 | -3.00418300 |
| H  | 2.43594300  | -0.65069800 | -3.77981800 |
| C  | 2.73903200  | 1.07635900  | -2.55270000 |
| H  | 3.78783700  | 0.80478600  | -2.39940800 |
| H  | 2.35539400  | 1.49285400  | -1.61237600 |
| C  | 2.54252000  | 2.07204400  | -3.69939600 |
| H  | 2.90092600  | 3.08009200  | -3.46512800 |
| H  | 3.09966100  | 1.72583900  | -4.58080900 |
| C  | 1.03195500  | 2.00742400  | -3.96522600 |
| H  | 0.50428000  | 2.68232500  | -3.28064300 |
| H  | 0.77234100  | 2.30940000  | -4.98568100 |
| C  | 0.62574500  | 0.54363800  | -3.65629600 |
| H  | 0.33813600  | -0.00198100 | -4.56227800 |
| H  | -0.22595200 | 0.51971800  | -2.97405600 |
| C  | 0.50968600  | -2.58988100 | -2.73360300 |
| H  | -0.31322400 | -1.98130900 | -3.12173500 |
| C  | -0.13277400 | -3.76983600 | -1.94621600 |
| H  | 0.31491400  | -3.91734700 | -0.96037000 |
| H  | -1.19308300 | -3.55579200 | -1.77516900 |
| C  | 0.04907700  | -5.01786700 | -2.83773900 |
| H  | 0.90993200  | -5.60399800 | -2.49120500 |
| H  | -0.82178100 | -5.68084300 | -2.81760900 |
| C  | 0.34717900  | -4.46262900 | -4.23541300 |
| H  | -0.58457200 | -4.14360500 | -4.72188800 |
| H  | 0.83463700  | -5.19012600 | -4.89302700 |
| C  | 1.21930900  | -3.23884700 | -3.93837700 |
| H  | 1.30550400  | -2.55457700 | -4.78911400 |
| H  | 2.23119500  | -3.57502900 | -3.67864400 |
| C  | 3.11464300  | -2.17337100 | -1.44362300 |
| H  | 3.53518100  | -2.34140100 | -2.44234300 |
| C  | 4.12674800  | -1.30783700 | -0.63059800 |
| H  | 4.96263200  | -1.01824200 | -1.27692200 |
| H  | 3.68044800  | -0.38610100 | -0.24837700 |
| C  | 4.62216600  | -2.20726000 | 0.51585800  |
| H  | 5.65667100  | -1.99239700 | 0.80309300  |
| H  | 3.99595200  | -2.05261700 | 1.40353700  |
| C  | 4.41721400  | -3.63216300 | -0.00472600 |
| H  | 4.42904500  | -4.38821500 | 0.78769700  |
| H  | 5.20492000  | -3.88936800 | -0.72548500 |
| C  | 3.06214900  | -3.53384500 | -0.71207400 |
| H  | 2.27062000  | -3.53743900 | 0.04607100  |
| H  | 2.86408200  | -4.36458900 | -1.39775000 |
| P  | -0.16806200 | -0.14218400 | 2.52769000  |
| P  | 1.46028300  | -1.36712700 | -1.70887500 |
| Ru | 0.42261200  | -0.69106600 | 0.29709200  |

|                                                                      |             |             |             |
|----------------------------------------------------------------------|-------------|-------------|-------------|
| H                                                                    | 1.76424400  | 0.03290300  | 0.62634900  |
| H                                                                    | 0.47675900  | −2.20833300 | 0.75729000  |
| H                                                                    | 1.50900400  | −1.58403800 | 0.97102200  |
| C                                                                    | −0.37736600 | 4.59606300  | −0.37830800 |
| C                                                                    | 1.05367600  | 4.23164200  | 0.16117300  |
| C                                                                    | −0.40863400 | 5.72661400  | −1.39842000 |
| H                                                                    | −1.44249700 | 5.91996100  | −1.70193300 |
| H                                                                    | −0.00268600 | 6.65036000  | −0.97142200 |
| H                                                                    | 0.16290900  | 5.47454400  | −2.29456000 |
| C                                                                    | 2.14980000  | 4.45897200  | −0.88026500 |
| H                                                                    | 2.35046100  | 5.52403200  | −1.03633200 |
| H                                                                    | 3.07212200  | 3.97908600  | −0.53912000 |
| H                                                                    | 1.87037200  | 4.01553700  | −1.83860200 |
| C                                                                    | −1.36942100 | 4.88930500  | 0.75039600  |
| H                                                                    | −1.18074300 | 5.86134800  | 1.21785400  |
| H                                                                    | −2.38441600 | 4.89193100  | 0.34142500  |
| H                                                                    | −1.32103000 | 4.11983500  | 1.52475000  |
| C                                                                    | 1.43782000  | 4.90804300  | 1.47176300  |
| H                                                                    | 2.44833500  | 4.60232300  | 1.76098600  |
| H                                                                    | 1.43051500  | 5.99880100  | 1.36769600  |
| H                                                                    | 0.75965600  | 4.63056000  | 2.28228800  |
| O                                                                    | −0.78664200 | 3.38114100  | −1.01252700 |
| O                                                                    | 0.94853000  | 2.82354400  | 0.38206100  |
| B                                                                    | −0.09548800 | 2.31227300  | −0.40834400 |
| O                                                                    | −0.40922700 | 1.04916000  | −0.56193600 |
| C                                                                    | −3.37663600 | −0.45193600 | −2.67133600 |
| C                                                                    | −4.01310900 | 0.22181700  | −1.39551600 |
| H                                                                    | −1.30029200 | −1.44806500 | −0.15998400 |
| C                                                                    | −3.20681200 | 0.47906200  | −3.86307200 |
| H                                                                    | −2.73516700 | −0.06422600 | −4.68749100 |
| H                                                                    | −4.17955400 | 0.84342900  | −4.20996500 |
| H                                                                    | −2.57657100 | 1.33566100  | −3.61628300 |
| C                                                                    | −3.78480800 | 1.72904300  | −1.32591200 |
| H                                                                    | −4.34023900 | 2.24845400  | −2.11326900 |
| H                                                                    | −4.14321300 | 2.09684000  | −0.35993400 |
| H                                                                    | −2.72565000 | 1.98368400  | −1.40795300 |
| C                                                                    | −4.07684200 | −1.74170300 | −3.09871200 |
| H                                                                    | −5.07006400 | −1.54429700 | −3.51333200 |
| H                                                                    | −3.47415200 | −2.23253200 | −3.86901200 |
| H                                                                    | −4.18021100 | −2.43640100 | −2.25952400 |
| C                                                                    | −5.48436500 | −0.09792300 | −1.17511100 |
| H                                                                    | −5.82945800 | 0.39283100  | −0.26023500 |
| H                                                                    | −6.08811600 | 0.27744700  | −2.00806100 |
| H                                                                    | −5.66007800 | −1.17073800 | −1.07046400 |
| O                                                                    | −2.06337000 | −0.84169800 | −2.20843800 |
| O                                                                    | −3.25207100 | −0.37812600 | −0.31498700 |
| B                                                                    | −2.07844200 | −0.81566000 | −0.84749300 |
| TS <sub>14,15-Ru</sub>                                               |             |             |             |
| G <sub>solv</sub> = −2852.072033; E <sub>solv</sub> = −2853.19694451 |             |             |             |
| C                                                                    | −1.64786500 | −1.39646800 | 3.24117800  |
| H                                                                    | −1.70437300 | −1.07350300 | 4.28732000  |
| C                                                                    | −0.94978800 | −2.79310400 | 3.19143300  |
| H                                                                    | −0.00289000 | −2.78417800 | 2.64823100  |
| H                                                                    | −0.73012700 | −3.12579400 | 4.21253600  |
| C                                                                    | −1.96061300 | −3.74231700 | 2.53061600  |
| H                                                                    | −1.84064600 | −3.70750500 | 1.43955000  |
| H                                                                    | −1.83132500 | −4.78242400 | 2.84816500  |
| C                                                                    | −3.31791600 | −3.14928400 | 2.90846100  |

|   |             |             |             |
|---|-------------|-------------|-------------|
| H | -3.54816300 | -3.37287600 | 3.95900400  |
| H | -4.14351200 | -3.52757300 | 2.29619900  |
| C | -3.08560100 | -1.64740700 | 2.71792900  |
| H | -3.82536100 | -1.02867900 | 3.23508400  |
| H | -3.15627200 | -1.41441000 | 1.65012000  |
| C | 0.75094400  | 0.23275200  | 3.40281900  |
| H | 0.35213400  | 0.44884100  | 4.40095500  |
| C | 1.75604800  | -0.93217600 | 3.54534200  |
| H | 1.48097300  | -1.62190500 | 4.34957400  |
| H | 1.81069400  | -1.51161400 | 2.61767200  |
| C | 3.10522900  | -0.24300700 | 3.77202200  |
| H | 3.17843100  | 0.11763900  | 4.80695300  |
| H | 3.95604700  | -0.90856800 | 3.58902900  |
| C | 3.04134300  | 0.93970700  | 2.80380800  |
| H | 3.21728100  | 0.58064300  | 1.78148800  |
| H | 3.78566400  | 1.71499400  | 3.01484700  |
| C | 1.59613600  | 1.45491900  | 2.92468600  |
| H | 1.24460000  | 1.86842600  | 1.97564300  |
| H | 1.53376700  | 2.25648600  | 3.67090100  |
| C | -1.66696300 | 1.50162900  | 2.66873900  |
| H | -0.97785400 | 2.27144400  | 2.30257900  |
| C | -1.99412200 | 1.79357300  | 4.16655900  |
| H | -1.69872600 | 0.99029300  | 4.84805500  |
| H | -1.45107600 | 2.68931400  | 4.49039200  |
| C | -3.51142900 | 2.04013800  | 4.22396600  |
| H | -4.03784500 | 1.09260200  | 4.39780900  |
| H | -3.79650200 | 2.72544800  | 5.02903300  |
| C | -3.85319800 | 2.56134100  | 2.82662900  |
| H | -3.54797700 | 3.61329600  | 2.73785800  |
| H | -4.92292800 | 2.50832800  | 2.59491200  |
| C | -3.00490900 | 1.67386100  | 1.91083400  |
| H | -2.85319700 | 2.08852100  | 0.91299000  |
| H | -3.51317100 | 0.72136500  | 1.75965300  |
| C | 1.34492600  | -0.04243700 | -3.21015200 |
| H | 1.92263100  | -0.58410800 | -3.97313100 |
| C | 2.20538200  | 1.14032300  | -2.73567500 |
| H | 3.24818500  | 0.86343200  | -2.55399900 |
| H | 1.79880200  | 1.55802000  | -1.80524000 |
| C | 2.04577600  | 2.13881800  | -3.88554600 |
| H | 2.40119800  | 3.14505400  | -3.63845900 |
| H | 2.62726800  | 1.79226600  | -4.75082700 |
| C | 0.54331400  | 2.08095800  | -4.19622100 |
| H | -0.00196900 | 2.76292600  | -3.53271100 |
| H | 0.31659300  | 2.37849000  | -5.22567400 |
| C | 0.11819400  | 0.62157000  | -3.89180300 |
| H | -0.15409400 | 0.07569700  | -4.80224300 |
| H | -0.75035600 | 0.60667600  | -3.23104300 |
| C | -0.07309100 | -2.49636600 | -2.95378700 |
| H | -0.87994800 | -1.86995400 | -3.34724100 |
| C | -0.74722400 | -3.66047100 | -2.16989600 |
| H | -0.30245600 | -3.82371500 | -1.18521600 |
| H | -1.80066200 | -3.41698200 | -1.99630600 |
| C | -0.60007600 | -4.90996900 | -3.06631200 |
| H | 0.23855200  | -5.52565300 | -2.71661500 |
| H | -1.49248600 | -5.54384100 | -3.05505100 |
| C | -0.27465500 | -4.35966800 | -4.46010800 |
| H | -1.19273500 | -4.01242400 | -4.95317400 |
| H | 0.19694200  | -5.09927000 | -5.11580000 |

|    |             |             |             |
|----|-------------|-------------|-------------|
| C  | 0.62981200  | −3.16222700 | −4.15258600 |
| H  | 0.74467200  | −2.47888400 | −5.00078200 |
| H  | 1.62868900  | −3.52807600 | −3.88266800 |
| C  | 2.53408100  | −2.13586500 | −1.65084300 |
| H  | 2.95519500  | −2.31421900 | −2.64758900 |
| C  | 3.55986600  | −1.28928700 | −0.83502400 |
| H  | 4.39932100  | −1.00857400 | −1.48057100 |
| H  | 3.12703600  | −0.36298100 | −0.44849500 |
| C  | 4.04170200  | −2.20050800 | 0.30828000  |
| H  | 5.08141700  | −2.00711700 | 0.59179100  |
| H  | 3.42212100  | −2.03440700 | 1.19859500  |
| C  | 3.80582700  | −3.62059900 | −0.21244800 |
| H  | 3.80313800  | −4.37668000 | 0.58002200  |
| H  | 4.58677100  | −3.89433200 | −0.93451500 |
| C  | 2.45188200  | −3.49357400 | −0.91734900 |
| H  | 1.66167000  | −3.47735400 | −0.15803800 |
| H  | 2.23438400  | −4.32064700 | −1.60159300 |
| P  | −0.72870100 | −0.06900700 | 2.31229000  |
| P  | 0.89784800  | −1.29645200 | −1.92321000 |
| Ru | −0.13517500 | −0.60942500 | 0.08013700  |
| H  | 1.19053500  | 0.15692800  | 0.39145300  |
| H  | −0.06991700 | −2.11811900 | 0.54142500  |
| H  | 1.01103500  | −1.41758300 | 0.74977700  |
| C  | −1.02144100 | 4.64867400  | −0.66569900 |
| C  | 0.39362800  | 4.29219900  | −0.08067700 |
| C  | −1.02484300 | 5.76540900  | −1.70080400 |
| H  | −2.04972900 | 5.95256800  | −2.03672800 |
| H  | −0.63331000 | 6.69520500  | −1.27362100 |
| H  | −0.42659400 | 5.50337200  | −2.57645200 |
| C  | 1.52001600  | 4.50849400  | −1.09115500 |
| H  | 1.72445000  | 5.57203300  | −1.25224800 |
| H  | 2.43196300  | 4.03345900  | −0.71709600 |
| H  | 1.27057800  | 4.05460400  | −2.05266500 |
| C  | −2.04598000 | 4.95206200  | 0.43019600  |
| H  | −1.87595400 | 5.93175200  | 0.88849300  |
| H  | −3.04943100 | 4.94184600  | −0.00603400 |
| H  | −2.01370500 | 4.19395100  | 1.21642500  |
| C  | 0.73842700  | 4.98372500  | 1.23297900  |
| H  | 1.74002000  | 4.68207900  | 1.55553000  |
| H  | 0.73410900  | 6.07308600  | 1.11537500  |
| H  | 0.03639000  | 4.71582400  | 2.02629000  |
| O  | −1.41147200 | 3.42408500  | −1.29645100 |
| O  | 0.28242700  | 2.88587600  | 0.15347300  |
| B  | −0.73935700 | 2.36734100  | −0.65721400 |
| O  | −1.04516000 | 1.09747700  | −0.79764600 |
| C  | −3.91324300 | −0.30654300 | −2.87826900 |
| C  | −4.55875200 | 0.34905400  | −1.59475000 |
| H  | −1.83908400 | −1.31197400 | −0.39005900 |
| C  | −3.78170000 | 0.63149400  | −4.07022600 |
| H  | −3.30170100 | 0.10326000  | −4.89969700 |
| H  | −4.76683700 | 0.96995900  | −4.40860800 |
| H  | −3.17278800 | 1.50456300  | −3.82694900 |
| C  | −4.41185400 | 1.86777700  | −1.54232200 |
| H  | −5.01554300 | 2.34845800  | −2.31896100 |
| H  | −4.76651800 | 2.22257800  | −0.56976900 |
| H  | −3.37257100 | 2.18349000  | −1.65344100 |
| C  | −4.58298200 | −1.61365700 | −3.30348300 |
| H  | −5.58703600 | −1.44429700 | −3.70450500 |

|                                                                    |             |             |             |
|--------------------------------------------------------------------|-------------|-------------|-------------|
| H                                                                  | -3.97607200 | -2.08323200 | -4.08381700 |
| H                                                                  | -4.65416800 | -2.31496400 | -2.46655300 |
| C                                                                  | -6.00977700 | -0.03983500 | -1.34619400 |
| H                                                                  | -6.36291800 | 0.44270900  | -0.42986200 |
| H                                                                  | -6.64653800 | 0.29571700  | -2.17161200 |
| H                                                                  | -6.12999900 | -1.11873700 | -1.22701700 |
| O                                                                  | -2.58751000 | -0.66181900 | -2.43322200 |
| O                                                                  | -3.75678200 | -0.20393900 | -0.52415300 |
| B                                                                  | -2.56968100 | -0.60270600 | -1.06813800 |
| <b>15Ru</b>                                                        |             |             |             |
| $G_{\text{solv}} = -2852.094360; E_{\text{solv}} = -2853.21961275$ |             |             |             |
| C                                                                  | -1.36343000 | -2.03160800 | 3.06884100  |
| H                                                                  | -1.70993300 | -1.82526000 | 4.08787800  |
| C                                                                  | 0.00891300  | -2.76862000 | 3.16851600  |
| H                                                                  | 0.80539000  | -2.25597700 | 2.62381600  |
| H                                                                  | 0.31882200  | -2.82384400 | 4.21821500  |
| C                                                                  | -0.23182500 | -4.18033000 | 2.60335500  |
| H                                                                  | -0.00090200 | -4.19350900 | 1.53014000  |
| H                                                                  | 0.39450400  | -4.93886700 | 3.08408400  |
| C                                                                  | -1.73140300 | -4.41686200 | 2.79637800  |
| H                                                                  | -1.94480000 | -4.66045200 | 3.84588400  |
| H                                                                  | -2.12290300 | -5.23115000 | 2.17741600  |
| C                                                                  | -2.33256600 | -3.05509700 | 2.43531100  |
| H                                                                  | -3.35922900 | -2.92434700 | 2.79301000  |
| H                                                                  | -2.34476300 | -2.95044000 | 1.34441900  |
| C                                                                  | -0.44154700 | 0.64959000  | 3.48735800  |
| H                                                                  | -0.89072800 | 0.36997500  | 4.45162200  |
| C                                                                  | 1.07950900  | 0.44560900  | 3.59564300  |
| H                                                                  | 1.34984000  | -0.49671200 | 4.08161000  |
| H                                                                  | 1.53218200  | 0.45876300  | 2.59681300  |
| C                                                                  | 1.53571300  | 1.67448400  | 4.38616800  |
| H                                                                  | 1.28258400  | 1.54947400  | 5.44754300  |
| H                                                                  | 2.61628500  | 1.84362200  | 4.32015700  |
| C                                                                  | 0.71857100  | 2.81776200  | 3.76880900  |
| H                                                                  | 1.26216900  | 3.20888400  | 2.90444800  |
| H                                                                  | 0.56227500  | 3.64916300  | 4.46441300  |
| C                                                                  | -0.61117400 | 2.18062400  | 3.29266400  |
| H                                                                  | -0.80856200 | 2.43201700  | 2.24741400  |
| H                                                                  | -1.46891200 | 2.54469100  | 3.86887100  |
| C                                                                  | -3.01881700 | 0.28339100  | 2.30047400  |
| H                                                                  | -2.86875800 | 1.34438400  | 2.07742500  |
| C                                                                  | -3.78734100 | 0.15764000  | 3.64595300  |
| H                                                                  | -3.36604500 | -0.59879600 | 4.31511100  |
| H                                                                  | -3.74687800 | 1.10893600  | 4.18773300  |
| C                                                                  | -5.24161700 | -0.20309500 | 3.26134500  |
| H                                                                  | -5.40238100 | -1.28172000 | 3.38312000  |
| H                                                                  | -5.98153300 | 0.30622900  | 3.88708000  |
| C                                                                  | -5.35781100 | 0.15877900  | 1.77537200  |
| H                                                                  | -5.51114600 | 1.24078000  | 1.66222200  |
| H                                                                  | -6.18867800 | -0.35058200 | 1.27509400  |
| C                                                                  | -3.98667300 | -0.22594400 | 1.21438200  |
| H                                                                  | -3.76308900 | 0.23187000  | 0.24734600  |
| H                                                                  | -3.92950300 | -1.31317400 | 1.08836500  |
| C                                                                  | 0.75236400  | -0.28247400 | -3.49335200 |
| H                                                                  | 1.31352500  | -0.87761700 | -4.22894400 |
| C                                                                  | 1.46459500  | 1.06815900  | -3.33015100 |
| H                                                                  | 2.54732300  | 0.96484200  | -3.20481700 |
| H                                                                  | 1.06265100  | 1.60030400  | -2.46613100 |

|    |             |             |             |
|----|-------------|-------------|-------------|
| C  | 1.08751300  | 1.82526700  | −4.60933000 |
| H  | 1.17761000  | 2.90929900  | −4.48411800 |
| H  | 1.75935000  | 1.53043200  | −5.42572600 |
| C  | −0.36038000 | 1.38711100  | −4.92280600 |
| H  | −1.06800500 | 2.16317300  | −4.62038000 |
| H  | −0.49954700 | 1.21492600  | −5.99548300 |
| C  | −0.61329900 | 0.10075700  | −4.09900500 |
| H  | −1.02718100 | −0.70920300 | −4.70919300 |
| H  | −1.32502200 | 0.31385000  | −3.29477700 |
| C  | −0.30993800 | −2.77838400 | −2.67069900 |
| H  | −1.26817100 | −2.33409100 | −2.96781500 |
| C  | −0.62572900 | −3.94729200 | −1.68878800 |
| H  | −0.02219000 | −3.91207600 | −0.78026400 |
| H  | −1.66936500 | −3.88231700 | −1.36473800 |
| C  | −0.36371800 | −5.24739800 | −2.47875100 |
| H  | 0.62889400  | −5.64323200 | −2.22860500 |
| H  | −1.09162000 | −6.03201000 | −2.24937500 |
| C  | −0.38038500 | −4.82344200 | −3.95084600 |
| H  | −1.41516600 | −4.71573000 | −4.30213800 |
| H  | 0.12293200  | −5.53713800 | −4.61134200 |
| C  | 0.29939200  | −3.45204500 | −3.91799100 |
| H  | 0.13502000  | −2.86993400 | −4.83040700 |
| H  | 1.38261900  | −3.58912900 | −3.80339000 |
| C  | 2.36477800  | −1.90632700 | −1.76268400 |
| H  | 2.73743500  | −2.16453700 | −2.76147100 |
| C  | 3.27935000  | −0.79948900 | −1.15724000 |
| H  | 3.97277000  | −0.42813200 | −1.91980100 |
| H  | 2.70772300  | 0.05882200  | −0.79516300 |
| C  | 4.04348700  | −1.46696500 | 0.00363600  |
| H  | 5.06679000  | −1.08952500 | 0.10568500  |
| H  | 3.52136900  | −1.26744100 | 0.94755800  |
| C  | 3.98160200  | −2.96551100 | −0.30591200 |
| H  | 4.18048100  | −3.59489800 | 0.56806100  |
| H  | 4.71491300  | −3.22557200 | −1.08121000 |
| C  | 2.55854200  | −3.13280200 | −0.84645200 |
| H  | 1.85975100  | −3.09519500 | −0.00305600 |
| H  | 2.39842600  | −4.07805200 | −1.37608000 |
| P  | −1.29451200 | −0.38570400 | 2.20370700  |
| P  | 0.61292100  | −1.32473400 | −1.96458500 |
| Ru | −0.36306600 | −0.55162700 | 0.04532200  |
| H  | 0.94606600  | −1.08193400 | 0.76633200  |
| H  | −1.47801600 | −1.60984000 | −0.22363100 |
| H  | −0.20866100 | −2.04824500 | 0.41848200  |
| C  | 2.54019200  | 4.31542000  | −0.19239400 |
| C  | 3.39232500  | 3.13270100  | 0.41329500  |
| C  | 3.19399500  | 5.02978300  | −1.36765600 |
| H  | 2.53205700  | 5.82326800  | −1.72696100 |
| H  | 4.14078500  | 5.48938000  | −1.06484400 |
| H  | 3.38293600  | 4.34875100  | −2.20007100 |
| C  | 4.34128700  | 2.49480300  | −0.60116900 |
| H  | 5.16742700  | 3.16614100  | −0.85437900 |
| H  | 4.75891100  | 1.58113700  | −0.16905400 |
| H  | 3.81741600  | 2.22220500  | −1.52178200 |
| C  | 2.08465000  | 5.34165100  | 0.84564700  |
| H  | 2.92707000  | 5.92056600  | 1.23616200  |
| H  | 1.38210800  | 6.03456900  | 0.37361400  |
| H  | 1.56853500  | 4.86728600  | 1.68444200  |
| C  | 4.14972100  | 3.48161800  | 1.68645200  |

|                                                                       |             |             |             |
|-----------------------------------------------------------------------|-------------|-------------|-------------|
| H                                                                     | 4.68515500  | 2.59831500  | 2.04735200  |
| H                                                                     | 4.88511600  | 4.27044500  | 1.49585200  |
| H                                                                     | 3.47701800  | 3.81670700  | 2.47868000  |
| O                                                                     | 1.35982100  | 3.64131800  | −0.66963300 |
| O                                                                     | 2.38899300  | 2.14712800  | 0.73204200  |
| B                                                                     | 1.27096500  | 2.43548700  | −0.01559000 |
| O                                                                     | 0.21775800  | 1.59610500  | −0.08496300 |
| C                                                                     | −2.40709900 | 3.18491000  | −1.93622300 |
| C                                                                     | −2.61215100 | 3.56638300  | −0.42693300 |
| H                                                                     | −1.58047000 | 0.49213100  | −0.75614100 |
| C                                                                     | −2.19258400 | 4.37859700  | −2.85900100 |
| H                                                                     | −2.11578400 | 4.04256000  | −3.89786400 |
| H                                                                     | −3.03306500 | 5.07912100  | −2.79479900 |
| H                                                                     | −1.27110400 | 4.90812700  | −2.60764500 |
| C                                                                     | −1.80254200 | 4.80015500  | −0.01343400 |
| H                                                                     | −2.22039900 | 5.72301000  | −0.43061500 |
| H                                                                     | −1.81878800 | 4.88116400  | 1.07876900  |
| H                                                                     | −0.76135300 | 4.70463800  | −0.33279000 |
| C                                                                     | −3.53679100 | 2.30277700  | −2.48229900 |
| H                                                                     | −4.47369400 | 2.85849800  | −2.59556300 |
| H                                                                     | −3.24325000 | 1.92473700  | −3.46664200 |
| H                                                                     | −3.71962500 | 1.44168700  | −1.83154000 |
| C                                                                     | −4.06762400 | 3.73290900  | −0.00456400 |
| H                                                                     | −4.11497600 | 3.99109500  | 1.05872700  |
| H                                                                     | −4.55497900 | 4.53627300  | −0.56872400 |
| H                                                                     | −4.63132000 | 2.80843200  | −0.15174500 |
| O                                                                     | −1.21282000 | 2.40941800  | −1.89727500 |
| O                                                                     | −2.07297200 | 2.43455700  | 0.24818700  |
| B                                                                     | −1.14947200 | 1.77274300  | −0.62356100 |
| TS <sub>15,16-Ru</sub>                                                |             |             |             |
| $G_{\text{solv}} = -2852.087273$ ; $E_{\text{solv}} = -2853.20850495$ |             |             |             |
| C                                                                     | −1.33874200 | −1.88221600 | 3.03253900  |
| H                                                                     | −1.71115800 | −1.68723000 | 4.04494400  |
| C                                                                     | 0.03600900  | −2.61164300 | 3.15673000  |
| H                                                                     | 0.83208600  | −2.09626100 | 2.61435300  |
| H                                                                     | 0.33260400  | −2.65865600 | 4.21095100  |
| C                                                                     | −0.18698700 | −4.02804500 | 2.59533100  |
| H                                                                     | 0.07297100  | −4.04579700 | 1.52915900  |
| H                                                                     | 0.42775300  | −4.78233200 | 3.09768600  |
| C                                                                     | −1.69039900 | −4.26844500 | 2.74807100  |
| H                                                                     | −1.93237800 | −4.51174900 | 3.79172100  |
| H                                                                     | −2.06299800 | −5.08426000 | 2.11915600  |
| C                                                                     | −2.28457200 | −2.90852500 | 2.36948100  |
| H                                                                     | −3.32192300 | −2.78420600 | 2.69713900  |
| H                                                                     | −2.26226600 | −2.80157400 | 1.27903500  |
| C                                                                     | −0.40970800 | 0.77795700  | 3.50710500  |
| H                                                                     | −0.89801600 | 0.49471700  | 4.45032100  |
| C                                                                     | 1.10313900  | 0.54699900  | 3.67298400  |
| H                                                                     | 1.33337700  | −0.38974000 | 4.18883800  |
| H                                                                     | 1.58875500  | 0.52163700  | 2.69008000  |
| C                                                                     | 1.56325100  | 1.78230800  | 4.45073700  |
| H                                                                     | 1.26480500  | 1.69683400  | 5.50444600  |
| H                                                                     | 2.65009600  | 1.92117900  | 4.42321200  |
| C                                                                     | 0.80120200  | 2.92321400  | 3.76753200  |
| H                                                                     | 1.36179000  | 3.22872300  | 2.87907900  |
| H                                                                     | 0.68435500  | 3.80621900  | 4.40535100  |
| C                                                                     | −0.55353800 | 2.31584000  | 3.33085100  |
| H                                                                     | −0.78404300 | 2.59044900  | 2.29891400  |

|   |             |             |             |
|---|-------------|-------------|-------------|
| H | -1.38132600 | 2.68991000  | 3.94360900  |
| C | -2.96563700 | 0.45874600  | 2.29697100  |
| H | -2.81525000 | 1.51597400  | 2.05407400  |
| C | -3.70458800 | 0.36448700  | 3.66438000  |
| H | -3.21741900 | -0.30880000 | 4.37622900  |
| H | -3.72980000 | 1.35149700  | 4.13993800  |
| C | -5.13318100 | -0.12094600 | 3.33722300  |
| H | -5.19507000 | -1.20968000 | 3.46083000  |
| H | -5.89065200 | 0.32299900  | 3.99150100  |
| C | -5.32781200 | 0.22926200  | 1.85819900  |
| H | -5.55009900 | 1.30075100  | 1.75464100  |
| H | -6.14641100 | -0.32740300 | 1.38868700  |
| C | -3.95911500 | -0.08091900 | 1.24617400  |
| H | -3.79314300 | 0.38499200  | 0.27221700  |
| H | -3.85463300 | -1.16151200 | 1.10299800  |
| C | 0.85937700  | -0.11614300 | -3.46706700 |
| H | 1.40172400  | -0.72236600 | -4.20733400 |
| C | 1.62171200  | 1.20431600  | -3.28797400 |
| H | 2.69854000  | 1.06036800  | -3.15602600 |
| H | 1.23715200  | 1.73714900  | -2.41469800 |
| C | 1.27908800  | 1.98923300  | -4.55933900 |
| H | 1.42915200  | 3.06699000  | -4.43490700 |
| H | 1.92931200  | 1.65929600  | -5.37966500 |
| C | -0.19117300 | 1.62735200  | -4.86269400 |
| H | -0.85503100 | 2.42772600  | -4.52485500 |
| H | -0.35582300 | 1.49663200  | -5.93758700 |
| C | -0.48756700 | 0.32887400  | -4.07159100 |
| H | -0.92573800 | -0.45138600 | -4.70313700 |
| H | -1.19400800 | 0.53559600  | -3.26125100 |
| C | -0.30342700 | -2.57255700 | -2.67890100 |
| H | -1.24220200 | -2.08538900 | -2.97059700 |
| C | -0.67026700 | -3.74007700 | -1.71279400 |
| H | -0.06964600 | -3.73930200 | -0.80183000 |
| H | -1.71111000 | -3.63460300 | -1.39052500 |
| C | -0.46144200 | -5.04014700 | -2.51839600 |
| H | 0.51318100  | -5.48103700 | -2.27206000 |
| H | -1.22196800 | -5.79680100 | -2.30052900 |
| C | -0.45711200 | -4.59751500 | -3.98520100 |
| H | -1.48602600 | -4.44183100 | -4.33623800 |
| H | 0.01665700  | -5.32362700 | -4.65435700 |
| C | 0.27979200  | -3.25634200 | -3.93270900 |
| H | 0.14408900  | -2.65689200 | -4.83887500 |
| H | 1.35573500  | -3.44170400 | -3.81740500 |
| C | 2.39942300  | -1.82380400 | -1.76623700 |
| H | 2.74681200  | -2.10588000 | -2.76796100 |
| C | 3.37405300  | -0.75953600 | -1.18050700 |
| H | 4.07024300  | -0.41875100 | -1.95557400 |
| H | 2.84138800  | 0.11857200  | -0.80629400 |
| C | 4.12554000  | -1.45642600 | -0.02843300 |
| H | 5.16949800  | -1.13283400 | 0.05203700  |
| H | 3.62769500  | -1.22161600 | 0.92041900  |
| C | 3.98086500  | -2.95294200 | -0.32105500 |
| H | 4.15709400  | -3.58221100 | 0.55809200  |
| H | 4.69035400  | -3.26021600 | -1.10161000 |
| C | 2.54431800  | -3.05030800 | -0.84237200 |
| H | 1.85807700  | -2.96532700 | 0.00746300  |
| H | 2.33067100  | -3.99094000 | -1.36166500 |
| P | -1.24247500 | -0.22790700 | 2.17801200  |

|                                                                       |             |             |             |
|-----------------------------------------------------------------------|-------------|-------------|-------------|
| P                                                                     | 0.66874900  | −1.16409700 | −1.94182900 |
| Ru                                                                    | −0.29697200 | −0.38643100 | 0.04198800  |
| H                                                                     | 1.13240500  | −0.67043300 | 0.79107000  |
| H                                                                     | −1.44002400 | −1.40408400 | −0.24469300 |
| H                                                                     | −0.08582400 | −1.87255800 | 0.43747000  |
| C                                                                     | 2.73127900  | 4.42969600  | −0.07971300 |
| C                                                                     | 3.51658300  | 3.16063200  | 0.44935300  |
| C                                                                     | 3.40235900  | 5.14736500  | −1.24277200 |
| H                                                                     | 2.78601300  | 5.99621400  | −1.55270700 |
| H                                                                     | 4.38312400  | 5.53214900  | −0.94481400 |
| H                                                                     | 3.52904100  | 4.49048900  | −2.10575300 |
| C                                                                     | 4.43829700  | 2.53753700  | −0.59733200 |
| H                                                                     | 5.29004200  | 3.18798700  | −0.81697900 |
| H                                                                     | 4.81993800  | 1.58832500  | −0.21232400 |
| H                                                                     | 3.90552500  | 2.33087700  | −1.52979700 |
| C                                                                     | 2.37307500  | 5.43728600  | 1.01164100  |
| H                                                                     | 3.26452300  | 5.93731200  | 1.40188400  |
| H                                                                     | 1.71143400  | 6.19780800  | 0.58695900  |
| H                                                                     | 1.84579300  | 4.96493200  | 1.84425000  |
| C                                                                     | 4.27761700  | 3.38283400  | 1.74803200  |
| H                                                                     | 4.75147400  | 2.44661300  | 2.05700300  |
| H                                                                     | 5.06293800  | 4.13373100  | 1.61201700  |
| H                                                                     | 3.61820500  | 3.71020400  | 2.55422700  |
| O                                                                     | 1.48956200  | 3.86161300  | −0.55382200 |
| O                                                                     | 2.46071300  | 2.20360600  | 0.70111600  |
| B                                                                     | 1.36529900  | 2.61797800  | 0.00564600  |
| O                                                                     | 0.23097500  | 1.87028100  | −0.12297500 |
| C                                                                     | −2.50510000 | 3.31988300  | −1.97895900 |
| C                                                                     | −2.77049000 | 3.75877700  | −0.48996400 |
| H                                                                     | −1.60350500 | 0.30730500  | −0.75629700 |
| C                                                                     | −2.48742900 | 4.47065400  | −2.97467000 |
| H                                                                     | −2.32843800 | 4.08627900  | −3.98623100 |
| H                                                                     | −3.44588900 | 5.00072700  | −2.96474500 |
| H                                                                     | −1.68887500 | 5.18182400  | −2.75349100 |
| C                                                                     | −2.25070400 | 5.16199300  | −0.17346600 |
| H                                                                     | −2.85200000 | 5.93658600  | −0.65894100 |
| H                                                                     | −2.29689300 | 5.31892200  | 0.90843300  |
| H                                                                     | −1.20807200 | 5.27634700  | −0.48569600 |
| C                                                                     | −3.44886600 | 2.22008500  | −2.46390900 |
| H                                                                     | −4.47272800 | 2.59244700  | −2.56621800 |
| H                                                                     | −3.11425700 | 1.87178900  | −3.44521000 |
| H                                                                     | −3.44627800 | 1.36257500  | −1.78567500 |
| C                                                                     | −4.21216400 | 3.60933400  | −0.02930200 |
| H                                                                     | −4.29736900 | 3.91580200  | 1.01772700  |
| H                                                                     | −4.87640200 | 4.24618400  | −0.62335600 |
| H                                                                     | −4.55308500 | 2.57541400  | −0.11042800 |
| O                                                                     | −1.17822400 | 2.75443400  | −1.90026100 |
| O                                                                     | −1.94817300 | 2.84106400  | 0.25775000  |
| B                                                                     | −0.98665800 | 2.36468000  | −0.60121500 |
| <b>16Ru</b>                                                           |             |             |             |
| $G_{\text{solv}} = -2852.088112$ ; $E_{\text{solv}} = -2853.20856201$ |             |             |             |
| C                                                                     | −1.25446900 | −2.38817400 | 3.06734600  |
| H                                                                     | −1.63083700 | −2.19674800 | 4.07901200  |
| C                                                                     | 0.12203300  | −3.11407200 | 3.19324200  |
| H                                                                     | 0.91726700  | −2.59501100 | 2.65290800  |
| H                                                                     | 0.41678300  | −3.16210100 | 4.24795100  |
| C                                                                     | −0.09567500 | −4.53001700 | 2.62844200  |
| H                                                                     | 0.16835500  | −4.54514300 | 1.56325100  |

|   |             |             |             |
|---|-------------|-------------|-------------|
| H | 0.51885900  | −5.28382700 | 3.13179200  |
| C | −1.59910000 | −4.77439100 | 2.77500400  |
| H | −1.84441100 | −5.02107200 | 3.81710200  |
| H | −1.96739600 | −5.58943900 | 2.14254300  |
| C | −2.19522400 | −3.41490700 | 2.39787900  |
| H | −3.23422000 | −3.29425000 | 2.72178600  |
| H | −2.16863300 | −3.30455200 | 1.30787300  |
| C | −0.32727100 | 0.27065500  | 3.55134600  |
| H | −0.81790400 | −0.01591000 | 4.49234500  |
| C | 1.18536800  | 0.04338400  | 3.72216900  |
| H | 1.41636700  | −0.89495500 | 4.23477800  |
| H | 1.67427600  | 0.02366600  | 2.74081100  |
| C | 1.63851800  | 1.27651700  | 4.50745700  |
| H | 1.33549000  | 1.18586500  | 5.55942200  |
| H | 2.72509200  | 1.41862000  | 4.48572900  |
| C | 0.87644600  | 2.41829100  | 3.82569300  |
| H | 1.44040600  | 2.72969500  | 2.94141800  |
| H | 0.75353000  | 3.29800900  | 4.46690600  |
| C | −0.47396100 | 1.80858000  | 3.37900400  |
| H | −0.69820700 | 2.08566600  | 2.34636300  |
| H | −1.30677500 | 2.17909400  | 3.98708200  |
| C | −2.87846400 | −0.04301800 | 2.33550400  |
| H | −2.72714700 | 1.01443600  | 2.09326100  |
| C | −3.61684300 | −0.13701300 | 3.70355400  |
| H | −3.12359000 | −0.80198200 | 4.41899800  |
| H | −3.65120000 | 0.85229000  | 4.17383700  |
| C | −5.04094300 | −0.63608100 | 3.37913200  |
| H | −5.09112200 | −1.72582700 | 3.49930000  |
| H | −5.80121100 | −0.20193200 | 4.03675000  |
| C | −5.24196400 | −0.28319700 | 1.90179900  |
| H | −5.47149400 | 0.78721900  | 1.80201500  |
| H | −6.05809200 | −0.84377000 | 1.43263700  |
| C | −3.87283300 | −0.58317800 | 1.28564600  |
| H | −3.71246600 | −0.11333300 | 0.31267400  |
| H | −3.76256400 | −1.66245800 | 1.13738300  |
| C | 0.94077700  | −0.59599500 | −3.42381100 |
| H | 1.47981300  | −1.19709400 | −4.17065600 |
| C | 1.70299100  | 0.72377300  | −3.23945800 |
| H | 2.78051200  | 0.57999600  | −3.11342800 |
| H | 1.32250200  | 1.24894700  | −2.35976000 |
| C | 1.35449400  | 1.51853200  | −4.50330500 |
| H | 1.49881300  | 2.59581900  | −4.36865500 |
| H | 2.00616400  | 1.20022700  | −5.32698000 |
| C | −0.11412800 | 1.15164800  | −4.81039500 |
| H | −0.78231800 | 1.95063300  | −4.47753100 |
| H | −0.27404200 | 1.01782900  | −5.88562600 |
| C | −0.40880400 | −0.14665100 | −4.01861800 |
| H | −0.85430200 | −0.92473500 | −4.64773800 |
| H | −1.10864000 | 0.06081300  | −3.20264900 |
| C | −0.21288500 | −3.06028700 | −2.64670700 |
| H | −1.15400700 | −2.57431200 | −2.93266800 |
| C | −0.57346500 | −4.23415500 | −1.68583700 |
| H | 0.02822000  | −4.23538900 | −0.77560400 |
| H | −1.61433900 | −4.13455300 | −1.36177300 |
| C | −0.36082600 | −5.52926500 | −2.49828000 |
| H | 0.61670000  | −5.96657700 | −2.25706100 |
| H | −1.11700100 | −6.29069400 | −2.28179100 |
| C | −0.36314200 | −5.07942000 | −3.96290000 |

|    |             |             |             |
|----|-------------|-------------|-------------|
| H  | -1.39388500 | -4.92632900 | -4.30971300 |
| H  | 0.11143700  | -5.80024600 | -4.63720700 |
| C  | 0.36841500  | -3.73547500 | -3.90606500 |
| H  | 0.22710100  | -3.13191200 | -4.80868700 |
| H  | 1.44548000  | -3.91723300 | -3.79567800 |
| C  | 2.48996300  | -2.31014100 | -1.73767900 |
| H  | 2.83400700  | -2.58810000 | -2.74170000 |
| C  | 3.46516100  | -1.24651900 | -1.15200600 |
| H  | 4.15915100  | -0.90325100 | -1.92803300 |
| H  | 2.93214200  | -0.37028700 | -0.77390500 |
| C  | 4.22007700  | -1.94527300 | -0.00345600 |
| H  | 5.26355700  | -1.61981700 | 0.07633700  |
| H  | 3.72267900  | -1.71431900 | 0.94659100  |
| C  | 4.07778600  | -3.44113600 | -0.30038200 |
| H  | 4.25734500  | -4.07279100 | 0.57639300  |
| H  | 4.78599500  | -3.74458100 | -1.08362300 |
| C  | 2.64010400  | -3.53953300 | -0.81837200 |
| H  | 1.95598100  | -3.45866200 | 0.03362000  |
| H  | 2.42692400  | -4.47886700 | -1.34023000 |
| P  | -1.15552900 | -0.73228400 | 2.21639200  |
| P  | 0.75693600  | -1.65313500 | -1.90347400 |
| Ru | -0.20764500 | -0.88794400 | 0.08205300  |
| H  | 1.23684000  | -1.12348500 | 0.83022800  |
| H  | -1.34225300 | -1.91431900 | -0.20132300 |
| H  | 0.02841300  | -2.36872400 | 0.47978100  |
| C  | 2.81586700  | 3.93881900  | -0.01495400 |
| C  | 3.59327700  | 2.66278000  | 0.50883300  |
| C  | 3.49463600  | 4.66148000  | -1.17034100 |
| H  | 2.88300800  | 5.51489500  | -1.47708200 |
| H  | 4.47569600  | 5.04023800  | -0.86578200 |
| H  | 3.62218100  | 4.00988300  | -2.03718200 |
| C  | 4.51698800  | 2.04315600  | -0.53797300 |
| H  | 5.37146200  | 2.69249100  | -0.75012100 |
| H  | 4.89432700  | 1.09056800  | -0.15728300 |
| H  | 3.98734600  | 1.84391200  | -1.47382000 |
| C  | 2.45659000  | 4.94048100  | 1.08142800  |
| H  | 3.34815200  | 5.43536500  | 1.47787900  |
| H  | 1.79869400  | 5.70555600  | 0.65904200  |
| H  | 1.92500700  | 4.46461100  | 1.90929200  |
| C  | 4.34937800  | 2.87260300  | 1.81237600  |
| H  | 4.81729200  | 1.93203300  | 2.11705000  |
| H  | 5.13874500  | 3.62073500  | 1.68486300  |
| H  | 3.68799600  | 3.19764300  | 2.61783100  |
| O  | 1.57396100  | 3.37855000  | -0.49818500 |
| O  | 2.53202200  | 1.70808200  | 0.74977700  |
| B  | 1.44182900  | 2.13211700  | 0.05377500  |
| O  | 0.29718700  | 1.39872000  | -0.08540400 |
| C  | -2.44136500 | 2.85255200  | -1.93269200 |
| C  | -2.70909100 | 3.29433100  | -0.44422500 |
| H  | -1.53777800 | -0.26286000 | -0.71796600 |
| C  | -2.44194000 | 3.99834100  | -2.93389200 |
| H  | -2.27523600 | 3.61111800  | -3.94306700 |
| H  | -3.40927000 | 4.51194300  | -2.92755500 |
| H  | -1.65613700 | 4.72451800  | -2.71596200 |
| C  | -2.21870600 | 4.70977100  | -0.13648400 |
| H  | -2.83798400 | 5.46797000  | -0.62503900 |
| H  | -2.26607200 | 4.87204500  | 0.94447900  |
| H  | -1.17957000 | 4.84622900  | -0.45174500 |

|                                                                       |             |            |             |
|-----------------------------------------------------------------------|-------------|------------|-------------|
| C                                                                     | -3.36802900 | 1.73566200 | -2.41006400 |
| H                                                                     | -4.39890600 | 2.08967200 | -2.50629500 |
| H                                                                     | -3.03351700 | 1.39151500 | -3.39278900 |
| H                                                                     | -3.34534500 | 0.87941900 | -1.73053500 |
| C                                                                     | -4.14414400 | 3.11420300 | 0.02532600  |
| H                                                                     | -4.22987200 | 3.42236300 | 1.07172600  |
| H                                                                     | -4.82550300 | 3.73414800 | -0.56705700 |
| H                                                                     | -4.46255300 | 2.07279300 | -0.05031000 |
| O                                                                     | -1.10518000 | 2.30435800 | -1.85573600 |
| O                                                                     | -1.86196600 | 2.39815700 | 0.30510400  |
| B                                                                     | -0.89839600 | 1.94127000 | -0.55532600 |
| <b>1Ru-HBpin</b>                                                      |             |            |             |
| $G_{\text{solv}} = -2366.374469$ ; $E_{\text{solv}} = -2367.32746861$ |             |            |             |
| C                                                                     | 16.10271100 | 3.76966500 | 6.99581900  |
| H                                                                     | 17.02262600 | 4.17613900 | 7.43392200  |
| C                                                                     | 16.48912700 | 2.97599300 | 5.70922100  |
| H                                                                     | 15.92171000 | 3.29591400 | 4.83226000  |
| H                                                                     | 17.54835300 | 3.13628300 | 5.48261400  |
| C                                                                     | 16.22231500 | 1.49224600 | 6.03257200  |
| H                                                                     | 15.21989800 | 1.20816300 | 5.68361100  |
| H                                                                     | 16.93788100 | 0.82082200 | 5.54718500  |
| C                                                                     | 16.25775500 | 1.41863600 | 7.56119100  |
| H                                                                     | 17.29601300 | 1.43338800 | 7.91829500  |
| H                                                                     | 15.77873500 | 0.51934600 | 7.96238600  |
| C                                                                     | 15.54222200 | 2.70880900 | 7.96929800  |
| H                                                                     | 15.69742500 | 2.98310600 | 9.01757900  |
| H                                                                     | 14.46328400 | 2.57840600 | 7.82097600  |
| C                                                                     | 16.13668000 | 6.47876000 | 5.99150400  |
| H                                                                     | 16.95486500 | 6.59207700 | 6.71299700  |
| C                                                                     | 16.73783200 | 6.09497100 | 4.61700800  |
| H                                                                     | 17.70187400 | 5.58573900 | 4.71640900  |
| H                                                                     | 16.06005500 | 5.42408200 | 4.07885400  |
| C                                                                     | 16.82854100 | 7.41892200 | 3.84875000  |
| H                                                                     | 17.70445300 | 7.99493000 | 4.17684500  |
| H                                                                     | 16.91109800 | 7.27233500 | 2.76643200  |
| C                                                                     | 15.54298500 | 8.13509000 | 4.26731200  |
| H                                                                     | 14.68859100 | 7.67429000 | 3.75539200  |
| H                                                                     | 15.54036000 | 9.20508800 | 4.03249800  |
| C                                                                     | 15.44355300 | 7.85701300 | 5.77470500  |
| H                                                                     | 14.40713900 | 7.86430600 | 6.11889600  |
| H                                                                     | 15.97786100 | 8.62986800 | 6.34120300  |
| C                                                                     | 14.75352800 | 5.93253600 | 8.42869500  |
| H                                                                     | 14.37975600 | 6.94037100 | 8.22310500  |
| C                                                                     | 15.98899800 | 6.06628500 | 9.34145900  |
| H                                                                     | 16.61394000 | 5.16475300 | 9.31607000  |
| H                                                                     | 16.62276200 | 6.91583300 | 9.06567500  |
| C                                                                     | 15.37239400 | 6.20823300 | 10.73724000 |
| H                                                                     | 16.09555600 | 6.05283600 | 11.54494900 |
| H                                                                     | 14.95221400 | 7.21608400 | 10.85416000 |
| C                                                                     | 14.24692000 | 5.16672200 | 10.72443200 |
| H                                                                     | 13.48780000 | 5.34974900 | 11.49186800 |
| H                                                                     | 14.67153900 | 4.17380500 | 10.92140000 |
| C                                                                     | 13.67001600 | 5.22426100 | 9.29323600  |
| H                                                                     | 12.74872800 | 5.81206500 | 9.25120200  |
| H                                                                     | 13.41468000 | 4.22756700 | 8.92388000  |
| C                                                                     | 9.88346900  | 3.36086400 | 4.17886900  |
| H                                                                     | 9.51374300  | 2.83007000 | 3.29351900  |
| C                                                                     | 8.86801600  | 4.47108100 | 4.51954500  |

|    |             |             |             |
|----|-------------|-------------|-------------|
| H  | 8.41354400  | 4.90086700  | 3.62036200  |
| H  | 9.35292300  | 5.28138500  | 5.06975800  |
| C  | 7.85853000  | 3.77169100  | 5.43468400  |
| H  | 7.22863700  | 4.47583500  | 5.99032300  |
| H  | 7.19475900  | 3.11978600  | 4.85024400  |
| C  | 8.76166100  | 2.93124400  | 6.34105400  |
| H  | 9.22142300  | 3.58313700  | 7.09469600  |
| H  | 8.22827200  | 2.13517700  | 6.87104300  |
| C  | 9.85300400  | 2.38839100  | 5.39666300  |
| H  | 9.61240300  | 1.37345300  | 5.06010700  |
| H  | 10.81840300 | 2.33810800  | 5.91233300  |
| C  | 12.26503600 | 2.27274700  | 3.13615500  |
| H  | 12.15888200 | 1.61795100  | 4.01159200  |
| C  | 13.76304600 | 2.22994100  | 2.70103800  |
| H  | 14.18711200 | 3.22292700  | 2.55048300  |
| H  | 14.36314600 | 1.76335800  | 3.48949400  |
| C  | 13.80795500 | 1.39331400  | 1.40523800  |
| H  | 13.83055600 | 2.05764600  | 0.53188600  |
| H  | 14.69549300 | 0.75523400  | 1.34788300  |
| C  | 12.49705900 | 0.60201900  | 1.40383000  |
| H  | 12.57790500 | −0.26560100 | 2.07216200  |
| H  | 12.21508700 | 0.23301500  | 0.41220800  |
| C  | 11.49252200 | 1.60506900  | 1.97727300  |
| H  | 10.56384900 | 1.13088100  | 2.30925900  |
| H  | 11.23191500 | 2.33696300  | 1.20210300  |
| C  | 11.38270200 | 4.94364900  | 2.25221300  |
| H  | 10.69579400 | 4.39009200  | 1.60091300  |
| C  | 10.77369100 | 6.35297000  | 2.53253700  |
| H  | 9.79755400  | 6.42899400  | 2.03942300  |
| H  | 10.61738200 | 6.54983600  | 3.59364300  |
| C  | 11.76011800 | 7.36383400  | 1.92166600  |
| H  | 11.26328100 | 8.27117100  | 1.56156000  |
| H  | 12.49396100 | 7.66592900  | 2.68042600  |
| C  | 12.46855300 | 6.57923400  | 0.81575700  |
| H  | 13.40240300 | 7.04449500  | 0.48230200  |
| H  | 11.81136500 | 6.47988400  | −0.05874200 |
| C  | 12.69166100 | 5.21459000  | 1.47378400  |
| H  | 13.53340700 | 5.29671300  | 2.17078500  |
| H  | 12.92193700 | 4.41690800  | 0.75934000  |
| P  | 14.97662600 | 5.22650300  | 6.72591000  |
| P  | 11.61539100 | 3.90811500  | 3.77535600  |
| Ru | 13.06359600 | 4.71784400  | 5.45718100  |
| H  | 14.12082200 | 4.63946500  | 4.24930800  |
| H  | 12.78370500 | 6.34183100  | 5.07840400  |
| H  | 13.06101200 | 3.15810800  | 6.09916300  |
| H  | 13.67827100 | 3.15143200  | 5.43377400  |
| C  | 10.14883100 | 7.88872600  | 6.59893800  |
| C  | 11.48256100 | 8.49528800  | 7.14426100  |
| H  | 11.88009000 | 5.12983800  | 6.69566400  |
| C  | 9.29337300  | 8.84361400  | 5.77705100  |
| H  | 8.38740500  | 8.32963700  | 5.44021400  |
| H  | 8.98922000  | 9.71017300  | 6.37451100  |
| H  | 9.82765200  | 9.19654500  | 4.89208100  |
| C  | 12.10090600 | 9.51533300  | 6.18268600  |
| H  | 11.51310100 | 10.43798200 | 6.13949100  |
| H  | 13.10667200 | 9.77125700  | 6.52877700  |
| H  | 12.18389400 | 9.10706300  | 5.17030300  |
| C  | 9.29876700  | 7.23354200  | 7.69241200  |

|                                                                  |             |             |             |
|------------------------------------------------------------------|-------------|-------------|-------------|
| H                                                                | 8.84080300  | 7.97553300  | 8.35470500  |
| H                                                                | 8.49764200  | 6.65878800  | 7.21753400  |
| H                                                                | 9.89516900  | 6.54387800  | 8.29789800  |
| C                                                                | 11.39369200 | 9.08895200  | 8.54368400  |
| H                                                                | 12.37157700 | 9.48077200  | 8.84175400  |
| H                                                                | 10.67432000 | 9.91492200  | 8.57302600  |
| H                                                                | 11.09474500 | 8.33811700  | 9.27868100  |
| O                                                                | 10.63085700 | 6.85250800  | 5.74356400  |
| O                                                                | 12.33274200 | 7.34581600  | 7.18647700  |
| B                                                                | 11.89096400 | 6.41281600  | 6.21593000  |
| <b>CO<sub>2</sub></b>                                            |             |             |             |
| $G_{\text{solv}} = -188.533929; E_{\text{solv}} = -188.52494603$ |             |             |             |
| C                                                                | -0.09485100 | 0.31165300  | 0.00000000  |
| O                                                                | 1.07004300  | 0.31165300  | 0.00000000  |
| O                                                                | -1.25974500 | 0.31165300  | 0.00000000  |
| <b>HBpin</b>                                                     |             |             |             |
| $G_{\text{solv}} = -411.620745; E_{\text{solv}} = -411.78003159$ |             |             |             |
| C                                                                | -0.54961800 | 0.72578900  | -0.07263700 |
| C                                                                | -1.03444400 | 2.22004500  | -0.09845400 |
| H                                                                | 2.36067000  | 2.49325800  | -0.23609000 |
| C                                                                | -1.25527200 | -0.19040300 | -1.06042900 |
| H                                                                | -0.84995300 | -1.20298900 | -0.97761300 |
| H                                                                | -2.32744400 | -0.23555800 | -0.84225300 |
| H                                                                | -1.12240300 | 0.14399000  | -2.09125800 |
| C                                                                | -1.53316200 | 2.67101100  | -1.47137300 |
| H                                                                | -2.49285700 | 2.20783100  | -1.71917100 |
| H                                                                | -1.66915300 | 3.75610100  | -1.46067700 |
| H                                                                | -0.81545800 | 2.42859300  | -2.26098800 |
| C                                                                | -0.56795400 | 0.10659700  | 1.32494800  |
| H                                                                | -1.59084500 | -0.07308600 | 1.66884900  |
| H                                                                | -0.04288100 | -0.85226800 | 1.29466600  |
| H                                                                | -0.06195800 | 0.74530200  | 2.05536200  |
| C                                                                | -2.05362700 | 2.57905700  | 0.97204800  |
| H                                                                | -2.32530900 | 3.63493100  | 0.88241500  |
| H                                                                | -2.96429800 | 1.98351700  | 0.84919800  |
| H                                                                | -1.66147800 | 2.41590100  | 1.97792500  |
| O                                                                | 0.84550500  | 0.84580600  | -0.45694600 |
| O                                                                | 0.19440600  | 2.94906100  | 0.15931400  |
| B                                                                | 1.23026300  | 2.12729800  | -0.18260600 |
| <b>pinBOCHO</b>                                                  |             |             |             |
| $G_{\text{solv}} = -600.170716; E_{\text{solv}} = -600.34076123$ |             |             |             |
| C                                                                | -0.53975000 | 0.61542900  | -0.13281500 |
| C                                                                | -0.83273800 | 2.16185400  | -0.11463400 |
| C                                                                | -1.43792400 | -0.18712100 | -1.05960600 |
| H                                                                | -1.16695800 | -1.24549100 | -1.01078400 |
| H                                                                | -2.48452500 | -0.09097100 | -0.75278100 |
| H                                                                | -1.34548000 | 0.13858200  | -2.09749600 |
| C                                                                | -1.35171800 | 2.69483400  | -1.44833800 |
| H                                                                | -2.37674100 | 2.36306600  | -1.63590000 |
| H                                                                | -1.34588800 | 3.78812500  | -1.42104700 |
| H                                                                | -0.72448400 | 2.37258400  | -2.28529400 |
| C                                                                | -0.51739800 | -0.01095200 | 1.26012600  |
| H                                                                | -1.52329800 | -0.06695800 | 1.68588900  |
| H                                                                | -0.11977200 | -1.02678500 | 1.18615500  |
| H                                                                | 0.12060900  | 0.55240700  | 1.94807300  |
| C                                                                | -1.72205100 | 2.62845800  | 1.02530200  |
| H                                                                | -1.86429800 | 3.71115600  | 0.96374100  |
| H                                                                | -2.70625800 | 2.15393000  | 0.95735400  |

|                                                                      |             |             |             |
|----------------------------------------------------------------------|-------------|-------------|-------------|
| H                                                                    | −1.28848300 | 2.39754300  | 2.00022100  |
| O                                                                    | 0.82214400  | 0.56250300  | −0.64050400 |
| O                                                                    | 0.49851300  | 2.72317300  | 0.07098800  |
| B                                                                    | 1.37264100  | 1.77543900  | −0.37648400 |
| O                                                                    | 2.72815000  | 1.99739200  | −0.55937600 |
| C                                                                    | 3.25720900  | 3.23254200  | −0.44791500 |
| H                                                                    | 2.52133700  | 4.02556200  | −0.24937200 |
| O                                                                    | 4.43556000  | 3.42779700  | −0.56358700 |
| (pinBO) <sub>2</sub> CH <sub>2</sub>                                 |             |             |             |
| G <sub>solv</sub> = −1011.826229; E <sub>solv</sub> = −1012.18183779 |             |             |             |
| H                                                                    | −3.90642900 | 1.79489600  | 0.41510900  |
| C                                                                    | −0.53443200 | 3.66308200  | −2.00491900 |
| C                                                                    | −0.81617300 | 3.81626500  | −0.46572100 |
| C                                                                    | 0.92265500  | 3.41388000  | −2.36180700 |
| H                                                                    | 1.02546400  | 3.32269800  | −3.44707600 |
| H                                                                    | 1.54855400  | 4.24925400  | −2.03057100 |
| H                                                                    | 1.29656900  | 2.49338100  | −1.90866800 |
| C                                                                    | 0.11127600  | 2.96196200  | 0.39720800  |
| H                                                                    | 1.13043200  | 3.36039300  | 0.40880700  |
| H                                                                    | −0.26882800 | 2.95271900  | 1.42273500  |
| H                                                                    | 0.13805700  | 1.92962500  | 0.03987800  |
| C                                                                    | −1.09088500 | 4.82123000  | −2.83328000 |
| H                                                                    | −0.51477500 | 5.73835900  | −2.67768200 |
| H                                                                    | −1.03667400 | 4.55751800  | −3.89326200 |
| H                                                                    | −2.13854400 | 5.02358300  | −2.58932500 |
| C                                                                    | −0.84243100 | 5.24968600  | 0.03930700  |
| H                                                                    | −1.04423600 | 5.25819100  | 1.11458900  |
| H                                                                    | 0.12566700  | 5.73366800  | −0.12735200 |
| H                                                                    | −1.61776400 | 5.83838800  | −0.45522100 |
| O                                                                    | −1.30502600 | 2.48665400  | −2.34274100 |
| O                                                                    | −2.14327600 | 3.25189400  | −0.34393400 |
| B                                                                    | −2.29023500 | 2.37931100  | −1.39548300 |
| O                                                                    | −3.32645900 | 1.50945000  | −1.54498600 |
| C                                                                    | −4.18829100 | 1.22139800  | −0.47502200 |
| H                                                                    | −5.20838300 | 1.46590700  | −0.77841200 |
| O                                                                    | −4.17495400 | −0.15417600 | −0.20547700 |
| C                                                                    | −1.66834300 | −2.38482600 | 0.97506800  |
| C                                                                    | −1.11151200 | −0.99094500 | 1.44008500  |
| C                                                                    | −1.66091300 | −3.46005100 | 2.05013400  |
| H                                                                    | −2.05539900 | −4.39424600 | 1.63985600  |
| H                                                                    | −0.63979200 | −3.64729200 | 2.39891800  |
| H                                                                    | −2.27830000 | −3.18032500 | 2.90630500  |
| C                                                                    | −1.39957900 | −0.68571200 | 2.90987300  |
| H                                                                    | −0.78083600 | −1.29715100 | 3.57339700  |
| H                                                                    | −1.17340600 | 0.36688300  | 3.10328300  |
| H                                                                    | −2.45119200 | −0.85791000 | 3.15932200  |
| C                                                                    | −0.99538300 | −2.90146900 | −0.29728000 |
| H                                                                    | 0.03300400  | −3.22147600 | −0.10497400 |
| H                                                                    | −1.55840000 | −3.76143300 | −0.67060600 |
| H                                                                    | −0.98184900 | −2.13956600 | −1.08290600 |
| C                                                                    | 0.36261500  | −0.77187900 | 1.13819600  |
| H                                                                    | 0.68873100  | 0.19161500  | 1.53972700  |
| H                                                                    | 0.96610300  | −1.55340300 | 1.61219700  |
| H                                                                    | 0.56070100  | −0.78202600 | 0.06432500  |
| O                                                                    | −3.03819000 | −2.07061100 | 0.63412500  |
| O                                                                    | −1.90644300 | −0.06886700 | 0.65332200  |
| B                                                                    | −3.06731700 | −0.73366900 | 0.33561500  |
| HCHO                                                                 |             |             |             |

| $G_{\text{solv}} = -114.465363; E_{\text{solv}} = -114.47076963$   |             |             |             |
|--------------------------------------------------------------------|-------------|-------------|-------------|
| C                                                                  | -0.28089900 | 0.90851400  | 0.00000000  |
| H                                                                  | 0.24416300  | -0.06478600 | 0.00000000  |
| H                                                                  | -1.38647400 | 0.87640700  | 0.00000000  |
| O                                                                  | 0.32293800  | 1.95511600  | 0.00000000  |
| <b>pinBOBpin</b>                                                   |             |             |             |
| $G_{\text{solv}} = -897.360742; E_{\text{solv}} = -897.68427029$   |             |             |             |
| C                                                                  | -0.95732600 | 1.21594800  | 0.16352800  |
| C                                                                  | -2.21104900 | 0.36017500  | -0.24930500 |
| C                                                                  | 3.63870400  | -3.32754000 | 0.54295800  |
| C                                                                  | 3.87897200  | -1.84715600 | 0.06823400  |
| C                                                                  | -1.21000500 | 2.21278800  | 1.28376200  |
| H                                                                  | -0.29023200 | 2.76251300  | 1.50429600  |
| H                                                                  | -1.97455500 | 2.93808800  | 0.98606000  |
| H                                                                  | -1.53586600 | 1.71694100  | 2.20035100  |
| C                                                                  | -3.16063200 | 0.08334700  | 0.91683400  |
| H                                                                  | -3.70262600 | 0.98578700  | 1.21478300  |
| H                                                                  | -3.89113800 | -0.66937400 | 0.60737400  |
| H                                                                  | -2.62605000 | -0.30444400 | 1.78967800  |
| C                                                                  | -0.28594700 | 1.90979400  | -1.02180100 |
| H                                                                  | -0.89608800 | 2.73511200  | -1.40081100 |
| H                                                                  | 0.67687300  | 2.31365500  | -0.69649100 |
| H                                                                  | -0.09629900 | 1.21072700  | -1.84215000 |
| C                                                                  | -2.98516300 | 0.90366100  | -1.44008400 |
| H                                                                  | -3.83572200 | 0.25068700  | -1.65678900 |
| H                                                                  | -3.37277200 | 1.90419300  | -1.22126400 |
| H                                                                  | -2.36386000 | 0.95733200  | -2.33644400 |
| C                                                                  | 4.43509800  | -3.73699100 | 1.77195500  |
| H                                                                  | 4.20260200  | -4.77352500 | 2.03296700  |
| H                                                                  | 5.50986800  | -3.67018700 | 1.57284400  |
| H                                                                  | 4.19900900  | -3.11004300 | 2.63411100  |
| C                                                                  | 3.82553100  | -4.35461900 | -0.57389600 |
| H                                                                  | 4.88006600  | -4.46355600 | -0.84441100 |
| H                                                                  | 3.45818100  | -5.32505100 | -0.22819900 |
| H                                                                  | 3.26233500  | -4.08123100 | -1.47165800 |
| C                                                                  | 4.18876400  | -0.88872600 | 1.21835100  |
| H                                                                  | 5.18672100  | -1.06635800 | 1.63013000  |
| H                                                                  | 4.14792100  | 0.13802800  | 0.84390700  |
| H                                                                  | 3.45617700  | -0.97913600 | 2.02638900  |
| C                                                                  | 4.91095400  | -1.69393700 | -1.03780500 |
| H                                                                  | 5.01349300  | -0.63778700 | -1.30383600 |
| H                                                                  | 5.88879100  | -2.05560600 | -0.70267800 |
| H                                                                  | 4.62418800  | -2.24310000 | -1.93689000 |
| O                                                                  | -0.03789200 | 0.20203900  | 0.63389500  |
| O                                                                  | -1.61254000 | -0.90495800 | -0.61703900 |
| O                                                                  | 2.57837600  | -1.47818600 | -0.44804100 |
| O                                                                  | 2.23117100  | -3.31817000 | 0.87941800  |
| O                                                                  | 0.31517200  | -2.12525900 | 0.09285600  |
| B                                                                  | -0.40649200 | -0.97306500 | 0.02844100  |
| B                                                                  | 1.66449700  | -2.28580900 | 0.18029500  |
| <b>Fe-1cyp</b>                                                     |             |             |             |
| $G_{\text{solv}} = -3124.537937; E_{\text{solv}} = -3125.32568092$ |             |             |             |
| C                                                                  | 11.12639600 | 4.86396600  | 8.06568500  |
| H                                                                  | 11.16434000 | 5.29703500  | 9.07285600  |
| C                                                                  | 11.04227500 | 3.31124600  | 8.19838000  |
| H                                                                  | 11.83533400 | 2.79604000  | 7.64941800  |
| H                                                                  | 11.14882300 | 3.02478900  | 9.24985500  |
| C                                                                  | 9.65078200  | 2.91317000  | 7.66840500  |

|   |             |             |             |
|---|-------------|-------------|-------------|
| H | 9.71897200  | 2.65256700  | 6.60399900  |
| H | 9.23268700  | 2.04791000  | 8.19284300  |
| C | 8.80945700  | 4.18272500  | 7.82016900  |
| H | 8.51421400  | 4.31967200  | 8.86895000  |
| H | 7.89768500  | 4.17273000  | 7.21403300  |
| C | 9.79379600  | 5.27751400  | 7.40195600  |
| H | 9.47826600  | 6.28623500  | 7.68898400  |
| H | 9.89539600  | 5.25853600  | 6.30868400  |
| C | 13.98109400 | 5.21767500  | 8.36859000  |
| H | 13.67319400 | 5.74401600  | 9.28115900  |
| C | 14.27461000 | 3.74874000  | 8.74113900  |
| H | 13.61338100 | 3.37802600  | 9.53066500  |
| H | 14.14974900 | 3.10536500  | 7.86191200  |
| C | 15.75188400 | 3.75965100  | 9.14462900  |
| H | 15.86794100 | 4.19925000  | 10.14447300 |
| H | 16.19484700 | 2.75815700  | 9.16651600  |
| C | 16.37738600 | 4.67199800  | 8.08642400  |
| H | 16.48885600 | 4.10912500  | 7.15140000  |
| H | 17.36597600 | 5.05012300  | 8.36684500  |
| C | 15.34383600 | 5.79758900  | 7.88223600  |
| H | 15.30586200 | 6.09887100  | 6.83103700  |
| H | 15.60525700 | 6.68305700  | 8.47275000  |
| C | 12.47652400 | 7.31012400  | 7.16339600  |
| H | 13.49529500 | 7.63246400  | 6.91236600  |
| C | 12.09369800 | 7.99229000  | 8.49058400  |
| H | 11.23353700 | 7.49604500  | 8.95813100  |
| H | 12.91287500 | 7.98988400  | 9.21708500  |
| C | 11.68431000 | 9.40079400  | 8.05048800  |
| H | 11.13696800 | 9.95222900  | 8.82216300  |
| H | 12.58010500 | 9.98273100  | 7.79713400  |
| C | 10.84844800 | 9.13937100  | 6.79118700  |
| H | 10.77904600 | 10.01443100 | 6.13754500  |
| H | 9.82492000  | 8.87553700  | 7.08582500  |
| C | 11.52474100 | 7.93230000  | 6.09949200  |
| H | 12.10313800 | 8.23991500  | 5.22230300  |
| H | 10.77578900 | 7.22235300  | 5.74085700  |
| C | 13.26205600 | 4.76768500  | 1.66236000  |
| H | 13.76215800 | 4.29408000  | 0.80804300  |
| C | 13.55133800 | 6.28455100  | 1.61199100  |
| H | 14.54640900 | 6.50454500  | 1.21406200  |
| H | 13.49471800 | 6.71859200  | 2.61829800  |
| C | 12.41795900 | 6.85041000  | 0.75149700  |
| H | 12.30902000 | 7.93577800  | 0.84844300  |
| H | 12.59999600 | 6.62569100  | −0.30792200 |
| C | 11.19701200 | 6.07486600  | 1.25287900  |
| H | 10.86407700 | 6.50505100  | 2.20659400  |
| H | 10.34742000 | 6.10961600  | 0.56348000  |
| C | 11.71849900 | 4.64134700  | 1.48053300  |
| H | 11.49457300 | 4.00359900  | 0.61843200  |
| H | 11.23292200 | 4.18426400  | 2.35005000  |
| C | 13.47169300 | 2.15030900  | 2.77531500  |
| H | 12.39335900 | 2.18008600  | 2.57137400  |
| C | 13.69786900 | 1.12702500  | 3.93087600  |
| H | 14.33387500 | 1.52588300  | 4.72482100  |
| H | 12.73881200 | 0.88121400  | 4.39932200  |
| C | 14.32456300 | −0.12153500 | 3.27267000  |
| H | 15.41294300 | −0.11250100 | 3.41190700  |
| H | 13.95187100 | −1.05588300 | 3.70415600  |

|                                                                       |             |             |             |
|-----------------------------------------------------------------------|-------------|-------------|-------------|
| C                                                                     | 14.00518500 | 0.01841400  | 1.77980100  |
| H                                                                     | 12.96989600 | −0.29055600 | 1.58297400  |
| H                                                                     | 14.65933500 | −0.58425600 | 1.14097800  |
| C                                                                     | 14.15134300 | 1.52420900  | 1.54018200  |
| H                                                                     | 13.69996900 | 1.85784200  | 0.59995300  |
| H                                                                     | 15.21799900 | 1.77765200  | 1.50265700  |
| C                                                                     | 15.70814100 | 4.03001600  | 3.00987300  |
| H                                                                     | 15.92646400 | 3.75185300  | 1.97127100  |
| C                                                                     | 16.30877700 | 5.44510100  | 3.26865900  |
| H                                                                     | 16.67800600 | 5.86536700  | 2.32660800  |
| H                                                                     | 15.57053400 | 6.14158200  | 3.67252200  |
| C                                                                     | 17.46810800 | 5.23769500  | 4.26296700  |
| H                                                                     | 18.30110900 | 5.92619400  | 4.08666400  |
| H                                                                     | 17.10816500 | 5.40697400  | 5.28468500  |
| C                                                                     | 17.85560600 | 3.76536400  | 4.10363900  |
| H                                                                     | 18.42729500 | 3.37588100  | 4.95280300  |
| H                                                                     | 18.46305900 | 3.62630900  | 3.19903500  |
| C                                                                     | 16.49604500 | 3.08129200  | 3.93898400  |
| H                                                                     | 16.00572500 | 3.02585500  | 4.91779000  |
| H                                                                     | 16.56381300 | 2.06462800  | 3.53702500  |
| P                                                                     | 12.62037100 | 5.45515800  | 7.12764000  |
| P                                                                     | 13.86276600 | 3.92046700  | 3.20499100  |
| Fe                                                                    | 12.99618100 | 4.62321500  | 5.11156400  |
| H                                                                     | 14.22034200 | 3.96929800  | 5.71988900  |
| H                                                                     | 13.94266900 | 5.80504700  | 5.00713800  |
| H                                                                     | 12.26130700 | 5.81722800  | 4.38163400  |
| H                                                                     | 11.63694100 | 5.23102800  | 4.49813300  |
| H                                                                     | 11.90815600 | 3.43518500  | 5.13269200  |
| H                                                                     | 12.59702300 | 3.16692500  | 5.58310800  |
| <b>1<sub>Fe</sub></b>                                                 |             |             |             |
| $G_{\text{solv}} = -3123.343910$ ; $E_{\text{solv}} = -3124.11177177$ |             |             |             |
| C                                                                     | 11.23524400 | 4.79942500  | 8.11456000  |
| H                                                                     | 11.20379200 | 5.26678100  | 9.10734900  |
| C                                                                     | 11.25051200 | 3.24939100  | 8.29181000  |
| H                                                                     | 12.04369200 | 2.77455500  | 7.70624000  |
| H                                                                     | 11.43426900 | 2.99531200  | 9.34054600  |
| C                                                                     | 9.85991100  | 2.75192400  | 7.83884200  |
| H                                                                     | 9.91393900  | 2.38929400  | 6.80440800  |
| H                                                                     | 9.48833900  | 1.92663400  | 8.45427400  |
| C                                                                     | 8.96464500  | 3.99347600  | 7.88979300  |
| H                                                                     | 8.65533300  | 4.19863600  | 8.92321700  |
| H                                                                     | 8.05843200  | 3.89677400  | 7.28266300  |
| C                                                                     | 9.90238900  | 5.09738500  | 7.39592000  |
| H                                                                     | 9.53313300  | 6.10873300  | 7.59455000  |
| H                                                                     | 10.02687000 | 4.99670200  | 6.30923400  |
| C                                                                     | 14.04210500 | 5.37226400  | 8.51043600  |
| H                                                                     | 13.63898100 | 5.90318200  | 9.38252400  |
| C                                                                     | 14.42496400 | 3.93500600  | 8.93959800  |
| H                                                                     | 13.79863800 | 3.56516500  | 9.75750600  |
| H                                                                     | 14.31521200 | 3.24843700  | 8.09241000  |
| C                                                                     | 15.90879100 | 4.03082500  | 9.30854600  |
| H                                                                     | 16.02813100 | 4.49363700  | 10.29772000 |
| H                                                                     | 16.40216800 | 3.05331800  | 9.33431200  |
| C                                                                     | 16.45665700 | 4.95742500  | 8.22183000  |
| H                                                                     | 16.53174300 | 4.40012600  | 7.27979000  |
| H                                                                     | 17.44582600 | 5.36708300  | 8.45176200  |
| C                                                                     | 15.38030600 | 6.04656400  | 8.08044200  |
| H                                                                     | 15.34748300 | 6.43043200  | 7.05693500  |

|   |             |             |             |
|---|-------------|-------------|-------------|
| H | 15.59595700 | 6.89088100  | 8.74591100  |
| C | 12.44234400 | 7.28019400  | 7.08682900  |
| H | 13.45199300 | 7.67293800  | 6.91734600  |
| C | 11.84934000 | 8.03263000  | 8.29325800  |
| H | 11.02512900 | 7.47114100  | 8.74997200  |
| H | 12.59440600 | 8.21723600  | 9.07419600  |
| C | 11.29855500 | 9.31887400  | 7.66787200  |
| H | 10.60161200 | 9.85166700  | 8.32331800  |
| H | 12.12604700 | 10.00185200 | 7.43538500  |
| C | 10.64311100 | 8.82405200  | 6.37185100  |
| H | 10.50330500 | 9.62005100  | 5.63384900  |
| H | 9.65022100  | 8.41681500  | 6.60031300  |
| C | 11.57205800 | 7.69877100  | 5.86315200  |
| H | 12.22011600 | 8.05503100  | 5.05513700  |
| H | 10.99171200 | 6.86453200  | 5.45394500  |
| C | 13.32783300 | 4.92912400  | 1.80005800  |
| H | 13.79395600 | 4.53598900  | 0.88694800  |
| C | 13.64579800 | 6.43545000  | 1.89538400  |
| H | 14.66349600 | 6.67121200  | 1.57226400  |
| H | 13.54331800 | 6.78138000  | 2.93335600  |
| C | 12.57182300 | 7.08788700  | 1.02182600  |
| H | 12.48040000 | 8.16633700  | 1.18830600  |
| H | 12.81270000 | 6.93402400  | −0.03839200 |
| C | 11.30324000 | 6.31397400  | 1.39592500  |
| H | 10.88200200 | 6.73320000  | 2.31797900  |
| H | 10.52449300 | 6.37277800  | 0.62906900  |
| C | 11.77810300 | 4.86334200  | 1.64834300  |
| H | 11.50553100 | 4.20115300  | 0.81990800  |
| H | 11.29914200 | 4.45733000  | 2.54758800  |
| C | 13.36912400 | 2.22513500  | 2.73001300  |
| H | 12.28919800 | 2.35368700  | 2.58226300  |
| C | 13.56123000 | 1.11751600  | 3.81051500  |
| H | 14.26959000 | 1.41021800  | 4.58838300  |
| H | 12.61020500 | 0.93035700  | 4.32062600  |
| C | 14.03931100 | −0.13682200 | 3.04637300  |
| H | 15.12914800 | −0.23310700 | 3.13124200  |
| H | 13.60250000 | −1.06081400 | 3.43823400  |
| C | 13.67027600 | 0.12684400  | 1.58171400  |
| H | 12.60445800 | −0.07937600 | 1.41599700  |
| H | 14.24114500 | −0.48670900 | 0.87673800  |
| C | 13.93915700 | 1.62683600  | 1.42846700  |
| H | 13.48184800 | 2.06073700  | 0.53274700  |
| H | 15.02186800 | 1.78892700  | 1.35866500  |
| C | 15.76714700 | 3.89420900  | 2.99777400  |
| H | 15.94509700 | 3.58483300  | 1.96070800  |
| C | 16.47521700 | 5.26389100  | 3.22340600  |
| H | 16.83852400 | 5.65270700  | 2.26544400  |
| H | 15.80233600 | 6.01039300  | 3.65115700  |
| C | 17.64845200 | 4.98097900  | 4.18298100  |
| H | 18.52882000 | 5.59404600  | 3.96316200  |
| H | 17.33666800 | 5.20177500  | 5.21075000  |
| C | 17.90938100 | 3.47820400  | 4.04833300  |
| H | 18.46935600 | 3.06186300  | 4.89251700  |
| H | 18.47881600 | 3.26933900  | 3.13227400  |
| C | 16.49484200 | 2.90471100  | 3.93393800  |
| H | 16.02266000 | 2.91395100  | 4.92358100  |
| H | 16.47003100 | 1.87685700  | 3.55502500  |
| P | 12.72277400 | 5.44707300  | 7.20687100  |

|                                                                    |             |             |             |
|--------------------------------------------------------------------|-------------|-------------|-------------|
| P                                                                  | 13.92819900 | 3.92448000  | 3.24529600  |
| Fe                                                                 | 13.17095800 | 4.60317600  | 5.21463100  |
| H                                                                  | 13.97658300 | 3.50151100  | 5.84837200  |
| H                                                                  | 14.38340800 | 5.56230700  | 5.26845900  |
| H                                                                  | 11.77358100 | 3.79672500  | 5.00622100  |
| H                                                                  | 12.30934600 | 3.30212800  | 5.46536900  |
| <b>2<sub>Fe</sub></b>                                              |             |             |             |
| $G_{\text{solv}} = -3311.886840; E_{\text{solv}} = -3312.66848983$ |             |             |             |
| C                                                                  | -2.02317600 | -0.11436200 | 2.85332900  |
| H                                                                  | -1.92432300 | 0.14838700  | 3.91328400  |
| C                                                                  | -1.98393700 | -1.67023000 | 2.72506600  |
| H                                                                  | -1.23421000 | -2.01171900 | 2.00565300  |
| H                                                                  | -1.72300700 | -2.11316900 | 3.69127100  |
| C                                                                  | -3.40424900 | -2.09580400 | 2.29917000  |
| H                                                                  | -3.45223700 | -2.20617900 | 1.20756500  |
| H                                                                  | -3.70248800 | -3.05409700 | 2.73553500  |
| C                                                                  | -4.29963100 | -0.92952800 | 2.72540100  |
| H                                                                  | -4.48779300 | -0.96972800 | 3.80633500  |
| H                                                                  | -5.26904400 | -0.92081800 | 2.21696800  |
| C                                                                  | -3.43834500 | 0.28957100  | 2.38688000  |
| H                                                                  | -3.78195200 | 1.21522900  | 2.85828000  |
| H                                                                  | -3.46008200 | 0.44809200  | 1.30040600  |
| C                                                                  | 0.79262800  | 0.45848000  | 3.08188800  |
| H                                                                  | 0.48219100  | 0.86634900  | 4.05191700  |
| C                                                                  | 1.20142500  | -1.01157900 | 3.31046800  |
| H                                                                  | 0.58294300  | -1.50162300 | 4.06881000  |
| H                                                                  | 1.11140800  | -1.58504000 | 2.38089900  |
| C                                                                  | 2.67882800  | -0.91638400 | 3.70207000  |
| H                                                                  | 2.77428600  | -0.55748700 | 4.73556800  |
| H                                                                  | 3.19965000  | -1.87722300 | 3.63243000  |
| C                                                                  | 3.21324500  | 0.13031500  | 2.72186500  |
| H                                                                  | 3.35375700  | -0.34359400 | 1.74333200  |
| H                                                                  | 4.17480300  | 0.55906000  | 3.02096300  |
| C                                                                  | 2.09374700  | 1.18710000  | 2.62846700  |
| H                                                                  | 2.01821800  | 1.59597200  | 1.61574200  |
| H                                                                  | 2.29683200  | 2.03075400  | 3.29732200  |
| C                                                                  | -0.92444500 | 2.56139900  | 2.24769200  |
| H                                                                  | 0.02376400  | 3.00486100  | 1.92007500  |
| C                                                                  | -1.16818300 | 3.00404800  | 3.70792000  |
| H                                                                  | -1.83075600 | 2.30330600  | 4.23236100  |
| H                                                                  | -0.23915200 | 3.07345800  | 4.28263700  |
| C                                                                  | -1.88168700 | 4.35140700  | 3.56010200  |
| H                                                                  | -2.37420700 | 4.67692800  | 4.48237700  |
| H                                                                  | -1.15748000 | 5.12577800  | 3.27578300  |
| C                                                                  | -2.85807000 | 4.09661300  | 2.40834000  |
| H                                                                  | -3.23091000 | 5.01745600  | 1.94915600  |
| H                                                                  | -3.72974100 | 3.54750200  | 2.78764000  |
| C                                                                  | -2.06611900 | 3.22354700  | 1.41469400  |
| H                                                                  | -1.62475800 | 3.83693100  | 0.62446200  |
| H                                                                  | -2.70639100 | 2.49796300  | 0.90978900  |
| C                                                                  | 0.02308500  | -0.32835400 | -3.67545400 |
| H                                                                  | 0.41127600  | -1.05325100 | -4.40255800 |
| C                                                                  | 0.56231900  | 1.05968800  | -4.07946400 |
| H                                                                  | 1.59014200  | 1.01058400  | -4.45042800 |
| H                                                                  | 0.54575300  | 1.75677900  | -3.23663100 |
| C                                                                  | -0.43815200 | 1.52501500  | -5.14138400 |
| H                                                                  | -0.36836400 | 2.59767300  | -5.34794100 |
| H                                                                  | -0.25865600 | 0.98986600  | -6.08387000 |

|                                                                      |             |             |             |
|----------------------------------------------------------------------|-------------|-------------|-------------|
| C                                                                    | -1.78944900 | 1.11717300  | -4.54532200 |
| H                                                                    | -2.09370500 | 1.86036700  | -3.80086000 |
| H                                                                    | -2.58459300 | 1.04892800  | -5.29469600 |
| C                                                                    | -1.52243500 | -0.23250200 | -3.84197100 |
| H                                                                    | -1.89031000 | -1.07542400 | -4.43745500 |
| H                                                                    | -2.03949900 | -0.26639400 | -2.87696700 |
| C                                                                    | -0.10144700 | -2.71317200 | -2.13803600 |
| H                                                                    | -1.16392800 | -2.58538400 | -2.38948200 |
| C                                                                    | -0.02674400 | -3.56386400 | -0.83541200 |
| H                                                                    | 0.71396700  | -3.17900100 | -0.13175100 |
| H                                                                    | -0.98793700 | -3.53302900 | -0.31238300 |
| C                                                                    | 0.33024000  | -4.99956600 | -1.28748400 |
| H                                                                    | 1.38921800  | -5.20063600 | -1.08317200 |
| H                                                                    | -0.24961600 | -5.76256400 | -0.75915200 |
| C                                                                    | 0.09513000  | -5.01587300 | -2.80290900 |
| H                                                                    | -0.97014400 | -5.16670300 | -3.02183500 |
| H                                                                    | 0.65430800  | -5.80519000 | -3.31560700 |
| C                                                                    | 0.51502800  | -3.60745500 | -3.23171100 |
| H                                                                    | 0.17301200  | -3.34383000 | -4.23753500 |
| H                                                                    | 1.61035100  | -3.54056000 | -3.22382800 |
| C                                                                    | 2.35193200  | -1.08733200 | -2.10735000 |
| H                                                                    | 2.57445900  | -1.59573600 | -3.05364400 |
| C                                                                    | 3.08592300  | 0.28796800  | -2.10293400 |
| H                                                                    | 3.47825900  | 0.49942200  | -3.10264500 |
| H                                                                    | 2.42831500  | 1.11689200  | -1.83333800 |
| C                                                                    | 4.23088600  | 0.15595100  | -1.07762500 |
| H                                                                    | 5.14209200  | 0.66831700  | -1.40166600 |
| H                                                                    | 3.92336600  | 0.60941800  | -0.12845900 |
| C                                                                    | 4.42634400  | -1.35156900 | -0.88971900 |
| H                                                                    | 4.92955800  | -1.60511900 | 0.04952600  |
| H                                                                    | 5.02709800  | -1.76356600 | -1.71147900 |
| C                                                                    | 2.99648900  | -1.89447100 | -0.96025800 |
| H                                                                    | 2.48364400  | -1.68061100 | -0.01504000 |
| H                                                                    | 2.94820500  | -2.97549100 | -1.13217500 |
| P                                                                    | -0.64755600 | 0.74778900  | 1.95048400  |
| P                                                                    | 0.50865300  | -0.95843600 | -2.00186100 |
| Fe                                                                   | -0.30562000 | 0.08398600  | -0.17650400 |
| H                                                                    | 0.32660800  | -1.07153100 | 0.52139700  |
| H                                                                    | 1.10636400  | 0.33987100  | 0.10151900  |
| H                                                                    | -1.55653300 | -0.92115700 | -0.59662300 |
| H                                                                    | -1.78337300 | -0.61146600 | 0.12604200  |
| C                                                                    | 0.09169600  | 1.86653400  | -0.70700800 |
| O                                                                    | -1.06901500 | 1.69649600  | -1.14547700 |
| O                                                                    | 0.91422400  | 2.75907400  | -0.67488600 |
| TS <sub>2,3-Fe</sub>                                                 |             |             |             |
| G <sub>solv</sub> = -3311.886091; E <sub>solv</sub> = -3312.66749341 |             |             |             |
| C                                                                    | 10.95755800 | 5.09970200  | 7.67913000  |
| H                                                                    | 11.06241400 | 5.30567500  | 8.75110200  |
| C                                                                    | 11.02033300 | 3.55401000  | 7.46454200  |
| H                                                                    | 11.78547000 | 3.26422700  | 6.73972900  |
| H                                                                    | 11.27168500 | 3.06182700  | 8.40927000  |
| C                                                                    | 9.61293500  | 3.13442000  | 6.99591200  |
| H                                                                    | 9.57564500  | 3.10423300  | 5.89859300  |
| H                                                                    | 9.32918700  | 2.14147700  | 7.35849900  |
| C                                                                    | 8.69397600  | 4.25060800  | 7.49940500  |
| H                                                                    | 8.50561100  | 4.13100900  | 8.57435800  |
| H                                                                    | 7.72498400  | 4.27611800  | 6.99057100  |
| C                                                                    | 9.53115400  | 5.50739100  | 7.24810500  |

|   |             |             |             |
|---|-------------|-------------|-------------|
| H | 9.17135500  | 6.39022100  | 7.78510500  |
| H | 9.49874800  | 5.74362200  | 6.17635300  |
| C | 13.75679300 | 5.73774700  | 7.94537100  |
| H | 13.44374400 | 6.12448300  | 8.92344100  |
| C | 14.17577000 | 4.26740800  | 8.14591500  |
| H | 13.55085200 | 3.75283800  | 8.88264700  |
| H | 14.10568100 | 3.71721600  | 7.20047800  |
| C | 15.64527900 | 4.36925100  | 8.56422300  |
| H | 15.71893400 | 4.70669500  | 9.60676200  |
| H | 16.17728200 | 3.41534800  | 8.48361900  |
| C | 16.18721100 | 5.44186400  | 7.61599300  |
| H | 16.36487300 | 4.98732800  | 6.63470000  |
| H | 17.13246500 | 5.88103500  | 7.94989600  |
| C | 15.05308800 | 6.48291000  | 7.50797300  |
| H | 14.98290600 | 6.89020300  | 6.49469500  |
| H | 15.23596100 | 7.33137200  | 8.17643500  |
| C | 11.98043800 | 7.82744200  | 7.20145300  |
| H | 12.93345600 | 8.30841200  | 6.94882400  |
| C | 11.64407000 | 8.19608900  | 8.66346000  |
| H | 10.96907600 | 7.45915200  | 9.11685300  |
| H | 12.53650900 | 8.25759900  | 9.29444800  |
| C | 10.90951500 | 9.53436900  | 8.53478800  |
| H | 10.35630600 | 9.80611400  | 9.43997500  |
| H | 11.63136600 | 10.33534000 | 8.32981500  |
| C | 10.00712700 | 9.31553300  | 7.31664000  |
| H | 9.64605000  | 10.25050300 | 6.87695900  |
| H | 9.12447900  | 8.73722700  | 7.61861000  |
| C | 10.87057800 | 8.49836000  | 6.33448500  |
| H | 11.33755400 | 9.14945400  | 5.59041800  |
| H | 10.27339900 | 7.77764600  | 5.77132300  |
| C | 12.92941600 | 4.92223300  | 1.19590900  |
| H | 13.30004000 | 4.17044300  | 0.48696500  |
| C | 13.48226900 | 6.29008900  | 0.74584900  |
| H | 14.51200200 | 6.22237100  | 0.38323900  |
| H | 13.45867500 | 7.01342600  | 1.56643100  |
| C | 12.49056500 | 6.72434000  | −0.33711800 |
| H | 12.57255700 | 7.78720600  | −0.58572900 |
| H | 12.66701200 | 6.15044900  | −1.25716300 |
| C | 11.13285500 | 6.35543100  | 0.27044800  |
| H | 10.82960800 | 7.13686700  | 0.97514300  |
| H | 10.34134200 | 6.25803600  | −0.47942700 |
| C | 11.38473800 | 5.03796400  | 1.03915400  |
| H | 10.99366800 | 4.17214800  | 0.49349400  |
| H | 10.87926100 | 5.06271200  | 2.01085800  |
| C | 12.76531600 | 2.59740300  | 2.81649700  |
| H | 11.70702500 | 2.73962600  | 2.55373000  |
| C | 12.81113800 | 1.79277800  | 4.14621100  |
| H | 13.61063800 | 2.13827300  | 4.80476200  |
| H | 11.87849800 | 1.92929600  | 4.70257500  |
| C | 13.03064400 | 0.31435300  | 3.73889400  |
| H | 14.05287400 | 0.00723000  | 3.99000200  |
| H | 12.35407500 | −0.36844400 | 4.26186000  |
| C | 12.84539200 | 0.27617000  | 2.21507000  |
| H | 11.78090300 | 0.18483300  | 1.96241300  |
| H | 13.37081200 | −0.55895600 | 1.74067500  |
| C | 13.36267900 | 1.64486800  | 1.76438700  |
| H | 13.06837200 | 1.90001700  | 0.74136500  |
| H | 14.45941400 | 1.65049000  | 1.80837200  |

|                                                                    |             |             |            |
|--------------------------------------------------------------------|-------------|-------------|------------|
| C                                                                  | 15.25561000 | 4.17109800  | 2.76919600 |
| H                                                                  | 15.45742200 | 3.61058000  | 1.84843300 |
| C                                                                  | 16.01269900 | 5.53350300  | 2.69224400 |
| H                                                                  | 16.46470800 | 5.64438900  | 1.70115700 |
| H                                                                  | 15.36070700 | 6.39682200  | 2.84234500 |
| C                                                                  | 17.09789400 | 5.47642700  | 3.78292300 |
| H                                                                  | 18.01036300 | 6.00664800  | 3.49302800 |
| H                                                                  | 16.72011900 | 5.94966700  | 4.69698800 |
| C                                                                  | 17.31804600 | 3.98233300  | 4.03136000 |
| H                                                                  | 17.80710900 | 3.77164200  | 4.98848500 |
| H                                                                  | 17.94166300 | 3.55234500  | 3.23618900 |
| C                                                                  | 15.89730900 | 3.41646000  | 3.95534500 |
| H                                                                  | 15.36666000 | 3.65865000  | 4.88361500 |
| H                                                                  | 15.86669100 | 2.32947400  | 3.82293800 |
| P                                                                  | 12.31323400 | 6.03850000  | 6.82107600 |
| P                                                                  | 13.41582400 | 4.34051900  | 2.88776300 |
| Fe                                                                 | 12.64709700 | 5.46480900  | 4.67533700 |
| H                                                                  | 13.27405300 | 4.30355100  | 5.38326700 |
| H                                                                  | 14.05362600 | 5.92922800  | 4.75482700 |
| H                                                                  | 11.36020900 | 4.51668500  | 4.26614300 |
| H                                                                  | 11.13212900 | 4.87212100  | 4.96963700 |
| C                                                                  | 13.16425000 | 7.29123400  | 4.25739300 |
| O                                                                  | 12.07173400 | 7.14862500  | 3.67122600 |
| O                                                                  | 13.96521900 | 8.18162800  | 4.45325400 |
| <b>3<sub>Fe</sub></b>                                              |             |             |            |
| $G_{\text{solv}} = -3311.893623; E_{\text{solv}} = -3312.67854045$ |             |             |            |
| C                                                                  | -1.56458100 | -0.48461900 | 3.01505200 |
| H                                                                  | -1.84435700 | 0.00619000  | 3.95458200 |
| C                                                                  | -0.79202800 | -1.79690800 | 3.36307500 |
| H                                                                  | 0.20243000  | -1.84256800 | 2.91098600 |
| H                                                                  | -0.64676700 | -1.85912700 | 4.44675600 |
| C                                                                  | -1.68448000 | -2.95242900 | 2.87219700 |
| H                                                                  | -1.40237700 | -3.23382500 | 1.84920400 |
| H                                                                  | -1.59232900 | -3.84718000 | 3.49572400 |
| C                                                                  | -3.09580800 | -2.36031800 | 2.85886100 |
| H                                                                  | -3.49502400 | -2.30978900 | 3.88049500 |
| H                                                                  | -3.80029500 | -2.93884600 | 2.25240600 |
| C                                                                  | -2.85796000 | -0.95094900 | 2.30966900 |
| H                                                                  | -3.69327200 | -0.26502400 | 2.48448400 |
| H                                                                  | -2.69909900 | -1.01373700 | 1.22718400 |
| C                                                                  | 0.61125200  | 1.36469900  | 3.36970500 |
| H                                                                  | 0.01860600  | 1.52013300  | 4.28080600 |
| C                                                                  | 1.75767200  | 0.38800600  | 3.70634000 |
| H                                                                  | 1.44884000  | -0.40215200 | 4.39707100 |
| H                                                                  | 2.12779900  | -0.09507200 | 2.79098500 |
| C                                                                  | 2.84849200  | 1.29485600  | 4.28216400 |
| H                                                                  | 2.58292100  | 1.58859300  | 5.30648500 |
| H                                                                  | 3.82959400  | 0.81021200  | 4.31888700 |
| C                                                                  | 2.81284200  | 2.51016000  | 3.35106900 |
| H                                                                  | 3.37261400  | 2.28904700  | 2.43519900 |
| H                                                                  | 3.25766000  | 3.40500200  | 3.79700600 |
| C                                                                  | 1.32012100  | 2.70500500  | 3.00550400 |
| H                                                                  | 1.20801300  | 2.97491900  | 1.95196900 |
| H                                                                  | 0.87751400  | 3.52373400  | 3.58266000 |
| C                                                                  | -1.65827300 | 2.22060300  | 1.83216700 |
| H                                                                  | -0.96035200 | 3.00241400  | 1.51190700 |
| C                                                                  | -2.40657800 | 2.74694100  | 3.07161400 |
| H                                                                  | -2.88524900 | 1.92900400  | 3.62600200 |

|    |             |             |             |
|----|-------------|-------------|-------------|
| H  | -1.74648600 | 3.27750700  | 3.76581700  |
| C  | -3.48903000 | 3.64176800  | 2.46067000  |
| H  | -4.28278600 | 3.90149900  | 3.16879100  |
| H  | -3.03707500 | 4.57771500  | 2.10763900  |
| C  | -3.99089900 | 2.81360700  | 1.27068500  |
| H  | -4.49306300 | 3.42192700  | 0.51217500  |
| H  | -4.72088100 | 2.07543100  | 1.62707300  |
| C  | -2.73817900 | 2.09380200  | 0.71902800  |
| H  | -2.36819200 | 2.56117300  | -0.19784300 |
| H  | -2.96000800 | 1.05594600  | 0.46407800  |
| C  | 0.20587500  | 0.24858700  | -3.42111800 |
| H  | 0.12127800  | -0.38929900 | -4.31028600 |
| C  | 1.30818900  | 1.28734500  | -3.71306100 |
| H  | 2.14272100  | 0.85661000  | -4.27531100 |
| H  | 1.70987400  | 1.71775300  | -2.79210300 |
| C  | 0.55722200  | 2.37546100  | -4.48659300 |
| H  | 1.11763600  | 3.31381100  | -4.54680200 |
| H  | 0.35861900  | 2.03661700  | -5.51268300 |
| C  | -0.75466200 | 2.51012600  | -3.70527400 |
| H  | -0.58178800 | 3.12631000  | -2.81686700 |
| H  | -1.55314700 | 2.97916000  | -4.28938800 |
| C  | -1.10819700 | 1.07073900  | -3.26838400 |
| H  | -1.89397900 | 0.64194200  | -3.90056500 |
| H  | -1.47373100 | 1.05736600  | -2.23682000 |
| C  | -0.84842700 | -2.14983600 | -2.32764000 |
| H  | -1.75060700 | -1.52573400 | -2.37037000 |
| C  | -1.08262100 | -3.21870400 | -1.21985700 |
| H  | -0.20276500 | -3.37223300 | -0.59022500 |
| H  | -1.88833300 | -2.88980200 | -0.55619800 |
| C  | -1.45027700 | -4.52588100 | -1.96153300 |
| H  | -0.59114000 | -5.20802000 | -1.96462600 |
| H  | -2.28057600 | -5.05743500 | -1.48652400 |
| C  | -1.76297100 | -4.09739800 | -3.40068800 |
| H  | -2.79209100 | -3.72183100 | -3.47072300 |
| H  | -1.65746200 | -4.91298000 | -4.12334400 |
| C  | -0.77927200 | -2.94917400 | -3.64325300 |
| H  | -1.03591700 | -2.34499100 | -4.51907200 |
| H  | 0.22536200  | -3.36035200 | -3.80513300 |
| C  | 2.06662100  | -1.76436100 | -2.43779900 |
| H  | 1.99990600  | -2.05190300 | -3.49410800 |
| C  | 3.34186100  | -0.88720800 | -2.23901200 |
| H  | 3.79552300  | -0.67272000 | -3.21182900 |
| H  | 3.13289900  | 0.07915300  | -1.77393900 |
| C  | 4.29937800  | -1.72332200 | -1.36690300 |
| H  | 5.35024200  | -1.55139200 | -1.61847700 |
| H  | 4.16870900  | -1.45820900 | -0.30956800 |
| C  | 3.84900100  | -3.16954000 | -1.58580100 |
| H  | 4.20968200  | -3.85797300 | -0.81461700 |
| H  | 4.20575900  | -3.53627700 | -2.55736100 |
| C  | 2.32413500  | -3.03835800 | -1.60119900 |
| H  | 1.97689400  | -2.89643300 | -0.56902700 |
| H  | 1.80888900  | -3.91616300 | -2.00507300 |
| P  | -0.55856500 | 0.74978200  | 2.06273900  |
| P  | 0.48673500  | -0.89825300 | -1.99610500 |
| Fe | 0.26272700  | -0.00190000 | 0.08991400  |
| H  | 0.74161900  | -1.37591100 | 0.72496000  |
| H  | 1.87257800  | 0.61018200  | 0.32051300  |
| H  | -1.18619900 | -0.28205400 | -0.18575900 |

|                                                                    |             |             |             |
|--------------------------------------------------------------------|-------------|-------------|-------------|
| H                                                                  | −0.10394600 | −1.44338000 | 0.57920200  |
| C                                                                  | 1.68841500  | 1.66635900  | −0.20890000 |
| O                                                                  | 0.49540700  | 1.89981100  | −0.54713200 |
| O                                                                  | 2.71931900  | 2.31606000  | −0.30356900 |
| <b>TS<sub>3,4</sub>-Fe</b>                                         |             |             |             |
| $G_{\text{solv}} = -3311.893108; E_{\text{solv}} = -3312.67441254$ |             |             |             |
| C                                                                  | −1.52010200 | −0.48769700 | 3.06967900  |
| H                                                                  | −1.76699700 | 0.01067400  | 4.01451100  |
| C                                                                  | −0.78014800 | −1.82189500 | 3.40366900  |
| H                                                                  | 0.18620200  | −1.91242300 | 2.89993500  |
| H                                                                  | −0.57898200 | −1.87132700 | 4.47889800  |
| C                                                                  | −1.73643500 | −2.95255500 | 2.97529700  |
| H                                                                  | −1.49458200 | −3.27813800 | 1.95481700  |
| H                                                                  | −1.66471700 | −3.83071100 | 3.62436900  |
| C                                                                  | −3.12253900 | −2.30278700 | 2.97939500  |
| H                                                                  | −3.49572700 | −2.21165300 | 4.00796700  |
| H                                                                  | −3.86382100 | −2.86583300 | 2.40315100  |
| C                                                                  | −2.84046700 | −0.91739700 | 2.39251700  |
| H                                                                  | −3.64592200 | −0.19596000 | 2.56377900  |
| H                                                                  | −2.70177400 | −1.01009800 | 1.30882100  |
| C                                                                  | 0.76398500  | 1.24199200  | 3.34791700  |
| H                                                                  | 0.23703800  | 1.32640600  | 4.30732600  |
| C                                                                  | 1.92123600  | 0.23184900  | 3.51958000  |
| H                                                                  | 1.66044100  | −0.59975900 | 4.18048300  |
| H                                                                  | 2.20046500  | −0.19643500 | 2.54528000  |
| C                                                                  | 3.07730300  | 1.08121300  | 4.05379600  |
| H                                                                  | 2.91445500  | 1.30128000  | 5.11705200  |
| H                                                                  | 4.04868800  | 0.58405500  | 3.96243300  |
| C                                                                  | 2.97589600  | 2.36312100  | 3.22305900  |
| H                                                                  | 3.44011000  | 2.20391700  | 2.24216800  |
| H                                                                  | 3.48337400  | 3.21575500  | 3.68390000  |
| C                                                                  | 1.46184800  | 2.60552900  | 3.04912300  |
| H                                                                  | 1.25110600  | 2.99081100  | 2.04878500  |
| H                                                                  | 1.09962400  | 3.36270500  | 3.75219900  |
| C                                                                  | −1.54844200 | 2.22647400  | 1.91228800  |
| H                                                                  | −0.83761700 | 2.98523000  | 1.56740400  |
| C                                                                  | −2.23139900 | 2.76844000  | 3.18174600  |
| H                                                                  | −2.71599700 | 1.96294100  | 3.74903300  |
| H                                                                  | −1.52775200 | 3.27159700  | 3.85333300  |
| C                                                                  | −3.30672300 | 3.70107300  | 2.61650200  |
| H                                                                  | −4.06408000 | 3.98224600  | 3.35565300  |
| H                                                                  | −2.83864200 | 4.62367300  | 2.25001600  |
| C                                                                  | −3.87988100 | 2.89542000  | 1.44312700  |
| H                                                                  | −4.39277600 | 3.52332400  | 0.70817300  |
| H                                                                  | −4.61712600 | 2.17715800  | 1.82460500  |
| C                                                                  | −2.67200200 | 2.14294600  | 0.83818200  |
| H                                                                  | −2.31928900 | 2.60865700  | −0.08600200 |
| H                                                                  | −2.93479200 | 1.11509300  | 0.58050600  |
| C                                                                  | 0.30118400  | 0.15666200  | −3.44257700 |
| H                                                                  | 0.25619800  | −0.49732900 | −4.32257800 |
| C                                                                  | 1.39555600  | 1.20874900  | −3.71678700 |
| H                                                                  | 2.24912400  | 0.78515600  | −4.25609800 |
| H                                                                  | 1.76613300  | 1.65424600  | −2.79088300 |
| C                                                                  | 0.64980500  | 2.28491500  | −4.51137600 |
| H                                                                  | 1.20129500  | 3.22906900  | −4.55914400 |
| H                                                                  | 0.47601800  | 1.94229000  | −5.54097500 |
| C                                                                  | −0.67709100 | 2.40484000  | −3.75468700 |
| H                                                                  | −0.51955800 | 3.00522700  | −2.85273200 |

|                                                                    |             |             |             |
|--------------------------------------------------------------------|-------------|-------------|-------------|
| H                                                                  | -1.46701600 | 2.87943200  | -4.34606300 |
| C                                                                  | -1.03134900 | 0.95857400  | -3.34626600 |
| H                                                                  | -1.77739700 | 0.52397200  | -4.02156100 |
| H                                                                  | -1.44850000 | 0.93211900  | -2.33487100 |
| C                                                                  | -0.72185500 | -2.26515600 | -2.37536700 |
| H                                                                  | -1.63891100 | -1.67057800 | -2.48437100 |
| C                                                                  | -0.99181200 | -3.32434100 | -1.26878700 |
| H                                                                  | -0.12352300 | -3.48384600 | -0.62496300 |
| H                                                                  | -1.80545200 | -2.98414300 | -0.61986800 |
| C                                                                  | -1.35431300 | -4.63382700 | -2.01260300 |
| H                                                                  | -0.52442000 | -5.34686300 | -1.93889200 |
| H                                                                  | -2.23621400 | -5.12428000 | -1.58947800 |
| C                                                                  | -1.55102300 | -4.22891700 | -3.48004000 |
| H                                                                  | -2.57053500 | -3.85425100 | -3.63817300 |
| H                                                                  | -1.39108800 | -5.05776400 | -4.17701000 |
| C                                                                  | -0.55110100 | -3.08465600 | -3.66826300 |
| H                                                                  | -0.74160100 | -2.49755700 | -4.57205100 |
| H                                                                  | 0.46446100  | -3.49460100 | -3.74381800 |
| C                                                                  | 2.18967100  | -1.76711800 | -2.33357100 |
| H                                                                  | 2.20917000  | -2.05532100 | -3.39152500 |
| C                                                                  | 3.40153700  | -0.82535100 | -2.04455800 |
| H                                                                  | 3.93107300  | -0.60879600 | -2.97750500 |
| H                                                                  | 3.10472300  | 0.14140700  | -1.62819800 |
| C                                                                  | 4.31390400  | -1.59595500 | -1.07105900 |
| H                                                                  | 5.37284800  | -1.36265000 | -1.21724500 |
| H                                                                  | 4.06136900  | -1.33642900 | -0.03379200 |
| C                                                                  | 3.97196700  | -3.06663800 | -1.32015800 |
| H                                                                  | 4.30189200  | -3.73169300 | -0.51550600 |
| H                                                                  | 4.43658600  | -3.41137900 | -2.25324200 |
| C                                                                  | 2.44947400  | -3.02556100 | -1.47307600 |
| H                                                                  | 2.00436400  | -2.90669800 | -0.47575700 |
| H                                                                  | 2.02443800  | -3.93169800 | -1.91686900 |
| P                                                                  | -0.50158900 | 0.71296700  | 2.08829800  |
| P                                                                  | 0.55254600  | -0.96516600 | -1.99248100 |
| Fe                                                                 | 0.21918500  | -0.08040200 | 0.08507500  |
| H                                                                  | 0.53620800  | -1.52448500 | 0.69439300  |
| H                                                                  | 2.24204300  | 1.29833600  | 0.30503500  |
| H                                                                  | -1.22053700 | -0.27859600 | -0.24036600 |
| H                                                                  | -0.30618800 | -1.48100900 | 0.55285200  |
| C                                                                  | 1.68191200  | 2.08343900  | -0.28491500 |
| O                                                                  | 0.47183700  | 1.77917400  | -0.55991100 |
| O                                                                  | 2.29282300  | 3.10497300  | -0.58764800 |
| <b>4<sub>Fe</sub></b>                                              |             |             |             |
| $G_{\text{solv}} = -3311.898398; E_{\text{solv}} = -3312.68174625$ |             |             |             |
| C                                                                  | -1.72151500 | -0.40455900 | 3.07040700  |
| H                                                                  | -1.78171200 | 0.02388000  | 4.07944600  |
| C                                                                  | -1.25576900 | -1.88455700 | 3.19949800  |
| H                                                                  | -0.54240000 | -2.15636000 | 2.41580700  |
| H                                                                  | -0.74588500 | -2.03961100 | 4.15493300  |
| C                                                                  | -2.53714100 | -2.74817000 | 3.08717900  |
| H                                                                  | -2.56815100 | -3.24216300 | 2.10828500  |
| H                                                                  | -2.57724100 | -3.53582400 | 3.84564900  |
| C                                                                  | -3.70501200 | -1.75979000 | 3.19606400  |
| H                                                                  | -3.92860800 | -1.54668000 | 4.24936700  |
| H                                                                  | -4.62387400 | -2.13011000 | 2.73033500  |
| C                                                                  | -3.15794700 | -0.50021000 | 2.52140900  |
| H                                                                  | -3.74914200 | 0.39648300  | 2.73052200  |
| H                                                                  | -3.14769000 | -0.64433900 | 1.43294200  |

|   |             |             |             |
|---|-------------|-------------|-------------|
| C | 0.82386100  | 0.94784800  | 3.27375600  |
| H | 0.36851200  | 1.27314700  | 4.21646800  |
| C | 1.67070000  | −0.34206100 | 3.49839300  |
| H | 1.50951500  | −0.76448000 | 4.49510000  |
| H | 1.40022000  | −1.11094600 | 2.76923700  |
| C | 3.13489400  | 0.06637800  | 3.25933800  |
| H | 3.58847900  | 0.43886700  | 4.18686100  |
| H | 3.74551500  | −0.77066700 | 2.90509900  |
| C | 3.02319300  | 1.20722300  | 2.24736700  |
| H | 2.77180300  | 0.80097500  | 1.25904700  |
| H | 3.93817100  | 1.80119500  | 2.15169900  |
| C | 1.84064300  | 2.01464000  | 2.78434700  |
| H | 1.43577900  | 2.71533200  | 2.05036800  |
| H | 2.16724400  | 2.61482600  | 3.64277000  |
| C | −1.41034300 | 2.34343500  | 2.06101600  |
| H | −0.61124700 | 3.02515900  | 1.75073400  |
| C | −2.00381300 | 2.89046800  | 3.37330800  |
| H | −2.54536800 | 2.11111500  | 3.92466000  |
| H | −1.23546300 | 3.29509100  | 4.04045900  |
| C | −2.99971300 | 3.94848300  | 2.88616700  |
| H | −3.71115900 | 4.25640700  | 3.65959800  |
| H | −2.45588700 | 4.84257400  | 2.55606400  |
| C | −3.67148000 | 3.26855000  | 1.68658200  |
| H | −4.15320600 | 3.98074300  | 1.00980100  |
| H | −4.45154900 | 2.58568200  | 2.04731600  |
| C | −2.54204700 | 2.47264800  | 0.99670600  |
| H | −2.15157600 | 3.00134500  | 0.12338600  |
| H | −2.90001300 | 1.50279600  | 0.63728500  |
| C | 0.23228300  | 0.10326400  | −3.50746300 |
| H | 0.28726800  | −0.56357900 | −4.37588200 |
| C | 1.24717300  | 1.24927000  | −3.72786800 |
| H | 2.11585500  | 0.91835200  | −4.30664300 |
| H | 1.61381600  | 1.63905000  | −2.77535800 |
| C | 0.42837700  | 2.33758400  | −4.42976600 |
| H | 0.90587400  | 3.32106000  | −4.37820300 |
| H | 0.28986000  | 2.08244700  | −5.48934600 |
| C | −0.90967800 | 2.28631400  | −3.68734400 |
| H | −0.79646700 | 2.78256800  | −2.71733300 |
| H | −1.72311000 | 2.78020100  | −4.22878400 |
| C | −1.17053300 | 0.78333200  | −3.47420600 |
| H | −1.80117000 | 0.37557900  | −4.27265300 |
| H | −1.69743500 | 0.60659800  | −2.52786800 |
| C | −0.48260400 | −2.44314900 | −2.45869400 |
| H | −1.48052100 | −2.02345500 | −2.64529200 |
| C | −0.62618300 | −3.52877600 | −1.34645800 |
| H | 0.08687700  | −3.39546900 | −0.52868600 |
| H | −1.62534600 | −3.46821100 | −0.90171500 |
| C | −0.42387300 | −4.88695600 | −2.05058000 |
| H | 0.61154200  | −5.22574000 | −1.92163900 |
| H | −1.07286900 | −5.66943700 | −1.64527400 |
| C | −0.68256300 | −4.59961100 | −3.53302700 |
| H | −1.76245000 | −4.55296500 | −3.72659100 |
| H | −0.25752500 | −5.35714300 | −4.19936200 |
| C | −0.06058100 | −3.21387000 | −3.72925900 |
| H | −0.39731100 | −2.72223900 | −4.64694700 |
| H | 1.03077300  | −3.31055100 | −3.78813800 |
| C | 2.29090400  | −1.44944700 | −2.13777500 |
| H | 2.49869500  | −1.65061700 | −3.19669700 |

|                                                                    |             |             |             |
|--------------------------------------------------------------------|-------------|-------------|-------------|
| C                                                                  | 3.27361200  | −0.35166500 | −1.62968300 |
| H                                                                  | 3.73340000  | 0.16764100  | −2.47571900 |
| H                                                                  | 2.75385100  | 0.40318300  | −1.03285100 |
| C                                                                  | 4.33082700  | −1.08652600 | −0.77362700 |
| H                                                                  | 5.34332400  | −0.70706800 | −0.94242200 |
| H                                                                  | 4.10340700  | −0.94955000 | 0.29041600  |
| C                                                                  | 4.17552900  | −2.56740400 | −1.13477300 |
| H                                                                  | 4.57062600  | −3.24024300 | −0.36666300 |
| H                                                                  | 4.69685000  | −2.78984800 | −2.07522400 |
| C                                                                  | 2.66406000  | −2.70710600 | −1.32831700 |
| H                                                                  | 2.17691700  | −2.68292300 | −0.34563300 |
| H                                                                  | 2.36990300  | −3.63419200 | −1.83059700 |
| P                                                                  | −0.58616200 | 0.68633700  | 2.08827200  |
| P                                                                  | 0.51430900  | −0.94118800 | −2.00353400 |
| Fe                                                                 | −0.08181700 | −0.03977600 | −0.00179300 |
| H                                                                  | 0.90458700  | −0.98654500 | 0.60284400  |
| H                                                                  | 2.23700200  | 2.59236500  | −0.29083900 |
| H                                                                  | −1.35113400 | −0.98229000 | 0.02347600  |
| H                                                                  | −0.68942400 | −1.42899700 | 0.36692800  |
| C                                                                  | 1.16456700  | 2.75953200  | −0.52378400 |
| O                                                                  | 0.44700700  | 1.70132800  | −0.49047000 |
| O                                                                  | 0.77640100  | 3.89323600  | −0.79802300 |
| <b>5<sub>Fe</sub></b>                                              |             |             |             |
| $G_{\text{solv}} = -3311.901540; E_{\text{solv}} = -3312.68278301$ |             |             |             |
| C                                                                  | −1.08239000 | −0.52158500 | 3.22636500  |
| H                                                                  | −1.25606600 | −0.03326700 | 4.19261600  |
| C                                                                  | −0.05925900 | −1.67989200 | 3.44693800  |
| H                                                                  | 0.78598600  | −1.63583700 | 2.75362900  |
| H                                                                  | 0.35920600  | −1.61605800 | 4.45671600  |
| C                                                                  | −0.85503700 | −2.98899600 | 3.26381400  |
| H                                                                  | −0.73553300 | −3.35815500 | 2.23660800  |
| H                                                                  | −0.51671600 | −3.78331100 | 3.93643200  |
| C                                                                  | −2.31585600 | −2.58768200 | 3.48531800  |
| H                                                                  | −2.52313500 | −2.48680800 | 4.55886200  |
| H                                                                  | −3.02800200 | −3.31031500 | 3.07393700  |
| C                                                                  | −2.39394400 | −1.21902700 | 2.80432000  |
| H                                                                  | −3.27902600 | −0.64057100 | 3.08743300  |
| H                                                                  | −2.42627500 | −1.35901700 | 1.71641400  |
| C                                                                  | 0.85323300  | 1.59943600  | 3.05923800  |
| H                                                                  | 0.48730000  | 1.65161500  | 4.09203600  |
| C                                                                  | 2.17442700  | 0.78697300  | 3.03436100  |
| H                                                                  | 2.22335900  | 0.04378900  | 3.83564200  |
| H                                                                  | 2.26966900  | 0.24774000  | 2.08134700  |
| C                                                                  | 3.28311500  | 1.84018900  | 3.12110200  |
| H                                                                  | 3.39181400  | 2.18882000  | 4.15681500  |
| H                                                                  | 4.25567500  | 1.45863200  | 2.79317400  |
| C                                                                  | 2.74437100  | 2.96724500  | 2.23862300  |
| H                                                                  | 2.85601100  | 2.68853200  | 1.18367500  |
| H                                                                  | 3.25667300  | 3.92265800  | 2.39129300  |
| C                                                                  | 1.25128000  | 3.03656600  | 2.59729400  |
| H                                                                  | 0.65724900  | 3.40800700  | 1.75993600  |
| H                                                                  | 1.09253500  | 3.73599400  | 3.42579000  |
| C                                                                  | −1.83376500 | 2.07055400  | 2.06185900  |
| H                                                                  | −1.37028700 | 2.92674700  | 1.56241100  |
| C                                                                  | −2.35850800 | 2.54588700  | 3.42921500  |
| H                                                                  | −2.55871800 | 1.69918100  | 4.09914900  |
| H                                                                  | −1.65487100 | 3.21348900  | 3.93820600  |
| C                                                                  | −3.68340300 | 3.22323300  | 3.06530200  |

|    |             |             |             |
|----|-------------|-------------|-------------|
| H  | -4.32962400 | 3.39861200  | 3.93199600  |
| H  | -3.48243800 | 4.19423100  | 2.59501900  |
| C  | -4.29579800 | 2.25763800  | 2.04189600  |
| H  | -5.05007400 | 2.73455900  | 1.40839500  |
| H  | -4.79365000 | 1.43628700  | 2.57387100  |
| C  | -3.09847900 | 1.71453800  | 1.22795900  |
| H  | -3.01593300 | 2.18885000  | 0.24670300  |
| H  | -3.20005000 | 0.64317700  | 1.04386700  |
| C  | 0.92697700  | 0.13435900  | -3.45289800 |
| H  | 0.98807200  | -0.52799100 | -4.32709000 |
| C  | 2.24694100  | 0.92379500  | -3.38533500 |
| H  | 3.11973500  | 0.29771100  | -3.59816600 |
| H  | 2.37630900  | 1.36730200  | -2.39313300 |
| C  | 2.03496800  | 2.02262700  | -4.43220600 |
| H  | 2.74952900  | 2.84670300  | -4.33430600 |
| H  | 2.15534000  | 1.59970300  | -5.43855600 |
| C  | 0.58014900  | 2.46438100  | -4.21137500 |
| H  | 0.53928400  | 3.24559900  | -3.44497900 |
| H  | 0.13023300  | 2.88265200  | -5.11722100 |
| C  | -0.16877300 | 1.20345600  | -3.71075900 |
| H  | -0.89134200 | 0.84018300  | -4.44928200 |
| H  | -0.72781500 | 1.43015200  | -2.79640500 |
| C  | -0.90192800 | -1.89935900 | -2.68219500 |
| H  | -1.61682500 | -1.10177600 | -2.92128900 |
| C  | -1.61176200 | -2.87460700 | -1.69450800 |
| H  | -0.99755900 | -3.12612400 | -0.82720100 |
| H  | -2.51905400 | -2.40288800 | -1.30474700 |
| C  | -1.93983500 | -4.14195400 | -2.51459600 |
| H  | -1.18900100 | -4.91807600 | -2.31950500 |
| H  | -2.91594200 | -4.56571800 | -2.25939900 |
| C  | -1.84222300 | -3.70195700 | -3.97934800 |
| H  | -2.75882300 | -3.17760800 | -4.27923500 |
| H  | -1.69568800 | -4.53807200 | -4.67079700 |
| C  | -0.66710700 | -2.72008000 | -3.96732300 |
| H  | -0.62586300 | -2.09266600 | -4.86325100 |
| H  | 0.27543200  | -3.28050300 | -3.91116800 |
| C  | 1.97820000  | -2.12607300 | -1.99237300 |
| H  | 2.22303900  | -2.37630900 | -3.03194700 |
| C  | 3.23510800  | -1.49428900 | -1.31263000 |
| H  | 4.02109000  | -1.33604900 | -2.05765700 |
| H  | 3.02450000  | -0.51509700 | -0.86826100 |
| C  | 3.69514600  | -2.50890700 | -0.24636200 |
| H  | 4.78241300  | -2.52252200 | -0.12243700 |
| H  | 3.25728500  | -2.25453900 | 0.72785500  |
| C  | 3.11971400  | -3.84534100 | -0.72209800 |
| H  | 3.08595500  | -4.60633300 | 0.06450600  |
| H  | 3.71958900  | -4.24447300 | -1.55059900 |
| C  | 1.73024600  | -3.44208100 | -1.22205400 |
| H  | 1.08831300  | -3.26635000 | -0.34988500 |
| H  | 1.24375300  | -4.20271500 | -1.84109900 |
| P  | -0.49522000 | 0.79651000  | 2.05688700  |
| P  | 0.54185000  | -0.94979800 | -2.00624300 |
| Fe | 0.12059800  | 0.00723800  | 0.01770700  |
| H  | 0.22179200  | -1.44694800 | 0.63531300  |
| H  | 1.36476400  | 3.57032200  | -0.89854300 |
| H  | -1.31970200 | -0.02205100 | -0.35329400 |
| H  | -0.60984400 | -1.30822000 | 0.40398200  |
| C  | 0.51476300  | 2.87642200  | -0.73144400 |

|                                                                    |             |             |             |
|--------------------------------------------------------------------|-------------|-------------|-------------|
| O                                                                  | 0.89495500  | 1.67270000  | −0.51376000 |
| O                                                                  | −0.63632600 | 3.30884300  | −0.77682900 |
| <b>6Fe</b>                                                         |             |             |             |
| $G_{\text{solv}} = -3723.528569; E_{\text{solv}} = -3724.49795783$ |             |             |             |
| C                                                                  | −1.32991500 | −1.23890400 | 3.19923600  |
| H                                                                  | −1.64147900 | −0.87425500 | 4.18467200  |
| C                                                                  | −0.06844700 | −2.14080400 | 3.39061100  |
| H                                                                  | 0.79657000  | −1.79397400 | 2.81687300  |
| H                                                                  | 0.23124800  | −2.13178200 | 4.44403200  |
| C                                                                  | −0.49510000 | −3.55898500 | 2.96716400  |
| H                                                                  | −0.26569300 | −3.72112700 | 1.90530700  |
| H                                                                  | 0.02266000  | −4.33951900 | 3.53352500  |
| C                                                                  | −2.01317700 | −3.57223500 | 3.16194700  |
| H                                                                  | −2.25561100 | −3.68643900 | 4.22673800  |
| H                                                                  | −2.51014400 | −4.38199400 | 2.61717300  |
| C                                                                  | −2.43040500 | −2.18398200 | 2.66807800  |
| H                                                                  | −3.42768500 | −1.88525700 | 3.00690600  |
| H                                                                  | −2.44275600 | −2.18209200 | 1.57379700  |
| C                                                                  | −0.08073600 | 1.31143800  | 3.40486500  |
| H                                                                  | −0.59046700 | 1.17531400  | 4.36980700  |
| C                                                                  | 1.39777700  | 0.94178400  | 3.59563900  |
| H                                                                  | 1.53539500  | 0.00882900  | 4.15102300  |
| H                                                                  | 1.87999700  | 0.83773500  | 2.61862400  |
| C                                                                  | 1.96503000  | 2.15387600  | 4.34438600  |
| H                                                                  | 1.72960800  | 2.06507300  | 5.41263900  |
| H                                                                  | 3.05543900  | 2.22801800  | 4.26078900  |
| C                                                                  | 1.23885100  | 3.37203700  | 3.73887300  |
| H                                                                  | 1.85839000  | 3.84753600  | 2.97419300  |
| H                                                                  | 1.02135100  | 4.12783900  | 4.50062800  |
| C                                                                  | −0.05157200 | 2.82236700  | 3.08329200  |
| H                                                                  | −0.00051000 | 2.98398100  | 2.00375600  |
| H                                                                  | −0.95240600 | 3.32492100  | 3.44961200  |
| C                                                                  | −2.63423400 | 1.19090600  | 2.15992700  |
| H                                                                  | −2.35756600 | 2.19080600  | 1.80232100  |
| C                                                                  | −3.35253100 | 1.37089600  | 3.50900400  |
| H                                                                  | −3.48387000 | 0.40467800  | 4.01466400  |
| H                                                                  | −2.81899900 | 2.03685700  | 4.19508700  |
| C                                                                  | −4.71826900 | 1.91763500  | 3.08429700  |
| H                                                                  | −5.46985800 | 1.86317000  | 3.87905200  |
| H                                                                  | −4.61293200 | 2.97225400  | 2.79978800  |
| C                                                                  | −5.08240900 | 1.06903900  | 1.85422700  |
| H                                                                  | −5.73194700 | 1.60973300  | 1.15915800  |
| H                                                                  | −5.62997200 | 0.17393500  | 2.17264100  |
| C                                                                  | −3.73381000 | 0.66499200  | 1.20256000  |
| H                                                                  | −3.59685200 | 1.10235500  | 0.21136200  |
| H                                                                  | −3.67990300 | −0.41825300 | 1.07643300  |
| C                                                                  | −0.38317900 | −0.28069900 | −3.53578500 |
| H                                                                  | −0.64957200 | −1.00841700 | −4.31116600 |
| C                                                                  | 0.84851700  | 0.48970600  | −4.05014400 |
| H                                                                  | 1.53665900  | −0.16074000 | −4.60118600 |
| H                                                                  | 1.39995500  | 0.93987000  | −3.22191200 |
| C                                                                  | 0.23081200  | 1.59004800  | −4.91806100 |
| H                                                                  | 0.93712500  | 2.39445200  | −5.15307000 |
| H                                                                  | −0.12623200 | 1.17242200  | −5.86962100 |
| C                                                                  | −0.95250900 | 2.06335300  | −4.06825600 |
| H                                                                  | −0.58188200 | 2.73162700  | −3.28115000 |
| H                                                                  | −1.70274900 | 2.62037600  | −4.63834100 |
| C                                                                  | −1.52424500 | 0.77546300  | −3.43684500 |

|    |             |             |             |
|----|-------------|-------------|-------------|
| H  | -2.40413000 | 0.42767600  | -3.98967500 |
| H  | -1.84418300 | 0.95043700  | -2.40523000 |
| C  | -1.69329800 | -2.36715200 | -2.17484700 |
| H  | -2.50420000 | -1.62806300 | -2.19559300 |
| C  | -2.00511000 | -3.35869200 | -1.01056700 |
| H  | -1.16568900 | -3.50582700 | -0.32700300 |
| H  | -2.82816400 | -2.96095100 | -0.41007500 |
| C  | -2.40887600 | -4.69030100 | -1.67566800 |
| H  | -1.54504400 | -5.36567500 | -1.72401200 |
| H  | -3.19696700 | -5.21171700 | -1.12320200 |
| C  | -2.82383900 | -4.29887600 | -3.09591100 |
| H  | -3.83483400 | -3.87069400 | -3.08977600 |
| H  | -2.82286900 | -5.14122100 | -3.79533800 |
| C  | -1.80468100 | -3.21632000 | -3.46158400 |
| H  | -2.11295600 | -2.62612100 | -4.32966100 |
| H  | -0.84761000 | -3.69303800 | -3.70902600 |
| C  | 1.23607600  | -2.40482900 | -2.39087200 |
| H  | 1.08081500  | -2.75368300 | -3.41902100 |
| C  | 2.63460500  | -1.71932100 | -2.30150600 |
| H  | 3.09382900  | -1.70136600 | -3.29653500 |
| H  | 2.58241700  | -0.68556300 | -1.95551300 |
| C  | 3.46857000  | -2.59228000 | -1.34565000 |
| H  | 4.53530200  | -2.58717000 | -1.59371600 |
| H  | 3.36696900  | -2.21896100 | -0.31760000 |
| C  | 2.82799100  | -3.97844100 | -1.44454800 |
| H  | 3.10010100  | -4.64574900 | -0.61986500 |
| H  | 3.12252700  | -4.46622200 | -2.38325300 |
| C  | 1.33439300  | -3.64402400 | -1.46968300 |
| H  | 1.02232700  | -3.39434600 | -0.44829800 |
| H  | 0.70301400  | -4.47029400 | -1.81200800 |
| P  | -1.01568100 | 0.28075600  | 2.16931600  |
| P  | -0.18541400 | -1.27794500 | -1.98258700 |
| Fe | -0.22899200 | -0.26761100 | 0.08981900  |
| H  | 0.35000400  | -1.60507800 | 0.68765400  |
| H  | 0.03929800  | 3.66133600  | -0.54405800 |
| H  | -1.69438800 | -0.55507500 | -0.08930600 |
| H  | -0.49500400 | -1.72279500 | 0.57057000  |
| C  | -0.65579100 | 2.81040300  | -0.58482700 |
| O  | -0.04244800 | 1.64018500  | -0.58875500 |
| O  | -1.85721700 | 2.94276300  | -0.63260400 |
| C  | 3.28585700  | 2.37751100  | -1.25095200 |
| C  | 3.29644900  | 2.63694100  | 0.29481400  |
| H  | 1.37649300  | 0.19654300  | 0.28111500  |
| C  | 4.60075900  | 1.85834400  | -1.82254100 |
| H  | 4.49567500  | 1.69971800  | -2.90078700 |
| H  | 5.41273000  | 2.57665400  | -1.66309300 |
| H  | 4.88166300  | 0.90405900  | -1.37126900 |
| C  | 4.18657800  | 1.64366400  | 1.04971400  |
| H  | 5.24914900  | 1.82635600  | 0.86061900  |
| H  | 4.00822600  | 1.75441200  | 2.12329100  |
| H  | 3.95684400  | 0.61025700  | 0.77170200  |
| C  | 2.82160100  | 3.59233600  | -2.06185500 |
| H  | 3.58211100  | 4.37946800  | -2.09046900 |
| H  | 2.61937800  | 3.27418400  | -3.08935200 |
| H  | 1.90051000  | 4.02082700  | -1.65682600 |
| C  | 3.66843200  | 4.06055100  | 0.68824100  |
| H  | 3.73571500  | 4.14783700  | 1.77677500  |
| H  | 4.64478800  | 4.33341200  | 0.27244100  |

|                                                                    |             |             |             |
|--------------------------------------------------------------------|-------------|-------------|-------------|
| H                                                                  | 2.92551500  | 4.78008500  | 0.33572300  |
| O                                                                  | 2.30682900  | 1.35142000  | −1.37094300 |
| O                                                                  | 1.93602400  | 2.38475900  | 0.65283000  |
| B                                                                  | 1.42674200  | 1.39774900  | −0.24884500 |
| <b>TS<sub>6,7</sub>-Fe</b>                                         |             |             |             |
| $G_{\text{solv}} = -3723.495355; E_{\text{solv}} = -3724.46110883$ |             |             |             |
| C                                                                  | −2.05409700 | −0.99264600 | 3.07133200  |
| H                                                                  | −2.24495500 | −0.52172200 | 4.04413700  |
| C                                                                  | −1.26639800 | −2.31253300 | 3.32495600  |
| H                                                                  | −0.45520500 | −2.44570800 | 2.60253400  |
| H                                                                  | −0.80685900 | −2.29100400 | 4.31859900  |
| C                                                                  | −2.30254700 | −3.45535500 | 3.20529700  |
| H                                                                  | −2.18714200 | −3.96073400 | 2.23850900  |
| H                                                                  | −2.18041900 | −4.21590700 | 3.98260600  |
| C                                                                  | −3.67079200 | −2.76486500 | 3.25731500  |
| H                                                                  | −3.95575900 | −2.56170100 | 4.29799600  |
| H                                                                  | −4.46973200 | −3.36164900 | 2.80520800  |
| C                                                                  | −3.42023000 | −1.44507800 | 2.52214800  |
| H                                                                  | −4.20512600 | −0.70052000 | 2.69007700  |
| H                                                                  | −3.37343400 | −1.63636300 | 1.44339400  |
| C                                                                  | 0.15821300  | 0.74944900  | 3.36289900  |
| H                                                                  | −0.32368000 | 0.61628900  | 4.34324200  |
| C                                                                  | 1.45393700  | −0.07715700 | 3.32910100  |
| H                                                                  | 1.31723300  | −1.10744700 | 3.67113300  |
| H                                                                  | 1.81140800  | −0.12254100 | 2.29479800  |
| C                                                                  | 2.42944100  | 0.71762700  | 4.21751400  |
| H                                                                  | 2.39899200  | 0.34115400  | 5.24599900  |
| H                                                                  | 3.46390300  | 0.61075400  | 3.87270600  |
| C                                                                  | 1.93845400  | 2.18932800  | 4.17074900  |
| H                                                                  | 2.70478500  | 2.87151500  | 3.78527100  |
| H                                                                  | 1.68640100  | 2.53785600  | 5.17829700  |
| C                                                                  | 0.68327900  | 2.18935900  | 3.27389800  |
| H                                                                  | 0.95435800  | 2.41906900  | 2.23980500  |
| H                                                                  | −0.05471800 | 2.93106900  | 3.59710400  |
| C                                                                  | −2.22639100 | 1.71831800  | 1.98742000  |
| H                                                                  | −1.56827300 | 2.54813000  | 1.69577800  |
| C                                                                  | −2.98945300 | 2.16611800  | 3.24555200  |
| H                                                                  | −3.45401900 | 1.31038800  | 3.75132200  |
| H                                                                  | −2.34564400 | 2.67110900  | 3.97332700  |
| C                                                                  | −4.08408600 | 3.06904900  | 2.66844100  |
| H                                                                  | −4.88766800 | 3.28024800  | 3.38164300  |
| H                                                                  | −3.64769200 | 4.02895000  | 2.36451600  |
| C                                                                  | −4.56873600 | 2.29442800  | 1.43351500  |
| H                                                                  | −5.02587400 | 2.94657600  | 0.68393200  |
| H                                                                  | −5.32888600 | 1.56346500  | 1.73610500  |
| C                                                                  | −3.31630200 | 1.56457200  | 0.88840700  |
| H                                                                  | −2.97355100 | 2.00451300  | −0.05217100 |
| H                                                                  | −3.54054000 | 0.51403100  | 0.67989500  |
| C                                                                  | −0.61023800 | −0.78672800 | −3.48445100 |
| H                                                                  | −0.60828700 | −1.56225700 | −4.25947300 |
| C                                                                  | 0.25393200  | 0.38569300  | −3.98545500 |
| H                                                                  | 1.10617700  | 0.04082700  | −4.58115500 |
| H                                                                  | 0.65394800  | 0.96678000  | −3.15184300 |
| C                                                                  | −0.72880100 | 1.24855100  | −4.78270700 |
| H                                                                  | −0.35260000 | 2.26189600  | −4.95942300 |
| H                                                                  | −0.93122100 | 0.78934400  | −5.76011800 |
| C                                                                  | −1.98890400 | 1.22759100  | −3.91142500 |
| H                                                                  | −1.86798300 | 1.94151700  | −3.09000100 |

|    |             |             |             |
|----|-------------|-------------|-------------|
| H  | -2.89621300 | 1.50196300  | -4.45926300 |
| C  | -2.05210600 | -0.20941600 | -3.34939200 |
| H  | -2.75973800 | -0.82736800 | -3.91351000 |
| H  | -2.40049700 | -0.20566700 | -2.30763800 |
| C  | -1.05834100 | -3.15031500 | -2.00673000 |
| H  | -2.08598700 | -2.76739300 | -2.07409000 |
| C  | -0.99492600 | -4.10066300 | -0.76856300 |
| H  | -0.17131600 | -3.86261800 | -0.09103300 |
| H  | -1.91676800 | -4.00200100 | -0.18498900 |
| C  | -0.86999700 | -5.53052000 | -1.33353500 |
| H  | 0.18204300  | -5.84169400 | -1.34405800 |
| H  | -1.41834700 | -6.26583800 | -0.73629600 |
| C  | -1.38014900 | -5.42251500 | -2.77339900 |
| H  | -2.47808700 | -5.40200300 | -2.78490900 |
| H  | -1.05588500 | -6.25212400 | -3.41022700 |
| C  | -0.83159500 | -4.06738200 | -3.22907500 |
| H  | -1.32385900 | -3.69254300 | -4.13165600 |
| H  | 0.23742300  | -4.16941700 | -3.45417200 |
| C  | 1.68274500  | -2.12460800 | -2.27390800 |
| H  | 1.68691800  | -2.51928600 | -3.29820000 |
| C  | 2.72290800  | -0.97498800 | -2.17244800 |
| H  | 3.02347200  | -0.64508700 | -3.17213700 |
| H  | 2.30138500  | -0.10335400 | -1.66781100 |
| C  | 3.92351400  | -1.55412300 | -1.38751500 |
| H  | 4.88859100  | -1.23343500 | -1.79502500 |
| H  | 3.88016700  | -1.21913500 | -0.34372600 |
| C  | 3.73361300  | -3.07379400 | -1.43424300 |
| H  | 4.26912300  | -3.59878300 | -0.63630200 |
| H  | 4.08616800  | -3.47374900 | -2.39448500 |
| C  | 2.21461000  | -3.22280900 | -1.33143300 |
| H  | 1.90318700  | -3.01663500 | -0.30004700 |
| H  | 1.85543800  | -4.22078900 | -1.60277700 |
| P  | -1.09022400 | 0.25760600  | 2.07802200  |
| P  | -0.04797400 | -1.57951100 | -1.90471800 |
| Fe | -0.47622700 | -0.48691400 | 0.03561700  |
| H  | 0.53093300  | -1.39102100 | 0.68194900  |
| H  | -0.39449900 | 4.39563500  | 0.21519400  |
| H  | -1.76688200 | -1.43243100 | 0.10330700  |
| H  | -1.11047200 | -1.84124800 | 0.49069400  |
| C  | -0.99705600 | 3.86865600  | -0.53997900 |
| O  | -0.38591700 | 2.83059700  | -1.10887100 |
| O  | -2.11654300 | 4.20555100  | -0.84096300 |
| C  | 3.09181100  | 2.95004100  | -1.51291600 |
| C  | 3.01674200  | 3.01345000  | 0.05018900  |
| H  | 0.59100700  | 0.69683700  | -0.20020200 |
| C  | 4.26461200  | 2.15529200  | -2.06216900 |
| H  | 4.20718300  | 2.11907600  | -3.15417100 |
| H  | 5.20889500  | 2.63737600  | -1.78719000 |
| H  | 4.27549900  | 1.13228000  | -1.68807400 |
| C  | 3.48710600  | 1.72528500  | 0.72195100  |
| H  | 4.56560100  | 1.58655400  | 0.60094500  |
| H  | 3.27217100  | 1.78452100  | 1.79057600  |
| H  | 2.96186800  | 0.85528200  | 0.31986100  |
| C  | 3.04350200  | 4.33104500  | -2.17081500 |
| H  | 3.97663100  | 4.88213500  | -2.01920000 |
| H  | 2.88857500  | 4.20459300  | -3.24609000 |
| H  | 2.21677600  | 4.93357500  | -1.78074400 |
| C  | 3.70092700  | 4.21871700  | 0.67503900  |

|                                                                    |             |             |             |
|--------------------------------------------------------------------|-------------|-------------|-------------|
| H                                                                  | 3.58066300  | 4.18740100  | 1.76210300  |
| H                                                                  | 4.77330100  | 4.20920000  | 0.45315200  |
| H                                                                  | 3.27666300  | 5.15840000  | 0.31490800  |
| O                                                                  | 1.85259900  | 2.28562700  | −1.84788100 |
| O                                                                  | 1.59123800  | 3.13401100  | 0.26613200  |
| B                                                                  | 0.97259300  | 2.55465100  | −0.82146200 |
| <b>7<sub>Fe</sub></b>                                              |             |             |             |
| $G_{\text{solv}} = -3723.508931; E_{\text{solv}} = -3724.47147899$ |             |             |             |
| C                                                                  | −2.18271200 | −1.17322900 | 3.44032900  |
| H                                                                  | −2.30494900 | −0.61216100 | 4.37548900  |
| C                                                                  | −1.39778800 | −2.48599000 | 3.74858300  |
| H                                                                  | −0.55653600 | −2.63204600 | 3.06396000  |
| H                                                                  | −0.98386800 | −2.44386500 | 4.76145100  |
| C                                                                  | −2.42265700 | −3.63415100 | 3.61968700  |
| H                                                                  | −2.33939200 | −4.09704200 | 2.62804400  |
| H                                                                  | −2.26474400 | −4.42343400 | 4.36142900  |
| C                                                                  | −3.78944400 | −2.95362000 | 3.74491700  |
| H                                                                  | −4.01539400 | −2.74418200 | 4.79892000  |
| H                                                                  | −4.60969700 | −3.55644000 | 3.34123000  |
| C                                                                  | −3.57950000 | −1.64229500 | 2.98353000  |
| H                                                                  | −4.35549500 | −0.89401800 | 3.17533300  |
| H                                                                  | −3.58369100 | −1.85344600 | 1.90688600  |
| C                                                                  | 0.02984300  | 0.63347000  | 3.33031500  |
| H                                                                  | −0.46115800 | 0.89427200  | 4.27922100  |
| C                                                                  | 1.20594400  | −0.33058900 | 3.62356600  |
| H                                                                  | 1.00050600  | −0.94814100 | 4.50300900  |
| H                                                                  | 1.35488400  | −1.00594400 | 2.77562500  |
| C                                                                  | 2.45542300  | 0.56933300  | 3.82260100  |
| H                                                                  | 2.95971600  | 0.37962700  | 4.77555800  |
| H                                                                  | 3.18395300  | 0.36998900  | 3.02789700  |
| C                                                                  | 1.94364200  | 2.01575700  | 3.71630600  |
| H                                                                  | 2.69800500  | 2.71505000  | 3.33802100  |
| H                                                                  | 1.62906800  | 2.38153300  | 4.70238500  |
| C                                                                  | 0.72043600  | 1.90028800  | 2.80320800  |
| H                                                                  | 1.03800800  | 1.74450700  | 1.76410900  |
| H                                                                  | 0.07843800  | 2.78742300  | 2.84192000  |
| C                                                                  | −2.41694600 | 1.38985100  | 2.01747600  |
| H                                                                  | −1.75832100 | 2.16128400  | 1.60423900  |
| C                                                                  | −3.10906400 | 1.99840100  | 3.24999500  |
| H                                                                  | −3.52497800 | 1.21852800  | 3.90040800  |
| H                                                                  | −2.42534900 | 2.60349600  | 3.85549200  |
| C                                                                  | −4.25323900 | 2.80965100  | 2.63277700  |
| H                                                                  | −5.01656000 | 3.10055200  | 3.36221800  |
| H                                                                  | −3.85392100 | 3.72677700  | 2.18131900  |
| C                                                                  | −4.79374500 | 1.87825000  | 1.53926000  |
| H                                                                  | −5.35315000 | 2.41414300  | 0.76674800  |
| H                                                                  | −5.47778500 | 1.14753400  | 1.98908300  |
| C                                                                  | −3.54778100 | 1.15848900  | 0.97299500  |
| H                                                                  | −3.24630100 | 1.58387300  | 0.01042500  |
| H                                                                  | −3.75150400 | 0.09634200  | 0.80297300  |
| C                                                                  | −0.70483100 | −0.81857100 | −3.17459300 |
| H                                                                  | −0.52328500 | −1.41395300 | −4.07810300 |
| C                                                                  | 0.03347300  | 0.52581100  | −3.32503700 |
| H                                                                  | 0.99228900  | 0.42402800  | −3.84227600 |
| H                                                                  | 0.23188000  | 0.95886900  | −2.33894000 |
| C                                                                  | −0.96923000 | 1.41153100  | −4.06730600 |
| H                                                                  | −0.71562200 | 2.47433400  | −4.01014300 |
| H                                                                  | −1.01307500 | 1.12660100  | −5.12761100 |

|    |             |             |             |
|----|-------------|-------------|-------------|
| C  | -2.29100100 | 1.07581500  | -3.37034300 |
| H  | -2.33932900 | 1.62144000  | -2.42061100 |
| H  | -3.17321400 | 1.35718300  | -3.95408000 |
| C  | -2.21697700 | -0.44373300 | -3.10348800 |
| H  | -2.78105400 | -1.00741100 | -3.85475300 |
| H  | -2.65933600 | -0.69268400 | -2.12930000 |
| C  | -1.04898500 | -3.43507400 | -2.12690700 |
| H  | -2.09750100 | -3.12588200 | -2.23387500 |
| C  | -0.99609200 | -4.53407100 | -1.01949000 |
| H  | -0.24990500 | -4.32446200 | -0.24865300 |
| H  | -1.96289800 | -4.58558300 | -0.50736100 |
| C  | -0.69824400 | -5.85875800 | -1.75180500 |
| H  | 0.37621600  | -6.07745600 | -1.71016900 |
| H  | -1.21929600 | -6.71183100 | -1.30579600 |
| C  | -1.10451000 | -5.59797700 | -3.20579500 |
| H  | -2.19556300 | -5.66422100 | -3.31057900 |
| H  | -0.65886000 | -6.30583400 | -3.91243200 |
| C  | -0.64790800 | -4.15370500 | -3.43320000 |
| H  | -1.10115800 | -3.69465300 | -4.31769900 |
| H  | 0.43991700  | -4.13962700 | -3.57545200 |
| C  | 1.60202800  | -2.16590000 | -2.02456900 |
| H  | 1.70053800  | -2.42504000 | -3.08615700 |
| C  | 2.52218500  | -0.94594100 | -1.72294800 |
| H  | 2.93457700  | -0.55135800 | -2.65795800 |
| H  | 1.96717100  | -0.13621100 | -1.24342400 |
| C  | 3.63989900  | -1.47741700 | -0.80297400 |
| H  | 4.60541400  | -0.99147800 | -0.98391900 |
| H  | 3.36842100  | -1.29586600 | 0.24475600  |
| C  | 3.66731800  | -2.98593500 | -1.06319100 |
| H  | 4.17063800  | -3.55133700 | -0.27184800 |
| H  | 4.18233800  | -3.20030000 | -2.00969500 |
| C  | 2.17934600  | -3.32396900 | -1.18204300 |
| H  | 1.73581700  | -3.31604300 | -0.17939400 |
| H  | 1.98720500  | -4.30419800 | -1.63103300 |
| P  | -1.29418100 | -0.06958400 | 2.23611900  |
| P  | -0.19400100 | -1.83137500 | -1.70879400 |
| Fe | -0.77310500 | -0.97771000 | 0.27433600  |
| H  | 0.36928700  | -1.73591000 | 0.89869200  |
| H  | -0.13597900 | 3.11943800  | 0.41506900  |
| H  | -1.92797000 | -2.10178800 | 0.42534900  |
| H  | -1.20489700 | -2.40959500 | 0.77702400  |
| C  | -0.57855600 | 3.41128500  | -0.54686000 |
| O  | 0.29443400  | 3.43443800  | -1.56945500 |
| O  | -1.73841000 | 3.68774900  | -0.69934500 |
| C  | 3.84939600  | 3.25137300  | -1.85249700 |
| C  | 3.65028500  | 3.29713500  | -0.28907100 |
| H  | 0.10874700  | 0.28902500  | -0.00273800 |
| C  | 4.77970700  | 2.15173100  | -2.33660200 |
| H  | 4.83631700  | 2.17298800  | -3.42874400 |
| H  | 5.78931800  | 2.30103300  | -1.94008400 |
| H  | 4.42629100  | 1.16503800  | -2.03311800 |
| C  | 3.79345900  | 1.93530400  | 0.38330200  |
| H  | 4.82530900  | 1.57516000  | 0.34195200  |
| H  | 3.50772000  | 2.02942900  | 1.43249800  |
| H  | 3.14111400  | 1.18941200  | -0.07521400 |
| C  | 4.25429100  | 4.59627000  | -2.45349000 |
| H  | 5.27942400  | 4.86280300  | -2.18031200 |
| H  | 4.19649800  | 4.52863700  | -3.54341200 |

|                                                                    |             |             |             |
|--------------------------------------------------------------------|-------------|-------------|-------------|
| H                                                                  | 3.58722900  | 5.40153400  | −2.13037700 |
| C                                                                  | 4.49916900  | 4.33320000  | 0.42935500  |
| H                                                                  | 4.28292900  | 4.30507400  | 1.50123000  |
| H                                                                  | 5.56364100  | 4.11584600  | 0.29347000  |
| H                                                                  | 4.29920900  | 5.34447800  | 0.06998200  |
| O                                                                  | 2.50947200  | 2.96679900  | −2.33524800 |
| O                                                                  | 2.25222000  | 3.68104000  | −0.16665100 |
| B                                                                  | 1.65868900  | 3.34469700  | −1.34726600 |
| <b>8Fe</b>                                                         |             |             |             |
| $G_{\text{solv}} = -3723.526347; E_{\text{solv}} = -3724.49768633$ |             |             |             |
| C                                                                  | −2.07980600 | −1.39995100 | 2.76333300  |
| H                                                                  | −2.14046800 | −1.63352000 | 3.83445700  |
| C                                                                  | −2.20320500 | −2.73120800 | 1.96011500  |
| H                                                                  | −1.41875000 | −2.81713400 | 1.20537900  |
| H                                                                  | −2.10847400 | −3.58575900 | 2.63859400  |
| C                                                                  | −3.59796200 | −2.69834600 | 1.30147800  |
| H                                                                  | −3.49830400 | −2.34375200 | 0.27028400  |
| H                                                                  | −4.07489300 | −3.68380700 | 1.27913100  |
| C                                                                  | −4.38813500 | −1.66863900 | 2.11445100  |
| H                                                                  | −4.73539300 | −2.10847600 | 3.05961500  |
| H                                                                  | −5.26445600 | −1.28068200 | 1.58452200  |
| C                                                                  | −3.33877800 | −0.58930000 | 2.39261700  |
| H                                                                  | −3.63013000 | 0.11195400  | 3.18235000  |
| H                                                                  | −3.17658500 | −0.01801400 | 1.47408800  |
| C                                                                  | 0.60442900  | −1.46379500 | 3.73926300  |
| H                                                                  | 0.09999100  | −1.33320400 | 4.70470800  |
| C                                                                  | 0.74801800  | −2.98122700 | 3.48390100  |
| H                                                                  | −0.07773000 | −3.55129000 | 3.92025100  |
| H                                                                  | 0.76441300  | −3.18816600 | 2.40796900  |
| C                                                                  | 2.10896900  | −3.33592000 | 4.09149600  |
| H                                                                  | 2.03442500  | −3.39344700 | 5.18577700  |
| H                                                                  | 2.49707600  | −4.29474800 | 3.73203700  |
| C                                                                  | 2.97810800  | −2.14509000 | 3.68280000  |
| H                                                                  | 3.24375800  | −2.24860500 | 2.62453400  |
| H                                                                  | 3.91051900  | −2.06570900 | 4.25111400  |
| C                                                                  | 2.06063500  | −0.92291600 | 3.87048600  |
| H                                                                  | 2.29440800  | −0.13372600 | 3.14855900  |
| H                                                                  | 2.20199800  | −0.48607000 | 4.86556300  |
| C                                                                  | −0.56763800 | 1.08055000  | 3.40251300  |
| H                                                                  | 0.48725300  | 1.38229800  | 3.48322800  |
| C                                                                  | −1.17510700 | 1.09350500  | 4.83197300  |
| H                                                                  | −1.89278900 | 0.27994900  | 4.97866200  |
| H                                                                  | −0.39073300 | 0.96043900  | 5.58416300  |
| C                                                                  | −1.87868900 | 2.46805000  | 4.97855300  |
| H                                                                  | −2.96668000 | 2.33472800  | 4.95495000  |
| H                                                                  | −1.63743900 | 2.96235700  | 5.92473200  |
| C                                                                  | −1.43852300 | 3.28536600  | 3.75407800  |
| H                                                                  | −0.47013400 | 3.76734500  | 3.94541900  |
| H                                                                  | −2.15297900 | 4.07202100  | 3.48865900  |
| C                                                                  | −1.28023600 | 2.22591800  | 2.66131400  |
| H                                                                  | −0.72566100 | 2.57595600  | 1.78652600  |
| H                                                                  | −2.27291700 | 1.91621900  | 2.31608400  |
| C                                                                  | 1.58207300  | −0.04835500 | −3.04738900 |
| H                                                                  | 2.44010900  | −0.43574100 | −3.61684300 |
| C                                                                  | 1.85286400  | 1.42991400  | −2.72631500 |
| H                                                                  | 2.85211100  | 1.60875200  | −2.31733200 |
| H                                                                  | 1.12865400  | 1.77778300  | −1.97893400 |
| C                                                                  | 1.63450500  | 2.13635800  | −4.07081600 |

|    |             |             |             |
|----|-------------|-------------|-------------|
| H  | 1.38295600  | 3.19579800  | −3.95102200 |
| H  | 2.55918100  | 2.08810800  | −4.65919400 |
| C  | 0.50669400  | 1.34516000  | −4.77084100 |
| H  | −0.43232000 | 1.90425800  | −4.74041400 |
| H  | 0.74974200  | 1.16872300  | −5.82394800 |
| C  | 0.36271600  | 0.01433000  | −3.99170200 |
| H  | 0.32354600  | −0.85126900 | −4.65996500 |
| H  | −0.56010700 | 0.02666200  | −3.40734100 |
| C  | 0.58191100  | −2.63427400 | −2.30127000 |
| H  | −0.33694400 | −2.22467700 | −2.73885800 |
| C  | 0.15624400  | −3.75343700 | −1.32420100 |
| H  | 0.88218200  | −3.87073600 | −0.51526600 |
| H  | −0.79638800 | −3.49931800 | −0.85432400 |
| C  | 0.08609100  | −5.04684400 | −2.18003100 |
| H  | 0.79337600  | −5.79129100 | −1.79688700 |
| H  | −0.90614600 | −5.50739900 | −2.15031000 |
| C  | 0.48109400  | −4.63180100 | −3.61154900 |
| H  | −0.41229600 | −4.36506100 | −4.19000600 |
| H  | 1.00017800  | −5.42664200 | −4.15741700 |
| C  | 1.34219900  | −3.38142000 | −3.40849000 |
| H  | 1.47090400  | −2.79274000 | −4.32269700 |
| H  | 2.34062400  | −3.67749100 | −3.05935600 |
| C  | 3.16678900  | −1.64164100 | −1.30629400 |
| H  | 3.53727100  | −1.94795300 | −2.29191800 |
| C  | 4.06461100  | −0.47110700 | −0.79709300 |
| H  | 4.73041900  | −0.13806700 | −1.60056700 |
| H  | 3.48290200  | 0.40252900  | −0.48896000 |
| C  | 4.87185200  | −1.03895500 | 0.38786600  |
| H  | 5.88620800  | −0.63084600 | 0.44004400  |
| H  | 4.37045600  | −0.78748900 | 1.33141600  |
| C  | 4.84055200  | −2.55703700 | 0.18819900  |
| H  | 5.06641000  | −3.11474400 | 1.10358600  |
| H  | 5.57485200  | −2.85353100 | −0.57250700 |
| C  | 3.41903100  | −2.80547200 | −0.32510000 |
| H  | 2.71320900  | −2.75928900 | 0.51157200  |
| H  | 3.29754100  | −3.78251600 | −0.80465900 |
| P  | −0.44979300 | −0.54831500 | 2.50850700  |
| P  | 1.38895700  | −1.14670300 | −1.54722200 |
| Fe | 0.36919300  | −0.51395800 | 0.38358100  |
| H  | 1.62557500  | 0.31473800  | 0.86971800  |
| H  | −0.28488600 | 1.00207700  | −0.04120600 |
| H  | 0.72763500  | −1.92953600 | 0.72143800  |
| H  | 1.79572900  | −0.52654100 | 1.02529900  |
| C  | −1.60855700 | 4.68333000  | −2.52313200 |
| C  | −0.92697000 | 4.69302800  | −1.10480900 |
| C  | −0.90140800 | 5.52838200  | −3.57128200 |
| H  | −1.43185500 | 5.45249400  | −4.52494700 |
| H  | −0.88834800 | 6.58189400  | −3.27227500 |
| H  | 0.12685400  | 5.19703900  | −3.73005200 |
| C  | 0.59138100  | 4.86130600  | −1.16420200 |
| H  | 0.87132600  | 5.88118400  | −1.44476300 |
| H  | 1.00852300  | 4.64967000  | −0.17525000 |
| H  | 1.04527800  | 4.16665800  | −1.87668300 |
| C  | −3.09542700 | 5.03739900  | −2.47509300 |
| H  | −3.24999200 | 6.09635800  | −2.24685200 |
| H  | −3.54124300 | 4.82742700  | −3.45147600 |
| H  | −3.62671700 | 4.43967900  | −1.72782500 |
| C  | −1.52331200 | 5.68159900  | −0.11423100 |

|                                                                    |             |             |             |
|--------------------------------------------------------------------|-------------|-------------|-------------|
| H                                                                  | -0.98744100 | 5.61631700  | 0.83751600  |
| H                                                                  | -1.42903900 | 6.70673900  | -0.48743600 |
| H                                                                  | -2.57796500 | 5.47371400  | 0.07794200  |
| O                                                                  | -1.51639400 | 3.29304000  | -2.90543900 |
| O                                                                  | -1.18605800 | 3.35412200  | -0.63379800 |
| B                                                                  | -1.40482300 | 2.56650800  | -1.74468200 |
| O                                                                  | -1.49652600 | 1.21680200  | -1.70101200 |
| C                                                                  | -1.34465600 | 0.57631300  | -0.41785500 |
| H                                                                  | -2.05543600 | 1.06901600  | 0.26436800  |
| O                                                                  | -1.40944200 | -0.73547300 | -0.45966700 |
| <b>9<sub>Fe</sub></b>                                              |             |             |             |
| $G_{\text{solv}} = -3723.531326; E_{\text{solv}} = -3724.50603350$ |             |             |             |
| C                                                                  | -2.53760900 | -1.35739600 | 2.50984300  |
| H                                                                  | -2.75597500 | -1.15861200 | 3.56645600  |
| C                                                                  | -2.28809400 | -2.88929600 | 2.33528600  |
| H                                                                  | -1.29474000 | -3.11529200 | 1.94439700  |
| H                                                                  | -2.38158900 | -3.38633400 | 3.30836400  |
| C                                                                  | -3.37601500 | -3.38440200 | 1.36848000  |
| H                                                                  | -3.01075300 | -3.30178400 | 0.33734200  |
| H                                                                  | -3.65259500 | -4.42925800 | 1.54673200  |
| C                                                                  | -4.52977300 | -2.40284000 | 1.57281500  |
| H                                                                  | -5.05420400 | -2.62473500 | 2.51307200  |
| H                                                                  | -5.26703600 | -2.42709000 | 0.76340600  |
| C                                                                  | -3.80452000 | -1.05757000 | 1.66592300  |
| H                                                                  | -4.42304400 | -0.27421500 | 2.11613000  |
| H                                                                  | -3.50967100 | -0.73503100 | 0.66007500  |
| C                                                                  | 0.18862200  | -0.72569700 | 3.34994200  |
| H                                                                  | -0.30609100 | -0.61076700 | 4.32118900  |
| C                                                                  | 0.78745700  | -2.14982800 | 3.30706400  |
| H                                                                  | 0.16327200  | -2.87454000 | 3.83779400  |
| H                                                                  | 0.88952000  | -2.50062800 | 2.27343200  |
| C                                                                  | 2.17640500  | -1.98580200 | 3.93167400  |
| H                                                                  | 2.09127600  | -1.89057300 | 5.02246700  |
| H                                                                  | 2.84030300  | -2.83129600 | 3.72181800  |
| C                                                                  | 2.66580000  | -0.66983200 | 3.32348400  |
| H                                                                  | 3.00310000  | -0.85637200 | 2.29548900  |
| H                                                                  | 3.50619600  | -0.22381700 | 3.86532300  |
| C                                                                  | 1.41934100  | 0.23719000  | 3.30836100  |
| H                                                                  | 1.41982900  | 0.89138300  | 2.42944800  |
| H                                                                  | 1.40509900  | 0.89189000  | 4.18725100  |
| C                                                                  | -1.53236700 | 1.40457600  | 2.64807500  |
| H                                                                  | -0.58509300 | 1.95054900  | 2.56234400  |
| C                                                                  | -2.03980600 | 1.52073000  | 4.11840600  |
| H                                                                  | -2.03308700 | 0.57313900  | 4.66471400  |
| H                                                                  | -1.38692800 | 2.20450600  | 4.67470900  |
| C                                                                  | -3.45462700 | 2.10878900  | 4.02719000  |
| H                                                                  | -4.18532700 | 1.30443400  | 3.87271400  |
| H                                                                  | -3.74628000 | 2.65022600  | 4.93313300  |
| C                                                                  | -3.39468200 | 2.99267000  | 2.78093100  |
| H                                                                  | -2.85334700 | 3.92126800  | 3.01152700  |
| H                                                                  | -4.38129400 | 3.27176600  | 2.39649000  |
| C                                                                  | -2.59053700 | 2.14606900  | 1.78747000  |
| H                                                                  | -2.12636200 | 2.75995700  | 1.01226100  |
| H                                                                  | -3.25437300 | 1.44404700  | 1.27777400  |
| C                                                                  | 0.45085400  | -0.73417000 | -3.64652800 |
| H                                                                  | 1.09736500  | -1.30271000 | -4.32996700 |
| C                                                                  | 0.74555200  | 0.75535000  | -3.89528600 |
| H                                                                  | 1.81640000  | 0.95886600  | -3.99142900 |

|    |             |             |             |
|----|-------------|-------------|-------------|
| H  | 0.36598100  | 1.37451200  | -3.07567700 |
| C  | -0.02318200 | 1.04571700  | -5.18988900 |
| H  | -0.18717900 | 2.11590700  | -5.35509600 |
| H  | 0.55302500  | 0.66793200  | -6.04451200 |
| C  | -1.33711200 | 0.25573500  | -5.04663700 |
| H  | -2.11674900 | 0.89317800  | -4.61432000 |
| H  | -1.71208100 | -0.08728400 | -6.01620700 |
| C  | -1.02247800 | -0.92452900 | -4.08972400 |
| H  | -1.15321200 | -1.89354600 | -4.58341300 |
| H  | -1.68847200 | -0.91254300 | -3.22012700 |
| C  | 0.43665600  | -3.19662500 | -2.25847900 |
| H  | -0.64367500 | -3.19591400 | -2.45042700 |
| C  | 0.70155000  | -4.16883300 | -1.06680100 |
| H  | 1.24971800  | -3.70198000 | -0.24690600 |
| H  | -0.25469100 | -4.49182400 | -0.64459600 |
| C  | 1.47217400  | -5.36479100 | -1.65991700 |
| H  | 2.55290100  | -5.21759700 | -1.53343300 |
| H  | 1.21587900  | -6.31197700 | -1.17465500 |
| C  | 1.13214700  | -5.33882500 | -3.15228400 |
| H  | 0.12752700  | -5.75038800 | -3.31637300 |
| H  | 1.83250800  | -5.91342400 | -3.76783400 |
| C  | 1.13844900  | -3.84187200 | -3.47459100 |
| H  | 0.63686600  | -3.60625100 | -4.41860300 |
| H  | 2.17788500  | -3.49716800 | -3.55911300 |
| C  | 2.63796700  | -1.24030700 | -1.87413100 |
| H  | 3.03065800  | -1.55722000 | -2.84805600 |
| C  | 3.08417400  | 0.23482800  | -1.61558300 |
| H  | 3.55903600  | 0.64354200  | -2.51371900 |
| H  | 2.24217400  | 0.88822100  | -1.37016100 |
| C  | 4.08908700  | 0.18084700  | -0.44902600 |
| H  | 4.88966800  | 0.92193600  | -0.54947200 |
| H  | 3.56998000  | 0.39017700  | 0.49459100  |
| C  | 4.60607900  | -1.26067900 | -0.45132000 |
| H  | 5.06401300  | -1.55664700 | 0.49859600  |
| H  | 5.35919600  | -1.38983400 | -1.23986900 |
| C  | 3.35096700  | -2.07326900 | -0.78462100 |
| H  | 2.73608900  | -2.15614400 | 0.11904300  |
| H  | 3.56905800  | -3.09174500 | -1.12174400 |
| P  | -1.07682100 | -0.30781900 | 2.04521900  |
| P  | 0.78187800  | -1.39707600 | -1.94111800 |
| Fe | -0.24789200 | -0.59236400 | -0.05544100 |
| H  | 1.18335800  | -0.25338900 | 0.56427500  |
| H  | -2.51419800 | 1.79086100  | -0.93435500 |
| H  | -0.42631400 | -2.04969000 | 0.28799500  |
| H  | 1.06711500  | -1.09475400 | 0.63815000  |
| C  | 0.40537700  | 4.76366900  | -0.03632200 |
| C  | 1.71469300  | 3.96133400  | 0.29918500  |
| C  | 0.61546900  | 5.98590400  | -0.91508100 |
| H  | -0.34137300 | 6.48799200  | -1.08587500 |
| H  | 1.28960800  | 6.69816700  | -0.42775300 |
| H  | 1.03441200  | 5.71521800  | -1.88650500 |
| C  | 2.74008700  | 3.98425200  | -0.83541400 |
| H  | 3.21485300  | 4.96564600  | -0.92965100 |
| H  | 3.51714500  | 3.24452200  | -0.62272900 |
| H  | 2.28309400  | 3.72595100  | -1.79621400 |
| C  | -0.39703600 | 5.13553900  | 1.21083900  |
| H  | 0.09178700  | 5.93650300  | 1.77357500  |
| H  | -1.38781600 | 5.48400600  | 0.90571400  |

|                                                                    |             |             |             |
|--------------------------------------------------------------------|-------------|-------------|-------------|
| H                                                                  | −0.52775700 | 4.27599200  | 1.87560500  |
| C                                                                  | 2.37573100  | 4.33522600  | 1.61654500  |
| H                                                                  | 3.26922000  | 3.72118300  | 1.76498800  |
| H                                                                  | 2.68239000  | 5.38642500  | 1.61228600  |
| H                                                                  | 1.70724400  | 4.16808600  | 2.46393500  |
| O                                                                  | −0.37240100 | 3.78716800  | −0.77213100 |
| O                                                                  | 1.22248700  | 2.60925000  | 0.39656000  |
| B                                                                  | 0.08428500  | 2.55227900  | −0.37701200 |
| O                                                                  | −0.46631200 | 1.36781900  | −0.69883400 |
| C                                                                  | −1.80006200 | 1.04099900  | −1.31720600 |
| H                                                                  | −1.64708700 | 1.21870700  | −2.39710900 |
| O                                                                  | −2.03882400 | −0.21605700 | −0.96540300 |
| <b>TS<sub>9,10</sub>-Fe</b>                                        |             |             |             |
| $G_{\text{solv}} = -3723.526300; E_{\text{solv}} = -3724.49582350$ |             |             |             |
| C                                                                  | −2.42593700 | −1.47632900 | 2.79858600  |
| H                                                                  | −2.52632500 | −1.26328700 | 3.86968300  |
| C                                                                  | −2.19622600 | −3.01329400 | 2.62305900  |
| H                                                                  | −1.23121200 | −3.26324500 | 2.17686800  |
| H                                                                  | −2.22032600 | −3.49814300 | 3.60571300  |
| C                                                                  | −3.35993200 | −3.51764900 | 1.75580200  |
| H                                                                  | −3.09925500 | −3.42994900 | 0.69215000  |
| H                                                                  | −3.60643800 | −4.56632000 | 1.95225900  |
| C                                                                  | −4.49851900 | −2.54911100 | 2.07551600  |
| H                                                                  | −4.92245400 | −2.78009700 | 3.06211100  |
| H                                                                  | −5.31299500 | −2.58139200 | 1.34432900  |
| C                                                                  | −3.78202900 | −1.19557000 | 2.10050200  |
| H                                                                  | −4.35569700 | −0.41774000 | 2.61380300  |
| H                                                                  | −3.61516500 | −0.86543800 | 1.07024700  |
| C                                                                  | 0.32128900  | −0.80187500 | 3.40328000  |
| H                                                                  | −0.12285900 | −0.64434100 | 4.39433500  |
| C                                                                  | 0.91172700  | −2.22680700 | 3.39183700  |
| H                                                                  | 0.28725200  | −2.94511700 | 3.93140500  |
| H                                                                  | 1.03171000  | −2.58338700 | 2.36115800  |
| C                                                                  | 2.29500400  | −2.04662600 | 4.02355300  |
| H                                                                  | 2.19542800  | −1.91429400 | 5.10935200  |
| H                                                                  | 2.95653400  | −2.90279300 | 3.85204900  |
| C                                                                  | 2.79738900  | −0.75615900 | 3.37132700  |
| H                                                                  | 3.17529200  | −0.98829700 | 2.36867700  |
| H                                                                  | 3.61220000  | −0.28001300 | 3.92677200  |
| C                                                                  | 1.54974000  | 0.14535900  | 3.25167700  |
| H                                                                  | 1.55125500  | 0.67824100  | 2.29707400  |
| H                                                                  | 1.53243600  | 0.90585200  | 4.04134900  |
| C                                                                  | −1.43204300 | 1.30396300  | 2.65886200  |
| H                                                                  | −0.48559400 | 1.82748900  | 2.48401800  |
| C                                                                  | −1.85554700 | 1.52580200  | 4.14285700  |
| H                                                                  | −1.84493100 | 0.61460900  | 4.74831800  |
| H                                                                  | −1.15423700 | 2.22203600  | 4.61840800  |
| C                                                                  | −3.25755400 | 2.15087700  | 4.08903900  |
| H                                                                  | −4.01924100 | 1.36167900  | 4.04829500  |
| H                                                                  | −3.47572100 | 2.77161500  | 4.96435100  |
| C                                                                  | −3.25562600 | 2.93184900  | 2.77379600  |
| H                                                                  | −2.68690400 | 3.86358700  | 2.89885300  |
| H                                                                  | −4.25940300 | 3.20239200  | 2.42877300  |
| C                                                                  | −2.52787500 | 1.99412400  | 1.80286800  |
| H                                                                  | −2.09118100 | 2.52250100  | 0.95251800  |
| H                                                                  | −3.23436400 | 1.26580700  | 1.39575200  |
| C                                                                  | 0.54123800  | −0.81420500 | −3.56568900 |
| H                                                                  | 1.25819800  | −1.32314600 | −4.22424200 |

|    |             |             |             |
|----|-------------|-------------|-------------|
| C  | 0.73982700  | 0.70066000  | −3.76342200 |
| H  | 1.79740500  | 0.97085100  | −3.83836800 |
| H  | 0.32264800  | 1.26688600  | −2.92309800 |
| C  | −0.02940900 | 0.98584300  | −5.05853100 |
| H  | −0.25742200 | 2.04842200  | −5.19235600 |
| H  | 0.57467200  | 0.66880200  | −5.91859500 |
| C  | −1.29298600 | 0.11483800  | −4.95392800 |
| H  | −2.09728000 | 0.67767000  | −4.46494800 |
| H  | −1.67179800 | −0.18321800 | −5.93648400 |
| C  | −0.89043900 | −1.10680800 | −4.08744900 |
| H  | −0.90353400 | −2.03569500 | −4.66730000 |
| H  | −1.59607100 | −1.24795000 | −3.26011400 |
| C  | 0.63472500  | −3.28635500 | −2.18787100 |
| H  | −0.41963500 | −3.35841400 | −2.48619600 |
| C  | 0.84222300  | −4.24243300 | −0.96959200 |
| H  | 1.34103000  | −3.75701200 | −0.12709800 |
| H  | −0.13043100 | −4.58567100 | −0.60045700 |
| C  | 1.67378500  | −5.42977500 | −1.49810900 |
| H  | 2.73544900  | −5.27575600 | −1.26743700 |
| H  | 1.37895300  | −6.38192400 | −1.04606400 |
| C  | 1.47732800  | −5.39674500 | −3.01651000 |
| H  | 0.50411800  | −5.83054700 | −3.28177200 |
| H  | 2.24853400  | −5.94912000 | −3.56329000 |
| C  | 1.47946000  | −3.89754800 | −3.32665700 |
| H  | 1.07483900  | −3.66441900 | −4.31667900 |
| H  | 2.51131100  | −3.52493900 | −3.29600600 |
| C  | 2.68175400  | −1.21818600 | −1.71343600 |
| H  | 3.11184400  | −1.50357700 | −2.68175400 |
| C  | 3.07359900  | 0.26015900  | −1.41289000 |
| H  | 3.51124800  | 0.71985900  | −2.30551200 |
| H  | 2.20897700  | 0.85848500  | −1.12365800 |
| C  | 4.09850100  | 0.20449300  | −0.26245700 |
| H  | 4.89354800  | 0.95031700  | −0.37186900 |
| H  | 3.58406100  | 0.40621500  | 0.68365800  |
| C  | 4.62909100  | −1.23206000 | −0.27628500 |
| H  | 5.08484600  | −1.53147600 | 0.67391400  |
| H  | 5.38745100  | −1.35109800 | −1.06207000 |
| C  | 3.38200400  | −2.05081100 | −0.61943500 |
| H  | 2.74675100  | −2.11452100 | 0.27120700  |
| H  | 3.60750000  | −3.06996600 | −0.95166800 |
| P  | −1.01439700 | −0.44057700 | 2.15809000  |
| P  | 0.84410900  | −1.46250700 | −1.84997800 |
| Fe | −0.35409200 | −0.80238000 | −0.00964500 |
| H  | 0.98741800  | −0.95853500 | 0.63207900  |
| H  | −2.77837000 | 1.67768600  | −1.17116200 |
| H  | −0.97228300 | −2.27769500 | 0.04248100  |
| H  | −0.22960400 | −2.30170800 | 0.44558500  |
| C  | 0.63094000  | 4.53679500  | 0.15830500  |
| C  | 1.91702400  | 3.78469400  | 0.65410300  |
| C  | 0.90063900  | 5.73659900  | −0.73990800 |
| H  | −0.04605500 | 6.20792100  | −1.02272800 |
| H  | 1.50914900  | 6.48523700  | −0.22050300 |
| H  | 1.41581000  | 5.44165700  | −1.65685300 |
| C  | 3.04616800  | 3.80049400  | −0.37984400 |
| H  | 3.49492300  | 4.79451300  | −0.47656100 |
| H  | 3.82388500  | 3.10075800  | −0.06199100 |
| H  | 2.68829100  | 3.48170700  | −1.36396600 |
| C  | −0.28953000 | 4.94713200  | 1.31192300  |

|                                                                    |             |             |             |
|--------------------------------------------------------------------|-------------|-------------|-------------|
| H                                                                  | 0.12338900  | 5.78418100  | 1.88411000  |
| H                                                                  | −1.25675600 | 5.25365100  | 0.90227900  |
| H                                                                  | −0.46209700 | 4.11166100  | 1.99709900  |
| C                                                                  | 2.44750400  | 4.24225700  | 2.00629600  |
| H                                                                  | 3.33873500  | 3.66242700  | 2.26637300  |
| H                                                                  | 2.72639500  | 5.30148800  | 1.98135000  |
| H                                                                  | 1.70958500  | 4.09257300  | 2.79796200  |
| O                                                                  | −0.04291300 | 3.52370900  | −0.59599100 |
| O                                                                  | 1.45348300  | 2.43671400  | 0.77068500  |
| B                                                                  | 0.36338300  | 2.27047000  | −0.09734500 |
| O                                                                  | −0.21619700 | 1.14030500  | −0.41439400 |
| C                                                                  | −2.20504700 | 0.76744300  | −1.40897700 |
| H                                                                  | −1.55819000 | 0.82082600  | −2.28726300 |
| O                                                                  | −2.41156500 | −0.28195500 | −0.80762900 |
| <b>10Fe</b>                                                        |             |             |             |
| $G_{\text{solv}} = -3723.533359; E_{\text{solv}} = -3724.50567104$ |             |             |             |
| C                                                                  | −2.53180100 | −1.34010600 | 2.60731300  |
| H                                                                  | −2.67675500 | −1.09511700 | 3.66628800  |
| C                                                                  | −2.28794000 | −2.88051300 | 2.49074100  |
| H                                                                  | −1.31820400 | −3.13584400 | 2.05858900  |
| H                                                                  | −2.31283900 | −3.32899200 | 3.49020900  |
| C                                                                  | −3.44040800 | −3.42884300 | 1.63363300  |
| H                                                                  | −3.16319300 | −3.39862900 | 0.57105400  |
| H                                                                  | −3.69177800 | −4.46525100 | 1.88140600  |
| C                                                                  | −4.58371500 | −2.44516200 | 1.88318600  |
| H                                                                  | −5.02665200 | −2.62419000 | 2.87212700  |
| H                                                                  | −5.38480500 | −2.51314200 | 1.13969700  |
| C                                                                  | −3.86460500 | −1.09328200 | 1.85686300  |
| H                                                                  | −4.45050700 | −0.28612200 | 2.30720600  |
| H                                                                  | −3.66868900 | −0.82478200 | 0.81308300  |
| C                                                                  | 0.18491700  | −0.63395000 | 3.29568200  |
| H                                                                  | −0.29864400 | −0.45414800 | 4.26428900  |
| C                                                                  | 0.77825400  | −2.05929600 | 3.33158500  |
| H                                                                  | 0.15745000  | −2.75778800 | 3.90099300  |
| H                                                                  | 0.88895800  | −2.45274400 | 2.31402600  |
| C                                                                  | 2.17006500  | −1.86297600 | 3.94012200  |
| H                                                                  | 2.08772200  | −1.70278100 | 5.02375000  |
| H                                                                  | 2.82851800  | −2.72371800 | 3.77967100  |
| C                                                                  | 2.65978400  | −0.58858200 | 3.24935200  |
| H                                                                  | 2.99585300  | −0.83645400 | 2.23495300  |
| H                                                                  | 3.49697900  | −0.10878700 | 3.76740400  |
| C                                                                  | 1.41444900  | 0.31602000  | 3.16384600  |
| H                                                                  | 1.41604600  | 0.88067300  | 2.22879700  |
| H                                                                  | 1.40400600  | 1.04815500  | 3.98054000  |
| C                                                                  | −1.55811200 | 1.43935300  | 2.42520400  |
| H                                                                  | −0.61159600 | 1.96900500  | 2.27256700  |
| C                                                                  | −2.04422100 | 1.70394400  | 3.88249100  |
| H                                                                  | −2.08820200 | 0.80415300  | 4.50345000  |
| H                                                                  | −1.34664200 | 2.38923500  | 4.37843900  |
| C                                                                  | −3.42652500 | 2.36286000  | 3.74979200  |
| H                                                                  | −4.20681300 | 1.59166700  | 3.71042200  |
| H                                                                  | −3.66178000 | 3.02284400  | 4.59116000  |
| C                                                                  | −3.35756800 | 3.09095600  | 2.40594900  |
| H                                                                  | −2.76960500 | 4.01234300  | 2.51307300  |
| H                                                                  | −4.34143600 | 3.37119900  | 2.01430800  |
| C                                                                  | −2.61897500 | 2.09610400  | 1.50302100  |
| H                                                                  | −2.15163000 | 2.56850500  | 0.63543000  |
| H                                                                  | −3.33398600 | 1.35797500  | 1.12616500  |

|    |             |             |             |
|----|-------------|-------------|-------------|
| C  | 0.39036000  | −0.66326300 | −3.66773900 |
| H  | 1.12144900  | −1.08327800 | −4.37199500 |
| C  | 0.46066400  | 0.87364200  | −3.77005100 |
| H  | 1.48713600  | 1.23594200  | −3.88121100 |
| H  | 0.04631300  | 1.33247800  | −2.86622600 |
| C  | −0.41551100 | 1.18662000  | −4.98581400 |
| H  | −0.70194300 | 2.24199400  | −5.04567200 |
| H  | 0.12106200  | 0.93366500  | −5.91032600 |
| C  | −1.61652200 | 0.25100300  | −4.80273600 |
| H  | −2.33733700 | 0.72095600  | −4.12008400 |
| H  | −2.15144000 | 0.05031200  | −5.73637200 |
| C  | −1.03714100 | −1.03341200 | −4.16495800 |
| H  | −0.98306000 | −1.84878900 | −4.89425000 |
| H  | −1.67749800 | −1.38507600 | −3.34928800 |
| C  | 0.59427600  | −3.18014000 | −2.36285800 |
| H  | −0.46459900 | −3.26349600 | −2.64017700 |
| C  | 0.83759800  | −4.15358100 | −1.16606100 |
| H  | 1.35921500  | −3.67940600 | −0.33112000 |
| H  | −0.12355800 | −4.50380500 | −0.77394300 |
| C  | 1.65609300  | −5.33074900 | −1.73770600 |
| H  | 2.72286100  | −5.18217500 | −1.52762700 |
| H  | 1.37080100  | −6.29213500 | −1.29919500 |
| C  | 1.42722100  | −5.26715900 | −3.25120100 |
| H  | 0.44942200  | −5.69772500 | −3.50481100 |
| H  | 2.18783900  | −5.80680600 | −3.82497800 |
| C  | 1.42004900  | −3.76163700 | −3.52976400 |
| H  | 0.99721700  | −3.50573200 | −4.50665800 |
| H  | 2.45150500  | −3.38791000 | −3.50850100 |
| C  | 2.62794400  | −1.10718200 | −1.92243000 |
| H  | 3.02644200  | −1.39812000 | −2.90255300 |
| C  | 3.03186200  | 0.37135100  | −1.64314600 |
| H  | 3.44086800  | 0.82401400  | −2.55324000 |
| H  | 2.17675700  | 0.97093900  | −1.33078500 |
| C  | 4.09216600  | 0.31951500  | −0.52441400 |
| H  | 4.88428500  | 1.06327900  | −0.66368700 |
| H  | 3.60729800  | 0.52757500  | 0.43626600  |
| C  | 4.61892400  | −1.11823900 | −0.54580700 |
| H  | 5.10262400  | −1.41340100 | 0.39179000  |
| H  | 5.35269400  | −1.24397100 | −1.35374400 |
| C  | 3.35980500  | −1.93514000 | −0.84568000 |
| H  | 2.75069900  | −1.99105300 | 0.06377200  |
| H  | 3.57252400  | −2.95696900 | −1.17842900 |
| P  | −1.10248500 | −0.31236400 | 1.98947600  |
| P  | 0.78979900  | −1.36215000 | −1.99336800 |
| Fe | −0.38565400 | −0.71233300 | −0.14531400 |
| H  | 0.94993500  | −0.87800200 | 0.52782500  |
| H  | −3.69357200 | 0.70644600  | −1.94538000 |
| H  | −0.99651300 | −2.19549200 | −0.07374500 |
| H  | −0.24678900 | −2.20285100 | 0.32277600  |
| C  | 0.67510700  | 4.59488000  | −0.01321400 |
| C  | 1.92828300  | 3.85925100  | 0.58333700  |
| C  | 1.00125000  | 5.77196500  | −0.92339600 |
| H  | 0.07428100  | 6.23078700  | −1.28243400 |
| H  | 1.57137100  | 6.53775700  | −0.38563900 |
| H  | 1.57752900  | 5.45463400  | −1.79540600 |
| C  | 3.12693100  | 3.86361900  | −0.36955000 |
| H  | 3.57041500  | 4.86057100  | −0.46233000 |
| H  | 3.88849800  | 3.18391100  | 0.02210300  |

|                                                                       |             |             |             |
|-----------------------------------------------------------------------|-------------|-------------|-------------|
| H                                                                     | 2.84301100  | 3.51286000  | −1.36675500 |
| C                                                                     | −0.31534900 | 5.03662700  | 1.06956100  |
| H                                                                     | 0.06157200  | 5.88705300  | 1.64709500  |
| H                                                                     | −1.25397200 | 5.33364800  | 0.59163200  |
| H                                                                     | −0.53364700 | 4.21805400  | 1.76189900  |
| C                                                                     | 2.36358600  | 4.34873400  | 1.95914100  |
| H                                                                     | 3.23986000  | 3.78215400  | 2.28994700  |
| H                                                                     | 2.63519900  | 5.40996900  | 1.93246300  |
| H                                                                     | 1.57522700  | 4.20733800  | 2.70240500  |
| O                                                                     | 0.04999900  | 3.56389700  | −0.77881200 |
| O                                                                     | 1.46678100  | 2.51256000  | 0.69609100  |
| B                                                                     | 0.41940800  | 2.31468800  | −0.22487200 |
| O                                                                     | −0.15803500 | 1.19202600  | −0.54225600 |
| C                                                                     | −2.66797100 | 0.65022500  | −1.54884700 |
| H                                                                     | −2.01453200 | 1.53213100  | −1.55972100 |
| O                                                                     | −2.26783400 | −0.40333200 | −1.08333000 |
| <b>11<sub>re</sub></b>                                                |             |             |             |
| $G_{\text{solv}} = -3609.081715$ ; $E_{\text{solv}} = -3610.01807364$ |             |             |             |
| C                                                                     | −2.04542100 | −1.78670900 | 2.92627600  |
| H                                                                     | −2.26698500 | −1.50205500 | 3.96181800  |
| C                                                                     | −1.42225700 | −3.21933900 | 2.93164700  |
| H                                                                     | −0.45378100 | −3.25864700 | 2.42431500  |
| H                                                                     | −1.25425000 | −3.54328200 | 3.96417100  |
| C                                                                     | −2.45533900 | −4.13140400 | 2.24073600  |
| H                                                                     | −2.21846600 | −4.22259400 | 1.17272600  |
| H                                                                     | −2.46817700 | −5.14262200 | 2.65942500  |
| C                                                                     | −3.78584100 | −3.39138500 | 2.40023200  |
| H                                                                     | −4.17067800 | −3.51914800 | 3.42063800  |
| H                                                                     | −4.55893000 | −3.73620100 | 1.70577300  |
| C                                                                     | −3.38414300 | −1.93233500 | 2.16875800  |
| H                                                                     | −4.13396100 | −1.21235400 | 2.51224100  |
| H                                                                     | −3.23902100 | −1.76908400 | 1.09304600  |
| C                                                                     | 0.29623400  | −0.25108900 | 3.61336800  |
| H                                                                     | −0.30457300 | −0.08519700 | 4.51884700  |
| C                                                                     | 1.25231400  | −1.42708000 | 3.88618400  |
| H                                                                     | 0.77539300  | −2.23911400 | 4.44386500  |
| H                                                                     | 1.62037600  | −1.83779900 | 2.93782000  |
| C                                                                     | 2.40647000  | −0.77172500 | 4.64982700  |
| H                                                                     | 2.09708800  | −0.56377500 | 5.68287000  |
| H                                                                     | 3.30143500  | −1.40126000 | 4.69250700  |
| C                                                                     | 2.63154000  | 0.53909300  | 3.88621600  |
| H                                                                     | 3.27526500  | 0.35348500  | 3.01886800  |
| H                                                                     | 3.12148200  | 1.30557700  | 4.49551600  |
| C                                                                     | 1.22881400  | 0.97424900  | 3.39947200  |
| H                                                                     | 1.28005400  | 1.26888300  | 2.34988800  |
| H                                                                     | 0.85347700  | 1.83760900  | 3.96074900  |
| C                                                                     | −1.83610100 | 1.10179900  | 2.28436700  |
| H                                                                     | −1.03971600 | 1.84572500  | 2.16131800  |
| C                                                                     | −2.62880800 | 1.45068900  | 3.57372100  |
| H                                                                     | −2.86107500 | 0.56834100  | 4.17909700  |
| H                                                                     | −2.03848300 | 2.11891200  | 4.21029300  |
| C                                                                     | −3.92953800 | 2.13723300  | 3.08983400  |
| H                                                                     | −4.76617400 | 1.42988900  | 3.14494400  |
| H                                                                     | −4.19970700 | 3.00266300  | 3.70327100  |
| C                                                                     | −3.66968900 | 2.50119100  | 1.62155600  |
| H                                                                     | −3.09591900 | 3.43510600  | 1.55670400  |
| H                                                                     | −4.59210300 | 2.63862300  | 1.04740900  |
| C                                                                     | −2.81078900 | 1.34042500  | 1.11418100  |

|    |             |             |             |
|----|-------------|-------------|-------------|
| H  | -2.26975900 | 1.56476800  | 0.19162600  |
| H  | -3.44643400 | 0.46616500  | 0.93255500  |
| C  | 0.62258800  | -0.41614200 | -3.23901200 |
| H  | 0.90812400  | -0.97552100 | -4.13796400 |
| C  | 1.41282000  | 0.91357800  | -3.23950400 |
| H  | 2.39035400  | 0.80888100  | -3.72194000 |
| H  | 1.58526600  | 1.26139300  | -2.21891400 |
| C  | 0.48285800  | 1.89464100  | -3.96109400 |
| H  | 0.74707400  | 2.94254600  | -3.77941700 |
| H  | 0.51969400  | 1.72382900  | -5.04582400 |
| C  | -0.89678700 | 1.52557800  | -3.40949800 |
| H  | -0.99811600 | 1.93695900  | -2.39936000 |
| H  | -1.72212200 | 1.91199700  | -4.01695400 |
| C  | -0.87990000 | -0.01320400 | -3.34578900 |
| H  | -1.31915500 | -0.44773600 | -4.25128300 |
| H  | -1.46890000 | -0.37695800 | -2.49479600 |
| C  | 0.28591300  | -3.13475900 | -2.48903400 |
| H  | -0.73838100 | -2.87558500 | -2.79031900 |
| C  | 0.19661600  | -4.32503600 | -1.48329900 |
| H  | 0.74092100  | -4.13645100 | -0.55448000 |
| H  | -0.84952900 | -4.48853500 | -1.20229600 |
| C  | 0.75573900  | -5.55443800 | -2.22862700 |
| H  | 1.81103500  | -5.70385700 | -1.96855200 |
| H  | 0.22562600  | -6.47691600 | -1.97181600 |
| C  | 0.64463500  | -5.19175200 | -3.71280300 |
| H  | -0.38854800 | -5.32871500 | -4.05830000 |
| H  | 1.29270300  | -5.79748100 | -4.35460600 |
| C  | 1.00522200  | -3.70318600 | -3.73280100 |
| H  | 0.69911300  | -3.20374800 | -4.65727900 |
| H  | 2.09305500  | -3.59273200 | -3.64377400 |
| C  | 2.76550000  | -1.69692100 | -1.73130800 |
| H  | 3.12268300  | -1.76533000 | -2.76722400 |
| C  | 3.46202900  | -0.48746600 | -1.03296400 |
| H  | 3.96496900  | 0.13637900  | -1.77934600 |
| H  | 2.75156600  | 0.15409300  | -0.50718100 |
| C  | 4.47739900  | -1.09787700 | -0.04232600 |
| H  | 5.40956400  | -0.52601100 | 0.00854700  |
| H  | 4.04347400  | -1.10931700 | 0.96475900  |
| C  | 4.67788100  | -2.53897700 | -0.51992300 |
| H  | 5.08187800  | -3.19898300 | 0.25502300  |
| H  | 5.36560600  | -2.56695200 | -1.37595400 |
| C  | 3.26883100  | -2.93763300 | -0.96479400 |
| H  | 2.65235900  | -3.10683300 | -0.07363300 |
| H  | 3.24162200  | -3.84777100 | -1.57280500 |
| P  | -0.90822500 | -0.50072000 | 2.22475500  |
| P  | 0.92069500  | -1.53265600 | -1.78820100 |
| Fe | -0.05831600 | -0.95034800 | 0.17077400  |
| H  | 0.89242000  | -1.91461700 | 0.81535500  |
| H  | -1.22707100 | -1.97024000 | -0.11020800 |
| H  | -0.58522200 | -2.41254100 | 0.29790900  |
| C  | 0.63027200  | 4.37299100  | 0.17434300  |
| C  | 2.12923800  | 3.90513000  | 0.13962100  |
| C  | 0.30833500  | 5.55355900  | -0.73112700 |
| H  | -0.75057100 | 5.81443200  | -0.63665800 |
| H  | 0.90076600  | 6.43234300  | -0.45324900 |
| H  | 0.50298500  | 5.31762300  | -1.77974700 |
| C  | 2.77726700  | 4.08618800  | -1.23568300 |
| H  | 2.98012700  | 5.13942100  | -1.45564600 |

|                                                                    |             |             |             |
|--------------------------------------------------------------------|-------------|-------------|-------------|
| H                                                                  | 3.72591800  | 3.54109400  | −1.25213100 |
| H                                                                  | 2.14395500  | 3.68033200  | −2.03031000 |
| C                                                                  | 0.13618500  | 4.65559600  | 1.59671300  |
| H                                                                  | 0.57165000  | 5.57306800  | 2.00536300  |
| H                                                                  | −0.95153900 | 4.77113800  | 1.57677000  |
| H                                                                  | 0.37693200  | 3.82756200  | 2.27159600  |
| C                                                                  | 3.01426300  | 4.52139300  | 1.21505900  |
| H                                                                  | 4.03863300  | 4.15162400  | 1.10577500  |
| H                                                                  | 3.03570300  | 5.61325700  | 1.12705000  |
| H                                                                  | 2.66913000  | 4.25576500  | 2.21700000  |
| O                                                                  | −0.06479500 | 3.21334000  | −0.29845900 |
| O                                                                  | 2.01387400  | 2.49947700  | 0.38092300  |
| B                                                                  | 0.72758500  | 2.09311800  | −0.00498000 |
| O                                                                  | 0.32769300  | 0.85048700  | −0.07573500 |
| <b>12<sub>Fe</sub></b>                                             |             |             |             |
| $G_{\text{solv}} = -4020.719808; E_{\text{solv}} = -4021.84656114$ |             |             |             |
| C                                                                  | −1.30993500 | −1.97807200 | 2.95071300  |
| H                                                                  | −1.56751100 | −1.75207400 | 3.99178400  |
| C                                                                  | 0.02260100  | −2.78968800 | 2.96254900  |
| H                                                                  | 0.78768800  | −2.34329200 | 2.32390500  |
| H                                                                  | 0.42384100  | −2.81996000 | 3.98151900  |
| C                                                                  | −0.34484100 | −4.20757300 | 2.48704100  |
| H                                                                  | −0.19277500 | −4.28636100 | 1.40278900  |
| H                                                                  | 0.26764600  | −4.98245900 | 2.95906200  |
| C                                                                  | −1.83796400 | −4.34053000 | 2.79582300  |
| H                                                                  | −1.98772600 | −4.52567500 | 3.86788600  |
| H                                                                  | −2.32397700 | −5.15302300 | 2.24539600  |
| C                                                                  | −2.38105100 | −2.95876600 | 2.42041000  |
| H                                                                  | −3.36977400 | −2.75190900 | 2.84204300  |
| H                                                                  | −2.47344400 | −2.89869300 | 1.32980000  |
| C                                                                  | −0.27475900 | 0.64802800  | 3.34743200  |
| H                                                                  | −0.69570900 | 0.38345800  | 4.33010300  |
| C                                                                  | 1.23710700  | 0.37123200  | 3.36324000  |
| H                                                                  | 1.48584600  | −0.60470200 | 3.78979500  |
| H                                                                  | 1.61563500  | 0.39471100  | 2.33672900  |
| C                                                                  | 1.83521500  | 1.53365300  | 4.17947600  |
| H                                                                  | 2.00141500  | 1.23076700  | 5.21941900  |
| H                                                                  | 2.80619000  | 1.83311200  | 3.77412700  |
| C                                                                  | 0.79532400  | 2.68139600  | 4.11291400  |
| H                                                                  | 1.23017700  | 3.61528100  | 3.74063500  |
| H                                                                  | 0.40232400  | 2.89560700  | 5.11358700  |
| C                                                                  | −0.33950100 | 2.17785700  | 3.20097300  |
| H                                                                  | −0.16523800 | 2.45938200  | 2.15898600  |
| H                                                                  | −1.31434200 | 2.58954800  | 3.48196300  |
| C                                                                  | −2.92952800 | 0.38397400  | 2.31497700  |
| H                                                                  | −2.76800100 | 1.43931500  | 2.07601600  |
| C                                                                  | −3.60816600 | 0.27964300  | 3.70923300  |
| H                                                                  | −3.15942900 | −0.48226600 | 4.35422500  |
| H                                                                  | −3.51033200 | 1.23209100  | 4.24224500  |
| C                                                                  | −5.09269600 | −0.05074100 | 3.42631900  |
| H                                                                  | −5.26902300 | −1.12492700 | 3.56530200  |
| H                                                                  | −5.77730100 | 0.47735800  | 4.09778700  |
| C                                                                  | −5.30312500 | 0.30812700  | 1.94994100  |
| H                                                                  | −5.44563200 | 1.39197500  | 1.84320900  |
| H                                                                  | −6.17551800 | −0.18745600 | 1.51007000  |
| C                                                                  | −3.98039700 | −0.10214900 | 1.29694400  |
| H                                                                  | −3.81362500 | 0.35606100  | 0.31859300  |
| H                                                                  | −3.95838900 | −1.19001500 | 1.16491900  |

|    |             |             |             |
|----|-------------|-------------|-------------|
| C  | 0.82652700  | −0.26246400 | −3.49399500 |
| H  | 1.41890200  | −0.89390700 | −4.17207900 |
| C  | 1.55998800  | 1.08057600  | −3.36052600 |
| H  | 2.63208700  | 0.96037500  | −3.17306300 |
| H  | 1.12556900  | 1.67306400  | −2.55280800 |
| C  | 1.25977300  | 1.76307000  | −4.69887500 |
| H  | 1.43653900  | 2.84357200  | −4.66624200 |
| H  | 1.90680100  | 1.34438200  | −5.48132000 |
| C  | −0.21531700 | 1.41432500  | −4.97576200 |
| H  | −0.85848400 | 2.20865800  | −4.58943800 |
| H  | −0.41626900 | 1.31177800  | −6.04756600 |
| C  | −0.49964100 | 0.10452600  | −4.19777300 |
| H  | −0.83495600 | −0.70419400 | −4.85617800 |
| H  | −1.28371100 | 0.28018200  | −3.45458400 |
| C  | −0.30919900 | −2.71360500 | −2.66856100 |
| H  | −1.25035400 | −2.26701000 | −3.01410300 |
| C  | −0.67509500 | −3.87442200 | −1.69194500 |
| H  | −0.10801100 | −3.83801800 | −0.75980700 |
| H  | −1.73313300 | −3.80730100 | −1.41666800 |
| C  | −0.38586500 | −5.18409100 | −2.45581900 |
| H  | 0.59381300  | −5.57994200 | −2.15986000 |
| H  | −1.12617000 | −5.96297800 | −2.24798800 |
| C  | −0.33943000 | −4.77407100 | −3.93054000 |
| H  | −1.35789900 | −4.66378100 | −4.32584400 |
| H  | 0.18687400  | −5.49680400 | −4.56255000 |
| C  | 0.34773800  | −3.40730300 | −3.88120100 |
| H  | 0.22849100  | −2.83459500 | −4.80603600 |
| H  | 1.42348800  | −3.55073300 | −3.71707700 |
| C  | 2.33072500  | −1.86404300 | −1.66210100 |
| H  | 2.74046500  | −2.13722900 | −2.64234100 |
| C  | 3.23517800  | −0.76488200 | −1.02989100 |
| H  | 3.97227700  | −0.41998100 | −1.76372300 |
| H  | 2.66389000  | 0.10828200  | −0.70932300 |
| C  | 3.92681500  | −1.42505700 | 0.17862800  |
| H  | 4.94907400  | −1.06144600 | 0.33013300  |
| H  | 3.35694800  | −1.20268400 | 1.08867300  |
| C  | 3.85926300  | −2.92718600 | −0.11247000 |
| H  | 4.00134700  | −3.54611900 | 0.77995400  |
| H  | 4.63026600  | −3.20966000 | −0.84218000 |
| C  | 2.46517400  | −3.08444200 | −0.72725100 |
| H  | 1.72216600  | −3.02953700 | 0.07631800  |
| H  | 2.32556100  | −4.03296400 | −1.25727600 |
| P  | −1.23095400 | −0.32282100 | 2.08999300  |
| P  | 0.59901800  | −1.25369900 | −1.94060900 |
| Fe | −0.43117600 | −0.47371700 | −0.04406100 |
| H  | 0.74464400  | −1.12149600 | 0.65196200  |
| H  | −1.49138300 | −1.61114700 | −0.23260300 |
| H  | −0.77559100 | −1.97498300 | 0.11656300  |
| C  | 2.38121800  | 4.29152800  | −0.11013100 |
| C  | 3.29942900  | 3.13647100  | 0.43327300  |
| C  | 3.00905100  | 5.14332500  | −1.20319000 |
| H  | 2.30052300  | 5.91425400  | −1.52056800 |
| H  | 3.91178800  | 5.64245900  | −0.83495200 |
| H  | 3.26950500  | 4.54544500  | −2.07908200 |
| C  | 4.26325200  | 2.59224900  | −0.62149800 |
| H  | 5.05362400  | 3.31361400  | −0.85041300 |
| H  | 4.72943800  | 1.67970600  | −0.23976100 |
| H  | 3.73979700  | 2.34179700  | −1.54883300 |

|                                                                       |             |            |             |
|-----------------------------------------------------------------------|-------------|------------|-------------|
| C                                                                     | 1.81800000  | 5.18534500 | 0.99531100  |
| H                                                                     | 2.59922200  | 5.79412500 | 1.46036200  |
| H                                                                     | 1.07073200  | 5.85800000 | 0.56518400  |
| H                                                                     | 1.32510500  | 4.59274800 | 1.77165600  |
| C                                                                     | 4.05732300  | 3.47637200 | 1.70714200  |
| H                                                                     | 4.65743500  | 2.61677700 | 2.02049800  |
| H                                                                     | 4.73614000  | 4.31885100 | 1.53651200  |
| H                                                                     | 3.37885000  | 3.73488100 | 2.52261400  |
| O                                                                     | 1.27301400  | 3.56368500 | −0.67237700 |
| O                                                                     | 2.34524000  | 2.09372500 | 0.72031600  |
| B                                                                     | 1.22958200  | 2.33662700 | −0.04968500 |
| O                                                                     | 0.21863300  | 1.45433300 | −0.17331800 |
| C                                                                     | −2.42813700 | 3.04800900 | −2.00962100 |
| C                                                                     | −2.61105100 | 3.46566400 | −0.50632000 |
| H                                                                     | −1.61700500 | 0.39065700 | −0.79579700 |
| C                                                                     | −2.23844600 | 4.22388100 | −2.96156800 |
| H                                                                     | −2.20525700 | 3.87285600 | −3.99770800 |
| H                                                                     | −3.07021700 | 4.93271900 | −2.87748100 |
| H                                                                     | −1.30412500 | 4.74979300 | −2.75293800 |
| C                                                                     | −1.82095300 | 4.72696700 | −0.14332100 |
| H                                                                     | −2.26685600 | 5.62959600 | −0.57595900 |
| H                                                                     | −1.81638500 | 4.83681400 | 0.94668900  |
| H                                                                     | −0.78596600 | 4.63982600 | −0.48077600 |
| C                                                                     | −3.56467000 | 2.15179100 | −2.52004600 |
| H                                                                     | −4.50572000 | 2.70157500 | −2.62829000 |
| H                                                                     | −3.28495800 | 1.75722800 | −3.50214300 |
| H                                                                     | −3.73402400 | 1.30175800 | −1.85133500 |
| C                                                                     | −4.06274900 | 3.62400400 | −0.06460600 |
| H                                                                     | −4.09602700 | 3.91313900 | 0.99126900  |
| H                                                                     | −4.56954700 | 4.40531900 | −0.64267500 |
| H                                                                     | −4.61870200 | 2.69015400 | −0.17633200 |
| O                                                                     | −1.23334700 | 2.27676600 | −1.97319200 |
| O                                                                     | −2.03986300 | 2.36541900 | 0.19017100  |
| B                                                                     | −1.15954800 | 1.64890900 | −0.68982500 |
| <b>1Fe-HBpin</b>                                                      |             |            |             |
| $G_{\text{solv}} = -3534.999725$ ; $E_{\text{solv}} = -3535.95692874$ |             |            |             |
| C                                                                     | 16.00303700 | 3.74368300 | 6.95059200  |
| H                                                                     | 16.94480200 | 4.14085800 | 7.34874000  |
| C                                                                     | 16.33271400 | 2.90696600 | 5.67609600  |
| H                                                                     | 15.74853900 | 3.21958000 | 4.80854200  |
| H                                                                     | 17.38835700 | 3.03452000 | 5.41461400  |
| C                                                                     | 16.04027900 | 1.43927000 | 6.04637300  |
| H                                                                     | 15.01899900 | 1.17229600 | 5.74098000  |
| H                                                                     | 16.72079000 | 0.73714100 | 5.55422900  |
| C                                                                     | 16.12734000 | 1.40493200 | 7.57412000  |
| H                                                                     | 17.17759900 | 1.40733300 | 7.89462100  |
| H                                                                     | 15.64449200 | 0.52716600 | 8.01610000  |
| C                                                                     | 15.45329100 | 2.72074400 | 7.97095100  |
| H                                                                     | 15.65009100 | 3.01781600 | 9.00581400  |
| H                                                                     | 14.36734400 | 2.60886000 | 7.86435400  |
| C                                                                     | 16.06318300 | 6.42590300 | 5.87275900  |
| H                                                                     | 16.90486500 | 6.54105000 | 6.56616300  |
| C                                                                     | 16.61279700 | 5.99272400 | 4.48995800  |
| H                                                                     | 17.57950100 | 5.48527100 | 4.57077400  |
| H                                                                     | 15.91421500 | 5.30461400 | 4.00351900  |
| C                                                                     | 16.67441900 | 7.28600400 | 3.66784300  |
| H                                                                     | 17.56755000 | 7.86884400 | 3.93128300  |
| H                                                                     | 16.70449300 | 7.09687700 | 2.58938000  |

|   |             |             |             |
|---|-------------|-------------|-------------|
| C | 15.41366900 | 8.02538900  | 4.11880400  |
| H | 14.53365500 | 7.54395800  | 3.67355400  |
| H | 15.39928700 | 9.08385600  | 3.83681700  |
| C | 15.39353100 | 7.81339200  | 5.63899800  |
| H | 14.38095100 | 7.86697300  | 6.04412400  |
| H | 15.98340600 | 8.59281900  | 6.13739500  |
| C | 14.76856700 | 5.96507300  | 8.37558100  |
| H | 14.42444700 | 6.98221800  | 8.16589900  |
| C | 16.03520200 | 6.07128900  | 9.24783400  |
| H | 16.62369300 | 5.14557800  | 9.22941600  |
| H | 16.69369300 | 6.88770500  | 8.93231100  |
| C | 15.46477000 | 6.27318900  | 10.65588100 |
| H | 16.20468800 | 6.11232900  | 11.44724600 |
| H | 15.08604800 | 7.29906000  | 10.75647500 |
| C | 14.30103700 | 5.27532700  | 10.70421900 |
| H | 13.56962200 | 5.51256700  | 11.48366900 |
| H | 14.69216800 | 4.27365300  | 10.92448400 |
| C | 13.68970400 | 5.31008000  | 9.28607800  |
| H | 12.78290000 | 5.91981600  | 9.24844200  |
| H | 13.40096200 | 4.31013400  | 8.95050000  |
| C | 9.94024100  | 3.42711800  | 4.16622700  |
| H | 9.62211900  | 2.87718300  | 3.27312900  |
| C | 8.88510500  | 4.51952100  | 4.43910100  |
| H | 8.46564900  | 4.92420200  | 3.51190600  |
| H | 9.32706400  | 5.34635600  | 4.99865800  |
| C | 7.84711300  | 3.81350300  | 5.31646500  |
| H | 7.17774900  | 4.51409600  | 5.82926100  |
| H | 7.22455900  | 3.13844600  | 4.71326200  |
| C | 8.72254200  | 3.00767500  | 6.27915000  |
| H | 9.13515300  | 3.68308700  | 7.03946600  |
| H | 8.18117700  | 2.21111200  | 6.80006900  |
| C | 9.86589900  | 2.47024100  | 5.39562500  |
| H | 9.65846400  | 1.44674000  | 5.06279200  |
| H | 10.80569600 | 2.44207500  | 5.95820700  |
| C | 12.35944000 | 2.32020200  | 3.26585100  |
| H | 12.29685600 | 1.70429200  | 4.17246800  |
| C | 13.84191600 | 2.29436000  | 2.77703200  |
| H | 14.28160100 | 3.28859200  | 2.69402000  |
| H | 14.45484800 | 1.74849600  | 3.50202700  |
| C | 13.83216700 | 1.55325200  | 1.42817900  |
| H | 13.72664700 | 2.27105600  | 0.60401200  |
| H | 14.75376600 | 0.98928100  | 1.25217400  |
| C | 12.58351900 | 0.67199100  | 1.49307200  |
| H | 12.77347300 | −0.20303100 | 2.12933400  |
| H | 12.25580900 | 0.30743200  | 0.51386400  |
| C | 11.55645700 | 1.59044400  | 2.16159200  |
| H | 10.69931500 | 1.04258700  | 2.56522100  |
| H | 11.17127300 | 2.29822200  | 1.41652700  |
| C | 11.56120500 | 4.99653600  | 2.30961200  |
| H | 10.98022200 | 4.40483400  | 1.59217900  |
| C | 10.83703900 | 6.36425500  | 2.52075800  |
| H | 9.90112600  | 6.37013500  | 1.95043600  |
| H | 10.58472700 | 6.55731700  | 3.56349700  |
| C | 11.80009000 | 7.43834200  | 1.98461200  |
| H | 11.27453300 | 8.29988100  | 1.55876900  |
| H | 12.42989000 | 7.80749600  | 2.80413200  |
| C | 12.67342700 | 6.69800200  | 0.97036300  |
| H | 13.60304400 | 7.22608800  | 0.73185100  |

|                                                                       |             |             |             |
|-----------------------------------------------------------------------|-------------|-------------|-------------|
| H                                                                     | 12.12192100 | 6.54880100  | 0.03213600  |
| C                                                                     | 12.92061000 | 5.35485700  | 1.66287800  |
| H                                                                     | 13.68144800 | 5.49018400  | 2.44007500  |
| H                                                                     | 13.27269300 | 4.57607200  | 0.97863400  |
| P                                                                     | 14.90052200 | 5.21943900  | 6.67848000  |
| P                                                                     | 11.69543400 | 3.97228500  | 3.85414300  |
| Fe                                                                    | 13.02177600 | 4.74856300  | 5.51917500  |
| H                                                                     | 14.02877800 | 4.61645700  | 4.40232400  |
| H                                                                     | 12.81599200 | 6.26518700  | 5.08990700  |
| H                                                                     | 12.95884800 | 3.30019400  | 6.19088500  |
| H                                                                     | 13.54691600 | 3.25345700  | 5.56919000  |
| C                                                                     | 10.16253000 | 7.77477400  | 6.61210800  |
| C                                                                     | 11.47854600 | 8.41488400  | 7.16004100  |
| H                                                                     | 11.94179600 | 5.08305900  | 6.66104400  |
| C                                                                     | 9.25281300  | 8.72428300  | 5.84395300  |
| H                                                                     | 8.36036000  | 8.18837700  | 5.50486300  |
| H                                                                     | 8.92776700  | 9.55558000  | 6.47943000  |
| H                                                                     | 9.75506100  | 9.13095100  | 4.96317300  |
| C                                                                     | 12.04300300 | 9.48971500  | 6.22522600  |
| H                                                                     | 11.42511600 | 10.39366800 | 6.22460900  |
| H                                                                     | 13.04666900 | 9.76612400  | 6.56221000  |
| H                                                                     | 12.12048200 | 9.11906200  | 5.19831100  |
| C                                                                     | 9.36049800  | 7.04322300  | 7.69447600  |
| H                                                                     | 8.87980000  | 7.74045700  | 8.38869300  |
| H                                                                     | 8.57899200  | 6.44752000  | 7.21216800  |
| H                                                                     | 9.99828700  | 6.36335900  | 8.26811900  |
| C                                                                     | 11.38572200 | 8.95989900  | 8.57930300  |
| H                                                                     | 12.35252400 | 9.37751700  | 8.87880100  |
| H                                                                     | 10.63747400 | 9.75781000  | 8.64389200  |
| H                                                                     | 11.12367100 | 8.17537900  | 9.29291000  |
| O                                                                     | 10.67382500 | 6.79691900  | 5.70956800  |
| O                                                                     | 12.37129200 | 7.30114300  | 7.15345600  |
| B                                                                     | 11.94854900 | 6.36725800  | 6.16663700  |
| <b>Os-1cyp</b>                                                        |             |             |             |
| $G_{\text{solv}} = -1951.770462$ ; $E_{\text{solv}} = -1952.55525331$ |             |             |             |
| C                                                                     | 11.12287100 | 4.83807100  | 8.06758500  |
| H                                                                     | 11.14911300 | 5.16570100  | 9.11411300  |
| C                                                                     | 11.08483100 | 3.27973200  | 8.03492900  |
| H                                                                     | 11.85699200 | 2.86054600  | 7.38528100  |
| H                                                                     | 11.25077200 | 2.88506900  | 9.04286900  |
| C                                                                     | 9.68110600  | 2.90289500  | 7.52017400  |
| H                                                                     | 9.72632200  | 2.72644900  | 6.43834600  |
| H                                                                     | 9.29125100  | 1.99395400  | 7.98991400  |
| C                                                                     | 8.82240100  | 4.14083300  | 7.79178700  |
| H                                                                     | 8.54051500  | 4.18643500  | 8.85237000  |
| H                                                                     | 7.90179400  | 4.16615400  | 7.19951200  |
| C                                                                     | 9.78028400  | 5.28512400  | 7.45183400  |
| H                                                                     | 9.45133700  | 6.25999500  | 7.82763500  |
| H                                                                     | 9.87080300  | 5.35446400  | 6.36040000  |
| C                                                                     | 13.96548300 | 5.22378700  | 8.45568500  |
| H                                                                     | 13.61413200 | 5.62599900  | 9.41389400  |
| C                                                                     | 14.30884300 | 3.73003400  | 8.65783400  |
| H                                                                     | 13.67856200 | 3.26065900  | 9.41918800  |
| H                                                                     | 14.17298000 | 3.17609000  | 7.72255500  |
| C                                                                     | 15.79699800 | 3.73341600  | 9.02135400  |
| H                                                                     | 15.93436000 | 4.04533200  | 10.06555200 |
| H                                                                     | 16.26386100 | 2.75001500  | 8.90232800  |
| C                                                                     | 16.36683900 | 4.79083300  | 8.07396400  |

---

|   |             |             |             |
|---|-------------|-------------|-------------|
| H | 16.44040100 | 4.36538300  | 7.06502700  |
| H | 17.36285400 | 5.14426100  | 8.36019400  |
| C | 15.31368700 | 5.91319400  | 8.08128400  |
| H | 15.27380800 | 6.41827600  | 7.11148400  |
| H | 15.56083800 | 6.67074600  | 8.83367600  |
| C | 12.42959900 | 7.40567800  | 7.45756800  |
| H | 13.43538000 | 7.77503600  | 7.22181200  |
| C | 12.06048500 | 7.92945200  | 8.85897000  |
| H | 11.22933500 | 7.35711800  | 9.29069600  |
| H | 12.89871500 | 7.87872800  | 9.56129500  |
| C | 11.59511600 | 9.36187800  | 8.58137800  |
| H | 11.04953900 | 9.80759600  | 9.41966700  |
| H | 12.46517800 | 9.99840100  | 8.37358700  |
| C | 10.73826200 | 9.20756500  | 7.31866400  |
| H | 10.62191300 | 10.14512700 | 6.76624700  |
| H | 9.73247800  | 8.87349700  | 7.60290900  |
| C | 11.44078800 | 8.11136300  | 6.48458300  |
| H | 11.99361500 | 8.53413000  | 5.64079200  |
| H | 10.70814600 | 7.42226600  | 6.05729600  |
| C | 13.34794400 | 4.62902700  | 1.44946100  |
| H | 13.87149700 | 4.07803000  | 0.65815800  |
| C | 13.64573800 | 6.13189200  | 1.27045500  |
| H | 14.66241200 | 6.31463000  | 0.91012400  |
| H | 13.53008000 | 6.65836200  | 2.22597300  |
| C | 12.56356000 | 6.60458000  | 0.29567600  |
| H | 12.45511800 | 7.69399400  | 0.27537200  |
| H | 12.80247300 | 6.27314800  | −0.72374100 |
| C | 11.31230700 | 5.88560100  | 0.80736100  |
| H | 10.92179500 | 6.42161000  | 1.68201600  |
| H | 10.50730500 | 5.83716700  | 0.06715100  |
| C | 11.81054800 | 4.48861200  | 1.23369900  |
| H | 11.61111900 | 3.74336300  | 0.45622300  |
| H | 11.29210200 | 4.15225200  | 2.13826700  |
| C | 13.43899100 | 2.12394700  | 2.80190700  |
| H | 12.35830300 | 2.18133300  | 2.62200800  |
| C | 13.65269900 | 1.17317100  | 4.01582500  |
| H | 14.38301100 | 1.56091100  | 4.72836000  |
| H | 12.71564500 | 1.07042900  | 4.57018500  |
| C | 14.12201200 | −0.17341300 | 3.41752700  |
| H | 15.20545000 | −0.28413600 | 3.55095100  |
| H | 13.64941900 | −1.03449400 | 3.90021800  |
| C | 13.80434700 | −0.08296900 | 1.91954400  |
| H | 12.74636100 | −0.31590400 | 1.74048400  |
| H | 14.40316200 | −0.76828400 | 1.31052300  |
| C | 14.06754000 | 1.39145400  | 1.60073200  |
| H | 13.64117300 | 1.70855500  | 0.64322600  |
| H | 15.15091800 | 1.56212000  | 1.55617500  |
| C | 15.75492600 | 3.93720900  | 2.90371600  |
| H | 15.99143900 | 3.54412900  | 1.90779600  |
| C | 16.36522300 | 5.36656900  | 3.03369400  |
| H | 16.81529500 | 5.66099200  | 2.07922700  |
| H | 15.61500500 | 6.11780400  | 3.29024600  |
| C | 17.43796700 | 5.26686100  | 4.13295600  |
| H | 18.28239700 | 5.94167400  | 3.95867000  |
| H | 16.99308500 | 5.53303300  | 5.09970400  |
| C | 17.83623700 | 3.78913800  | 4.14756700  |
| H | 18.34672300 | 3.48947400  | 5.06914100  |
| H | 18.50577800 | 3.56672300  | 3.30584100  |

---

|                                                                    |             |             |             |
|--------------------------------------------------------------------|-------------|-------------|-------------|
| C                                                                  | 16.49177100 | 3.08044600  | 3.95893000  |
| H                                                                  | 15.94814800 | 3.10122200  | 4.91057800  |
| H                                                                  | 16.58752800 | 2.03401900  | 3.64986400  |
| P                                                                  | 12.60923000 | 5.57071100  | 7.23531100  |
| P                                                                  | 13.90704600 | 3.90201900  | 3.06221300  |
| Os                                                                 | 13.04959400 | 4.87503800  | 5.03127600  |
| H                                                                  | 14.60482700 | 4.87917700  | 5.51332200  |
| H                                                                  | 13.79300900 | 6.34616400  | 4.72355800  |
| H                                                                  | 11.96554300 | 5.58828200  | 3.90092900  |
| H                                                                  | 11.69514700 | 5.89792600  | 4.75596500  |
| H                                                                  | 11.78111100 | 3.77587800  | 5.03979300  |
| H                                                                  | 13.49251600 | 3.46113200  | 5.70719400  |
| <b>1Os</b>                                                         |             |             |             |
| $G_{\text{solv}} = -1950.572520; E_{\text{solv}} = -1951.33787136$ |             |             |             |
| C                                                                  | 11.09172400 | 4.89447200  | 8.02305800  |
| H                                                                  | 11.00289000 | 5.31308700  | 9.03378600  |
| C                                                                  | 11.02102500 | 3.34026100  | 8.11434400  |
| H                                                                  | 11.83360500 | 2.86086100  | 7.56195900  |
| H                                                                  | 11.10323200 | 3.02369600  | 9.15922400  |
| C                                                                  | 9.65485000  | 2.93967100  | 7.51765000  |
| H                                                                  | 9.78968600  | 2.63779200  | 6.47211600  |
| H                                                                  | 9.19370300  | 2.10081200  | 8.04913400  |
| C                                                                  | 8.81504500  | 4.21949000  | 7.56540900  |
| H                                                                  | 8.42375500  | 4.38499800  | 8.57825300  |
| H                                                                  | 7.96390600  | 4.20108100  | 6.87660700  |
| C                                                                  | 9.84143000  | 5.29877700  | 7.21449600  |
| H                                                                  | 9.50398600  | 6.31617300  | 7.43883600  |
| H                                                                  | 10.05752100 | 5.24035300  | 6.14006400  |
| C                                                                  | 13.88506700 | 5.29656500  | 8.68611600  |
| H                                                                  | 13.44391500 | 5.77895500  | 9.56743000  |
| C                                                                  | 14.17832200 | 3.81602900  | 9.02595600  |
| H                                                                  | 13.46825300 | 3.40801400  | 9.75156000  |
| H                                                                  | 14.12031800 | 3.20117500  | 8.12006200  |
| C                                                                  | 15.62458100 | 3.82451700  | 9.52967300  |
| H                                                                  | 15.66714700 | 4.20852300  | 10.55790100 |
| H                                                                  | 16.08082900 | 2.82896600  | 9.52530800  |
| C                                                                  | 16.30358400 | 4.80462000  | 8.57078000  |
| H                                                                  | 16.46884400 | 4.30825500  | 7.60595300  |
| H                                                                  | 17.27258100 | 5.16625200  | 8.93013100  |
| C                                                                  | 15.27619300 | 5.93696300  | 8.39312500  |
| H                                                                  | 15.33919600 | 6.36098400  | 7.38653800  |
| H                                                                  | 15.46524800 | 6.74817600  | 9.10541800  |
| C                                                                  | 12.48974300 | 7.36990600  | 7.27399500  |
| H                                                                  | 13.52470200 | 7.72457800  | 7.19720800  |
| C                                                                  | 11.85043800 | 8.07228800  | 8.48597400  |
| H                                                                  | 10.95628200 | 7.53926100  | 8.83157000  |
| H                                                                  | 12.53886500 | 8.14901400  | 9.33402000  |
| C                                                                  | 11.43853000 | 9.43442100  | 7.91753800  |
| H                                                                  | 10.73069300 | 9.97111900  | 8.55774200  |
| H                                                                  | 12.32643500 | 10.06873100 | 7.79703100  |
| C                                                                  | 10.85266300 | 9.07815600  | 6.54482200  |
| H                                                                  | 10.83765100 | 9.92758400  | 5.85518400  |
| H                                                                  | 9.81522600  | 8.74406800  | 6.66885900  |
| C                                                                  | 11.72376300 | 7.90925300  | 6.02889400  |
| H                                                                  | 12.43983000 | 8.24637300  | 5.27144700  |
| H                                                                  | 11.10155600 | 7.14288800  | 5.55560900  |
| C                                                                  | 13.22819300 | 4.74799200  | 1.69821900  |
| H                                                                  | 13.63616800 | 4.31842300  | 0.77541900  |

|                                                                       |             |             |            |
|-----------------------------------------------------------------------|-------------|-------------|------------|
| C                                                                     | 13.50691300 | 6.27379700  | 1.71309400 |
| H                                                                     | 14.40524100 | 6.53758500  | 1.14741300 |
| H                                                                     | 13.65993100 | 6.62593300  | 2.74262200 |
| C                                                                     | 12.22838100 | 6.90928200  | 1.16006300 |
| H                                                                     | 12.14559300 | 7.97425300  | 1.40145500 |
| H                                                                     | 12.19569500 | 6.80954500  | 0.06698600 |
| C                                                                     | 11.13227000 | 6.05422900  | 1.79617500 |
| H                                                                     | 11.02277800 | 6.32956800  | 2.85485000 |
| H                                                                     | 10.15192300 | 6.17387900  | 1.32397300 |
| C                                                                     | 11.67190900 | 4.61863400  | 1.68640100 |
| H                                                                     | 11.34913300 | 4.16132900  | 0.74447400 |
| H                                                                     | 11.28741600 | 3.99420600  | 2.49815800 |
| C                                                                     | 13.50176000 | 2.09673600  | 2.77689900 |
| H                                                                     | 12.40837900 | 2.16023500  | 2.73545700 |
| C                                                                     | 13.85605400 | 1.06565000  | 3.89081900 |
| H                                                                     | 14.62752800 | 1.42839200  | 4.57349100 |
| H                                                                     | 12.97050400 | 0.87610000  | 4.50478600 |
| C                                                                     | 14.31476400 | −0.20941300 | 3.14885700 |
| H                                                                     | 15.41105700 | −0.25843900 | 3.13010900 |
| H                                                                     | 13.95897800 | −1.12608300 | 3.62941100 |
| C                                                                     | 13.79444800 | −0.04376200 | 1.71592600 |
| H                                                                     | 12.72804800 | −0.30085300 | 1.66803400 |
| H                                                                     | 14.32162200 | −0.67241600 | 0.99065200 |
| C                                                                     | 13.97760900 | 1.45525300  | 1.45906000 |
| H                                                                     | 13.41688400 | 1.81764600  | 0.59093400 |
| H                                                                     | 15.04025700 | 1.65901700  | 1.27649100 |
| C                                                                     | 15.81533200 | 3.89887000  | 2.71937600 |
| H                                                                     | 15.91826100 | 3.57148100  | 1.67783100 |
| C                                                                     | 16.46986800 | 5.30626600  | 2.86136700 |
| H                                                                     | 16.76043700 | 5.67921700  | 1.87301100 |
| H                                                                     | 15.79067600 | 6.03798800  | 3.30388700 |
| C                                                                     | 17.70599700 | 5.10813900  | 3.76010200 |
| H                                                                     | 18.53382000 | 5.77166900  | 3.48969200 |
| H                                                                     | 17.43458000 | 5.32110800  | 4.80148800 |
| C                                                                     | 18.04879600 | 3.62288900  | 3.62235000 |
| H                                                                     | 18.68911800 | 3.25064500  | 4.42907300 |
| H                                                                     | 18.56447200 | 3.43589600  | 2.67069300 |
| C                                                                     | 16.66572900 | 2.96772900  | 3.61210600 |
| H                                                                     | 16.27069100 | 2.96470800  | 4.63555300 |
| H                                                                     | 16.67218400 | 1.93377000  | 3.25097000 |
| P                                                                     | 12.67921100 | 5.52258600  | 7.29557700 |
| P                                                                     | 14.00481600 | 3.84852300  | 3.13005400 |
| Os                                                                    | 13.33008200 | 4.68565500  | 5.20967800 |
| H                                                                     | 14.69231400 | 4.19504000  | 5.86111400 |
| H                                                                     | 14.54581700 | 5.85201500  | 5.18414900 |
| H                                                                     | 11.83566500 | 3.91344900  | 4.99267600 |
| H                                                                     | 13.37639300 | 3.21540000  | 5.79460400 |
| <b>2Os</b>                                                            |             |             |            |
| $G_{\text{solv}} = -2139.105703$ ; $E_{\text{solv}} = -2139.88894656$ |             |             |            |
| C                                                                     | −2.07604400 | −0.03858800 | 3.01601700 |
| H                                                                     | −1.99135900 | 0.28575900  | 4.05988900 |
| C                                                                     | −2.04061100 | −1.59902600 | 2.97745000 |
| H                                                                     | −1.28662900 | −1.98465100 | 2.28572800 |
| H                                                                     | −1.79119800 | −1.98690800 | 3.97005200 |
| C                                                                     | −3.45675400 | −2.04381900 | 2.55752200 |
| H                                                                     | −3.48792000 | −2.21913600 | 1.47379000 |
| H                                                                     | −3.76563700 | −2.97335400 | 3.04566000 |
| C                                                                     | −4.35319000 | −0.85138000 | 2.89997400 |

|   |             |             |             |
|---|-------------|-------------|-------------|
| H | −4.55894100 | −0.82703300 | 3.97813900  |
| H | −5.31429300 | −0.86875900 | 2.37620400  |
| C | −3.48094300 | 0.34187500  | 2.50364900  |
| H | −3.82837500 | 1.29520100  | 2.91238000  |
| H | −3.48168500 | 0.43249300  | 1.40932200  |
| C | 0.74804000  | 0.53636900  | 3.24631400  |
| H | 0.43239500  | 0.99043500  | 4.19317500  |
| C | 1.15088800  | −0.92770700 | 3.53390900  |
| H | 0.57238400  | −1.36173800 | 4.35536200  |
| H | 0.99493800  | −1.55165300 | 2.64738900  |
| C | 2.65257100  | −0.84719100 | 3.82516100  |
| H | 2.82522500  | −0.45217900 | 4.83522600  |
| H | 3.14929100  | −1.82074900 | 3.75713700  |
| C | 3.13615100  | 0.15259500  | 2.77349600  |
| H | 3.16685600  | −0.34769700 | 1.79788300  |
| H | 4.13461300  | 0.55406900  | 2.97371200  |
| C | 2.04961900  | 1.24224000  | 2.75642600  |
| H | 1.94772200  | 1.68667500  | 1.76135400  |
| H | 2.30748700  | 2.05418700  | 3.44560500  |
| C | −0.95059200 | 2.59809800  | 2.26977300  |
| H | −0.00413500 | 3.01332700  | 1.90359100  |
| C | −1.17357900 | 3.12979500  | 3.70375800  |
| H | −1.82541000 | 2.46150300  | 4.28139200  |
| H | −0.23590000 | 3.23711000  | 4.25808700  |
| C | −1.89404000 | 4.46357800  | 3.48385200  |
| H | −2.37487200 | 4.84328500  | 4.39136500  |
| H | −1.17656000 | 5.22103800  | 3.14250600  |
| C | −2.88433200 | 4.13643000  | 2.36294200  |
| H | −3.27027600 | 5.02667300  | 1.85682000  |
| H | −3.74655000 | 3.60389600  | 2.78536200  |
| C | −2.09749200 | 3.21551000  | 1.41023400  |
| H | −1.65960300 | 3.78994000  | 0.58972100  |
| H | −2.73835500 | 2.46639800  | 0.94244700  |
| C | 0.04510900  | −0.33799100 | −3.73458800 |
| H | 0.43294900  | −1.02950100 | −4.49352800 |
| C | 0.58089700  | 1.06719700  | −4.07813800 |
| H | 1.60849600  | 1.03604300  | −4.45177600 |
| H | 0.56457300  | 1.72703600  | −3.20642400 |
| C | −0.42178500 | 1.57504100  | −5.11805800 |
| H | −0.35599300 | 2.65616600  | −5.27547800 |
| H | −0.23998200 | 1.08392100  | −6.08373900 |
| C | −1.77202100 | 1.13626400  | −4.54144600 |
| H | −2.08109800 | 1.84692400  | −3.76810500 |
| H | −2.56469000 | 1.09395700  | −5.29541800 |
| C | −1.50067800 | −0.23980200 | −3.89242100 |
| H | −1.86775600 | −1.05983500 | −4.51949400 |
| H | −2.01506300 | −0.31274200 | −2.92823200 |
| C | −0.03156900 | −2.79781700 | −2.30919900 |
| H | −1.09627700 | −2.67310300 | −2.55155500 |
| C | 0.06096700  | −3.70150200 | −1.04471800 |
| H | 0.80895000  | −3.34273400 | −0.33536300 |
| H | −0.89344200 | −3.69469100 | −0.50846600 |
| C | 0.42083200  | −5.11491500 | −1.56096400 |
| H | 1.47906100  | −5.32402000 | −1.36163600 |
| H | −0.16018400 | −5.90163600 | −1.07003600 |
| C | 0.19098200  | −5.06414900 | −3.07675500 |
| H | −0.87183000 | −5.21599300 | −3.30646900 |
| H | 0.76005200  | −5.82354300 | −3.62254600 |

|                                                                       |             |             |             |
|-----------------------------------------------------------------------|-------------|-------------|-------------|
| C                                                                     | 0.59675400  | −3.63355900 | −3.44108600 |
| H                                                                     | 0.25297300  | −3.32961700 | −4.43484700 |
| H                                                                     | 1.69114600  | −3.55407600 | −3.42719400 |
| C                                                                     | 2.39660200  | −1.12796500 | −2.21316600 |
| H                                                                     | 2.62632500  | −1.57119800 | −3.19020400 |
| C                                                                     | 3.10187300  | 0.25924800  | −2.11768100 |
| H                                                                     | 3.50306100  | 0.53625700  | −3.09762100 |
| H                                                                     | 2.42439500  | 1.05831000  | −1.80919800 |
| C                                                                     | 4.23627500  | 0.08723300  | −1.08723500 |
| H                                                                     | 5.13630300  | 0.64698700  | −1.36032200 |
| H                                                                     | 3.90246600  | 0.46167800  | −0.11286800 |
| C                                                                     | 4.47088000  | −1.42379800 | −1.00383700 |
| H                                                                     | 4.97800000  | −1.73020200 | −0.08278200 |
| H                                                                     | 5.08304900  | −1.76238500 | −1.85038900 |
| C                                                                     | 3.05467600  | −1.99412100 | −1.11756000 |
| H                                                                     | 2.53514300  | −1.85341800 | −0.16234100 |
| H                                                                     | 3.03133400  | −3.06238800 | −1.35961100 |
| P                                                                     | −0.68375100 | 0.76902500  | 2.09209300  |
| P                                                                     | 0.55267700  | −1.04443600 | −2.09971100 |
| Os                                                                    | −0.29651400 | −0.05471800 | −0.10916900 |
| H                                                                     | 0.32444800  | −1.34427900 | 0.64465900  |
| H                                                                     | 1.25361500  | 0.18808600  | 0.24373800  |
| H                                                                     | −1.69497600 | −1.08122400 | −0.59513900 |
| H                                                                     | −1.92422800 | −0.76740700 | 0.18174500  |
| C                                                                     | 0.05251700  | 1.86175200  | −0.73727000 |
| O                                                                     | −1.12732900 | 1.72851900  | −1.16778100 |
| O                                                                     | 0.88110900  | 2.75270800  | −0.73555900 |
| TS <sub>2,3-Os</sub>                                                  |             |             |             |
| $G_{\text{solv}} = -2139.090906$ ; $E_{\text{solv}} = -2139.87210141$ |             |             |             |
| C                                                                     | 10.89552200 | 5.17109100  | 7.73562700  |
| H                                                                     | 10.85475100 | 5.47734800  | 8.78718500  |
| C                                                                     | 11.00865800 | 3.61466100  | 7.69312700  |
| H                                                                     | 11.87013100 | 3.26140300  | 7.12121300  |
| H                                                                     | 11.13015000 | 3.23102600  | 8.71126700  |
| C                                                                     | 9.68701500  | 3.11222000  | 7.08025500  |
| H                                                                     | 9.80246400  | 2.98021800  | 5.99594500  |
| H                                                                     | 9.37287900  | 2.14910200  | 7.49473600  |
| C                                                                     | 8.69002300  | 4.24316300  | 7.34356400  |
| H                                                                     | 8.35903400  | 4.22105000  | 8.39017400  |
| H                                                                     | 7.79905400  | 4.19053600  | 6.70979100  |
| C                                                                     | 9.53236200  | 5.49435800  | 7.08315600  |
| H                                                                     | 9.08921100  | 6.41125900  | 7.48347300  |
| H                                                                     | 9.64715800  | 5.62851600  | 6.00007100  |
| C                                                                     | 13.68136500 | 5.85917000  | 8.21531500  |
| H                                                                     | 13.30890800 | 6.27001900  | 9.16133700  |
| C                                                                     | 14.10801000 | 4.39263600  | 8.45941200  |
| H                                                                     | 13.52530200 | 3.91902600  | 9.25579600  |
| H                                                                     | 13.97659300 | 3.79725500  | 7.54965000  |
| C                                                                     | 15.60602200 | 4.48166100  | 8.76890400  |
| H                                                                     | 15.76467200 | 4.83280200  | 9.79732000  |
| H                                                                     | 16.11628900 | 3.51841500  | 8.66187200  |
| C                                                                     | 16.08494000 | 5.53697700  | 7.77053800  |
| H                                                                     | 16.12930400 | 5.09105600  | 6.76877700  |
| H                                                                     | 17.07618400 | 5.94033900  | 8.00100900  |
| C                                                                     | 14.98572800 | 6.61165800  | 7.80585600  |
| H                                                                     | 14.90077900 | 7.12926700  | 6.84621300  |
| H                                                                     | 15.21875300 | 7.37245200  | 8.55957700  |
| C                                                                     | 11.90516800 | 7.89247100  | 7.28796500  |

|    |             |             |             |
|----|-------------|-------------|-------------|
| H  | 12.86391700 | 8.39456900  | 7.11670000  |
| C  | 11.42028600 | 8.28518500  | 8.70059300  |
| H  | 10.71199700 | 7.55045500  | 9.10334900  |
| H  | 12.24474300 | 8.37547100  | 9.41504900  |
| C  | 10.68201100 | 9.60673600  | 8.46473900  |
| H  | 10.04272200 | 9.89452200  | 9.30594200  |
| H  | 11.40804000 | 10.41374800 | 8.30308200  |
| C  | 9.90086500  | 9.33600600  | 7.17516300  |
| H  | 9.56477300  | 10.25060100 | 6.67707800  |
| H  | 9.00475400  | 8.74748100  | 7.41136300  |
| C  | 10.86831100 | 8.51255300  | 6.30147800  |
| H  | 11.39068400 | 9.15391400  | 5.58697600  |
| H  | 10.34266600 | 7.76214200  | 5.70586000  |
| C  | 12.89206600 | 4.91916600  | 1.16206400  |
| H  | 13.18999800 | 4.18454900  | 0.40244300  |
| C  | 13.45702500 | 6.29083700  | 0.74035800  |
| H  | 14.45672700 | 6.21296200  | 0.30245000  |
| H  | 13.50712000 | 6.96491900  | 1.60112800  |
| C  | 12.40501200 | 6.81180100  | −0.24264500 |
| H  | 12.50575200 | 7.88319300  | −0.44270700 |
| H  | 12.49084800 | 6.28158600  | −1.20103500 |
| C  | 11.08530000 | 6.45528900  | 0.44966600  |
| H  | 10.86971500 | 7.20510000  | 1.21816600  |
| H  | 10.23442200 | 6.42812200  | −0.23832100 |
| C  | 11.34451600 | 5.08786900  | 1.12202100  |
| H  | 10.89067400 | 4.26765700  | 0.55499900  |
| H  | 10.90658600 | 5.06801400  | 2.12595600  |
| C  | 12.73801700 | 2.56376200  | 2.75405900  |
| H  | 11.66865900 | 2.77522900  | 2.62218400  |
| C  | 12.89273300 | 1.71602300  | 4.05396400  |
| H  | 13.66236200 | 2.10397300  | 4.72316200  |
| H  | 11.95593400 | 1.74013000  | 4.62092200  |
| C  | 13.22110700 | 0.28246900  | 3.58490000  |
| H  | 14.30277900 | 0.10912000  | 3.64536500  |
| H  | 12.73633800 | −0.48181200 | 4.20007500  |
| C  | 12.78388800 | 0.23802900  | 2.11692800  |
| H  | 11.69647500 | 0.10299000  | 2.04862100  |
| H  | 13.25612000 | −0.57142100 | 1.55101100  |
| C  | 13.16731000 | 1.62906700  | 1.60427200  |
| H  | 12.68710300 | 1.88556100  | 0.65473400  |
| H  | 14.25264500 | 1.66685000  | 1.44811900  |
| C  | 15.30316800 | 4.02285100  | 2.52385000  |
| H  | 15.41163000 | 3.51508300  | 1.55850300  |
| C  | 16.11876500 | 5.35309600  | 2.47782700  |
| H  | 16.59974300 | 5.44820400  | 1.49826600  |
| H  | 15.50395700 | 6.24596200  | 2.61577900  |
| C  | 17.17703500 | 5.23022100  | 3.58534100  |
| H  | 18.08844900 | 5.79176400  | 3.35740500  |
| H  | 16.77061700 | 5.62251700  | 4.52624100  |
| C  | 17.40427500 | 3.72307800  | 3.71626300  |
| H  | 17.90524800 | 3.44068300  | 4.64799500  |
| H  | 18.01669100 | 3.35786800  | 2.88104300  |
| C  | 15.98084500 | 3.16557300  | 3.62076200  |
| H  | 15.48393600 | 3.32158100  | 4.58452700  |
| H  | 15.94135800 | 2.09511100  | 3.39221200  |
| P  | 12.31497200 | 6.10575300  | 6.98521600  |
| P  | 13.48604900 | 4.26499300  | 2.78718000  |
| Os | 12.87237800 | 5.42749400  | 4.76473000  |

|                                                                    |             |             |             |
|--------------------------------------------------------------------|-------------|-------------|-------------|
| H                                                                  | 13.76742500 | 4.33014700  | 5.52239800  |
| H                                                                  | 14.32634800 | 6.17487200  | 4.43635300  |
| H                                                                  | 11.39014700 | 4.62554300  | 4.53515800  |
| H                                                                  | 11.86003800 | 4.17633500  | 5.26514700  |
| C                                                                  | 13.41575400 | 7.49539900  | 4.48359300  |
| O                                                                  | 12.44231100 | 7.41859200  | 3.70146700  |
| O                                                                  | 14.12741400 | 8.37378200  | 4.92329100  |
| <b>3Os</b>                                                         |             |             |             |
| $G_{\text{solv}} = -2139.107002; E_{\text{solv}} = -2139.88964865$ |             |             |             |
| C                                                                  | -1.53778700 | -0.46988900 | 3.13067400  |
| H                                                                  | -1.68699100 | -0.04376500 | 4.12987200  |
| C                                                                  | -0.76692000 | -1.81897500 | 3.28291800  |
| H                                                                  | 0.15072600  | -1.85252100 | 2.69184200  |
| H                                                                  | -0.48093200 | -1.96029800 | 4.33060600  |
| C                                                                  | -1.75115900 | -2.91671500 | 2.83706500  |
| H                                                                  | -1.60501700 | -3.13276300 | 1.77079800  |
| H                                                                  | -1.61150800 | -3.85319600 | 3.38649300  |
| C                                                                  | -3.13376100 | -2.29272600 | 3.03885900  |
| H                                                                  | -3.40324200 | -2.30048500 | 4.10345100  |
| H                                                                  | -3.92603400 | -2.81090900 | 2.48879400  |
| C                                                                  | -2.91878200 | -0.85626900 | 2.55583800  |
| H                                                                  | -3.70691000 | -0.16414800 | 2.86950600  |
| H                                                                  | -2.88945700 | -0.85615300 | 1.46030000  |
| C                                                                  | 0.69960000  | 1.34752700  | 3.32689200  |
| H                                                                  | 0.19991900  | 1.56665600  | 4.27826300  |
| C                                                                  | 1.78971200  | 0.27211800  | 3.56676500  |
| H                                                                  | 1.55196700  | -0.37681900 | 4.41488100  |
| H                                                                  | 1.89429400  | -0.36643100 | 2.68150200  |
| C                                                                  | 3.08583500  | 1.06733800  | 3.75439300  |
| H                                                                  | 3.13128300  | 1.49107800  | 4.76630000  |
| H                                                                  | 3.98134500  | 0.45438400  | 3.60808400  |
| C                                                                  | 2.94157500  | 2.18618100  | 2.72203900  |
| H                                                                  | 3.12630800  | 1.78412900  | 1.71693300  |
| H                                                                  | 3.63612500  | 3.01785900  | 2.87363500  |
| C                                                                  | 1.47236600  | 2.61583500  | 2.85082800  |
| H                                                                  | 1.09876300  | 3.03500300  | 1.91273400  |
| H                                                                  | 1.37231500  | 3.40562700  | 3.60356600  |
| C                                                                  | -1.74180900 | 2.30425000  | 2.14269700  |
| H                                                                  | -1.08025100 | 3.11057700  | 1.80457700  |
| C                                                                  | -2.35613200 | 2.74222900  | 3.48641300  |
| H                                                                  | -2.74454400 | 1.88174000  | 4.04634100  |
| H                                                                  | -1.63429300 | 3.25786700  | 4.12817600  |
| C                                                                  | -3.52712400 | 3.63119900  | 3.05667100  |
| H                                                                  | -4.24009200 | 3.82196100  | 3.86544000  |
| H                                                                  | -3.14661100 | 4.60087000  | 2.71036300  |
| C                                                                  | -4.13809500 | 2.85450800  | 1.88394500  |
| H                                                                  | -4.75673500 | 3.48175500  | 1.23468700  |
| H                                                                  | -4.78417300 | 2.05790600  | 2.27485600  |
| C                                                                  | -2.93155100 | 2.24242000  | 1.13831000  |
| H                                                                  | -2.67513800 | 2.81510900  | 0.24319400  |
| H                                                                  | -3.14720700 | 1.22699700  | 0.79859800  |
| C                                                                  | 0.39670700  | 0.12388700  | -3.64798200 |
| H                                                                  | 0.47918200  | -0.57670900 | -4.48819600 |
| C                                                                  | 1.52447300  | 1.16258700  | -3.80773400 |
| H                                                                  | 2.44735200  | 0.71505400  | -4.19040500 |
| H                                                                  | 1.76531500  | 1.64612800  | -2.85624300 |
| C                                                                  | 0.91490800  | 2.20049600  | -4.75459000 |
| H                                                                  | 1.46845300  | 3.14467300  | -4.75838700 |

|                                                                      |             |             |             |
|----------------------------------------------------------------------|-------------|-------------|-------------|
| H                                                                    | 0.90718800  | 1.81061400  | −5.78161400 |
| C                                                                    | −0.51625700 | 2.34870500  | −4.22687000 |
| H                                                                    | −0.51170300 | 3.00859700  | −3.35314500 |
| H                                                                    | −1.20165100 | 2.77614600  | −4.96575400 |
| C                                                                    | −0.93059500 | 0.92579600  | −3.78997600 |
| H                                                                    | −1.57697900 | 0.44948800  | −4.53554100 |
| H                                                                    | −1.49057700 | 0.96180200  | −2.84969400 |
| C                                                                    | −0.83459200 | −2.18227900 | −2.54844200 |
| H                                                                    | −1.72401700 | −1.56894800 | −2.74406000 |
| C                                                                    | −1.20897100 | −3.20470500 | −1.43334300 |
| H                                                                    | −0.45124200 | −3.26989100 | −0.65031700 |
| H                                                                    | −2.13273500 | −2.88737000 | −0.93944500 |
| C                                                                    | −1.38474000 | −4.56405100 | −2.14626200 |
| H                                                                    | −0.48654700 | −5.17798400 | −2.00480700 |
| H                                                                    | −2.23139400 | −5.13656200 | −1.75499200 |
| C                                                                    | −1.53253400 | −4.21794400 | −3.63190900 |
| H                                                                    | −2.56025000 | −3.89667400 | −3.84629200 |
| H                                                                    | −1.30142900 | −5.05789300 | −4.29495300 |
| C                                                                    | −0.57639600 | −3.03505000 | −3.80776600 |
| H                                                                    | −0.75075600 | −2.48111400 | −4.73542600 |
| H                                                                    | 0.45708000  | −3.40409900 | −3.82965100 |
| C                                                                    | 2.08333700  | −1.76608500 | −2.24525300 |
| H                                                                    | 2.20508400  | −2.06600300 | −3.29304500 |
| C                                                                    | 3.28216800  | −0.85192700 | −1.84023400 |
| H                                                                    | 3.92365500  | −0.67771800 | −2.71018200 |
| H                                                                    | 2.96598900  | 0.13208300  | −1.48134700 |
| C                                                                    | 4.04685000  | −1.62230000 | −0.74846900 |
| H                                                                    | 5.12114700  | −1.41336400 | −0.76288000 |
| H                                                                    | 3.66639500  | −1.33797900 | 0.24137700  |
| C                                                                    | 3.70610000  | −3.08981900 | −1.01742000 |
| H                                                                    | 3.92052900  | −3.74684300 | −0.16827300 |
| H                                                                    | 4.27491300  | −3.45936700 | −1.88092900 |
| C                                                                    | 2.21378700  | −3.02195300 | −1.35309000 |
| H                                                                    | 1.65533100  | −2.88672700 | −0.41975000 |
| H                                                                    | 1.83003700  | −3.92251000 | −1.84363500 |
| P                                                                    | −0.63501400 | 0.81779000  | 2.14833200  |
| P                                                                    | 0.44543900  | −0.90750600 | −2.11062100 |
| Os                                                                   | 0.01761200  | 0.11048600  | −0.01358400 |
| H                                                                    | 1.04105600  | −0.94168700 | 0.62333700  |
| H                                                                    | 1.51583000  | 1.38258800  | −0.09749800 |
| H                                                                    | −1.49568500 | −0.34218500 | −0.24952500 |
| H                                                                    | −0.43595400 | −1.33552500 | 0.45523000  |
| C                                                                    | 0.97574400  | 2.33547400  | −0.58476900 |
| O                                                                    | −0.25198300 | 2.16832500  | −0.81824900 |
| O                                                                    | 1.73780800  | 3.27048500  | −0.75078700 |
| TS <sub>3,4-Os</sub>                                                 |             |             |             |
| G <sub>solv</sub> = −2139.105693; E <sub>solv</sub> = −2139.88748115 |             |             |             |
| C                                                                    | −1.47261000 | −0.46409900 | 3.18548200  |
| H                                                                    | −1.60992000 | −0.01756800 | 4.17741500  |
| C                                                                    | −0.73260200 | −1.82733100 | 3.36162600  |
| H                                                                    | 0.17133200  | −1.90148200 | 2.75386400  |
| H                                                                    | −0.42782500 | −1.94623200 | 4.40672300  |
| C                                                                    | −1.75148300 | −2.91284200 | 2.96439800  |
| H                                                                    | −1.62158000 | −3.17109400 | 1.90532100  |
| H                                                                    | −1.63175200 | −3.83282200 | 3.54534900  |
| C                                                                    | −3.11502600 | −2.24498900 | 3.15448300  |
| H                                                                    | −3.37708900 | −2.21028700 | 4.22039300  |
| H                                                                    | −3.92503200 | −2.75874900 | 2.62666900  |

---

|   |             |             |             |
|---|-------------|-------------|-------------|
| C | -2.86394900 | -0.83177100 | 2.62363200  |
| H | -3.63321000 | -0.10952700 | 2.91431500  |
| H | -2.83595900 | -0.86818700 | 1.52820400  |
| C | 0.81815900  | 1.29948700  | 3.32101900  |
| H | 0.33898600  | 1.55828300  | 4.27246300  |
| C | 1.87588800  | 0.18851700  | 3.56364400  |
| H | 1.66808000  | -0.38842200 | 4.46967700  |
| H | 1.88875100  | -0.51571500 | 2.72378800  |
| C | 3.22241500  | 0.92017100  | 3.60622500  |
| H | 3.37869500  | 1.38202000  | 4.58971100  |
| H | 4.06900600  | 0.25349600  | 3.41180200  |
| C | 3.04626700  | 2.00597800  | 2.54456300  |
| H | 3.10612800  | 1.55219500  | 1.54467900  |
| H | 3.80034500  | 2.79770500  | 2.59089200  |
| C | 1.62666600  | 2.52727900  | 2.80165900  |
| H | 1.20005100  | 2.99891000  | 1.91247400  |
| H | 1.64941300  | 3.29967600  | 3.57849600  |
| C | -1.62185100 | 2.30252200  | 2.16344000  |
| H | -0.95557100 | 3.08130900  | 1.77504100  |
| C | -2.17078600 | 2.79001200  | 3.51999700  |
| H | -2.51501400 | 1.95000000  | 4.13696300  |
| H | -1.42205400 | 3.34056200  | 4.09882700  |
| C | -3.37796500 | 3.64579100  | 3.12333100  |
| H | -4.05027000 | 3.85258600  | 3.96254900  |
| H | -3.03394900 | 4.60844300  | 2.72359400  |
| C | -4.03318000 | 2.81890000  | 2.01174900  |
| H | -4.71626500 | 3.40496600  | 1.38915700  |
| H | -4.61952500 | 2.00754800  | 2.46278800  |
| C | -2.85156200 | 2.24105600  | 1.20628800  |
| H | -2.63876900 | 2.84133800  | 0.31842600  |
| H | -3.06293700 | 1.23159900  | 0.84587200  |
| C | 0.54898300  | 0.09331300  | -3.60590200 |
| H | 0.70931100  | -0.58979100 | -4.44957100 |
| C | 1.64761700  | 1.17265600  | -3.67174700 |
| H | 2.60818800  | 0.76628700  | -4.00463000 |
| H | 1.80949900  | 1.63596400  | -2.69310000 |
| C | 1.06468000  | 2.21414400  | -4.63163000 |
| H | 1.57825700  | 3.17868600  | -4.56948300 |
| H | 1.14808100  | 1.85349500  | -5.66594200 |
| C | -0.40618700 | 2.29514800  | -4.20706200 |
| H | -0.49422400 | 2.94331300  | -3.32941500 |
| H | -1.05194100 | 2.70412300  | -4.99074700 |
| C | -0.79406200 | 0.85143200  | -3.81721200 |
| H | -1.37732400 | 0.36278700  | -4.60570500 |
| H | -1.40765700 | 0.85623800  | -2.91057900 |
| C | -0.71393100 | -2.23166700 | -2.57209400 |
| H | -1.60123600 | -1.62281200 | -2.78843300 |
| C | -1.11200800 | -3.26595000 | -1.47634400 |
| H | -0.38654500 | -3.31860000 | -0.66227100 |
| H | -2.06226800 | -2.96923000 | -1.02089800 |
| C | -1.23146400 | -4.62438100 | -2.20164300 |
| H | -0.32141800 | -5.21515100 | -2.03832500 |
| H | -2.07337900 | -5.22177800 | -1.83839700 |
| C | -1.34611100 | -4.27122200 | -3.68865100 |
| H | -2.37407000 | -3.96913800 | -3.92812900 |
| H | -1.08076700 | -5.10208000 | -4.35030500 |
| C | -0.40944600 | -3.06816200 | -3.83195700 |
| H | -0.57318400 | -2.50733700 | -4.75754300 |

---

|                                                                    |             |             |             |
|--------------------------------------------------------------------|-------------|-------------|-------------|
| H                                                                  | 0.63160500  | −3.41616900 | −3.83368700 |
| C                                                                  | 2.19429500  | −1.79574400 | −2.16347900 |
| H                                                                  | 2.37775300  | −2.05711800 | −3.21272600 |
| C                                                                  | 3.35138500  | −0.87481800 | −1.66299900 |
| H                                                                  | 4.01102800  | −0.61772800 | −2.49783200 |
| H                                                                  | 2.98722300  | 0.07325200  | −1.25079800 |
| C                                                                  | 4.10954300  | −1.68933700 | −0.59664600 |
| H                                                                  | 5.18171300  | −1.46970100 | −0.58609200 |
| H                                                                  | 3.71447500  | −1.45665300 | 0.40072300  |
| C                                                                  | 3.78983700  | −3.14704100 | −0.93730200 |
| H                                                                  | 3.98883100  | −3.83697600 | −0.11092000 |
| H                                                                  | 4.38507200  | −3.47472200 | −1.79969900 |
| C                                                                  | 2.30681000  | −3.07926600 | −1.31137200 |
| H                                                                  | 1.72055800  | −2.98049200 | −0.39058500 |
| H                                                                  | 1.94523500  | −3.96510000 | −1.84340600 |
| P                                                                  | −0.55304600 | 0.78838300  | 2.17272300  |
| P                                                                  | 0.54268500  | −0.95598700 | −2.08199400 |
| Os                                                                 | 0.06839200  | 0.03819300  | 0.01174900  |
| H                                                                  | 1.06553400  | −1.05081800 | 0.63786700  |
| H                                                                  | 1.58318900  | 2.07219500  | −0.24821500 |
| H                                                                  | −1.41110500 | −0.44676900 | −0.22565900 |
| H                                                                  | −0.34376700 | −1.40363700 | 0.52572600  |
| C                                                                  | 0.71358700  | 2.67092600  | −0.66735500 |
| O                                                                  | −0.36892800 | 2.00662400  | −0.80764100 |
| O                                                                  | 0.91956600  | 3.85038500  | −0.92719600 |
| <b>4Os</b>                                                         |             |             |             |
| $G_{\text{solv}} = -2139.112004; E_{\text{solv}} = -2139.89433461$ |             |             |             |
| C                                                                  | −1.69072800 | −0.37973100 | 3.14916000  |
| H                                                                  | −1.75302600 | 0.05394700  | 4.15445100  |
| C                                                                  | −1.18629500 | −1.85060000 | 3.27686800  |
| H                                                                  | −0.31358400 | −2.05291300 | 2.65173000  |
| H                                                                  | −0.89406300 | −2.05015900 | 4.31317900  |
| C                                                                  | −2.37423600 | −2.74073000 | 2.86231500  |
| H                                                                  | −2.28959300 | −2.99390500 | 1.79788700  |
| H                                                                  | −2.41043000 | −3.68011400 | 3.42292500  |
| C                                                                  | −3.60717100 | −1.85878000 | 3.07330800  |
| H                                                                  | −3.86140700 | −1.80739500 | 4.14040700  |
| H                                                                  | −4.49128400 | −2.21615900 | 2.53547400  |
| C                                                                  | −3.12215900 | −0.49375700 | 2.57954100  |
| H                                                                  | −3.76122600 | 0.33985400  | 2.88772400  |
| H                                                                  | −3.09608900 | −0.50673100 | 1.48263000  |
| C                                                                  | 0.86661900  | 0.99126500  | 3.28334300  |
| H                                                                  | 0.46402600  | 1.35423200  | 4.23702300  |
| C                                                                  | 1.71599400  | −0.27286500 | 3.55318300  |
| H                                                                  | 1.34809500  | −0.84424200 | 4.41062500  |
| H                                                                  | 1.70137100  | −0.93698500 | 2.68102200  |
| C                                                                  | 3.13874100  | 0.26178300  | 3.74488200  |
| H                                                                  | 3.24648700  | 0.70615400  | 4.74316000  |
| H                                                                  | 3.90117200  | −0.51749300 | 3.64197100  |
| C                                                                  | 3.23640700  | 1.34780400  | 2.67161700  |
| H                                                                  | 3.37994000  | 0.87743300  | 1.69034000  |
| H                                                                  | 4.06673100  | 2.04313500  | 2.82928600  |
| C                                                                  | 1.86487100  | 2.04467900  | 2.71249300  |
| H                                                                  | 1.57987400  | 2.39955800  | 1.71815500  |
| H                                                                  | 1.89187800  | 2.92302000  | 3.36627800  |
| C                                                                  | −1.39402700 | 2.39269400  | 2.19676400  |
| H                                                                  | −0.59371400 | 3.07641700  | 1.88776300  |
| C                                                                  | −1.93610700 | 2.90149700  | 3.54750100  |

|    |             |             |             |
|----|-------------|-------------|-------------|
| H  | -2.46109100 | 2.10642400  | 4.09193900  |
| H  | -1.14324500 | 3.28198700  | 4.19996300  |
| C  | -2.94742800 | 3.97552900  | 3.13338700  |
| H  | -3.62526600 | 4.26058100  | 3.94484700  |
| H  | -2.41605400 | 4.87840400  | 2.80681900  |
| C  | -3.66754000 | 3.32991200  | 1.94392300  |
| H  | -4.18332600 | 4.05906800  | 1.31178200  |
| H  | -4.42491200 | 2.62808700  | 2.31663000  |
| C  | -2.56326000 | 2.56899400  | 1.18020100  |
| H  | -2.20571700 | 3.13701000  | 0.31757800  |
| H  | -2.93440200 | 1.61649300  | 0.79017200  |
| C  | 0.33670800  | 0.02630100  | -3.62739700 |
| H  | 0.51369200  | -0.63716500 | -4.48269100 |
| C  | 1.31037000  | 1.21793600  | -3.74792800 |
| H  | 2.27137000  | 0.92079200  | -4.18009300 |
| H  | 1.50662400  | 1.65917700  | -2.76721600 |
| C  | 0.54377900  | 2.22323800  | -4.61346800 |
| H  | 0.95779400  | 3.23479600  | -4.55333500 |
| H  | 0.57378100  | 1.90958500  | -5.66591600 |
| C  | -0.88568100 | 2.13319300  | -4.06915800 |
| H  | -0.95997800 | 2.72093100  | -3.14835300 |
| H  | -1.63391800 | 2.51540700  | -4.77097200 |
| C  | -1.09094000 | 0.63825800  | -3.74725200 |
| H  | -1.64910600 | 0.12991800  | -4.54146800 |
| H  | -1.67147300 | 0.52026900  | -2.82397900 |
| C  | -0.54458700 | -2.45910200 | -2.57238500 |
| H  | -1.51713500 | -1.98809100 | -2.76652800 |
| C  | -0.75975500 | -3.54357100 | -1.47247700 |
| H  | -0.06575800 | -3.44603300 | -0.63560500 |
| H  | -1.76421600 | -3.43736800 | -1.04993800 |
| C  | -0.60236300 | -4.90320600 | -2.18378200 |
| H  | 0.41849300  | -5.28247500 | -2.04746600 |
| H  | -1.28489000 | -5.66332100 | -1.79125400 |
| C  | -0.83272200 | -4.59506300 | -3.66646100 |
| H  | -1.90720800 | -4.49576600 | -3.86972700 |
| H  | -0.43704300 | -5.36648800 | -4.33510100 |
| C  | -0.14351600 | -3.23905300 | -3.84380400 |
| H  | -0.44185500 | -2.72428800 | -4.76225500 |
| H  | 0.94228100  | -3.39144400 | -3.88759000 |
| C  | 2.27033400  | -1.60746200 | -2.19918700 |
| H  | 2.46208800  | -1.88294300 | -3.24329000 |
| C  | 3.31546000  | -0.53133800 | -1.76542800 |
| H  | 3.90898000  | -0.22158400 | -2.63150700 |
| H  | 2.84649500  | 0.37017600  | -1.36011800 |
| C  | 4.20673200  | -1.21380300 | -0.70925500 |
| H  | 5.24318500  | -0.86382200 | -0.74492800 |
| H  | 3.82058800  | -1.00012100 | 0.29606000  |
| C  | 4.05737800  | -2.71021800 | -0.99271800 |
| H  | 4.36930000  | -3.34182300 | -0.15459500 |
| H  | 4.65522200  | -2.99409900 | -1.86893000 |
| C  | 2.56461300  | -2.83326200 | -1.30670900 |
| H  | 2.00370500  | -2.76329400 | -0.36699200 |
| H  | 2.29088800  | -3.77618500 | -1.79080900 |
| P  | -0.58190700 | 0.72615100  | 2.15848000  |
| P  | 0.51931800  | -1.00789700 | -2.10317300 |
| Os | -0.05681900 | -0.03569900 | -0.01692300 |
| H  | 1.40357600  | -0.33188800 | 0.49405000  |
| H  | 1.58504300  | 3.12088400  | -0.42630600 |

|                                                                    |             |             |             |
|--------------------------------------------------------------------|-------------|-------------|-------------|
| H                                                                  | −1.12256200 | −1.20558800 | 0.21050700  |
| H                                                                  | 0.27951100  | −1.47228300 | 0.59821000  |
| C                                                                  | 0.51311400  | 3.08355100  | −0.70994200 |
| O                                                                  | 0.02092000  | 1.89776400  | −0.75626900 |
| O                                                                  | −0.08243900 | 4.12147800  | −0.97896400 |
| <b>TS<sub>4,5-Os</sub></b>                                         |             |             |             |
| $G_{\text{solv}} = -2139.111903; E_{\text{solv}} = -2139.89420676$ |             |             |             |
| C                                                                  | −1.59491000 | −0.43033800 | 3.20903600  |
| H                                                                  | −1.64382200 | 0.01861400  | 4.20855900  |
| C                                                                  | −0.94240000 | −1.84187200 | 3.33679400  |
| H                                                                  | −0.08928000 | −1.97479800 | 2.66785300  |
| H                                                                  | −0.57590900 | −1.98604200 | 4.35863200  |
| C                                                                  | −2.05820700 | −2.85316700 | 3.00791200  |
| H                                                                  | −2.01016300 | −3.12181400 | 1.94508200  |
| H                                                                  | −1.96982000 | −3.77826200 | 3.58630100  |
| C                                                                  | −3.35801500 | −2.09055500 | 3.27467700  |
| H                                                                  | −3.55562800 | −2.03872600 | 4.35366800  |
| H                                                                  | −4.23166000 | −2.54447500 | 2.79565500  |
| C                                                                  | −3.03814300 | −0.69775100 | 2.72733900  |
| H                                                                  | −3.73746100 | 0.07708000  | 3.05708200  |
| H                                                                  | −3.07346800 | −0.73472800 | 1.63179800  |
| C                                                                  | 0.79281500  | 1.22454800  | 3.20376000  |
| H                                                                  | 0.38825300  | 1.60649700  | 4.14864100  |
| C                                                                  | 1.75915500  | 0.05147800  | 3.50641700  |
| H                                                                  | 1.51201800  | −0.45594000 | 4.44376900  |
| H                                                                  | 1.71724400  | −0.69638100 | 2.70659900  |
| C                                                                  | 3.15378500  | 0.68698800  | 3.50835100  |
| H                                                                  | 3.33254800  | 1.21492700  | 4.45430500  |
| H                                                                  | 3.95346400  | −0.04998600 | 3.38042000  |
| C                                                                  | 3.06350000  | 1.69082500  | 2.35803900  |
| H                                                                  | 3.10660900  | 1.15415500  | 1.40083900  |
| H                                                                  | 3.86757700  | 2.43372200  | 2.36043700  |
| C                                                                  | 1.67399600  | 2.32274500  | 2.53382900  |
| H                                                                  | 1.27240500  | 2.66622700  | 1.57674700  |
| H                                                                  | 1.73092800  | 3.20002400  | 3.18776800  |
| C                                                                  | −1.65903800 | 2.32779900  | 2.18397300  |
| H                                                                  | −0.95641700 | 3.09203800  | 1.82854900  |
| C                                                                  | −2.20799100 | 2.80774800  | 3.54181900  |
| H                                                                  | −2.62908300 | 1.97505600  | 4.11930300  |
| H                                                                  | −1.43964400 | 3.28496900  | 4.15915700  |
| C                                                                  | −3.33819300 | 3.76040300  | 3.13864200  |
| H                                                                  | −4.01569100 | 3.99541000  | 3.96630400  |
| H                                                                  | −2.91341200 | 4.70427200  | 2.77395600  |
| C                                                                  | −4.02585500 | 3.01498400  | 1.98840400  |
| H                                                                  | −4.62546200 | 3.67469100  | 1.35390600  |
| H                                                                  | −4.70366400 | 2.25666000  | 2.40130400  |
| C                                                                  | −2.87621100 | 2.33873600  | 1.21019500  |
| H                                                                  | −2.60947400 | 2.90354500  | 0.31327500  |
| H                                                                  | −3.15899900 | 1.33630300  | 0.87609000  |
| C                                                                  | 0.47743400  | 0.10837800  | −3.62252700 |
| H                                                                  | 0.69753300  | −0.54995200 | −4.47290000 |
| C                                                                  | 1.53564400  | 1.22885100  | −3.61308500 |
| H                                                                  | 2.53030900  | 0.86205700  | −3.88605400 |
| H                                                                  | 1.60345400  | 1.68344900  | −2.61998000 |
| C                                                                  | 0.97456900  | 2.24669400  | −4.61106500 |
| H                                                                  | 1.44540100  | 3.23143900  | −4.52395200 |
| H                                                                  | 1.13934000  | 1.88909700  | −5.63641600 |
| C                                                                  | −0.52489700 | 2.27372900  | −4.28870300 |

|                                                                    |             |             |             |
|--------------------------------------------------------------------|-------------|-------------|-------------|
| H                                                                  | -0.70849600 | 2.94829400  | -3.44629900 |
| H                                                                  | -1.13014200 | 2.62830700  | -5.12894100 |
| C                                                                  | -0.87884700 | 0.82529100  | -3.87856200 |
| H                                                                  | -1.43706400 | 0.30511400  | -4.66462600 |
| H                                                                  | -1.51125800 | 0.82979500  | -2.98360000 |
| C                                                                  | -0.77093500 | -2.26387800 | -2.67636100 |
| H                                                                  | -1.67006600 | -1.67702900 | -2.90463500 |
| C                                                                  | -1.16652700 | -3.33672600 | -1.61620200 |
| H                                                                  | -0.50327500 | -3.34184900 | -0.74935500 |
| H                                                                  | -2.16833500 | -3.11686900 | -1.23281200 |
| C                                                                  | -1.14019800 | -4.69027300 | -2.35578500 |
| H                                                                  | -0.18275300 | -5.19625300 | -2.17697000 |
| H                                                                  | -1.93147100 | -5.36743100 | -2.01953200 |
| C                                                                  | -1.25055200 | -4.32638000 | -3.83986500 |
| H                                                                  | -2.29287700 | -4.09495200 | -4.09577000 |
| H                                                                  | -0.91355300 | -5.12631300 | -4.50715000 |
| C                                                                  | -0.39735200 | -3.05884500 | -3.94609200 |
| H                                                                  | -0.58426900 | -2.49207900 | -4.86367200 |
| H                                                                  | 0.66416300  | -3.33760900 | -3.93963800 |
| C                                                                  | 2.10105800  | -1.76922400 | -2.13235800 |
| H                                                                  | 2.31048400  | -2.05690800 | -3.16970900 |
| C                                                                  | 3.23993000  | -0.82265000 | -1.63612900 |
| H                                                                  | 3.91648000  | -0.59270300 | -2.46570700 |
| H                                                                  | 2.86070400  | 0.13227000  | -1.25964000 |
| C                                                                  | 3.98025300  | -1.59958800 | -0.53068000 |
| H                                                                  | 5.04946800  | -1.36744200 | -0.49888200 |
| H                                                                  | 3.55708700  | -1.34372900 | 0.44958500  |
| C                                                                  | 3.68420400  | -3.06962400 | -0.83692100 |
| H                                                                  | 3.87263500  | -3.73438100 | 0.01232600  |
| H                                                                  | 4.30109500  | -3.41463600 | -1.67727100 |
| C                                                                  | 2.20893600  | -3.02786600 | -1.24324200 |
| H                                                                  | 1.60179800  | -2.90869200 | -0.33837500 |
| H                                                                  | 1.86728300  | -3.93126900 | -1.75887600 |
| P                                                                  | -0.66033900 | 0.76721700  | 2.14544100  |
| P                                                                  | 0.43107900  | -0.96351200 | -2.11512500 |
| Os                                                                 | -0.13184600 | 0.02321400  | -0.03306300 |
| H                                                                  | 1.24074000  | -0.51273500 | 0.53163100  |
| H                                                                  | 1.11629200  | 3.55255900  | -0.58123600 |
| H                                                                  | -1.34434500 | -0.99674700 | 0.09424200  |
| H                                                                  | -0.00610300 | -1.45953500 | 0.56620500  |
| C                                                                  | 0.07603000  | 3.21692100  | -0.76906200 |
| O                                                                  | -0.05638700 | 1.93898700  | -0.80068200 |
| O                                                                  | -0.80632600 | 4.04579500  | -0.96327900 |
| 5Os                                                                |             |             |             |
| $G_{\text{solv}} = -2139.116007; E_{\text{solv}} = -2139.89726613$ |             |             |             |
| C                                                                  | -1.06580500 | -0.50090000 | 3.32279600  |
| H                                                                  | -1.20619600 | -0.01330500 | 4.29481800  |
| C                                                                  | -0.06500700 | -1.68457100 | 3.50643300  |
| H                                                                  | 0.78640300  | -1.62658200 | 2.82415600  |
| H                                                                  | 0.33625900  | -1.67161000 | 4.52542800  |
| C                                                                  | -0.88131200 | -2.96764200 | 3.25952400  |
| H                                                                  | -0.78770100 | -3.26755400 | 2.20786800  |
| H                                                                  | -0.54068500 | -3.80680200 | 3.87437900  |
| C                                                                  | -2.32918800 | -2.55761700 | 3.53752500  |
| H                                                                  | -2.50747800 | -2.49957400 | 4.61965900  |
| H                                                                  | -3.06338600 | -3.25053300 | 3.11382400  |
| C                                                                  | -2.40074400 | -1.16211400 | 2.91291200  |
| H                                                                  | -3.26926000 | -0.58018100 | 3.23754700  |

---

|   |             |             |             |
|---|-------------|-------------|-------------|
| H | −2.45522200 | −1.26662400 | 1.82258000  |
| C | 0.89519800  | 1.62214600  | 3.10646800  |
| H | 0.51507500  | 1.81497800  | 4.11783800  |
| C | 2.18152500  | 0.77525400  | 3.22471100  |
| H | 2.13323200  | 0.04928500  | 4.04138300  |
| H | 2.35780100  | 0.21478400  | 2.29563700  |
| C | 3.28907600  | 1.81618700  | 3.40450300  |
| H | 3.26310000  | 2.21579900  | 4.42691900  |
| H | 4.29034000  | 1.40817800  | 3.23143100  |
| C | 2.89782300  | 2.90246300  | 2.39968300  |
| H | 3.20628700  | 2.59278300  | 1.39296900  |
| H | 3.37012400  | 3.86861800  | 2.60262300  |
| C | 1.35735000  | 2.96946500  | 2.47057000  |
| H | 0.94061800  | 3.12108200  | 1.47191900  |
| H | 1.02265300  | 3.80705500  | 3.09142200  |
| C | −1.78097000 | 2.12365100  | 2.18180800  |
| H | −1.30248200 | 2.96582400  | 1.66721000  |
| C | −2.25402400 | 2.62588600  | 3.56033800  |
| H | −2.41123400 | 1.79121900  | 4.25602100  |
| H | −1.53785200 | 3.31293200  | 4.02351100  |
| C | −3.60410400 | 3.27818500  | 3.24672300  |
| H | −4.21200700 | 3.45705700  | 4.13997400  |
| H | −3.44137100 | 4.24469600  | 2.75262100  |
| C | −4.24494700 | 2.28801600  | 2.26692300  |
| H | −5.04977700 | 2.73536900  | 1.67557100  |
| H | −4.68230200 | 1.45371300  | 2.83112200  |
| C | −3.07901800 | 1.78476600  | 1.38892900  |
| H | −3.04326200 | 2.29234600  | 0.42200600  |
| H | −3.17732900 | 0.71897000  | 1.17180900  |
| C | 1.02168100  | 0.08619400  | −3.53052900 |
| H | 1.24525400  | −0.59105800 | −4.36626200 |
| C | 2.24491300  | 0.99605300  | −3.32145700 |
| H | 3.19188200  | 0.45092200  | −3.38613800 |
| H | 2.19266500  | 1.48000600  | −2.33961600 |
| C | 2.08320400  | 2.04291400  | −4.42853500 |
| H | 2.69917000  | 2.93341700  | −4.26533400 |
| H | 2.38178000  | 1.60781700  | −5.39142600 |
| C | 0.57750800  | 2.35089300  | −4.42671500 |
| H | 0.36256800  | 3.16045700  | −3.72080300 |
| H | 0.21964000  | 2.68121700  | −5.40677300 |
| C | −0.11785200 | 1.04852500  | −3.95621300 |
| H | −0.72281600 | 0.59845800  | −4.75031900 |
| H | −0.79452800 | 1.26336600  | −3.12170000 |
| C | −0.87504900 | −1.90432100 | −2.79825400 |
| H | −1.57750500 | −1.09939800 | −3.04781900 |
| C | −1.61090000 | −2.88344000 | −1.83439200 |
| H | −1.02705200 | −3.12003600 | −0.94297900 |
| H | −2.53618000 | −2.41897000 | −1.47896800 |
| C | −1.90150800 | −4.15142600 | −2.66548100 |
| H | −1.14111100 | −4.91553100 | −2.45939700 |
| H | −2.87504000 | −4.59314000 | −2.43161500 |
| C | −1.78192800 | −3.70209400 | −4.12577100 |
| H | −2.69680200 | −3.18178100 | −4.43795800 |
| H | −1.61737600 | −4.53238900 | −4.82022200 |
| C | −0.61314700 | −2.71336100 | −4.08546200 |
| H | −0.55726300 | −2.07651300 | −4.97411200 |
| H | 0.32999900  | −3.27109100 | −4.01746300 |
| C | 1.97706900  | −2.18027500 | −2.02473500 |

---

|                                                                    |             |             |             |
|--------------------------------------------------------------------|-------------|-------------|-------------|
| H                                                                  | 2.22030700  | −2.45547100 | −3.05802000 |
| C                                                                  | 3.24778200  | −1.56716900 | −1.35539400 |
| H                                                                  | 4.04049400  | −1.44819600 | −2.10117400 |
| H                                                                  | 3.06210800  | −0.57315200 | −0.93193600 |
| C                                                                  | 3.67373500  | −2.56720700 | −0.26245700 |
| H                                                                  | 4.75959400  | −2.60670300 | −0.13018900 |
| H                                                                  | 3.23316100  | −2.27648800 | 0.69991300  |
| C                                                                  | 3.06640700  | −3.89919900 | −0.71023200 |
| H                                                                  | 3.00681500  | −4.63813600 | 0.09560900  |
| H                                                                  | 3.66242400  | −4.33547800 | −1.52281800 |
| C                                                                  | 1.69090000  | −3.47307800 | −1.23007500 |
| H                                                                  | 1.04542000  | −3.25905000 | −0.37053600 |
| H                                                                  | 1.19398200  | −4.23457800 | −1.83992700 |
| P                                                                  | −0.47608500 | 0.81082600  | 2.15336200  |
| P                                                                  | 0.56557900  | −0.97776500 | −2.08654400 |
| Os                                                                 | 0.10285200  | 0.03796700  | −0.00316000 |
| H                                                                  | 0.86153900  | −1.19974400 | 0.66892800  |
| H                                                                  | 0.38219600  | 3.91637600  | −1.19583600 |
| H                                                                  | −1.42281300 | −0.19085700 | −0.31070400 |
| H                                                                  | −0.57425600 | −1.34619800 | 0.41209300  |
| C                                                                  | −0.24798300 | 3.01457100  | −1.06216600 |
| O                                                                  | 0.42996200  | 1.99226400  | −0.68455100 |
| O                                                                  | −1.45512500 | 3.07179600  | −1.28179700 |
| 6Os                                                                |             |             |             |
| $G_{\text{solv}} = -2550.734533; E_{\text{solv}} = -2551.70098720$ |             |             |             |
| C                                                                  | −1.12590900 | −1.01615800 | 3.38801800  |
| H                                                                  | −1.38886100 | −0.56172200 | 4.35087400  |
| C                                                                  | 0.23081600  | −1.77138500 | 3.55109900  |
| H                                                                  | 0.99593200  | −1.41879000 | 2.85358700  |
| H                                                                  | 0.62057900  | −1.61522300 | 4.56272600  |
| C                                                                  | −0.08811100 | −3.25970400 | 3.32427900  |
| H                                                                  | 0.04210600  | −3.50810900 | 2.26281600  |
| H                                                                  | 0.56349300  | −3.92263400 | 3.90296900  |
| C                                                                  | −1.56811900 | −3.38564600 | 3.69240400  |
| H                                                                  | −1.68988500 | −3.37667500 | 4.78373500  |
| H                                                                  | −2.03296700 | −4.30068100 | 3.31036400  |
| C                                                                  | −2.16559100 | −2.11691400 | 3.07818300  |
| H                                                                  | −3.15961000 | −1.86638600 | 3.46229900  |
| H                                                                  | −2.25777500 | −2.26943200 | 1.99748300  |
| C                                                                  | −0.25292100 | 1.69408900  | 3.18915800  |
| H                                                                  | −0.90495000 | 1.83543500  | 4.06242900  |
| C                                                                  | 1.16354900  | 1.37867200  | 3.70701000  |
| H                                                                  | 1.13340200  | 0.74649700  | 4.59947100  |
| H                                                                  | 1.73847500  | 0.84696800  | 2.94425800  |
| C                                                                  | 1.81459900  | 2.75757900  | 3.98460700  |
| H                                                                  | 2.01708900  | 2.90441400  | 5.05061400  |
| H                                                                  | 2.77365200  | 2.82388500  | 3.46218500  |
| C                                                                  | 0.82671200  | 3.81774700  | 3.44931600  |
| H                                                                  | 1.33197000  | 4.65989000  | 2.96383600  |
| H                                                                  | 0.23224200  | 4.23039300  | 4.27413600  |
| C                                                                  | −0.09284800 | 3.05189300  | 2.49032900  |
| H                                                                  | 0.40083700  | 2.91069700  | 1.52377200  |
| H                                                                  | −1.04712400 | 3.56089000  | 2.31794100  |
| C                                                                  | −2.78896400 | 1.06454500  | 2.09585700  |
| H                                                                  | −2.64912900 | 1.99171100  | 1.52911100  |
| C                                                                  | −3.46035200 | 1.41555200  | 3.44011400  |
| H                                                                  | −3.29662800 | 0.62713700  | 4.18740500  |
| H                                                                  | −3.08801400 | 2.35440300  | 3.86228200  |

|    |             |             |             |
|----|-------------|-------------|-------------|
| C  | -4.94926300 | 1.47745200  | 3.08673300  |
| H  | -5.60144000 | 1.45127500  | 3.96617800  |
| H  | -5.15877900 | 2.40666200  | 2.54113600  |
| C  | -5.13357000 | 0.27232900  | 2.15958700  |
| H  | -6.03639200 | 0.34087400  | 1.54428800  |
| H  | -5.22182000 | -0.63987900 | 2.76445600  |
| C  | -3.84409000 | 0.22514100  | 1.31360700  |
| H  | -3.99104500 | 0.67903300  | 0.32929700  |
| H  | -3.52842200 | -0.80441500 | 1.13611500  |
| C  | -0.13627200 | -0.40845800 | -3.64351500 |
| H  | -0.16575400 | -1.12146600 | -4.47834600 |
| C  | 1.11929700  | 0.46248400  | -3.80299900 |
| H  | 1.99849700  | -0.11306500 | -4.11028800 |
| H  | 1.35208400  | 0.95212000  | -2.85415100 |
| C  | 0.68941900  | 1.50274700  | -4.84029100 |
| H  | 1.36102000  | 2.36799400  | -4.88417800 |
| H  | 0.67344400  | 1.04737800  | -5.83967300 |
| C  | -0.73250900 | 1.87533400  | -4.39977700 |
| H  | -0.68467200 | 2.66031300  | -3.63676600 |
| H  | -1.34192800 | 2.26315200  | -5.22207900 |
| C  | -1.32455300 | 0.58376100  | -3.78497900 |
| H  | -2.10546400 | 0.15429300  | -4.42179300 |
| H  | -1.78611200 | 0.80237200  | -2.81595400 |
| C  | -1.83396000 | -2.29503900 | -2.39892000 |
| H  | -2.54614900 | -1.46662600 | -2.50057100 |
| C  | -2.37320700 | -3.22161800 | -1.26758800 |
| H  | -1.59590200 | -3.53460800 | -0.56823200 |
| H  | -3.11988000 | -2.68073800 | -0.67768200 |
| C  | -2.99425600 | -4.44393600 | -1.98130400 |
| H  | -2.30162300 | -5.29386900 | -1.93702100 |
| H  | -3.93219900 | -4.76778500 | -1.51950500 |
| C  | -3.16549600 | -4.00843800 | -3.44091800 |
| H  | -4.07267800 | -3.39997000 | -3.55180800 |
| H  | -3.24277000 | -4.85112000 | -4.13569800 |
| C  | -1.92953600 | -3.13898900 | -3.68535100 |
| H  | -2.01015900 | -2.52370200 | -4.58714400 |
| H  | -1.05058700 | -3.78661600 | -3.80093100 |
| C  | 1.08022200  | -2.69902300 | -2.34223000 |
| H  | 0.96650700  | -3.06171200 | -3.37024200 |
| C  | 2.52742400  | -2.15257700 | -2.15597800 |
| H  | 3.10391200  | -2.33476000 | -3.07076400 |
| H  | 2.56490200  | -1.07909500 | -1.96693500 |
| C  | 3.12623800  | -2.95598200 | -0.99173200 |
| H  | 4.21753300  | -3.02861800 | -1.04729200 |
| H  | 2.87085900  | -2.47495800 | -0.03778600 |
| C  | 2.41660300  | -4.30826500 | -1.08221000 |
| H  | 2.51227800  | -4.91262200 | -0.17375800 |
| H  | 2.82287100  | -4.89157600 | -1.91932800 |
| C  | 0.96808700  | -3.89763000 | -1.36671400 |
| H  | 0.51397100  | -3.57736300 | -0.42266700 |
| H  | 0.35239100  | -4.70687900 | -1.77327000 |
| P  | -1.06119300 | 0.38124600  | 2.15857900  |
| P  | -0.22590700 | -1.40528100 | -2.08418700 |
| Os | -0.31513200 | -0.30493700 | 0.00296000  |
| H  | 0.24334900  | -1.66167100 | 0.66295200  |
| H  | -0.43690500 | 3.59153800  | -1.20308100 |
| H  | -1.85273800 | -0.22115000 | -0.36339000 |
| H  | -1.21667800 | -1.54451900 | 0.37947400  |

|                                                                       |             |             |             |
|-----------------------------------------------------------------------|-------------|-------------|-------------|
| C                                                                     | −0.90060600 | 2.62537800  | −0.91409600 |
| O                                                                     | −0.04152800 | 1.67894000  | −0.80117500 |
| O                                                                     | −2.11776400 | 2.56854700  | −0.75409100 |
| C                                                                     | 3.69810700  | 2.24029400  | −1.10501700 |
| C                                                                     | 3.66898900  | 2.63073000  | 0.41973200  |
| H                                                                     | 1.64096200  | −0.11224500 | 0.29976400  |
| C                                                                     | 5.08996000  | 2.07711800  | −1.69548100 |
| H                                                                     | 5.00847600  | 1.78063900  | −2.74522100 |
| H                                                                     | 5.63728200  | 3.02453200  | −1.65255300 |
| H                                                                     | 5.66902400  | 1.31355700  | −1.17233800 |
| C                                                                     | 4.89620300  | 2.15345000  | 1.19388200  |
| H                                                                     | 5.79124500  | 2.71534900  | 0.91106000  |
| H                                                                     | 4.72194400  | 2.30306600  | 2.26309800  |
| H                                                                     | 5.08410500  | 1.08823100  | 1.02909000  |
| C                                                                     | 2.85586400  | 3.16031700  | −1.98634700 |
| H                                                                     | 3.27821200  | 4.16842100  | −2.02511700 |
| H                                                                     | 2.83731200  | 2.76118200  | −3.00373200 |
| H                                                                     | 1.82491400  | 3.21295200  | −1.62768400 |
| C                                                                     | 3.40982000  | 4.10449700  | 0.69067800  |
| H                                                                     | 3.41415300  | 4.28824100  | 1.76850000  |
| H                                                                     | 4.19425200  | 4.72145300  | 0.23999100  |
| H                                                                     | 2.44274400  | 4.42077100  | 0.29447200  |
| O                                                                     | 3.04639700  | 0.94189200  | −1.10183400 |
| O                                                                     | 2.54384500  | 1.86583900  | 0.92305900  |
| B                                                                     | 2.29076400  | 0.88060800  | 0.02588300  |
| TS <sub>6,7-Os</sub>                                                  |             |             |             |
| $G_{\text{solv}} = -2550.731561$ ; $E_{\text{solv}} = -2551.69934453$ |             |             |             |
| C                                                                     | −0.66524900 | −0.45519600 | 3.23083000  |
| H                                                                     | −0.94197300 | −0.00437600 | 4.19132300  |
| C                                                                     | 0.68459400  | −1.21833700 | 3.41408900  |
| H                                                                     | 1.46162900  | −0.87127500 | 2.72695800  |
| H                                                                     | 1.06091500  | −1.06306000 | 4.43089900  |
| C                                                                     | 0.35968700  | −2.70521400 | 3.18519800  |
| H                                                                     | 0.50960700  | −2.95807000 | 2.12758700  |
| H                                                                     | 0.99530000  | −3.37065300 | 3.77850800  |
| C                                                                     | −1.12805800 | −2.82115100 | 3.52445600  |
| H                                                                     | −1.27096700 | −2.81206100 | 4.61321000  |
| H                                                                     | −1.59123800 | −3.73304200 | 3.13300200  |
| C                                                                     | −1.70612600 | −1.54824300 | 2.90008900  |
| H                                                                     | −2.70515000 | −1.29212300 | 3.26736600  |
| H                                                                     | −1.77993000 | −1.69866400 | 1.81775300  |
| C                                                                     | 0.26328200  | 2.23367700  | 3.06720000  |
| H                                                                     | −0.35440500 | 2.32281800  | 3.97204900  |
| C                                                                     | 1.70679300  | 1.92205800  | 3.50732500  |
| H                                                                     | 1.72832200  | 1.24699400  | 4.36789900  |
| H                                                                     | 2.25542200  | 1.43941800  | 2.69359600  |
| C                                                                     | 2.34489000  | 3.29820700  | 3.82489800  |
| H                                                                     | 2.57421600  | 3.40172900  | 4.89065400  |
| H                                                                     | 3.28753800  | 3.40395700  | 3.28045500  |
| C                                                                     | 1.32765100  | 4.36621500  | 3.36472100  |
| H                                                                     | 1.80754400  | 5.22159600  | 2.87647300  |
| H                                                                     | 0.77097500  | 4.75569400  | 4.22629600  |
| C                                                                     | 0.36886900  | 3.62444400  | 2.42566400  |
| H                                                                     | 0.81929100  | 3.53668100  | 1.43383600  |
| H                                                                     | −0.59927600 | 4.12522000  | 2.32217700  |
| C                                                                     | −2.27801100 | 1.66945100  | 1.94631400  |
| H                                                                     | −2.11806900 | 2.59194200  | 1.37731500  |
| C                                                                     | −2.93779700 | 2.03853000  | 3.29149200  |

|    |             |             |             |
|----|-------------|-------------|-------------|
| H  | -2.78385700 | 1.25086200  | 4.04162900  |
| H  | -2.54552800 | 2.97212500  | 3.70752100  |
| C  | -4.42716100 | 2.12177000  | 2.94542900  |
| H  | -5.07515700 | 2.11065800  | 3.82817600  |
| H  | -4.62584400 | 3.05052800  | 2.39495500  |
| C  | -4.63344000 | 0.91319000  | 2.02740000  |
| H  | -5.54041400 | 0.98756300  | 1.41896300  |
| H  | -4.72662800 | 0.00611300  | 2.63912800  |
| C  | -3.35121200 | 0.84558900  | 1.17166000  |
| H  | -3.50411700 | 1.29922300  | 0.18787500  |
| H  | -3.05164000 | -0.18824100 | 0.99137600  |
| C  | 0.35638700  | 0.15484600  | -3.78617000 |
| H  | 0.25974600  | -0.56016100 | -4.61364600 |
| C  | 1.62693800  | 0.98446300  | -4.03180200 |
| H  | 2.46107900  | 0.37593200  | -4.39700400 |
| H  | 1.94737800  | 1.46871200  | -3.10685600 |
| C  | 1.16113200  | 2.03790500  | -5.03999500 |
| H  | 1.85840000  | 2.87854400  | -5.13479100 |
| H  | 1.05433900  | 1.58392500  | -6.03450000 |
| C  | -0.20950800 | 2.45987900  | -4.49578700 |
| H  | -0.07449200 | 3.22268200  | -3.72020800 |
| H  | -0.85729100 | 2.89322200  | -5.26430100 |
| C  | -0.81096900 | 1.17925700  | -3.86888900 |
| H  | -1.62627900 | 0.77708400  | -4.48005800 |
| H  | -1.22886000 | 1.39901400  | -2.88059400 |
| C  | -1.27781000 | -1.77361800 | -2.53140500 |
| H  | -2.01131100 | -0.96130700 | -2.60960600 |
| C  | -1.77205300 | -2.73191400 | -1.40386000 |
| H  | -0.99104200 | -2.98504100 | -0.68527200 |
| H  | -2.56850600 | -2.24208000 | -0.83445200 |
| C  | -2.29621000 | -3.99507200 | -2.11980300 |
| H  | -1.52768700 | -4.77849700 | -2.10605600 |
| H  | -3.18934600 | -4.40910500 | -1.64118100 |
| C  | -2.53883600 | -3.55257200 | -3.56576400 |
| H  | -3.48678000 | -3.00327100 | -3.63957700 |
| H  | -2.58133000 | -4.38769100 | -4.27258500 |
| C  | -1.36875700 | -2.60148800 | -3.83052600 |
| H  | -1.51994100 | -1.97641600 | -4.71616200 |
| H  | -0.45629900 | -3.19045100 | -3.99097200 |
| C  | 1.65138600  | -2.10114100 | -2.48999300 |
| H  | 1.54440900  | -2.46790400 | -3.51732700 |
| C  | 3.08419900  | -1.51552200 | -2.30785700 |
| H  | 3.66070500  | -1.67849000 | -3.22625300 |
| H  | 3.09436400  | -0.44277800 | -2.11155600 |
| C  | 3.70970800  | -2.30647000 | -1.14907700 |
| H  | 4.80213400  | -2.35200300 | -1.21159700 |
| H  | 3.44896000  | -1.83177000 | -0.19342300 |
| C  | 3.03372900  | -3.67601500 | -1.23687700 |
| H  | 3.14933700  | -4.27878700 | -0.32967000 |
| H  | 3.44937100  | -4.24839000 | -2.07695900 |
| C  | 1.57407500  | -3.30103600 | -1.51274000 |
| H  | 1.11898500  | -2.99011600 | -0.56595700 |
| H  | 0.97498600  | -4.12517700 | -1.91408400 |
| P  | -0.56592600 | 0.95062300  | 2.01328300  |
| P  | 0.31150400  | -0.84490900 | -2.22537100 |
| Os | 0.19299500  | 0.25790700  | -0.13609600 |
| H  | 0.69942200  | -1.10550300 | 0.53974600  |
| H  | 0.42298100  | 4.20109700  | -1.21018900 |

|                                                                       |             |             |             |
|-----------------------------------------------------------------------|-------------|-------------|-------------|
| H                                                                     | -1.34088000 | 0.38070500  | -0.53860200 |
| H                                                                     | -0.76868800 | -0.94770300 | 0.20851400  |
| C                                                                     | -0.12735700 | 3.26756000  | -0.98570700 |
| O                                                                     | 0.63688300  | 2.22670400  | -0.94095400 |
| O                                                                     | -1.34067200 | 3.29769300  | -0.82908600 |
| C                                                                     | 4.13878000  | 2.84054400  | -1.32555200 |
| C                                                                     | 4.10483200  | 3.24649800  | 0.19400200  |
| H                                                                     | 2.06626400  | 0.57738500  | 0.15531700  |
| C                                                                     | 5.52434900  | 2.53882400  | -1.87829400 |
| H                                                                     | 5.44115000  | 2.24679100  | -2.92943500 |
| H                                                                     | 6.16479200  | 3.42541000  | -1.82229700 |
| H                                                                     | 6.00778100  | 1.72199700  | -1.33875000 |
| C                                                                     | 5.24658400  | 2.62840400  | 1.00131600  |
| H                                                                     | 6.21075100  | 3.07579700  | 0.74175300  |
| H                                                                     | 5.06572800  | 2.80089900  | 2.06573700  |
| H                                                                     | 5.30687300  | 1.54769800  | 0.84118700  |
| C                                                                     | 3.42456300  | 3.83398600  | -2.24062200 |
| H                                                                     | 3.97571800  | 4.77661800  | -2.30855500 |
| H                                                                     | 3.35289900  | 3.40709600  | -3.24469400 |
| H                                                                     | 2.41113400  | 4.04346900  | -1.89375600 |
| C                                                                     | 4.02298700  | 4.74289500  | 0.45501600  |
| H                                                                     | 4.00389900  | 4.92766800  | 1.53319300  |
| H                                                                     | 4.89631500  | 5.25689800  | 0.03959300  |
| H                                                                     | 3.12029800  | 5.17853700  | 0.02135800  |
| O                                                                     | 3.37813300  | 1.61247500  | -1.32374700 |
| O                                                                     | 2.88353200  | 2.63127500  | 0.66177800  |
| B                                                                     | 2.54818000  | 1.64751900  | -0.23358600 |
| 7Os                                                                   |             |             |             |
| $G_{\text{solv}} = -2550.743580$ ; $E_{\text{solv}} = -2551.71326484$ |             |             |             |
| C                                                                     | -1.33861400 | -1.09944900 | 3.31994200  |
| H                                                                     | -1.59626100 | -0.69170600 | 4.30399700  |
| C                                                                     | -0.04366300 | -1.95941400 | 3.46768500  |
| H                                                                     | 0.77977600  | -1.59862300 | 2.84531100  |
| H                                                                     | 0.29942100  | -1.92735200 | 4.50800300  |
| C                                                                     | -0.45033000 | -3.39185500 | 3.08309000  |
| H                                                                     | -0.30604400 | -3.53931100 | 2.00461900  |
| H                                                                     | 0.14060000  | -4.15216200 | 3.60397900  |
| C                                                                     | -1.94489600 | -3.45443800 | 3.40523100  |
| H                                                                     | -2.09513600 | -3.54523700 | 4.48917500  |
| H                                                                     | -2.45610600 | -4.29526900 | 2.92457400  |
| C                                                                     | -2.44719300 | -2.09585800 | 2.90755000  |
| H                                                                     | -3.42489500 | -1.81362900 | 3.31188500  |
| H                                                                     | -2.54273900 | -2.14153800 | 1.81795900  |
| C                                                                     | -0.17818200 | 1.50970000  | 3.31521800  |
| H                                                                     | -0.66384900 | 1.45385000  | 4.30016100  |
| C                                                                     | 1.30938300  | 1.17730500  | 3.49450800  |
| H                                                                     | 1.47638900  | 0.29672100  | 4.12231500  |
| H                                                                     | 1.76262900  | 0.99249100  | 2.51580100  |
| C                                                                     | 1.88166600  | 2.45703600  | 4.11809400  |
| H                                                                     | 1.70658000  | 2.44443900  | 5.20124400  |
| H                                                                     | 2.96384800  | 2.54729600  | 3.97024600  |
| C                                                                     | 1.09667400  | 3.61507700  | 3.46519700  |
| H                                                                     | 1.68603500  | 4.08718800  | 2.67488200  |
| H                                                                     | 0.84983400  | 4.38980300  | 4.19860500  |
| C                                                                     | -0.17482600 | 2.98121100  | 2.85259400  |
| H                                                                     | -0.11289600 | 3.03107600  | 1.76265700  |
| H                                                                     | -1.08932200 | 3.50231600  | 3.15245600  |
| C                                                                     | -2.77704900 | 1.22743100  | 2.20744500  |

|    |             |             |             |
|----|-------------|-------------|-------------|
| H  | -2.55169500 | 2.19463500  | 1.74099200  |
| C  | -3.41116100 | 1.50948100  | 3.58446300  |
| H  | -3.36910000 | 0.62076000  | 4.22803600  |
| H  | -2.91718700 | 2.32813800  | 4.11757500  |
| C  | -4.87149100 | 1.81120700  | 3.23872300  |
| H  | -5.53464700 | 1.78463700  | 4.10965900  |
| H  | -4.94497700 | 2.81146100  | 2.79257800  |
| C  | -5.20400500 | 0.74025000  | 2.19369100  |
| H  | -6.06655300 | 1.00354200  | 1.57357600  |
| H  | -5.44793400 | -0.19953200 | 2.70549300  |
| C  | -3.91024900 | 0.56977700  | 1.36551400  |
| H  | -3.98082200 | 1.07270200  | 0.39712900  |
| H  | -3.71972500 | -0.48298700 | 1.15080800  |
| C  | -0.25977100 | -0.48443100 | -3.65473900 |
| H  | -0.50425100 | -1.23761300 | -4.41236600 |
| C  | 1.02846700  | 0.21997500  | -4.12142000 |
| H  | 1.72960100  | -0.47795700 | -4.59256000 |
| H  | 1.53840400  | 0.70043400  | -3.28398800 |
| C  | 0.50757200  | 1.29612300  | -5.07852100 |
| H  | 1.25708200  | 2.06226600  | -5.30678200 |
| H  | 0.19321000  | 0.84418800  | -6.02933400 |
| C  | -0.70720500 | 1.85159600  | -4.32810800 |
| H  | -0.36117800 | 2.54416100  | -3.55067400 |
| H  | -1.40023100 | 2.40359700  | -4.97107400 |
| C  | -1.36302000 | 0.61535500  | -3.67440700 |
| H  | -2.22350500 | 0.27309400  | -4.26006200 |
| H  | -1.73444900 | 0.85167500  | -2.67207600 |
| C  | -1.67879500 | -2.50819000 | -2.29907000 |
| H  | -2.48357900 | -1.77449900 | -2.43981300 |
| C  | -2.09861800 | -3.43579200 | -1.11524800 |
| H  | -1.31959900 | -3.54571300 | -0.35918200 |
| H  | -2.96473800 | -3.00268700 | -0.60460900 |
| C  | -2.45380100 | -4.79912300 | -1.74329900 |
| H  | -1.59752500 | -5.48123400 | -1.66669300 |
| H  | -3.29908700 | -5.28318500 | -1.24402300 |
| C  | -2.72205700 | -4.48898900 | -3.21787300 |
| H  | -3.72626200 | -4.06142300 | -3.33795300 |
| H  | -2.65544400 | -5.36962600 | -3.86510300 |
| C  | -1.66622000 | -3.42843900 | -3.54052900 |
| H  | -1.88245000 | -2.89021500 | -4.46814400 |
| H  | -0.69072000 | -3.91672800 | -3.66071600 |
| C  | 1.27722300  | -2.52290400 | -2.24855800 |
| H  | 1.24639800  | -2.90559300 | -3.27549300 |
| C  | 2.63596100  | -1.79381700 | -2.01454300 |
| H  | 3.25617100  | -1.88589900 | -2.91404900 |
| H  | 2.52535300  | -0.72734400 | -1.81147100 |
| C  | 3.29974400  | -2.52566100 | -0.83758600 |
| H  | 4.39326400  | -2.46731900 | -0.86788900 |
| H  | 2.96633800  | -2.07985900 | 0.10924700  |
| C  | 2.76072800  | -3.95356700 | -0.94210200 |
| H  | 2.90507500  | -4.54251000 | -0.02989700 |
| H  | 3.25406600  | -4.48414300 | -1.76746900 |
| C  | 1.28174400  | -3.71865600 | -1.26347100 |
| H  | 0.77228900  | -3.44596700 | -0.33266700 |
| H  | 0.77427900  | -4.59793800 | -1.67373200 |
| P  | -1.12750800 | 0.37063000  | 2.19779500  |
| P  | -0.19013200 | -1.40573100 | -2.04243900 |
| Os | -0.39352800 | -0.26125400 | 0.02576500  |

|                                                                       |             |             |             |
|-----------------------------------------------------------------------|-------------|-------------|-------------|
| H                                                                     | 0.27873900  | −1.53979400 | 0.69214400  |
| H                                                                     | 0.06689400  | 3.83035900  | −0.76492500 |
| H                                                                     | −1.96223800 | −0.28630400 | −0.34048700 |
| H                                                                     | −1.25178100 | −1.53832700 | 0.38408700  |
| C                                                                     | −0.62647600 | 2.97778100  | −0.78245700 |
| O                                                                     | −0.00982200 | 1.80411100  | −0.75691400 |
| O                                                                     | −1.82676400 | 3.09514000  | −0.83560300 |
| C                                                                     | 3.37655200  | 2.41670300  | −1.33154600 |
| C                                                                     | 3.35388100  | 2.66692100  | 0.21497500  |
| H                                                                     | 1.34181000  | 0.34384300  | 0.17862400  |
| C                                                                     | 4.67354400  | 1.82115000  | −1.86623200 |
| H                                                                     | 4.59480100  | 1.67900400  | −2.94888700 |
| H                                                                     | 5.52187200  | 2.48689800  | −1.67235500 |
| H                                                                     | 4.88028700  | 0.84775800  | −1.41592000 |
| C                                                                     | 4.14023000  | 1.60270200  | 0.98752500  |
| H                                                                     | 5.21838700  | 1.70539000  | 0.82956100  |
| H                                                                     | 3.94138700  | 1.71836300  | 2.05635700  |
| H                                                                     | 3.84204300  | 0.59134400  | 0.69375500  |
| C                                                                     | 3.00646700  | 3.66086200  | −2.14416200 |
| H                                                                     | 3.80889700  | 4.40568700  | −2.13875500 |
| H                                                                     | 2.82083900  | 3.36381500  | −3.18073700 |
| H                                                                     | 2.09670300  | 4.13362100  | −1.76302900 |
| C                                                                     | 3.80902400  | 4.05567800  | 0.64027900  |
| H                                                                     | 3.81973500  | 4.12948900  | 1.73205500  |
| H                                                                     | 4.82502800  | 4.25497600  | 0.28204100  |
| H                                                                     | 3.14395600  | 4.83148300  | 0.25338900  |
| O                                                                     | 2.33605300  | 1.45227800  | −1.48836100 |
| O                                                                     | 1.96255200  | 2.51455900  | 0.51970300  |
| B                                                                     | 1.44150400  | 1.55535400  | −0.39037200 |
| TS <sub>7,8-Os</sub>                                                  |             |             |             |
| $G_{\text{solv}} = -2550.727641$ ; $E_{\text{solv}} = -2551.69064369$ |             |             |             |
| C                                                                     | −2.01358900 | −0.99618700 | 3.18106900  |
| H                                                                     | −2.25048000 | −0.51246300 | 4.13666800  |
| C                                                                     | −1.14178200 | −2.25556200 | 3.47553500  |
| H                                                                     | −0.23509000 | −2.28605900 | 2.86439200  |
| H                                                                     | −0.82269500 | −2.24925300 | 4.52348800  |
| C                                                                     | −2.04310900 | −3.47162500 | 3.17798100  |
| H                                                                     | −1.84418500 | −3.83581200 | 2.16279600  |
| H                                                                     | −1.86709600 | −4.30416100 | 3.86669500  |
| C                                                                     | −3.47127600 | −2.92335200 | 3.24556900  |
| H                                                                     | −3.79071500 | −2.82080000 | 4.29126000  |
| H                                                                     | −4.20107100 | −3.56071100 | 2.73527000  |
| C                                                                     | −3.33222100 | −1.54242300 | 2.59805600  |
| H                                                                     | −4.18090700 | −0.88039700 | 2.80029600  |
| H                                                                     | −3.25265800 | −1.66412500 | 1.51213600  |
| C                                                                     | 0.05806700  | 0.92560900  | 3.45868400  |
| H                                                                     | −0.47010200 | 0.89255900  | 4.42310100  |
| C                                                                     | 1.36262200  | 0.12145900  | 3.57666300  |
| H                                                                     | 1.22544800  | −0.85852800 | 4.04249800  |
| H                                                                     | 1.76645400  | −0.04444200 | 2.57095600  |
| C                                                                     | 2.29698200  | 1.03348000  | 4.39253300  |
| H                                                                     | 2.21737400  | 0.79619800  | 5.45920200  |
| H                                                                     | 3.34622300  | 0.88687100  | 4.11358100  |
| C                                                                     | 1.80935100  | 2.48161500  | 4.12795500  |
| H                                                                     | 2.58197400  | 3.09774500  | 3.65478100  |
| H                                                                     | 1.54834100  | 2.97422000  | 5.07084200  |
| C                                                                     | 0.56797500  | 2.35394200  | 3.22048400  |
| H                                                                     | 0.85698500  | 2.46931200  | 2.17164600  |

|   |             |             |             |
|---|-------------|-------------|-------------|
| H | -0.18651000 | 3.11567400  | 3.44472900  |
| C | -2.33421600 | 1.68695800  | 2.03072700  |
| H | -1.70793300 | 2.54245400  | 1.74482800  |
| C | -3.13505300 | 2.11026100  | 3.27107300  |
| H | -3.61193000 | 1.24224500  | 3.74370300  |
| H | -2.51592400 | 2.60482200  | 4.02727000  |
| C | -4.20963900 | 3.02181800  | 2.67011300  |
| H | -5.04065400 | 3.21608900  | 3.35596100  |
| H | -3.76280700 | 3.98869700  | 2.40677100  |
| C | -4.64811500 | 2.27783000  | 1.39695200  |
| H | -5.02496000 | 2.96010000  | 0.62997300  |
| H | -5.45861700 | 1.57979400  | 1.63742600  |
| C | -3.39840400 | 1.49426000  | 0.91825200  |
| H | -3.02596600 | 1.87508400  | -0.03834900 |
| H | -3.63999900 | 0.43844800  | 0.76867700  |
| C | -0.63475500 | -0.78378500 | -3.53302200 |
| H | -0.60223600 | -1.53382000 | -4.33205600 |
| C | 0.20985700  | 0.42819100  | -3.97110400 |
| H | 1.06699700  | 0.13142400  | -4.58498000 |
| H | 0.60403200  | 0.96627800  | -3.10605600 |
| C | -0.78419900 | 1.32451500  | -4.71524700 |
| H | -0.42285200 | 2.35257400  | -4.82330700 |
| H | -0.97802800 | 0.92681100  | -5.72100100 |
| C | -2.04442400 | 1.22786400  | -3.85080200 |
| H | -1.92910900 | 1.88375800  | -2.98153900 |
| H | -2.95453200 | 1.53340400  | -4.37707500 |
| C | -2.09335000 | -0.24640500 | -3.39827600 |
| H | -2.76665100 | -0.83287700 | -4.03328500 |
| H | -2.48016100 | -0.33169700 | -2.37412400 |
| C | -1.10590800 | -3.16408600 | -2.08291900 |
| H | -2.12464300 | -2.75781300 | -2.12886300 |
| C | -1.04810100 | -4.12884200 | -0.85932800 |
| H | -0.18972100 | -3.94126900 | -0.21080400 |
| H | -1.93711800 | -3.98072200 | -0.23879200 |
| C | -1.00895700 | -5.55612300 | -1.44508000 |
| H | 0.02458600  | -5.92467600 | -1.46770300 |
| H | -1.59273200 | -6.26870500 | -0.85391100 |
| C | -1.52147400 | -5.40439000 | -2.88079200 |
| H | -2.61731700 | -5.33447700 | -2.88606200 |
| H | -1.23789700 | -6.23829100 | -3.53136100 |
| C | -0.91594700 | -4.06805700 | -3.31969200 |
| H | -1.39221200 | -3.65961400 | -4.21648900 |
| H | 0.14785300  | -4.21311800 | -3.54668300 |
| C | 1.65077000  | -2.18762300 | -2.38053400 |
| H | 1.63181700  | -2.59356700 | -3.39978400 |
| C | 2.71029800  | -1.05273700 | -2.30706900 |
| H | 3.01055800  | -0.74908200 | -3.31493100 |
| H | 2.31216200  | -0.16102600 | -1.81708800 |
| C | 3.90641200  | -1.63779700 | -1.51978000 |
| H | 4.87315700  | -1.33633900 | -1.93716500 |
| H | 3.87516600  | -1.28631500 | -0.48043200 |
| C | 3.69586900  | -3.15511100 | -1.54439000 |
| H | 4.23007900  | -3.67695600 | -0.74351600 |
| H | 4.03606800  | -3.57183300 | -2.50170900 |
| C | 2.17604900  | -3.28280200 | -1.43044100 |
| H | 1.87550000  | -3.06283400 | -0.39796000 |
| H | 1.79932600  | -4.27861000 | -1.68593300 |
| P | -1.12459300 | 0.29171300  | 2.17306600  |

|                                                                       |             |             |             |
|-----------------------------------------------------------------------|-------------|-------------|-------------|
| P                                                                     | −0.06541400 | −1.62092300 | −1.98036300 |
| Os                                                                    | −0.41386400 | −0.46191800 | 0.05257700  |
| H                                                                     | 0.93165400  | −1.06161800 | 0.62069000  |
| H                                                                     | −0.39289500 | 4.22544300  | 0.36950500  |
| H                                                                     | −1.78385200 | −1.35067000 | 0.06480500  |
| H                                                                     | −0.45598600 | −1.90594200 | 0.70884000  |
| C                                                                     | −0.94439600 | 3.82352700  | −0.49396600 |
| O                                                                     | −0.27568700 | 2.91952300  | −1.20394300 |
| O                                                                     | −2.05984100 | 4.18258100  | −0.78784300 |
| C                                                                     | 3.20582900  | 2.88557200  | −1.49521100 |
| C                                                                     | 3.09126900  | 2.94902500  | 0.06551900  |
| H                                                                     | 0.66821600  | 0.89149700  | −0.28627300 |
| C                                                                     | 4.36490000  | 2.04953800  | −2.01262800 |
| H                                                                     | 4.33871900  | 2.01856400  | −3.10606100 |
| H                                                                     | 5.31874500  | 2.49340300  | −1.70776600 |
| H                                                                     | 4.32508600  | 1.02537600  | −1.64299900 |
| C                                                                     | 3.49438200  | 1.64164900  | 0.74781300  |
| H                                                                     | 4.57434200  | 1.47743200  | 0.68258900  |
| H                                                                     | 3.22313500  | 1.69788300  | 1.80460300  |
| H                                                                     | 2.97343100  | 0.78586400  | 0.31066500  |
| C                                                                     | 3.22773800  | 4.26931500  | −2.14910900 |
| H                                                                     | 4.17699900  | 4.78472300  | −1.97258400 |
| H                                                                     | 3.09590600  | 4.15114400  | −3.22847300 |
| H                                                                     | 2.41451500  | 4.90101100  | −1.77836500 |
| C                                                                     | 3.81026700  | 4.12338600  | 0.71023500  |
| H                                                                     | 3.67137600  | 4.09089800  | 1.79510000  |
| H                                                                     | 4.88503100  | 4.07559900  | 0.50522700  |
| H                                                                     | 3.42651600  | 5.07997300  | 0.34911200  |
| O                                                                     | 1.95699500  | 2.26455100  | −1.86579000 |
| O                                                                     | 1.66950400  | 3.12829300  | 0.24331300  |
| B                                                                     | 1.05447200  | 2.54635200  | −0.85359000 |
| <b>8Os</b>                                                            |             |             |             |
| $G_{\text{solv}} = -2550.738691$ ; $E_{\text{solv}} = -2551.70088119$ |             |             |             |
| C                                                                     | −1.93350800 | −1.16617200 | 3.41153000  |
| H                                                                     | −2.07515300 | −0.66928900 | 4.37879400  |
| C                                                                     | −0.98129300 | −2.38631900 | 3.61727900  |
| H                                                                     | −0.08815200 | −2.33576900 | 2.98845600  |
| H                                                                     | −0.64310200 | −2.41665600 | 4.65936300  |
| C                                                                     | −1.82239800 | −3.63254900 | 3.28789600  |
| H                                                                     | −1.71141800 | −3.87895700 | 2.22440700  |
| H                                                                     | −1.52010600 | −4.51002100 | 3.86899500  |
| C                                                                     | −3.26396600 | −3.19267800 | 3.55341700  |
| H                                                                     | −3.46234500 | −3.16927800 | 4.63369200  |
| H                                                                     | −4.00794400 | −3.84963100 | 3.09055200  |
| C                                                                     | −3.28373800 | −1.77517000 | 2.97377400  |
| H                                                                     | −4.13703900 | −1.17575100 | 3.30867700  |
| H                                                                     | −3.32767700 | −1.84796000 | 1.88185400  |
| C                                                                     | 0.01299300  | 0.92119600  | 3.36844800  |
| H                                                                     | −0.47860700 | 1.07667100  | 4.34049600  |
| C                                                                     | 1.31012800  | 0.12378900  | 3.58815300  |
| H                                                                     | 1.17565400  | −0.74035700 | 4.24420400  |
| H                                                                     | 1.66395300  | −0.24714000 | 2.61837100  |
| C                                                                     | 2.30880800  | 1.15014900  | 4.16900500  |
| H                                                                     | 2.37350100  | 1.05325200  | 5.25787600  |
| H                                                                     | 3.31829400  | 0.98248400  | 3.77778100  |
| C                                                                     | 1.75549300  | 2.54548200  | 3.78117600  |
| H                                                                     | 2.50177300  | 3.17711300  | 3.28723200  |
| H                                                                     | 1.42681900  | 3.08503400  | 4.67663500  |

|   |             |             |             |
|---|-------------|-------------|-------------|
| C | 0.55111600  | 2.26721600  | 2.86771100  |
| H | 0.88788100  | 2.14921100  | 1.83096900  |
| H | -0.18939000 | 3.07403600  | 2.89967700  |
| C | -2.54010500 | 1.44480400  | 2.18192900  |
| H | -2.00685600 | 2.30118600  | 1.75182700  |
| C | -3.16918300 | 1.91739700  | 3.50629600  |
| H | -3.41836300 | 1.06595000  | 4.15197400  |
| H | -2.50463300 | 2.57897300  | 4.07235900  |
| C | -4.46225700 | 2.60095400  | 3.05145800  |
| H | -5.17137000 | 2.76551300  | 3.86962500  |
| H | -4.22845500 | 3.57789800  | 2.60875900  |
| C | -4.99606800 | 1.64865100  | 1.97449900  |
| H | -5.71161600 | 2.12793100  | 1.29951400  |
| H | -5.51458800 | 0.81060600  | 2.45718200  |
| C | -3.73912300 | 1.13698900  | 1.23576200  |
| H | -3.59484100 | 1.66535200  | 0.28813800  |
| H | -3.82586200 | 0.07440900  | 0.99638500  |
| C | -0.54735300 | -0.82431700 | -3.45013900 |
| H | -0.37720600 | -1.50165300 | -4.29618200 |
| C | 0.29981300  | 0.44339000  | -3.66317400 |
| H | 1.27437800  | 0.22920700  | -4.11237400 |
| H | 0.48041200  | 0.94024000  | -2.70464600 |
| C | -0.58894000 | 1.33678500  | -4.53007700 |
| H | -0.25801600 | 2.38017100  | -4.53554400 |
| H | -0.59079900 | 0.97548400  | -5.56777700 |
| C | -1.97179500 | 1.15598100  | -3.89623300 |
| H | -2.04451900 | 1.79749600  | -3.01090200 |
| H | -2.79224600 | 1.43148400  | -4.56668700 |
| C | -2.02611800 | -0.33121200 | -3.47795100 |
| H | -2.60735100 | -0.92674800 | -4.19026600 |
| H | -2.51875300 | -0.44391600 | -2.50332800 |
| C | -1.18086600 | -3.28889600 | -2.18354700 |
| H | -2.18957400 | -2.87610100 | -2.31281800 |
| C | -1.24412900 | -4.29959600 | -0.99781900 |
| H | -0.45412600 | -4.13819900 | -0.26176900 |
| H | -2.18813700 | -4.17163700 | -0.45987500 |
| C | -1.14390000 | -5.70246400 | -1.63392600 |
| H | -0.11186300 | -6.07073700 | -1.56917500 |
| H | -1.78106400 | -6.43794800 | -1.13266300 |
| C | -1.51191900 | -5.49350000 | -3.10669600 |
| H | -2.60190400 | -5.41992000 | -3.21761200 |
| H | -1.16489800 | -6.30239800 | -3.75827100 |
| C | -0.86642400 | -4.14263500 | -3.42967200 |
| H | -1.24823400 | -3.69473600 | -4.35289600 |
| H | 0.21500400  | -4.28345000 | -3.55272700 |
| C | 1.59200500  | -2.31256200 | -2.16226200 |
| H | 1.66123800  | -2.69007000 | -3.18947100 |
| C | 2.63950200  | -1.17416300 | -1.97560500 |
| H | 3.13888300  | -0.97063300 | -2.92942900 |
| H | 2.17680500  | -0.23979800 | -1.64835900 |
| C | 3.64576200  | -1.69906200 | -0.93437400 |
| H | 4.66080100  | -1.31855400 | -1.09467600 |
| H | 3.32976900  | -1.38981600 | 0.07055000  |
| C | 3.54317000  | -3.22205100 | -1.04357200 |
| H | 3.96284000  | -3.74696500 | -0.17893400 |
| H | 4.06809400  | -3.57636400 | -1.94098000 |
| C | 2.03451500  | -3.43194600 | -1.19227300 |
| H | 1.56528600  | -3.29020400 | -0.21110800 |

|                                                                       |             |             |             |
|-----------------------------------------------------------------------|-------------|-------------|-------------|
| H                                                                     | 1.76051000  | −4.42899700 | −1.55270400 |
| P                                                                     | −1.24108800 | 0.11790400  | 2.25628900  |
| P                                                                     | −0.15860600 | −1.76030100 | −1.89883200 |
| Os                                                                    | −0.63373400 | −0.68058300 | 0.13688400  |
| H                                                                     | 0.79482700  | −1.11648500 | 0.66527300  |
| H                                                                     | −0.30567700 | 3.15682700  | 0.38595800  |
| H                                                                     | −2.04634400 | −1.57631100 | 0.13363800  |
| H                                                                     | −0.50836700 | −2.11039600 | 0.80960600  |
| C                                                                     | −0.71762200 | 3.22054700  | −0.62919200 |
| O                                                                     | 0.20647900  | 3.21751500  | −1.60432700 |
| O                                                                     | −1.89331300 | 3.29742700  | −0.87340500 |
| C                                                                     | 3.77199500  | 3.04805700  | −1.68112300 |
| C                                                                     | 3.48255000  | 3.05696200  | −0.13350000 |
| H                                                                     | 0.46258200  | 0.59202500  | −0.14657100 |
| C                                                                     | 4.73282700  | 1.96320100  | −2.13673500 |
| H                                                                     | 4.86178400  | 2.01714900  | −3.22160300 |
| H                                                                     | 5.71398200  | 2.10008800  | −1.67029300 |
| H                                                                     | 4.36101300  | 0.96864500  | −1.88727100 |
| C                                                                     | 3.55749300  | 1.67272500  | 0.50491700  |
| H                                                                     | 4.58319600  | 1.29293900  | 0.50847500  |
| H                                                                     | 3.21481200  | 1.73920900  | 1.53961900  |
| H                                                                     | 2.91263700  | 0.95745000  | −0.01035600 |
| C                                                                     | 4.20517600  | 4.40853000  | −2.22467700 |
| H                                                                     | 5.21576200  | 4.66674100  | −1.89511400 |
| H                                                                     | 4.20006200  | 4.37065800  | −3.31759500 |
| H                                                                     | 3.52286700  | 5.20502200  | −1.91181400 |
| C                                                                     | 4.31143400  | 4.05397900  | 0.65867600  |
| H                                                                     | 4.04825500  | 3.99258000  | 1.71839700  |
| H                                                                     | 5.37752500  | 3.82333000  | 0.56278200  |
| H                                                                     | 4.14355900  | 5.08020800  | 0.32598100  |
| O                                                                     | 2.46202900  | 2.77221300  | −2.24371800 |
| O                                                                     | 2.08680900  | 3.46837500  | −0.08707100 |
| B                                                                     | 1.55723700  | 3.13815400  | −1.29964200 |
| <b>9Os</b>                                                            |             |             |             |
| $G_{\text{solv}} = -2550.735469$ ; $E_{\text{solv}} = -2551.69979891$ |             |             |             |
| C                                                                     | −2.56616200 | −1.13716400 | 2.80083800  |
| H                                                                     | −2.60878200 | −1.37977400 | 3.87100400  |
| C                                                                     | −3.12021400 | −2.35305400 | 2.00217500  |
| H                                                                     | −2.51081200 | −2.55840100 | 1.11842700  |
| H                                                                     | −3.10188200 | −3.25359100 | 2.62369000  |
| C                                                                     | −4.56617200 | −1.97692300 | 1.59941300  |
| H                                                                     | −4.59164400 | −1.69072500 | 0.54143400  |
| H                                                                     | −5.26752400 | −2.80734200 | 1.72867300  |
| C                                                                     | −4.92013300 | −0.76169100 | 2.46420500  |
| H                                                                     | −5.23256800 | −1.08269600 | 3.46693500  |
| H                                                                     | −5.72711600 | −0.15249500 | 2.04320200  |
| C                                                                     | −3.58924700 | −0.01214300 | 2.55501700  |
| H                                                                     | −3.57051500 | 0.75314600  | 3.33784500  |
| H                                                                     | −3.40187800 | 0.48749000  | 1.59796200  |
| C                                                                     | 0.05955300  | −1.91992800 | 3.60105400  |
| H                                                                     | −0.36411600 | −1.70966200 | 4.59108400  |
| C                                                                     | −0.17577800 | −3.41294500 | 3.27500400  |
| H                                                                     | −1.08333700 | −3.79930200 | 3.74987300  |
| H                                                                     | −0.27680200 | −3.55336400 | 2.19304500  |
| C                                                                     | 1.09749800  | −4.11401100 | 3.76045400  |
| H                                                                     | 1.07594300  | −4.23006900 | 4.85263100  |
| H                                                                     | 1.22661100  | −5.10890000 | 3.32120100  |
| C                                                                     | 2.19972400  | −3.13168400 | 3.35795800  |

|   |             |             |             |
|---|-------------|-------------|-------------|
| H | 2.38187700  | −3.21807200 | 2.27936300  |
| H | 3.15078400  | −3.30997700 | 3.87078000  |
| C | 1.60699400  | −1.74670900 | 3.67343600  |
| H | 1.98169600  | −0.99045200 | 2.97728800  |
| H | 1.89426300  | −1.42848200 | 4.68238300  |
| C | −0.44148800 | 0.85279300  | 3.33007500  |
| H | 0.65668200  | 0.87743100  | 3.34680100  |
| C | −0.94850600 | 0.99805700  | 4.79180000  |
| H | −1.79392900 | 0.33730900  | 5.00870500  |
| H | −0.15486300 | 0.73028400  | 5.49711600  |
| C | −1.36437400 | 2.48239800  | 4.94752000  |
| H | −2.45760900 | 2.56802400  | 4.92110700  |
| H | −1.03140100 | 2.91467600  | 5.89630500  |
| C | −0.77263700 | 3.19705300  | 3.72387600  |
| H | 0.28381600  | 3.44189500  | 3.89981500  |
| H | −1.29539900 | 4.12981500  | 3.48404600  |
| C | −0.88081600 | 2.14444700  | 2.61792200  |
| H | −0.26988300 | 2.35307000  | 1.73761300  |
| H | −1.92325500 | 2.08576100  | 2.28352200  |
| C | 0.98408700  | −0.50647300 | −3.32886300 |
| H | 1.75267700  | −0.86633400 | −4.02706100 |
| C | 1.01809300  | 1.02745200  | −3.35813000 |
| H | 2.03467000  | 1.43100600  | −3.32081400 |
| H | 0.47283200  | 1.42461600  | −2.49446300 |
| C | 0.29493200  | 1.36938000  | −4.66446400 |
| H | −0.06043300 | 2.40409100  | −4.68995300 |
| H | 0.98748700  | 1.23084200  | −5.50494400 |
| C | −0.85506800 | 0.34837200  | −4.74811400 |
| H | −1.77038300 | 0.78116500  | −4.33368900 |
| H | −1.06990200 | 0.06515800  | −5.78366300 |
| C | −0.41176800 | −0.86624000 | −3.89066300 |
| H | −0.37192500 | −1.79252800 | −4.47378500 |
| H | −1.12058300 | −1.02920500 | −3.07253100 |
| C | 1.34549100  | −3.08297100 | −2.21853400 |
| H | 0.30725700  | −3.22863100 | −2.54353300 |
| C | 1.63296400  | −4.13187700 | −1.10103300 |
| H | 2.06603400  | −3.68729300 | −0.20343000 |
| H | 0.69307300  | −4.59200500 | −0.78256700 |
| C | 2.58404500  | −5.17080800 | −1.73097500 |
| H | 3.62292200  | −4.94245900 | −1.45892600 |
| H | 2.37749600  | −6.19081100 | −1.39109000 |
| C | 2.41057800  | −4.99436200 | −3.24291600 |
| H | 1.48929600  | −5.48911200 | −3.57804400 |
| H | 3.24121900  | −5.40714200 | −3.82535200 |
| C | 2.26640700  | −3.47722800 | −3.39231000 |
| H | 1.85857100  | −3.17939500 | −4.36384400 |
| H | 3.25569600  | −3.01145500 | −3.29189900 |
| C | 3.14207000  | −0.85690500 | −1.48685400 |
| H | 3.61496500  | −1.01697200 | −2.46346500 |
| C | 3.37559500  | 0.62789600  | −1.06224400 |
| H | 3.88295300  | 1.16610500  | −1.87096500 |
| H | 2.43975600  | 1.15301000  | −0.85167700 |
| C | 4.27292300  | 0.57182400  | 0.18746600  |
| H | 4.94677900  | 1.43206700  | 0.26110200  |
| H | 3.64638100  | 0.56128900  | 1.08866200  |
| C | 5.00603800  | −0.76637500 | 0.06750000  |
| H | 5.44716800  | −1.10412600 | 1.01139200  |
| H | 5.81326100  | −0.69252500 | −0.67387400 |

|                                                                       |             |             |             |
|-----------------------------------------------------------------------|-------------|-------------|-------------|
| C                                                                     | 3.90203600  | −1.69882900 | −0.43790500 |
| H                                                                     | 3.24347300  | −1.94244400 | 0.40268900  |
| H                                                                     | 4.27779300  | −2.63989200 | −0.85357800 |
| P                                                                     | −0.77971400 | −0.73914700 | 2.43007100  |
| P                                                                     | 1.34361600  | −1.29889200 | −1.68837500 |
| Os                                                                    | 0.06485000  | −0.87842500 | 0.24003100  |
| H                                                                     | 1.39758800  | −0.26261700 | 0.86475600  |
| H                                                                     | 0.19590700  | 0.80324600  | 0.00135700  |
| H                                                                     | −0.47753000 | −2.45872200 | 0.15627700  |
| H                                                                     | 1.09260300  | −1.90739600 | 0.87589200  |
| C                                                                     | −1.01809100 | 4.91768600  | −2.27110900 |
| C                                                                     | −0.54162100 | 4.60283300  | −0.80355700 |
| C                                                                     | 0.06128600  | 5.48685600  | −3.17680100 |
| H                                                                     | −0.34948200 | 5.66049300  | −4.17547900 |
| H                                                                     | 0.42269200  | 6.44396500  | −2.78661800 |
| H                                                                     | 0.90843000  | 4.80496600  | −3.27244100 |
| C                                                                     | 0.92659300  | 4.18679700  | −0.71772800 |
| H                                                                     | 1.59032500  | 5.04042200  | −0.88347600 |
| H                                                                     | 1.12243500  | 3.78166700  | 0.27873300  |
| H                                                                     | 1.17076900  | 3.40804000  | −1.44627900 |
| C                                                                     | −2.27785700 | 5.77868900  | −2.32710300 |
| H                                                                     | −2.06765100 | 6.80919400  | −2.02649600 |
| H                                                                     | −2.65450300 | 5.79116600  | −3.35364600 |
| H                                                                     | −3.06776300 | 5.38218000  | −1.68169900 |
| C                                                                     | −0.84902600 | 5.68378600  | 0.21763300  |
| H                                                                     | −0.49034100 | 5.36889300  | 1.20186600  |
| H                                                                     | −0.33881400 | 6.61536400  | −0.04746900 |
| H                                                                     | −1.92064300 | 5.87921900  | 0.29246700  |
| O                                                                     | −1.38406700 | 3.60021200  | −2.76859000 |
| O                                                                     | −1.32318400 | 3.42068400  | −0.48085200 |
| B                                                                     | −1.59707600 | 2.82783200  | −1.67462800 |
| O                                                                     | −2.02157300 | 1.51212500  | −1.79881700 |
| C                                                                     | −2.00734700 | 0.72151200  | −0.71968700 |
| H                                                                     | −2.07447500 | 1.24330800  | 0.23867800  |
| O                                                                     | −2.03951200 | −0.49353500 | −0.83931400 |
| <b>TS<sub>9,10-Os</sub></b>                                           |             |             |             |
| $G_{\text{solv}} = -2550.733888$ ; $E_{\text{solv}} = -2551.69862618$ |             |             |             |
| C                                                                     | 10.60721400 | 4.25349500  | 7.98153500  |
| H                                                                     | 10.56131700 | 4.00312200  | 9.04990100  |
| C                                                                     | 10.09893700 | 3.02648100  | 7.16959400  |
| H                                                                     | 10.71602400 | 2.85287500  | 6.28436500  |
| H                                                                     | 10.14819600 | 2.12064900  | 7.78165000  |
| C                                                                     | 8.64143000  | 3.35567500  | 6.76605100  |
| H                                                                     | 8.60780900  | 3.64023800  | 5.70835800  |
| H                                                                     | 7.96765600  | 2.50293900  | 6.89675100  |
| C                                                                     | 8.24702500  | 4.55954900  | 7.62955500  |
| H                                                                     | 7.93797300  | 4.22943100  | 8.63044700  |
| H                                                                     | 7.42528400  | 5.14474200  | 7.20330100  |
| C                                                                     | 9.55429900  | 5.34869000  | 7.72850400  |
| H                                                                     | 9.54533600  | 6.11373800  | 8.51187600  |
| H                                                                     | 9.73445300  | 5.85081900  | 6.77155300  |
| C                                                                     | 13.25575200 | 3.53986600  | 8.78251400  |
| H                                                                     | 12.82825700 | 3.73116300  | 9.77461300  |
| C                                                                     | 13.06079500 | 2.04290300  | 8.44875900  |
| H                                                                     | 12.16813200 | 1.62858700  | 8.92801900  |
| H                                                                     | 12.95511100 | 1.90453900  | 7.36729600  |
| C                                                                     | 14.35670700 | 1.37512000  | 8.92135800  |
| H                                                                     | 14.34411500 | 1.24878900  | 10.01245900 |

|   |             |             |             |
|---|-------------|-------------|-------------|
| H | 14.51216700 | 0.38825500  | 8.47271300  |
| C | 15.42822100 | 2.39216400  | 8.52246400  |
| H | 15.60733200 | 2.32110600  | 7.44234000  |
| H | 16.38657900 | 2.23659000  | 9.02906900  |
| C | 14.79767700 | 3.75653400  | 8.85332100  |
| H | 15.14890800 | 4.53032400  | 8.16435300  |
| H | 15.07810700 | 4.07208100  | 9.86498500  |
| C | 12.67526100 | 6.29720100  | 8.54664000  |
| H | 13.77257600 | 6.35020200  | 8.56649800  |
| C | 12.16240000 | 6.41161900  | 10.00821600 |
| H | 11.31572900 | 5.74613700  | 10.20498300 |
| H | 12.95189400 | 6.12924300  | 10.71237100 |
| C | 11.74325200 | 7.89268300  | 10.19090200 |
| H | 10.64950100 | 7.97376200  | 10.18575500 |
| H | 12.09170300 | 8.31301600  | 11.13944800 |
| C | 12.31096500 | 8.62843200  | 8.96765700  |
| H | 13.36605400 | 8.88574800  | 9.13342800  |
| H | 11.77326600 | 9.55635200  | 8.74381000  |
| C | 12.20427300 | 7.58620400  | 7.85180800  |
| H | 12.79744700 | 7.81668000  | 6.96440800  |
| H | 11.15714100 | 7.51110700  | 7.53561000  |
| C | 14.13886100 | 4.95275100  | 1.83643300  |
| H | 14.87504600 | 4.53174400  | 1.13814700  |
| C | 14.26475200 | 6.48031900  | 1.75984300  |
| H | 15.30572600 | 6.81810000  | 1.75220000  |
| H | 13.77344500 | 6.93963000  | 2.62417400  |
| C | 13.52150200 | 6.82804800  | 0.46642400  |
| H | 13.23084000 | 7.88204900  | 0.41853000  |
| H | 14.17499300 | 6.61884700  | −0.39084100 |
| C | 12.30750400 | 5.88200500  | 0.45495600  |
| H | 11.44685000 | 6.37801400  | 0.91282200  |
| H | 12.01995100 | 5.60279800  | −0.56389700 |
| C | 12.71618900 | 4.65156300  | 1.30621200  |
| H | 12.70840800 | 3.72443200  | 0.72268000  |
| H | 12.01715200 | 4.51789200  | 2.13767300  |
| C | 14.45937200 | 2.39263500  | 2.98683100  |
| H | 13.41483600 | 2.25783700  | 2.67747300  |
| C | 14.75034600 | 1.35161100  | 4.11195900  |
| H | 15.17229900 | 1.80315200  | 5.01103900  |
| H | 13.81257700 | 0.88217600  | 4.42389000  |
| C | 15.71009200 | 0.31603600  | 3.49188300  |
| H | 16.74861300 | 0.56537600  | 3.74610200  |
| H | 15.52320300 | −0.69997800 | 3.85423600  |
| C | 15.51403200 | 0.46222700  | 1.98008200  |
| H | 14.59058200 | −0.04380400 | 1.66853600  |
| H | 16.33813800 | 0.04311000  | 1.39299100  |
| C | 15.35993500 | 1.97547900  | 1.80390700  |
| H | 14.93204800 | 2.25065100  | 0.83454400  |
| H | 16.34883600 | 2.44759300  | 1.87489500  |
| C | 16.28960100 | 4.61227900  | 3.68321000  |
| H | 16.75311100 | 4.45551100  | 2.70154200  |
| C | 16.53307100 | 6.09359900  | 4.11501900  |
| H | 17.04814200 | 6.63167300  | 3.31127100  |
| H | 15.60120700 | 6.62714600  | 4.32247000  |
| C | 17.42577300 | 6.02529100  | 5.36678600  |
| H | 18.09924000 | 6.88487000  | 5.45063700  |
| H | 16.79719000 | 6.00483400  | 6.26629500  |
| C | 18.15890000 | 4.68846000  | 5.23370900  |

|                                                                    |             |             |            |
|--------------------------------------------------------------------|-------------|-------------|------------|
| H                                                                  | 18.60044800 | 4.34154400  | 6.17405200 |
| H                                                                  | 18.96571300 | 4.76959400  | 4.49268800 |
| C                                                                  | 17.05442400 | 3.76071600  | 4.72055000 |
| H                                                                  | 16.39974800 | 3.50675900  | 5.56060600 |
| H                                                                  | 17.42972000 | 2.82474300  | 4.29366500 |
| P                                                                  | 12.38052700 | 4.70910300  | 7.62809700 |
| P                                                                  | 14.48626400 | 4.18550100  | 3.48988300 |
| Os                                                                 | 13.21108100 | 4.62480800  | 5.42749700 |
| H                                                                  | 14.49320500 | 5.37756100  | 6.03099900 |
| H                                                                  | 13.13707400 | 6.30662200  | 5.06982000 |
| H                                                                  | 12.82269600 | 3.01436000  | 5.41212500 |
| H                                                                  | 14.33691400 | 3.70112400  | 6.07437200 |
| C                                                                  | 12.24182700 | 10.33671400 | 2.88668200 |
| C                                                                  | 12.78120400 | 10.07416200 | 4.34230800 |
| C                                                                  | 13.26448500 | 10.93168300 | 1.93217900 |
| H                                                                  | 12.81321400 | 11.06572000 | 0.94483100 |
| H                                                                  | 13.59800800 | 11.91171300 | 2.28923100 |
| H                                                                  | 14.13662400 | 10.28428600 | 1.82074000 |
| C                                                                  | 14.26936200 | 9.72681600  | 4.38518700 |
| H                                                                  | 14.88955100 | 10.60560300 | 4.18519000 |
| H                                                                  | 14.51545900 | 9.34765900  | 5.38086200 |
| H                                                                  | 14.52395400 | 8.94827300  | 3.65978700 |
| C                                                                  | 10.94746400 | 11.14715400 | 2.85995400 |
| H                                                                  | 11.12590400 | 12.19155800 | 3.13200400 |
| H                                                                  | 10.53339600 | 11.12184500 | 1.84814200 |
| H                                                                  | 10.19852100 | 10.73254100 | 3.54179500 |
| C                                                                  | 12.46204400 | 11.16504600 | 5.35025800 |
| H                                                                  | 12.87109500 | 10.89324400 | 6.32749700 |
| H                                                                  | 12.91596700 | 12.11306300 | 5.04403300 |
| H                                                                  | 11.38587100 | 11.31207800 | 5.46186700 |
| O                                                                  | 11.91306300 | 8.99890100  | 2.43028100 |
| O                                                                  | 12.06667900 | 8.86836900  | 4.71670500 |
| B                                                                  | 11.76150600 | 8.23586600  | 3.54680600 |
| O                                                                  | 11.36274600 | 6.92082000  | 3.46286400 |
| C                                                                  | 11.33638400 | 6.14487400  | 4.57563400 |
| H                                                                  | 11.07464700 | 6.68614600  | 5.48791200 |
| O                                                                  | 11.17343300 | 4.91994900  | 4.44051800 |
| <b>10<sub>Os</sub></b>                                             |             |             |            |
| $G_{\text{solv}} = -2550.739209; E_{\text{solv}} = -2551.71049320$ |             |             |            |
| C                                                                  | -2.64408400 | -1.29878800 | 2.77509100 |
| H                                                                  | -2.73584600 | -1.56587000 | 3.83610900 |
| C                                                                  | -3.08126200 | -2.52530200 | 1.91797300 |
| H                                                                  | -2.37776500 | -2.72467900 | 1.10562400 |
| H                                                                  | -3.12233900 | -3.42300400 | 2.54342700 |
| C                                                                  | -4.47422200 | -2.17129100 | 1.35116600 |
| H                                                                  | -4.36551400 | -1.82265800 | 0.31859800 |
| H                                                                  | -5.15520700 | -3.02848500 | 1.34702900 |
| C                                                                  | -4.97345300 | -1.01491800 | 2.22309700 |
| H                                                                  | -5.37120800 | -1.39295900 | 3.17485100 |
| H                                                                  | -5.75985200 | -0.42301500 | 1.74316100 |
| C                                                                  | -3.69483500 | -0.21244000 | 2.47329600 |
| H                                                                  | -3.78590100 | 0.51949300  | 3.28287800 |
| H                                                                  | -3.43702000 | 0.32571900  | 1.55587100 |
| C                                                                  | 0.00038900  | -1.98966700 | 3.63902500 |
| H                                                                  | -0.45639200 | -1.84210100 | 4.62549000 |
| C                                                                  | -0.15171700 | -3.47889400 | 3.24966800 |
| H                                                                  | -1.04444300 | -3.93018300 | 3.69348900 |
| H                                                                  | -0.23186800 | -3.58472000 | 2.16240800 |

|   |             |             |             |
|---|-------------|-------------|-------------|
| C | 1.15076400  | −4.13187000 | 3.72468700  |
| H | 1.11951900  | −4.29763600 | 4.80996100  |
| H | 1.33927700  | −5.09777600 | 3.24447100  |
| C | 2.20400100  | −3.07532500 | 3.38450900  |
| H | 2.40402300  | −3.10056200 | 2.30580300  |
| H | 3.15683000  | −3.22731300 | 3.90220500  |
| C | 1.53462200  | −1.74049000 | 3.75521500  |
| H | 1.88359600  | −0.93094400 | 3.10734600  |
| H | 1.78349000  | −1.46101400 | 4.78532100  |
| C | −0.62107900 | 0.76907000  | 3.46109000  |
| H | 0.47397600  | 0.82466500  | 3.53226100  |
| C | −1.19984800 | 0.84976800  | 4.89949100  |
| H | −2.06748100 | 0.19570100  | 5.03229500  |
| H | −0.45094100 | 0.52958700  | 5.63103500  |
| C | −1.60179400 | 2.33305300  | 5.10686400  |
| H | −2.69353400 | 2.43097600  | 5.07912800  |
| H | −1.26902600 | 2.72464000  | 6.07300900  |
| C | −0.99235300 | 3.09073200  | 3.91724800  |
| H | 0.05779900  | 3.33964000  | 4.12130100  |
| H | −1.51733400 | 4.02567900  | 3.69420700  |
| C | −1.06671300 | 2.07351600  | 2.77632100  |
| H | −0.44077100 | 2.33181700  | 1.91768100  |
| H | −2.10171200 | 2.00401200  | 2.42340000  |
| C | 0.82758600  | −0.54289500 | −3.33520800 |
| H | 1.51188000  | −1.02537900 | −4.04574300 |
| C | 0.99199800  | 0.97221000  | −3.51601000 |
| H | 2.04000100  | 1.27191300  | −3.61793900 |
| H | 0.57908600  | 1.50172200  | −2.65288100 |
| C | 0.16541700  | 1.26820400  | −4.77132100 |
| H | −0.10184200 | 2.32627000  | −4.85708700 |
| H | 0.75097300  | 0.99571400  | −5.65969900 |
| C | −1.06985000 | 0.35885600  | −4.64276100 |
| H | −1.87871300 | 0.90209400  | −4.14646200 |
| H | −1.44004800 | 0.03724300  | −5.62178000 |
| C | −0.63260500 | −0.83799500 | −3.75883400 |
| H | −0.69267300 | −1.79139300 | −4.29591600 |
| H | −1.27939800 | −0.91117400 | −2.87896200 |
| C | 1.27100600  | −3.03371600 | −2.08000400 |
| H | 0.22316700  | −3.21483900 | −2.35226900 |
| C | 1.63172700  | −4.01661400 | −0.92262800 |
| H | 2.05555500  | −3.51365900 | −0.05235900 |
| H | 0.72229800  | −4.51514900 | −0.57220700 |
| C | 2.62042100  | −5.03513300 | −1.52348600 |
| H | 3.65255000  | −4.72718600 | −1.31129900 |
| H | 2.49109100  | −6.04022300 | −1.10979800 |
| C | 2.37417600  | −4.96644000 | −3.03278800 |
| H | 1.46437900  | −5.52394100 | −3.29217900 |
| H | 3.19767700  | −5.37739900 | −3.62616000 |
| C | 2.15084600  | −3.47066400 | −3.27253600 |
| H | 1.67978800  | −3.26154000 | −4.23788500 |
| H | 3.12003400  | −2.95437000 | −3.25825400 |
| C | 3.03904400  | −0.71315400 | −1.52211800 |
| H | 3.48834200  | −0.86864400 | −2.51065000 |
| C | 3.21629100  | 0.78689600  | −1.12501600 |
| H | 3.66464300  | 1.34044800  | −1.95708800 |
| H | 2.26424300  | 1.27235800  | −0.88980000 |
| C | 4.15965000  | 0.79245200  | 0.09175200  |
| H | 4.79676700  | 1.68263900  | 0.12496400  |

|                                                                    |             |             |             |
|--------------------------------------------------------------------|-------------|-------------|-------------|
| H                                                                  | 3.56946600  | 0.76974500  | 1.01675300  |
| C                                                                  | 4.94665000  | −0.51420900 | −0.03573300 |
| H                                                                  | 5.43750900  | −0.81583700 | 0.89552000  |
| H                                                                  | 5.72126800  | −0.41796800 | −0.80849600 |
| C                                                                  | 3.86665000  | −1.50221900 | −0.48435400 |
| H                                                                  | 3.24822300  | −1.75408400 | 0.38372200  |
| H                                                                  | 4.26612300  | −2.43564900 | −0.89432400 |
| P                                                                  | −0.87304400 | −0.80352400 | 2.50583800  |
| P                                                                  | 1.25357400  | −1.21796000 | −1.66173900 |
| Os                                                                 | −0.00645000 | −0.80483700 | 0.31427800  |
| H                                                                  | 1.29244900  | −0.07175500 | 0.93043900  |
| H                                                                  | −0.54759900 | 0.98357700  | −0.04274000 |
| H                                                                  | −0.21576600 | −2.39397700 | 0.33728200  |
| H                                                                  | 1.16341000  | −1.68462000 | 0.94073700  |
| C                                                                  | −0.86056500 | 4.94147300  | −2.29621300 |
| C                                                                  | 0.00073600  | 4.60355300  | −1.02277600 |
| C                                                                  | −0.08852400 | 5.60976100  | −3.42330600 |
| H                                                                  | −0.75825100 | 5.79889100  | −4.26747200 |
| H                                                                  | 0.32039000  | 6.57032200  | −3.09237900 |
| H                                                                  | 0.73241000  | 4.98289500  | −3.77738200 |
| C                                                                  | 1.46142100  | 4.28813600  | −1.34583900 |
| H                                                                  | 2.00946400  | 5.19070300  | −1.63310900 |
| H                                                                  | 1.93779700  | 3.86581600  | −0.45639200 |
| H                                                                  | 1.54778100  | 3.55790100  | −2.15538900 |
| C                                                                  | −2.12137200 | 5.74196100  | −1.96925500 |
| H                                                                  | −1.88101800 | 6.76938300  | −1.68010600 |
| H                                                                  | −2.76104900 | 5.77435700  | −2.85573200 |
| H                                                                  | −2.69211700 | 5.27713000  | −1.15924900 |
| C                                                                  | −0.07707100 | 5.63166600  | 0.09502700  |
| H                                                                  | 0.54519900  | 5.30780700  | 0.93474500  |
| H                                                                  | 0.29324000  | 6.60359800  | −0.24758100 |
| H                                                                  | −1.09883000 | 5.75428000  | 0.46018700  |
| O                                                                  | −1.29280700 | 3.63494300  | −2.73964500 |
| O                                                                  | −0.60752100 | 3.37618000  | −0.56225100 |
| B                                                                  | −1.23325800 | 2.80674000  | −1.64848500 |
| O                                                                  | −1.72948900 | 1.54486200  | −1.65417100 |
| C                                                                  | −1.67072200 | 0.78288500  | −0.44993700 |
| H                                                                  | −2.27933200 | 1.30854500  | 0.30303500  |
| O                                                                  | −1.94382900 | −0.49244900 | −0.61443100 |
| <b>11os</b>                                                        |             |             |             |
| $G_{\text{solv}} = -2550.749614; E_{\text{solv}} = -2551.72264469$ |             |             |             |
| C                                                                  | −2.53972000 | −1.33493800 | 2.61446300  |
| H                                                                  | −2.75949100 | −1.09684400 | 3.66251500  |
| C                                                                  | −2.27584300 | −2.86995000 | 2.49120300  |
| H                                                                  | −1.28460300 | −3.10049100 | 2.09531100  |
| H                                                                  | −2.34519000 | −3.33324400 | 3.48213300  |
| C                                                                  | −3.37277700 | −3.41431400 | 1.55992100  |
| H                                                                  | −3.01864100 | −3.38515100 | 0.52147400  |
| H                                                                  | −3.64586100 | −4.44904000 | 1.79303100  |
| C                                                                  | −4.52705900 | −2.42553500 | 1.72233600  |
| H                                                                  | −5.04963800 | −2.60476600 | 2.67233300  |
| H                                                                  | −5.26564100 | −2.48762300 | 0.91627200  |
| C                                                                  | −3.80421000 | −1.07660000 | 1.75483300  |
| H                                                                  | −4.42442900 | −0.27202500 | 2.16191900  |
| H                                                                  | −3.51568700 | −0.79504100 | 0.73492700  |
| C                                                                  | 0.20421100  | −0.64203000 | 3.38668900  |
| H                                                                  | −0.26881000 | −0.43944300 | 4.35424100  |
| C                                                                  | 0.78378400  | −2.07232900 | 3.45074800  |

|   |             |             |             |
|---|-------------|-------------|-------------|
| H | 0.16921300  | −2.74059100 | 4.06164100  |
| H | 0.85529400  | −2.50857900 | 2.44856500  |
| C | 2.19761600  | −1.87470000 | 4.00608800  |
| H | 2.15827600  | −1.68013900 | 5.08645600  |
| H | 2.84151000  | −2.74627500 | 3.84666500  |
| C | 2.67389400  | −0.62683200 | 3.26026600  |
| H | 2.94370200  | −0.90570300 | 2.23361400  |
| H | 3.54981700  | −0.15283000 | 3.71596300  |
| C | 1.44273300  | 0.29775200  | 3.23223300  |
| H | 1.41842700  | 0.88301500  | 2.30789700  |
| H | 1.47161500  | 1.01059600  | 4.06510400  |
| C | −1.53435000 | 1.43831300  | 2.58639100  |
| H | −0.58129400 | 1.96799500  | 2.47403100  |
| C | −2.04508200 | 1.63014900  | 4.04566100  |
| H | −1.96761500 | 0.73185700  | 4.66500400  |
| H | −1.44205000 | 2.40198100  | 4.54024600  |
| C | −3.49579600 | 2.10949700  | 3.91808000  |
| H | −4.16627800 | 1.24902800  | 3.80031800  |
| H | −3.83265000 | 2.67191400  | 4.79513400  |
| C | −3.48406200 | 2.93852900  | 2.63340300  |
| H | −3.02774800 | 3.91811700  | 2.83467600  |
| H | −4.48308600 | 3.11904300  | 2.22326400  |
| C | −2.59357100 | 2.12806000  | 1.68141600  |
| H | −2.12318100 | 2.77171100  | 0.93461400  |
| H | −3.18580900 | 1.39552400  | 1.12885800  |
| C | 0.40072400  | −0.82906800 | −3.76144500 |
| H | 0.99662600  | −1.42718500 | −4.46422000 |
| C | 0.72903600  | 0.64643100  | −4.04301600 |
| H | 1.79952700  | 0.81156300  | −4.19838500 |
| H | 0.41816600  | 1.28456100  | −3.20868900 |
| C | −0.09896200 | 0.95167600  | −5.29748200 |
| H | −0.24891400 | 2.02507700  | −5.45516800 |
| H | 0.42675500  | 0.56331500  | −6.17915800 |
| C | −1.42190200 | 0.18825800  | −5.09342900 |
| H | −2.17968900 | 0.84680500  | −4.65424100 |
| H | −1.83010100 | −0.17083100 | −6.04349400 |
| C | −1.09827300 | −0.97581500 | −4.11972600 |
| H | −1.29662000 | −1.95372900 | −4.57147300 |
| H | −1.71420600 | −0.90596500 | −3.21556200 |
| C | 0.51844600  | −3.27921600 | −2.35400500 |
| H | −0.55090000 | −3.32069200 | −2.59933200 |
| C | 0.75344200  | −4.22096500 | −1.13301200 |
| H | 1.31835000  | −3.74235900 | −0.33147100 |
| H | −0.21024100 | −4.50277100 | −0.69734100 |
| C | 1.50252200  | −5.45245400 | −1.68459100 |
| H | 2.57937000  | −5.35132900 | −1.49713200 |
| H | 1.17938500  | −6.38612000 | −1.21355000 |
| C | 1.24869700  | −5.42305900 | −3.19477400 |
| H | 0.24973200  | −5.82032700 | −3.41778700 |
| H | 1.97543700  | −6.00929700 | −3.76703300 |
| C | 1.29277300  | −3.92768400 | −3.52080200 |
| H | 0.85486600  | −3.69330900 | −4.49623400 |
| H | 2.33758200  | −3.58996600 | −3.53649400 |
| C | 2.62782400  | −1.21652300 | −1.99457100 |
| H | 3.02776400  | −1.51050100 | −2.97292200 |
| C | 3.02215200  | 0.26984600  | −1.71836800 |
| H | 3.49890900  | 0.69965800  | −2.60583300 |
| H | 2.15683600  | 0.89323200  | −1.47947500 |

|                                                                      |             |             |             |
|----------------------------------------------------------------------|-------------|-------------|-------------|
| C                                                                    | 4.00699600  | 0.23596100  | −0.53512900 |
| H                                                                    | 4.77751600  | 1.01172200  | −0.60732300 |
| H                                                                    | 3.45737500  | 0.40129600  | 0.39931200  |
| C                                                                    | 4.58213900  | −1.18279600 | −0.55469200 |
| H                                                                    | 5.04269700  | −1.47462100 | 0.39536900  |
| H                                                                    | 5.34627500  | −1.27209200 | −1.33869400 |
| C                                                                    | 3.35873200  | −2.03369700 | −0.90660800 |
| H                                                                    | 2.73194900  | −2.12547300 | −0.01314800 |
| H                                                                    | 3.61052900  | −3.04414100 | −1.24593600 |
| P                                                                    | −1.08735700 | −0.30630600 | 2.08672100  |
| P                                                                    | 0.78408400  | −1.46049700 | −2.05748200 |
| Os                                                                   | −0.31720100 | −0.70805800 | −0.10911800 |
| H                                                                    | 1.14651500  | −0.46608600 | 0.49146700  |
| H                                                                    | −2.38510600 | 2.11530400  | −1.14796600 |
| H                                                                    | −0.95387300 | −2.16390600 | 0.00890000  |
| H                                                                    | 0.52821600  | −1.88154900 | 0.54214000  |
| C                                                                    | 0.48215100  | 4.81526100  | 0.10954900  |
| C                                                                    | 1.76329400  | 3.97800000  | 0.47078500  |
| C                                                                    | 0.75243900  | 6.07726800  | −0.69292600 |
| H                                                                    | −0.18797700 | 6.60044200  | −0.88970500 |
| H                                                                    | 1.40635500  | 6.75418500  | −0.13319300 |
| H                                                                    | 1.22147200  | 5.85094000  | −1.65270300 |
| C                                                                    | 2.85268600  | 4.05286200  | −0.59962400 |
| H                                                                    | 3.33800200  | 5.03337100  | −0.61256200 |
| H                                                                    | 3.61105300  | 3.29524900  | −0.38356500 |
| H                                                                    | 2.44987400  | 3.85137200  | −1.59738900 |
| C                                                                    | −0.38370000 | 5.13435300  | 1.32858700  |
| H                                                                    | 0.08267400  | 5.89781900  | 1.95848600  |
| H                                                                    | −1.35160800 | 5.51304400  | 0.98824200  |
| H                                                                    | −0.56236300 | 4.24410500  | 1.93923000  |
| C                                                                    | 2.34971300  | 4.26432400  | 1.84406600  |
| H                                                                    | 3.22170100  | 3.62462300  | 2.00990600  |
| H                                                                    | 2.67315300  | 5.30788700  | 1.91804100  |
| H                                                                    | 1.62965000  | 4.06286200  | 2.63999900  |
| O                                                                    | −0.26668400 | 3.88809200  | −0.71606900 |
| O                                                                    | 1.25533300  | 2.62772600  | 0.46057000  |
| B                                                                    | 0.15664600  | 2.63070100  | −0.36175300 |
| O                                                                    | −0.40989600 | 1.47385000  | −0.77109200 |
| C                                                                    | −1.74936100 | 1.26170400  | −1.43542100 |
| H                                                                    | −1.51614600 | 1.33128200  | −2.51113000 |
| O                                                                    | −2.17349200 | 0.07468000  | −1.01465400 |
| TS <sub>11,12-0s</sub>                                               |             |             |             |
| G <sub>solv</sub> = −2550.742116; E <sub>solv</sub> = −2551.71474185 |             |             |             |
| C                                                                    | −2.41274400 | −1.49004000 | 2.82290700  |
| H                                                                    | −2.55900300 | −1.27403900 | 3.88803300  |
| C                                                                    | −2.12556300 | −3.01690300 | 2.65827500  |
| H                                                                    | −1.15458500 | −3.22141200 | 2.20260800  |
| H                                                                    | −2.12950500 | −3.49684600 | 3.64362900  |
| C                                                                    | −3.26604700 | −3.56777900 | 1.78648700  |
| H                                                                    | −2.98296200 | −3.50127300 | 0.72793600  |
| H                                                                    | −3.49502800 | −4.61567600 | 2.00759100  |
| C                                                                    | −4.43289100 | −2.61733700 | 2.05562400  |
| H                                                                    | −4.88002200 | −2.83421000 | 3.03534000  |
| H                                                                    | −5.22597300 | −2.68198400 | 1.30315800  |
| C                                                                    | −3.74582800 | −1.24902600 | 2.07086800  |
| H                                                                    | −4.35179400 | −0.47007300 | 2.54411800  |
| H                                                                    | −3.54691700 | −0.93967400 | 1.03945500  |
| C                                                                    | 0.30157100  | −0.70023800 | 3.50463300  |

|   |             |             |             |
|---|-------------|-------------|-------------|
| H | -0.16780200 | -0.49246700 | 4.47369200  |
| C | 0.90342100  | -2.12107200 | 3.57955500  |
| H | 0.30241300  | -2.79462800 | 4.19802000  |
| H | 0.97822300  | -2.56459300 | 2.58040800  |
| C | 2.31638800  | -1.89516100 | 4.12531600  |
| H | 2.27867700  | -1.68640600 | 5.20307700  |
| H | 2.97261500  | -2.75910100 | 3.97466100  |
| C | 2.76817700  | -0.65061700 | 3.35932100  |
| H | 3.03479900  | -0.94041200 | 2.33498800  |
| H | 3.64072100  | -0.15729500 | 3.80063000  |
| C | 1.52343600  | 0.25573700  | 3.32784400  |
| H | 1.48455600  | 0.83361900  | 2.40016100  |
| H | 1.54865700  | 0.97653000  | 4.15407400  |
| C | -1.50506000 | 1.32133000  | 2.69532000  |
| H | -0.56384000 | 1.86649100  | 2.55958900  |
| C | -1.99756300 | 1.53662700  | 4.15888000  |
| H | -2.00553100 | 0.62287800  | 4.76048100  |
| H | -1.32587000 | 2.23816800  | 4.66820800  |
| C | -3.40333500 | 2.14499400  | 4.04194600  |
| H | -4.15303500 | 1.34633900  | 3.97326900  |
| H | -3.66564800 | 2.76748100  | 4.90369400  |
| C | -3.35549800 | 2.91928000  | 2.72380100  |
| H | -2.80311100 | 3.85822100  | 2.86703700  |
| H | -4.34694200 | 3.17593800  | 2.33564800  |
| C | -2.57623300 | 1.98593500  | 1.79016300  |
| H | -2.11492000 | 2.51813700  | 0.95533500  |
| H | -3.25121000 | 1.24308700  | 1.35724300  |
| C | 0.53314600  | -0.89679900 | -3.63110600 |
| H | 1.21646100  | -1.42912800 | -4.30628600 |
| C | 0.76088000  | 0.60964000  | -3.85038100 |
| H | 1.82179100  | 0.85591500  | -3.95376800 |
| H | 0.37561600  | 1.19319300  | -3.00660700 |
| C | -0.03262600 | 0.89841100  | -5.13031700 |
| H | -0.24591700 | 1.96377800  | -5.26679500 |
| H | 0.54905800  | 0.56711200  | -6.00023200 |
| C | -1.30870600 | 0.04845600  | -4.99613500 |
| H | -2.10432400 | 0.63425900  | -4.52072200 |
| H | -1.69396000 | -0.26929000 | -5.96994400 |
| C | -0.92155500 | -1.15719000 | -4.10024300 |
| H | -0.98625500 | -2.10519200 | -4.64450900 |
| H | -1.60285500 | -1.24250700 | -3.24509000 |
| C | 0.62881400  | -3.36160200 | -2.24875200 |
| H | -0.43023300 | -3.41596400 | -2.53350500 |
| C | 0.83099900  | -4.31566900 | -1.03257100 |
| H | 1.40156400  | -3.85343900 | -0.22504300 |
| H | -0.14152100 | -4.57798300 | -0.60490500 |
| C | 1.56141300  | -5.55947900 | -1.58561600 |
| H | 2.63267700  | -5.49866900 | -1.35463600 |
| H | 1.19032400  | -6.49222700 | -1.14948800 |
| C | 1.36854800  | -5.49125700 | -3.10433100 |
| H | 0.37315700  | -5.86571500 | -3.37743500 |
| H | 2.10833900  | -6.07707100 | -3.65990500 |
| C | 1.44976800  | -3.99003600 | -3.39314800 |
| H | 1.06405900  | -3.72501600 | -4.38281000 |
| H | 2.49858900  | -3.66823600 | -3.34875700 |
| C | 2.70645700  | -1.29739500 | -1.80831300 |
| H | 3.13260200  | -1.60512500 | -2.77109500 |
| C | 3.09555600  | 0.19117200  | -1.54223400 |

|                                                                    |             |             |             |
|--------------------------------------------------------------------|-------------|-------------|-------------|
| H                                                                  | 3.57652600  | 0.61408700  | −2.43075700 |
| H                                                                  | 2.22641200  | 0.81255800  | −1.31328000 |
| C                                                                  | 4.07153600  | 0.16871700  | −0.35060500 |
| H                                                                  | 4.85370300  | 0.93132000  | −0.43442000 |
| H                                                                  | 3.51573800  | 0.36660600  | 0.57354700  |
| C                                                                  | 4.63038300  | −1.25655900 | −0.33206400 |
| H                                                                  | 5.06930300  | −1.53465700 | 0.63233100  |
| H                                                                  | 5.40874300  | −1.36964400 | −1.09876600 |
| C                                                                  | 3.40674500  | −2.10330500 | −0.69227900 |
| H                                                                  | 2.76125600  | −2.17612600 | 0.18979400  |
| H                                                                  | 3.65695100  | −3.12117500 | −1.01029200 |
| P                                                                  | −1.02003100 | −0.41609300 | 2.22402000  |
| P                                                                  | 0.86688000  | −1.54415900 | −1.92166700 |
| Os                                                                 | −0.27485300 | −0.81261100 | 0.01281800  |
| H                                                                  | 1.18295300  | −0.57805200 | 0.60253200  |
| H                                                                  | −2.63525900 | 1.80790800  | −1.22174300 |
| H                                                                  | −0.91429900 | −2.27739200 | 0.10517000  |
| H                                                                  | 0.49336400  | −2.02861900 | 0.66304500  |
| C                                                                  | 0.64982700  | 4.63461400  | 0.27047400  |
| C                                                                  | 1.90943800  | 3.79530700  | 0.68962300  |
| C                                                                  | 0.95935900  | 5.88695800  | −0.53654000 |
| H                                                                  | 0.03080000  | 6.41725300  | −0.76980400 |
| H                                                                  | 1.60320100  | 6.56604900  | 0.03295000  |
| H                                                                  | 1.45416000  | 5.64372300  | −1.47943400 |
| C                                                                  | 3.02775700  | 3.83930500  | −0.35424800 |
| H                                                                  | 3.52021300  | 4.81645000  | −0.38216100 |
| H                                                                  | 3.77530100  | 3.08314200  | −0.09971700 |
| H                                                                  | 2.64670900  | 3.61259300  | −1.35513300 |
| C                                                                  | −0.24761300 | 4.98551700  | 1.46015400  |
| H                                                                  | 0.20434700  | 5.75315800  | 2.09628600  |
| H                                                                  | −1.20157100 | 5.36712800  | 1.08449600  |
| H                                                                  | −0.45490900 | 4.10435000  | 2.07499700  |
| C                                                                  | 2.46855300  | 4.11791000  | 2.06799800  |
| H                                                                  | 3.32794900  | 3.47229700  | 2.27456000  |
| H                                                                  | 2.80436000  | 5.15924300  | 2.12092100  |
| H                                                                  | 1.72743200  | 3.94875900  | 2.85240600  |
| O                                                                  | −0.07325900 | 3.70732300  | −0.55578200 |
| O                                                                  | 1.38999900  | 2.45921600  | 0.70429500  |
| B                                                                  | 0.29589600  | 2.42073500  | −0.15757000 |
| O                                                                  | −0.31400200 | 1.31521500  | −0.55101900 |
| C                                                                  | −2.07093400 | 0.88752800  | −1.42923500 |
| H                                                                  | −1.52454400 | 0.87046400  | −2.37470600 |
| O                                                                  | −2.33227400 | −0.15833900 | −0.80489000 |
| <b>12Os</b>                                                        |             |             |             |
| $G_{\text{solv}} = -2550.757038; E_{\text{solv}} = -2551.72757047$ |             |             |             |
| C                                                                  | −2.50224000 | −1.37053100 | 2.64030500  |
| H                                                                  | −2.67049500 | −1.13519100 | 3.69792700  |
| C                                                                  | −2.19651400 | −2.89737000 | 2.51491000  |
| H                                                                  | −1.22926900 | −3.09903300 | 2.05040900  |
| H                                                                  | −2.18009100 | −3.34985100 | 3.51274000  |
| C                                                                  | −3.33974500 | −3.48847700 | 1.67246500  |
| H                                                                  | −3.06169800 | −3.46401100 | 0.61075800  |
| H                                                                  | −3.56300200 | −4.52736800 | 1.93684700  |
| C                                                                  | −4.51118900 | −2.53431100 | 1.90789400  |
| H                                                                  | −4.95532300 | −2.71359600 | 2.89635000  |
| H                                                                  | −5.30610500 | −2.63112900 | 1.16068700  |
| C                                                                  | −3.82883700 | −1.16417000 | 1.87133700  |
| H                                                                  | −4.43965500 | −0.36557000 | 2.30401300  |

|   |             |             |             |
|---|-------------|-------------|-------------|
| H | -3.62343800 | -0.90657100 | 0.82651000  |
| C | 0.16450000  | -0.53624400 | 3.38904600  |
| H | -0.35310900 | -0.33240000 | 4.33462000  |
| C | 0.78875600  | -1.94703600 | 3.48951700  |
| H | 0.18577200  | -2.62601600 | 4.10020200  |
| H | 0.89135900  | -2.39489900 | 2.49491100  |
| C | 2.18699500  | -1.69688700 | 4.06234700  |
| H | 2.12564600  | -1.48833500 | 5.13919100  |
| H | 2.85972300  | -2.55030100 | 3.92476700  |
| C | 2.63240100  | -0.44431100 | 3.30597600  |
| H | 2.92045600  | -0.72407800 | 2.28431700  |
| H | 3.48844100  | 0.06220400  | 3.76447600  |
| C | 1.37394000  | 0.44064700  | 3.25689200  |
| H | 1.35193200  | 1.03139700  | 2.33798300  |
| H | 1.36688100  | 1.14777600  | 4.09549300  |
| C | -1.63439700 | 1.44962300  | 2.45134100  |
| H | -0.69820700 | 2.00625300  | 2.32924500  |
| C | -2.18809800 | 1.71962000  | 3.88283900  |
| H | -2.27219400 | 0.81873900  | 4.49820000  |
| H | -1.50934900 | 2.39649100  | 4.41485400  |
| C | -3.55820700 | 2.39008900  | 3.68202300  |
| H | -4.34489400 | 1.62639300  | 3.62888600  |
| H | -3.81837100 | 3.07045200  | 4.49932200  |
| C | -3.43365300 | 3.08753300  | 2.32576200  |
| H | -2.84134100 | 4.00623900  | 2.43213400  |
| H | -4.40025600 | 3.36572500  | 1.89211500  |
| C | -2.66964800 | 2.06631400  | 1.47635800  |
| H | -2.17920300 | 2.50888600  | 0.60583000  |
| H | -3.36987000 | 1.30993100  | 1.10713900  |
| C | 0.37535500  | -0.72974200 | -3.74248700 |
| H | 1.08266500  | -1.15772600 | -4.46573900 |
| C | 0.45117100  | 0.80558400  | -3.84941000 |
| H | 1.47694100  | 1.16365300  | -3.97914500 |
| H | 0.05209100  | 1.26888000  | -2.94015100 |
| C | -0.44387400 | 1.11748800  | -5.05169500 |
| H | -0.72685400 | 2.17378300  | -5.11162400 |
| H | 0.07747500  | 0.85908400  | -5.98322100 |
| C | -1.64642400 | 0.18743000  | -4.84764900 |
| H | -2.36456100 | 0.66968500  | -4.17074100 |
| H | -2.18526100 | -0.02526800 | -5.77630200 |
| C | -1.06922000 | -1.09008800 | -4.19281600 |
| H | -1.04825800 | -1.92637900 | -4.89951600 |
| H | -1.69051300 | -1.40899000 | -3.34917400 |
| C | 0.59649400  | -3.24207000 | -2.43478600 |
| H | -0.46294600 | -3.31262800 | -2.71299400 |
| C | 0.82166400  | -4.21157600 | -1.23636200 |
| H | 1.41347200  | -3.76064300 | -0.43742600 |
| H | -0.14167400 | -4.47282300 | -0.78803000 |
| C | 1.53309900  | -5.45155600 | -1.82439500 |
| H | 2.60622000  | -5.41036800 | -1.59823300 |
| H | 1.15269300  | -6.38991900 | -1.40867600 |
| C | 1.33271100  | -5.34707300 | -3.34129600 |
| H | 0.33510200  | -5.71265500 | -3.61859800 |
| H | 2.06843700  | -5.92205500 | -3.91338400 |
| C | 1.41637600  | -3.83948200 | -3.59496200 |
| H | 1.03120900  | -3.54566000 | -4.57697800 |
| H | 2.46576100  | -3.52192600 | -3.54134000 |
| C | 2.64838600  | -1.16364000 | -2.03067200 |

|                                                                    |             |             |             |
|--------------------------------------------------------------------|-------------|-------------|-------------|
| H                                                                  | 3.04473300  | −1.46176500 | −3.00913100 |
| C                                                                  | 3.03810200  | 0.32320100  | −1.76308400 |
| H                                                                  | 3.47540100  | 0.76081000  | −2.66726600 |
| H                                                                  | 2.17371900  | 0.93149700  | −1.48878100 |
| C                                                                  | 4.06331700  | 0.29147700  | −0.61264200 |
| H                                                                  | 4.84152200  | 1.05414600  | −0.72438500 |
| H                                                                  | 3.54488600  | 0.48371300  | 0.33433600  |
| C                                                                  | 4.62106000  | −1.13418200 | −0.62421800 |
| H                                                                  | 5.09676600  | −1.41860900 | 0.32064900  |
| H                                                                  | 5.36885100  | −1.24436500 | −1.42139100 |
| C                                                                  | 3.38309300  | −1.97609900 | −0.94228900 |
| H                                                                  | 2.76560100  | −2.04731100 | −0.03972900 |
| H                                                                  | 3.61836600  | −2.99421200 | −1.27097300 |
| P                                                                  | −1.10660100 | −0.29106200 | 2.05123500  |
| P                                                                  | 0.81219300  | −1.42934300 | −2.07964000 |
| Os                                                                 | −0.31330200 | −0.71014800 | −0.13154700 |
| H                                                                  | 1.13957700  | −0.50990200 | 0.49341700  |
| H                                                                  | −3.76893100 | 0.72836900  | −2.01358700 |
| H                                                                  | −1.01622500 | −2.15944100 | −0.06715500 |
| H                                                                  | 0.38897100  | −1.96858200 | 0.52578200  |
| C                                                                  | 0.73799400  | 4.67509600  | 0.08913400  |
| C                                                                  | 1.95465600  | 3.85291000  | 0.64722400  |
| C                                                                  | 1.12036400  | 5.89362900  | −0.73977100 |
| H                                                                  | 0.21651400  | 6.41204000  | −1.07529100 |
| H                                                                  | 1.71494800  | 6.59813100  | −0.14773100 |
| H                                                                  | 1.69324500  | 5.61031200  | −1.62569400 |
| C                                                                  | 3.16227200  | 3.86577400  | −0.29326400 |
| H                                                                  | 3.64472600  | 4.84801900  | −0.32549900 |
| H                                                                  | 3.89280500  | 3.13557800  | 0.06499700  |
| H                                                                  | 2.87560700  | 3.58378200  | −1.31135200 |
| C                                                                  | −0.25053400 | 5.08168900  | 1.18670200  |
| H                                                                  | 0.15087500  | 5.87340100  | 1.82750700  |
| H                                                                  | −1.16797100 | 5.44936900  | 0.71722200  |
| H                                                                  | −0.51412800 | 4.22671300  | 1.81691100  |
| C                                                                  | 2.39279200  | 4.23161800  | 2.05625100  |
| H                                                                  | 3.23278500  | 3.59961000  | 2.36146600  |
| H                                                                  | 2.72041700  | 5.27629800  | 2.09832500  |
| H                                                                  | 1.58689500  | 4.08862100  | 2.77990400  |
| O                                                                  | 0.08088900  | 3.71987000  | −0.74936600 |
| O                                                                  | 1.43767700  | 2.52004900  | 0.66644500  |
| B                                                                  | 0.39631200  | 2.43389900  | −0.26910800 |
| O                                                                  | −0.22269300 | 1.34738500  | −0.65661000 |
| C                                                                  | −2.74109700 | 0.69298800  | −1.62439900 |
| H                                                                  | −2.09551600 | 1.57962900  | −1.66268400 |
| O                                                                  | −2.33265200 | −0.34856300 | −1.13621500 |
| <b>13Os</b>                                                        |             |             |             |
| $G_{\text{solv}} = -2436.295427; E_{\text{solv}} = -2437.23236342$ |             |             |             |
| C                                                                  | −2.08256900 | −1.78607200 | 3.02384100  |
| H                                                                  | −2.33467800 | −1.47032300 | 4.04277800  |
| C                                                                  | −1.40414200 | −3.19090300 | 3.09048200  |
| H                                                                  | −0.39762300 | −3.19574600 | 2.66595200  |
| H                                                                  | −1.31737500 | −3.50574000 | 4.13646200  |
| C                                                                  | −2.33195000 | −4.14234100 | 2.31572800  |
| H                                                                  | −2.02549400 | −4.17544000 | 1.26254100  |
| H                                                                  | −2.30278600 | −5.16591100 | 2.70327700  |
| C                                                                  | −3.71168500 | −3.49077100 | 2.42097100  |
| H                                                                  | −4.13718500 | −3.66296300 | 3.41862400  |
| H                                                                  | −4.42709000 | −3.86811900 | 1.68278800  |

|   |             |             |             |
|---|-------------|-------------|-------------|
| C | -3.39353100 | -2.00468800 | 2.23214700  |
| H | -4.19729700 | -1.34446900 | 2.57321900  |
| H | -3.23134000 | -1.80933900 | 1.16426400  |
| C | 0.24449100  | -0.18214900 | 3.65962500  |
| H | -0.33924300 | -0.00500300 | 4.57262900  |
| C | 1.22755500  | -1.33899700 | 3.93547200  |
| H | 0.79831500  | -2.10427300 | 4.58950700  |
| H | 1.51701800  | -1.82603000 | 2.99636100  |
| C | 2.44887800  | -0.64176800 | 4.54180200  |
| H | 2.24199600  | -0.36202000 | 5.58356300  |
| H | 3.34402600  | -1.27270300 | 4.53797600  |
| C | 2.59202300  | 0.61278100  | 3.67505100  |
| H | 3.08841800  | 0.35459200  | 2.73162500  |
| H | 3.18720000  | 1.39880600  | 4.15166900  |
| C | 1.14414900  | 1.05939000  | 3.38324100  |
| H | 1.06929800  | 1.41239400  | 2.35170500  |
| H | 0.84390600  | 1.88899100  | 4.03417600  |
| C | -1.94612200 | 1.10491400  | 2.37887500  |
| H | -1.18009000 | 1.86038400  | 2.16137700  |
| C | -2.62144900 | 1.48437500  | 3.72071400  |
| H | -2.90022600 | 0.60141200  | 4.30556500  |
| H | -1.93580500 | 2.06866900  | 4.34368600  |
| C | -3.88621600 | 2.29630800  | 3.33486300  |
| H | -4.78557600 | 1.70479000  | 3.54346000  |
| H | -3.97534800 | 3.22601200  | 3.90581100  |
| C | -3.77251600 | 2.54205800  | 1.82145000  |
| H | -3.16441700 | 3.43413700  | 1.62290100  |
| H | -4.74548600 | 2.69226800  | 1.34194200  |
| C | -3.03221900 | 1.30516500  | 1.30664800  |
| H | -2.59297100 | 1.43857000  | 0.31510600  |
| H | -3.72061600 | 0.45396000  | 1.26744100  |
| C | 0.74300500  | -0.42689000 | -3.32066700 |
| H | 1.12078200  | -0.96431800 | -4.19878600 |
| C | 1.49225000  | 0.92082500  | -3.23731200 |
| H | 2.52454000  | 0.83983400  | -3.59372000 |
| H | 1.52828500  | 1.28142000  | -2.20707900 |
| C | 0.63393300  | 1.86552600  | -4.08458400 |
| H | 0.84867400  | 2.92301600  | -3.89277900 |
| H | 0.81169700  | 1.67773500  | -5.15228300 |
| C | -0.79709600 | 1.47243500  | -3.70454500 |
| H | -1.05181700 | 1.92487200  | -2.74071200 |
| H | -1.53999100 | 1.80113400  | -4.43887100 |
| C | -0.75307800 | -0.06212000 | -3.55621900 |
| H | -1.12152100 | -0.55987100 | -4.46033500 |
| H | -1.39316700 | -0.38816100 | -2.72745600 |
| C | 0.31386200  | -3.13947000 | -2.60575300 |
| H | -0.70029800 | -2.86039800 | -2.92235900 |
| C | 0.18513700  | -4.34782500 | -1.62964000 |
| H | 0.74772400  | -4.20544900 | -0.70511500 |
| H | -0.86147200 | -4.46764600 | -1.33242500 |
| C | 0.68777500  | -5.58002800 | -2.41157700 |
| H | 1.72908400  | -5.79621500 | -2.14100700 |
| H | 0.10492100  | -6.48084100 | -2.19542000 |
| C | 0.62478400  | -5.16416400 | -3.88480500 |
| H | -0.40538900 | -5.24200800 | -4.25674900 |
| H | 1.25966700  | -5.77624600 | -4.53382000 |
| C | 1.05019100  | -3.69359200 | -3.84445600 |
| H | 0.79832800  | -3.15159700 | -4.76139300 |

|                                                                    |             |             |             |
|--------------------------------------------------------------------|-------------|-------------|-------------|
| H                                                                  | 2.13838000  | −3.63643000 | −3.71422600 |
| C                                                                  | 2.79568900  | −1.75875900 | −1.75690100 |
| H                                                                  | 3.17440800  | −1.87436400 | −2.78008600 |
| C                                                                  | 3.50662300  | −0.53797300 | −1.09014100 |
| H                                                                  | 4.10791300  | −0.00833500 | −1.83684900 |
| H                                                                  | 2.80392400  | 0.18842200  | −0.67266700 |
| C                                                                  | 4.40310400  | −1.12834100 | 0.01635800  |
| H                                                                  | 5.33434500  | −0.56740300 | 0.14699200  |
| H                                                                  | 3.86713600  | −1.10506600 | 0.97394400  |
| C                                                                  | 4.62199600  | −2.58511400 | −0.39907600 |
| H                                                                  | 4.96229900  | −3.22333500 | 0.42319700  |
| H                                                                  | 5.36811900  | −2.64524400 | −1.20290700 |
| C                                                                  | 3.24196900  | −2.98292200 | −0.92799000 |
| H                                                                  | 2.56858300  | −3.12838300 | −0.07469200 |
| H                                                                  | 3.24386700  | −3.90723900 | −1.51526400 |
| P                                                                  | −0.98373900 | −0.47884900 | 2.30017200  |
| P                                                                  | 0.95651200  | −1.55799000 | −1.86711100 |
| Os                                                                 | −0.06945900 | −0.95001600 | 0.17381300  |
| H                                                                  | 1.33416300  | −1.11684600 | 0.86950100  |
| H                                                                  | −0.97262200 | −2.27062200 | 0.10477900  |
| H                                                                  | 0.36635000  | −2.40038100 | 0.72156600  |
| C                                                                  | 0.56569500  | 4.44598700  | 0.15426300  |
| C                                                                  | 1.98501400  | 3.77224000  | 0.14498500  |
| C                                                                  | 0.45928400  | 5.71677300  | −0.67635900 |
| H                                                                  | −0.55494300 | 6.12187100  | −0.60527500 |
| H                                                                  | 1.15604400  | 6.47939900  | −0.31131700 |
| H                                                                  | 0.67143000  | 5.52422300  | −1.73041100 |
| C                                                                  | 2.71882600  | 3.94783300  | −1.18683000 |
| H                                                                  | 3.07952400  | 4.97262700  | −1.32167900 |
| H                                                                  | 3.57996700  | 3.27286200  | −1.20730300 |
| H                                                                  | 2.07304600  | 3.69277200  | −2.03232500 |
| C                                                                  | 0.04575600  | 4.70334400  | 1.57221100  |
| H                                                                  | 0.58036300  | 5.52482000  | 2.05983400  |
| H                                                                  | −1.01446200 | 4.96756500  | 1.51765700  |
| H                                                                  | 0.14010600  | 3.81032800  | 2.19877800  |
| C                                                                  | 2.89285700  | 4.17813900  | 1.29821900  |
| H                                                                  | 3.85335900  | 3.66079400  | 1.20970500  |
| H                                                                  | 3.08502000  | 5.25663300  | 1.28569700  |
| H                                                                  | 2.45713100  | 3.90946800  | 2.26325300  |
| O                                                                  | −0.26291000 | 3.43016100  | −0.42793400 |
| O                                                                  | 1.66079300  | 2.38446100  | 0.27743400  |
| B                                                                  | 0.35034900  | 2.19704000  | −0.18143500 |
| O                                                                  | −0.21185500 | 1.02277500  | −0.35394900 |
| <b>14os</b>                                                        |             |             |             |
| $G_{\text{solv}} = -2847.918071; E_{\text{solv}} = -2849.04309690$ |             |             |             |
| C                                                                  | −1.07822400 | −1.46688800 | 3.46578900  |
| H                                                                  | −1.13769300 | −1.13742700 | 4.50965600  |
| C                                                                  | −0.38000500 | −2.86376300 | 3.42627400  |
| H                                                                  | 0.55574700  | −2.85990500 | 2.86441100  |
| H                                                                  | −0.14260800 | −3.18108900 | 4.44820000  |
| C                                                                  | −1.39986300 | −3.82354700 | 2.79424400  |
| H                                                                  | −1.28518700 | −3.81453200 | 1.70213500  |
| H                                                                  | −1.27334900 | −4.85667200 | 3.13479900  |
| C                                                                  | −2.75327100 | −3.21711800 | 3.16485600  |
| H                                                                  | −2.98086400 | −3.41744800 | 4.22061300  |
| H                                                                  | −3.58300900 | −3.60447200 | 2.56379700  |
| C                                                                  | −2.51450200 | −1.72086500 | 2.94321100  |
| H                                                                  | −3.25373300 | −1.08758900 | 3.44290500  |

|   |             |             |             |
|---|-------------|-------------|-------------|
| H | -2.57953800 | -1.51108200 | 1.87049300  |
| C | 1.31959600  | 0.15653300  | 3.63483900  |
| H | 0.91069100  | 0.37257900  | 4.62885600  |
| C | 2.32214800  | -1.01106000 | 3.78303600  |
| H | 2.04827000  | -1.69189200 | 4.59518400  |
| H | 2.36807400  | -1.59875100 | 2.86058600  |
| C | 3.67605300  | -0.32670000 | 3.99627200  |
| H | 3.76030000  | 0.03763500  | 5.02914900  |
| H | 4.52227500  | -0.99667200 | 3.80819500  |
| C | 3.60895200  | 0.85306600  | 3.02514300  |
| H | 3.76736100  | 0.48956800  | 2.00155400  |
| H | 4.36160600  | 1.62374600  | 3.22342500  |
| C | 2.16997200  | 1.37829100  | 3.16529700  |
| H | 1.81505000  | 1.80947000  | 2.22574000  |
| H | 2.12216800  | 2.16899800  | 3.92425400  |
| C | -1.09270300 | 1.42758400  | 2.87997700  |
| H | -0.39586300 | 2.19609200  | 2.52600600  |
| C | -1.44749900 | 1.72314600  | 4.36986700  |
| H | -1.14767200 | 0.93009200  | 5.06141600  |
| H | -0.92528600 | 2.63067400  | 4.69537700  |
| C | -2.96912000 | 1.94521600  | 4.40250900  |
| H | -3.48355500 | 0.98986800  | 4.56852200  |
| H | -3.27805100 | 2.62612100  | 5.20250900  |
| C | -3.29633900 | 2.46238700  | 2.99985400  |
| H | -3.01008700 | 3.52014700  | 2.91814800  |
| H | -4.36100900 | 2.38964200  | 2.75056700  |
| C | -2.41596900 | 1.59459400  | 2.09505500  |
| H | -2.24556300 | 2.02455200  | 1.10663500  |
| H | -2.90846700 | 0.63754100  | 1.92020400  |
| C | 1.88878800  | -0.12168500 | -3.00895000 |
| H | 2.45435100  | -0.66012800 | -3.78277600 |
| C | 2.75312500  | 1.06423100  | -2.54924500 |
| H | 3.80121500  | 0.79165700  | -2.39316900 |
| H | 2.36645600  | 1.47605200  | -1.60786400 |
| C | 2.56020000  | 2.06741900  | -3.68969600 |
| H | 2.91667800  | 3.07419100  | -3.44684200 |
| H | 3.12053200  | 1.72802000  | -4.57164200 |
| C | 1.05069800  | 2.00348100  | -3.96092800 |
| H | 0.52029300  | 2.67305700  | -3.27319300 |
| H | 0.79377400  | 2.31293700  | -4.97979500 |
| C | 0.64501200  | 0.53716900  | -3.66443500 |
| H | 0.36335300  | -0.00227100 | -4.57593500 |
| H | -0.21187400 | 0.50773100  | -2.98893100 |
| C | 0.50730400  | -2.59071200 | -2.73930100 |
| H | -0.30771600 | -1.97533600 | -3.13342100 |
| C | -0.14987000 | -3.76248900 | -1.95358500 |
| H | 0.31111400  | -3.92798600 | -0.97719100 |
| H | -1.20184800 | -3.52610200 | -1.76195000 |
| C | -0.00873900 | -5.00656800 | -2.85917200 |
| H | 0.82860600  | -5.62701400 | -2.51526900 |
| H | -0.90280100 | -5.63816000 | -2.84976500 |
| C | 0.31460100  | -4.44926400 | -4.25081300 |
| H | -0.60458800 | -4.10311800 | -4.74270600 |
| H | 0.78860300  | -5.18454700 | -4.90961600 |
| C | 1.21454700  | -3.24966400 | -3.93891200 |
| H | 1.32799600  | -2.56416100 | -4.78553700 |
| H | 2.21423600  | -3.61254600 | -3.66810200 |
| C | 3.11266600  | -2.19492200 | -1.44618800 |

|    |             |             |             |
|----|-------------|-------------|-------------|
| H  | 3.53034100  | −2.37283700 | −2.44430900 |
| C  | 4.13327600  | −1.33486800 | −0.63771600 |
| H  | 4.97572800  | −1.06374300 | −1.28366700 |
| H  | 3.69887000  | −0.40336400 | −0.26666300 |
| C  | 4.61087700  | −2.22877200 | 0.52032500  |
| H  | 5.64594400  | −2.02306600 | 0.81241400  |
| H  | 3.97951900  | −2.05857300 | 1.40133900  |
| C  | 4.39284100  | −3.65581500 | 0.01148700  |
| H  | 4.39153100  | −4.40431900 | 0.81112300  |
| H  | 5.18207100  | −3.92872100 | −0.70200000 |
| C  | 3.04270100  | −3.54886900 | −0.70382900 |
| H  | 2.24717000  | −3.53351700 | 0.04951000  |
| H  | 2.83993600  | −4.38328200 | −1.38381300 |
| P  | −0.15336600 | −0.14520700 | 2.53438800  |
| P  | 1.46577000  | −1.37563200 | −1.71344700 |
| Os | 0.44392000  | −0.68014200 | 0.30046500  |
| H  | 1.77650700  | 0.13922100  | 0.60286600  |
| H  | 0.36520700  | −2.23243200 | 0.72339000  |
| H  | 1.64157300  | −1.47314000 | 0.97268700  |
| C  | −0.39496100 | 4.60896800  | −0.38442700 |
| C  | 1.03357600  | 4.25037600  | 0.16443200  |
| C  | −0.42401400 | 5.73746500  | −1.40618100 |
| H  | −1.45651600 | 5.92711400  | −1.71641500 |
| H  | −0.02370300 | 6.66287900  | −0.97765100 |
| H  | 0.15423200  | 5.48593300  | −2.29815200 |
| C  | 2.13508300  | 4.47050400  | −0.87256000 |
| H  | 2.33588100  | 5.53444600  | −1.03543000 |
| H  | 3.05560000  | 3.99385900  | −0.52234200 |
| H  | 1.86172100  | 4.01926500  | −1.82916900 |
| C  | −1.39558200 | 4.89592300  | 0.73779900  |
| H  | −1.21546500 | 5.86889700  | 1.20648000  |
| H  | −2.40810900 | 4.89247200  | 0.32285100  |
| H  | −1.34681300 | 4.12625600  | 1.51209600  |
| C  | 1.40937600  | 4.93310800  | 1.47370800  |
| H  | 2.41882900  | 4.63060900  | 1.76970400  |
| H  | 1.40056500  | 6.02326400  | 1.36429700  |
| H  | 0.72726500  | 4.65790300  | 2.28165200  |
| O  | −0.79510300 | 3.39020200  | −1.02056000 |
| O  | 0.92806600  | 2.84237600  | 0.39217600  |
| B  | −0.10423300 | 2.33093500  | −0.40737600 |
| O  | −0.40969800 | 1.06319800  | −0.56538200 |
| C  | −3.36709000 | −0.44536500 | −2.67278500 |
| C  | −4.00757200 | 0.23036300  | −1.39997700 |
| H  | −1.29215800 | −1.41654000 | −0.14673200 |
| C  | −3.20411200 | 0.48064600  | −3.86899100 |
| H  | −2.72986000 | −0.06372300 | −4.69111700 |
| H  | −4.17946500 | 0.83724000  | −4.21645400 |
| H  | −2.57898100 | 1.34231700  | −3.62678400 |
| C  | −3.78675200 | 1.73871400  | −1.33543200 |
| H  | −4.34879600 | 2.25296000  | −2.12139500 |
| H  | −4.14176800 | 2.10692600  | −0.36838000 |
| H  | −2.72972700 | 1.99954600  | −1.42395900 |
| C  | −4.05611300 | −1.74344900 | −3.09179500 |
| H  | −5.05019200 | −1.55636400 | −3.50902500 |
| H  | −3.44854600 | −2.23475500 | −3.85787000 |
| H  | −4.15558700 | −2.43307400 | −2.24802600 |
| C  | −5.47634500 | −0.09751700 | −1.17745700 |
| H  | −5.82483800 | 0.39683000  | −0.26586500 |

|                                                                    |             |             |             |
|--------------------------------------------------------------------|-------------|-------------|-------------|
| H                                                                  | -6.08212800 | 0.26842900  | -2.01304400 |
| H                                                                  | -5.64478800 | -1.17078300 | -1.06608300 |
| O                                                                  | -2.04921500 | -0.82197300 | -2.20845500 |
| O                                                                  | -3.24177100 | -0.36011900 | -0.31632400 |
| B                                                                  | -2.06711200 | -0.78737100 | -0.85000900 |
| <b>TS<sub>14,15-Os</sub></b>                                       |             |             |             |
| $G_{\text{solv}} = -2847.918200; E_{\text{solv}} = -2849.04300389$ |             |             |             |
| C                                                                  | -1.64014500 | -1.39791700 | 3.24700400  |
| H                                                                  | -1.70177400 | -1.07218600 | 4.29185300  |
| C                                                                  | -0.93836000 | -2.79270400 | 3.20290300  |
| H                                                                  | 0.00361200  | -2.78227100 | 2.65163600  |
| H                                                                  | -0.71170500 | -3.11823700 | 4.22474500  |
| C                                                                  | -1.94943000 | -3.74883500 | 2.55214100  |
| H                                                                  | -1.82783600 | -3.72499400 | 1.46104300  |
| H                                                                  | -1.82040400 | -4.78562500 | 2.88043600  |
| C                                                                  | -3.30759800 | -3.15290400 | 2.92210200  |
| H                                                                  | -3.54020800 | -3.36700000 | 3.97408300  |
| H                                                                  | -4.13204800 | -3.53682200 | 2.31167700  |
| C                                                                  | -3.07508900 | -1.65280500 | 2.71953100  |
| H                                                                  | -3.81748200 | -1.02974000 | 3.22761000  |
| H                                                                  | -3.14034600 | -1.42914600 | 1.64934000  |
| C                                                                  | 0.75519700  | 0.23503400  | 3.41750300  |
| H                                                                  | 0.34855900  | 0.45232300  | 4.41198200  |
| C                                                                  | 1.76083700  | -0.92970200 | 3.56622200  |
| H                                                                  | 1.49084900  | -1.60825800 | 4.38162500  |
| H                                                                  | 1.80533000  | -1.52064500 | 2.64587200  |
| C                                                                  | 3.11384400  | -0.24147000 | 3.77281900  |
| H                                                                  | 3.20086200  | 0.12606400  | 4.80432000  |
| H                                                                  | 3.96098300  | -0.90997500 | 3.58369400  |
| C                                                                  | 3.04071300  | 0.93533900  | 2.79841300  |
| H                                                                  | 3.19566800  | 0.56893900  | 1.77534100  |
| H                                                                  | 3.79265700  | 1.70799500  | 2.99162400  |
| C                                                                  | 1.60124300  | 1.45803800  | 2.94297200  |
| H                                                                  | 1.24086600  | 1.88640000  | 2.00410700  |
| H                                                                  | 1.55467000  | 2.24983200  | 3.70079800  |
| C                                                                  | -1.66241800 | 1.49848400  | 2.67584300  |
| H                                                                  | -0.97316000 | 2.27065600  | 2.31494500  |
| C                                                                  | -2.00029400 | 1.78822700  | 4.17133600  |
| H                                                                  | -1.70340200 | 0.98698400  | 4.85452000  |
| H                                                                  | -1.46528800 | 2.68759700  | 4.49852200  |
| C                                                                  | -3.51948400 | 2.02469100  | 4.21998100  |
| H                                                                  | -4.04079500 | 1.07342400  | 4.38865000  |
| H                                                                  | -3.81415800 | 2.70651100  | 5.02453400  |
| C                                                                  | -3.85590300 | 2.54664900  | 2.82160600  |
| H                                                                  | -3.55695800 | 3.60077600  | 2.73707300  |
| H                                                                  | -4.92380600 | 2.48721700  | 2.58297500  |
| C                                                                  | -2.99589500 | 1.66684200  | 1.90939400  |
| H                                                                  | -2.84035600 | 2.08623000  | 0.91394200  |
| H                                                                  | -3.49768600 | 0.71208700  | 1.75132200  |
| C                                                                  | 1.35254800  | -0.04904300 | -3.21415500 |
| H                                                                  | 1.93224800  | -0.58876500 | -3.97662000 |
| C                                                                  | 2.20983900  | 1.13481400  | -2.73624000 |
| H                                                                  | 3.25325100  | 0.86005500  | -2.55542200 |
| H                                                                  | 1.80248900  | 1.54835600  | -1.80415500 |
| C                                                                  | 2.04736000  | 2.13784100  | -3.88148300 |
| H                                                                  | 2.39994700  | 3.14397400  | -3.62983700 |
| H                                                                  | 2.62922800  | 1.79696500  | -4.74870300 |
| C                                                                  | 0.54507900  | 2.07711400  | -4.19148000 |

|    |             |             |             |
|----|-------------|-------------|-------------|
| H  | -0.00166000 | 2.75335400  | -3.52326100 |
| H  | 0.31616900  | 2.38044100  | -5.21874800 |
| C  | 0.12555400  | 0.61450900  | -3.89590200 |
| H  | -0.14249000 | 0.07273500  | -4.81003200 |
| H  | -0.74519500 | 0.59277700  | -3.23837000 |
| C  | -0.06780000 | -2.50074400 | -2.95959600 |
| H  | -0.86789800 | -1.87154300 | -3.36281700 |
| C  | -0.75523200 | -3.65690600 | -2.17898200 |
| H  | -0.27656200 | -3.85873200 | -1.21790400 |
| H  | -1.79093400 | -3.38074800 | -1.95611700 |
| C  | -0.68292500 | -4.89122500 | -3.10814400 |
| H  | 0.10862100  | -5.57050900 | -2.76776400 |
| H  | -1.61539500 | -5.46448500 | -3.11929200 |
| C  | -0.31128300 | -4.33340700 | -4.48842900 |
| H  | -1.20529900 | -3.94101300 | -4.99173800 |
| H  | 0.14002000  | -5.08272000 | -5.14734200 |
| C  | 0.63521000  | -3.17770700 | -4.15002600 |
| H  | 0.79551200  | -2.49154800 | -4.98857900 |
| H  | 1.61233300  | -3.58566300 | -3.86098200 |
| C  | 2.53694000  | -2.14599100 | -1.65379100 |
| H  | 2.95362200  | -2.33230000 | -2.65090600 |
| C  | 3.56733800  | -1.29773400 | -0.84529600 |
| H  | 4.41042900  | -1.03139300 | -1.49236400 |
| H  | 3.14137700  | -0.36406500 | -0.47008000 |
| C  | 4.03921100  | -2.19860000 | 0.30997400  |
| H  | 5.07867300  | -2.00736100 | 0.59612000  |
| H  | 3.41548900  | -2.01946800 | 1.19466600  |
| C  | 3.79871500  | -3.62269800 | -0.19689500 |
| H  | 3.78900000  | -4.37030300 | 0.60352200  |
| H  | 4.58169200  | -3.90784400 | -0.91248400 |
| C  | 2.44819200  | -3.49707200 | -0.90848700 |
| H  | 1.65476800  | -3.46794600 | -0.15332300 |
| H  | 2.23170400  | -4.32993400 | -1.58608300 |
| P  | -0.71918300 | -0.07066600 | 2.32006900  |
| P  | 0.90276000  | -1.30320200 | -1.92634000 |
| Os | -0.11996200 | -0.60420800 | 0.08597400  |
| H  | 1.20392900  | 0.24079600  | 0.37589400  |
| H  | -0.17407900 | -2.15365400 | 0.51673000  |
| H  | 1.09989700  | -1.36518200 | 0.75780300  |
| C  | -1.02829600 | 4.66185200  | -0.65835800 |
| C  | 0.38926200  | 4.31030800  | -0.07699900 |
| C  | -1.03808500 | 5.77727500  | -1.69434900 |
| H  | -2.06431100 | 5.96091600  | -2.02800500 |
| H  | -0.64856900 | 6.70849500  | -1.26859100 |
| H  | -0.44082700 | 5.51646900  | -2.57100200 |
| C  | 1.51211200  | 4.52305300  | -1.09188600 |
| H  | 1.71491900  | 5.58602000  | -1.25832200 |
| H  | 2.42549200  | 4.05057300  | -0.71827400 |
| H  | 1.26037800  | 4.06431600  | -2.05062800 |
| C  | -2.05132400 | 4.96016000  | 0.43996500  |
| H  | -1.88405700 | 5.94041600  | 0.89788700  |
| H  | -3.05581600 | 4.94601200  | 0.00631600  |
| H  | -2.01370300 | 4.20199600  | 1.22603700  |
| C  | 0.73653700  | 5.00500300  | 1.23388500  |
| H  | 1.73973800  | 4.70623400  | 1.55387800  |
| H  | 0.72933100  | 6.09402100  | 1.11385700  |
| H  | 0.03752300  | 4.73689500  | 2.02972500  |
| O  | -1.41556100 | 3.43429800  | -1.28807500 |

|                                                                       |             |             |             |
|-----------------------------------------------------------------------|-------------|-------------|-------------|
| O                                                                     | 0.28076700  | 2.90354200  | 0.16141400  |
| B                                                                     | −0.73692100 | 2.38566500  | −0.64923900 |
| O                                                                     | −1.03629800 | 1.11185400  | −0.79447400 |
| C                                                                     | −3.90162900 | −0.31981400 | −2.88267600 |
| C                                                                     | −4.55195800 | 0.34744300  | −1.60809200 |
| H                                                                     | −1.83832500 | −1.29211500 | −0.36793100 |
| C                                                                     | −3.77346800 | 0.60397300  | −4.08556200 |
| H                                                                     | −3.28995900 | 0.06817600  | −4.90803500 |
| H                                                                     | −4.76017600 | 0.93295600  | −4.42851200 |
| H                                                                     | −3.16958200 | 1.48323400  | −3.85223000 |
| C                                                                     | −4.40355100 | 1.86605500  | −1.56796000 |
| H                                                                     | −5.00744200 | 2.34087900  | −2.34790100 |
| H                                                                     | −4.75670700 | 2.22879200  | −0.59785400 |
| H                                                                     | −3.36424800 | 2.18043300  | −1.68250200 |
| C                                                                     | −4.56109200 | −1.63704200 | −3.29101000 |
| H                                                                     | −5.56467400 | −1.47922000 | −3.69769700 |
| H                                                                     | −3.94871700 | −2.11386000 | −4.06253500 |
| H                                                                     | −4.63121800 | −2.32670500 | −2.44439200 |
| C                                                                     | −6.00284300 | −0.04043100 | −1.36004100 |
| H                                                                     | −6.35996300 | 0.45203700  | −0.45063400 |
| H                                                                     | −6.63662000 | 0.28495700  | −2.19172700 |
| H                                                                     | −6.12189100 | −1.11808100 | −1.22924000 |
| O                                                                     | −2.57280200 | −0.66060100 | −2.43073000 |
| O                                                                     | −3.75147400 | −0.19490600 | −0.52920400 |
| B                                                                     | −2.56391100 | −0.59036400 | −1.06885600 |
| 15o <sub>s</sub>                                                      |             |             |             |
| $G_{\text{solv}} = -2847.940379$ ; $E_{\text{solv}} = -2849.06578602$ |             |             |             |
| C                                                                     | −1.37486400 | −2.02601300 | 3.07909500  |
| H                                                                     | −1.72461600 | −1.81801300 | 4.09658400  |
| C                                                                     | −0.00313000 | −2.76372500 | 3.18283800  |
| H                                                                     | 0.79452000  | −2.25072300 | 2.64070500  |
| H                                                                     | 0.30249700  | −2.82066100 | 4.23374200  |
| C                                                                     | −0.24248300 | −4.17438900 | 2.61479800  |
| H                                                                     | −0.00786300 | −4.18485900 | 1.54255700  |
| H                                                                     | 0.38163600  | −4.93400000 | 3.09681100  |
| C                                                                     | −1.74275800 | −4.41077800 | 2.80223400  |
| H                                                                     | −1.96006900 | −4.65633500 | 3.85057000  |
| H                                                                     | −2.13222700 | −5.22389900 | 2.18043100  |
| C                                                                     | −2.34238000 | −3.04837500 | 2.44132300  |
| H                                                                     | −3.37012900 | −2.91797300 | 2.79616700  |
| H                                                                     | −2.34962300 | −2.94138200 | 1.35091500  |
| C                                                                     | −0.45725400 | 0.65535700  | 3.49937300  |
| H                                                                     | −0.92431400 | 0.38683100  | 4.45795200  |
| C                                                                     | 1.06005700  | 0.43723900  | 3.63351900  |
| H                                                                     | 1.31161900  | −0.49785600 | 4.14274800  |
| H                                                                     | 1.52724000  | 0.42270500  | 2.64133000  |
| C                                                                     | 1.52124900  | 1.67767800  | 4.40250100  |
| H                                                                     | 1.24913600  | 1.58293800  | 5.46235400  |
| H                                                                     | 2.60504000  | 1.83065600  | 4.34952000  |
| C                                                                     | 0.72987600  | 2.81379800  | 3.74209700  |
| H                                                                     | 1.28278900  | 3.15547300  | 2.86284200  |
| H                                                                     | 0.59168800  | 3.67663900  | 4.40249500  |
| C                                                                     | −0.61192900 | 2.18672500  | 3.28971600  |
| H                                                                     | −0.82184300 | 2.43194800  | 2.24557600  |
| H                                                                     | −1.45696100 | 2.56580200  | 3.87499600  |
| C                                                                     | −3.02489700 | 0.29061800  | 2.30385700  |
| H                                                                     | −2.87257400 | 1.35150400  | 2.08245000  |
| C                                                                     | −3.79578600 | 0.16582300  | 3.64812900  |

|    |             |             |             |
|----|-------------|-------------|-------------|
| H  | -3.37061800 | -0.58387100 | 4.32225500  |
| H  | -3.76369300 | 1.12013100  | 4.18521400  |
| C  | -5.24647400 | -0.20646000 | 3.26230100  |
| H  | -5.39765800 | -1.28688000 | 3.38019400  |
| H  | -5.99114600 | 0.29419800  | 3.88942600  |
| C  | -5.36450000 | 0.15908100  | 1.77758400  |
| H  | -5.52330600 | 1.24075300  | 1.66792100  |
| H  | -6.19275200 | -0.35281200 | 1.27555000  |
| C  | -3.99143100 | -0.21751000 | 1.21593100  |
| H  | -3.77038700 | 0.24492500  | 0.25050900  |
| H  | -3.92873300 | -1.30361100 | 1.08435200  |
| C  | 0.75303400  | -0.28579700 | -3.49477400 |
| H  | 1.31182100  | -0.87686900 | -4.23509500 |
| C  | 1.46139200  | 1.06628900  | -3.32819400 |
| H  | 2.54533500  | 0.96599400  | -3.21234400 |
| H  | 1.06533400  | 1.58871100  | -2.45554200 |
| C  | 1.07182100  | 1.83429600  | -4.59731800 |
| H  | 1.14895400  | 2.91768200  | -4.45845600 |
| H  | 1.74592300  | 1.55839300  | -5.41827600 |
| C  | -0.37137600 | 1.38284000  | -4.91555400 |
| H  | -1.08806800 | 2.15363600  | -4.62092800 |
| H  | -0.50295600 | 1.20530400  | -5.98832200 |
| C  | -0.61676400 | 0.09659900  | -4.09015000 |
| H  | -1.03605000 | -0.71320100 | -4.69672700 |
| H  | -1.32153700 | 0.30818200  | -3.27937600 |
| C  | -0.30112500 | -2.78443000 | -2.67348000 |
| H  | -1.26220300 | -2.34105200 | -2.96260500 |
| C  | -0.60804000 | -3.95864500 | -1.69504200 |
| H  | -0.00050500 | -3.92427700 | -0.78950400 |
| H  | -1.64982200 | -3.89757500 | -1.36480900 |
| C  | -0.34667400 | -5.25418900 | -2.49228000 |
| H  | 0.64865600  | -5.64803700 | -2.24981000 |
| H  | -1.07064500 | -6.04229100 | -2.26231500 |
| C  | -0.37327000 | -4.82379500 | -3.96233800 |
| H  | -1.41045200 | -4.71731600 | -4.30689200 |
| H  | 0.12807400  | -5.53301500 | -4.62921500 |
| C  | 0.30279000  | -3.45061100 | -3.92713600 |
| H  | 0.13193900  | -2.86510200 | -4.83624600 |
| H  | 1.38697400  | -3.58561800 | -3.81925700 |
| C  | 2.37451100  | -1.91069400 | -1.77437200 |
| H  | 2.73808300  | -2.17807200 | -2.77386900 |
| C  | 3.29577900  | -0.80018300 | -1.18637300 |
| H  | 3.99264500  | -0.44624500 | -1.95426600 |
| H  | 2.72985400  | 0.06762600  | -0.83871800 |
| C  | 4.05363600  | -1.45304800 | -0.01396400 |
| H  | 5.07652800  | -1.07447200 | 0.08910600  |
| H  | 3.52535500  | -1.24213500 | 0.92397000  |
| C  | 3.99273000  | -2.95496600 | -0.30600100 |
| H  | 4.18969400  | -3.57382000 | 0.57591600  |
| H  | 4.72823500  | -3.22387700 | -1.07626400 |
| C  | 2.57079200  | -3.12900000 | -0.84730400 |
| H  | 1.87013600  | -3.08517800 | -0.00604700 |
| H  | 2.41376700  | -4.07880800 | -1.36969400 |
| P  | -1.30100000 | -0.38223300 | 2.21048800  |
| P  | 0.62082600  | -1.33037700 | -1.96651700 |
| Os | -0.35863700 | -0.56129300 | 0.04726600  |
| H  | 1.01853800  | -1.01891200 | 0.77526100  |
| H  | -1.52950200 | -1.59521300 | -0.28205100 |

|                                                                      |             |             |             |
|----------------------------------------------------------------------|-------------|-------------|-------------|
| H                                                                    | -0.20918900 | -2.09292500 | 0.44215000  |
| C                                                                    | 2.55100900  | 4.31388100  | -0.17983800 |
| C                                                                    | 3.40513200  | 3.12134400  | 0.40630000  |
| C                                                                    | 3.19374900  | 5.03353100  | -1.35790800 |
| H                                                                    | 2.53102400  | 5.83232300  | -1.70363100 |
| H                                                                    | 4.14580900  | 5.48713000  | -1.06292800 |
| H                                                                    | 3.37031000  | 4.35771500  | -2.19723300 |
| C                                                                    | 4.34777200  | 2.49435700  | -0.62033900 |
| H                                                                    | 5.17129300  | 3.16930100  | -0.87226300 |
| H                                                                    | 4.76941200  | 1.57722200  | -0.19987400 |
| H                                                                    | 3.81843400  | 2.22963900  | -1.54012000 |
| C                                                                    | 2.11228400  | 5.33450900  | 0.87053700  |
| H                                                                    | 2.96231500  | 5.90684100  | 1.25411700  |
| H                                                                    | 1.40731600  | 6.03370700  | 0.41153100  |
| H                                                                    | 1.60471900  | 4.85739800  | 1.71282500  |
| C                                                                    | 4.16795900  | 3.45195600  | 1.68100100  |
| H                                                                    | 4.70017400  | 2.56181200  | 2.02951100  |
| H                                                                    | 4.90635400  | 4.23955900  | 1.49732800  |
| H                                                                    | 3.49943600  | 3.78046600  | 2.47946300  |
| O                                                                    | 1.36034500  | 3.64955900  | -0.64905300 |
| O                                                                    | 2.40222600  | 2.13139600  | 0.71800300  |
| B                                                                    | 1.28089100  | 2.43650700  | -0.01224700 |
| O                                                                    | 0.21897000  | 1.60295300  | -0.08326000 |
| C                                                                    | -2.41282900 | 3.18348400  | -1.93843100 |
| C                                                                    | -2.62009100 | 3.57343500  | -0.43176100 |
| H                                                                    | -1.58057300 | 0.49645800  | -0.75208800 |
| C                                                                    | -2.20671300 | 4.37202800  | -2.86893000 |
| H                                                                    | -2.12692500 | 4.02982500  | -3.90541200 |
| H                                                                    | -3.05258700 | 5.06626700  | -2.80935600 |
| H                                                                    | -1.28950900 | 4.91026500  | -2.62047700 |
| C                                                                    | -1.81927100 | 4.81478400  | -0.02548300 |
| H                                                                    | -2.24113500 | 5.73150000  | -0.45169700 |
| H                                                                    | -1.83983200 | 4.90452000  | 1.06586500  |
| H                                                                    | -0.77596600 | 4.72294500  | -0.33977400 |
| C                                                                    | -3.53274500 | 2.28598300  | -2.47780800 |
| H                                                                    | -4.47478000 | 2.83181700  | -2.59499600 |
| H                                                                    | -3.23536600 | 1.90345000  | -3.45910500 |
| H                                                                    | -3.70745100 | 1.42805000  | -1.82075300 |
| C                                                                    | -4.07613800 | 3.72777100  | -0.00854300 |
| H                                                                    | -4.12474800 | 3.99175900  | 1.05313100  |
| H                                                                    | -4.57162900 | 4.52291000  | -0.57704000 |
| H                                                                    | -4.63077400 | 2.79693600  | -0.14965000 |
| O                                                                    | -1.21030000 | 2.41764700  | -1.89336200 |
| O                                                                    | -2.06843700 | 2.44996300  | 0.25062800  |
| B                                                                    | -1.14401000 | 1.79800200  | -0.61775200 |
| TS <sub>15,16-Os</sub>                                               |             |             |             |
| G <sub>solv</sub> = -2847.934558; E <sub>solv</sub> = -2849.05779747 |             |             |             |
| C                                                                    | -1.35321500 | -1.87864600 | 3.05560200  |
| H                                                                    | -1.72256300 | -1.67605700 | 4.06749300  |
| C                                                                    | 0.02193900  | -2.60765500 | 3.17877400  |
| H                                                                    | 0.81653200  | -2.09117100 | 2.63536300  |
| H                                                                    | 0.31914200  | -2.65546700 | 4.23276500  |
| C                                                                    | -0.20128500 | -4.02340800 | 2.61658800  |
| H                                                                    | 0.05299400  | -4.03845600 | 1.54904600  |
| H                                                                    | 0.41709800  | -4.77740500 | 3.11489200  |
| C                                                                    | -1.70351500 | -4.26593300 | 2.77688400  |
| H                                                                    | -1.93994100 | -4.50864200 | 3.82198800  |
| H                                                                    | -2.07796800 | -5.08295300 | 2.15068200  |

|   |             |             |             |
|---|-------------|-------------|-------------|
| C | -2.30143800 | -2.90732500 | 2.39968100  |
| H | -3.33711900 | -2.78340100 | 2.73285700  |
| H | -2.28442400 | -2.80169300 | 1.30930300  |
| C | -0.42401300 | 0.78231800  | 3.51430000  |
| H | -0.91827100 | 0.50851500  | 4.45698600  |
| C | 1.08698400  | 0.54539800  | 3.68854700  |
| H | 1.31035100  | -0.38707500 | 4.21487700  |
| H | 1.57615100  | 0.50723700  | 2.70779900  |
| C | 1.55128000  | 1.78648100  | 4.45423400  |
| H | 1.24878200  | 1.71459500  | 5.50776400  |
| H | 2.63900100  | 1.91903100  | 4.42871100  |
| C | 0.79785800  | 2.92334300  | 3.75525200  |
| H | 1.36209000  | 3.21306800  | 2.86386200  |
| H | 0.68576000  | 3.81558800  | 4.38101600  |
| C | -0.55978000 | 2.31898900  | 3.32423800  |
| H | -0.78954500 | 2.58550600  | 2.29026200  |
| H | -1.38532900 | 2.70305500  | 3.93380800  |
| C | -2.97606000 | 0.46077200  | 2.29746800  |
| H | -2.82188700 | 1.51562800  | 2.04636900  |
| C | -3.71803700 | 0.37829500  | 3.66356500  |
| H | -3.23523200 | -0.29348200 | 4.37979500  |
| H | -3.73943300 | 1.36795000  | 4.13372900  |
| C | -5.14820800 | -0.10293000 | 3.33637200  |
| H | -5.21581500 | -1.19019400 | 3.46924200  |
| H | -5.90538800 | 0.35040600  | 3.98451000  |
| C | -5.33722800 | 0.23519400  | 1.85381200  |
| H | -5.55512900 | 1.30656000  | 1.74033200  |
| H | -6.15655300 | -0.32245200 | 1.38678400  |
| C | -3.96801000 | -0.08536300 | 1.24862300  |
| H | -3.79797600 | 0.37029100  | 0.27055600  |
| H | -3.86603100 | -1.16743100 | 1.11595900  |
| C | 0.85079300  | -0.11842600 | -3.47381400 |
| H | 1.39345600  | -0.71774700 | -4.21921400 |
| C | 1.60493200  | 1.20563800  | -3.28855600 |
| H | 2.68323900  | 1.06839900  | -3.16213800 |
| H | 1.22016600  | 1.72803500  | -2.40935500 |
| C | 1.25192300  | 1.99921100  | -4.55176900 |
| H | 1.38808800  | 3.07732500  | -4.41529000 |
| H | 1.90661900  | 1.68692300  | -5.37533200 |
| C | -0.21371700 | 1.62223300  | -4.86074100 |
| H | -0.88748100 | 2.41698200  | -4.52951400 |
| H | -0.37114700 | 1.48648300  | -5.93608800 |
| C | -0.50113700 | 0.32277500  | -4.06862100 |
| H | -0.94249400 | -0.45807100 | -4.69714300 |
| H | -1.20138700 | 0.52706200  | -3.25223600 |
| C | -0.29366200 | -2.58622000 | -2.69475500 |
| H | -1.23843300 | -2.10503000 | -2.97664700 |
| C | -0.64353800 | -3.76411600 | -1.73469700 |
| H | -0.04466500 | -3.75814000 | -0.82285300 |
| H | -1.68613600 | -3.67574900 | -1.41337300 |
| C | -0.41534200 | -5.05621200 | -2.54694400 |
| H | 0.56902800  | -5.47965800 | -2.30873000 |
| H | -1.16019000 | -5.82801400 | -2.32793400 |
| C | -0.42840800 | -4.60641100 | -4.01138500 |
| H | -1.46216200 | -4.46441400 | -4.35386900 |
| H | 0.05128100  | -5.32176300 | -4.68790800 |
| C | 0.28882500  | -3.25466800 | -3.95714400 |
| H | 0.13694800  | -2.65214200 | -4.85875300 |

|    |             |             |             |
|----|-------------|-------------|-------------|
| H  | 1.36822000  | −3.42522000 | −3.85197900 |
| C  | 2.40557500  | −1.82375800 | −1.78370800 |
| H  | 2.74912400  | −2.10522300 | −2.78668000 |
| C  | 3.37794500  | −0.75406200 | −1.20426700 |
| H  | 4.07729800  | −0.42106800 | −1.97994100 |
| H  | 2.84487000  | 0.12778900  | −0.84022000 |
| C  | 4.12484600  | −1.44017200 | −0.04358200 |
| H  | 5.16570300  | −1.10843200 | 0.04414500  |
| H  | 3.61699900  | −1.20521000 | 0.89988700  |
| C  | 3.99275700  | −2.93848300 | −0.33171400 |
| H  | 4.17039800  | −3.56352200 | 0.55014700  |
| H  | 4.70771400  | −3.24268600 | −1.10849500 |
| C  | 2.55888000  | −3.04810600 | −0.85773500 |
| H  | 1.86904100  | −2.96821000 | −0.01050700 |
| H  | 2.35468300  | −3.99082400 | −1.37697100 |
| P  | −1.25465800 | −0.23106600 | 2.18915900  |
| P  | 0.67002400  | −1.17434000 | −1.95321800 |
| Os | −0.30155500 | −0.40980000 | 0.04509300  |
| H  | 1.17194200  | −0.64379500 | 0.78965700  |
| H  | −1.46480500 | −1.45397400 | −0.27327700 |
| H  | −0.08025300 | −1.92643400 | 0.46932700  |
| C  | 2.73521200  | 4.42136700  | −0.07687300 |
| C  | 3.52277800  | 3.15236600  | 0.44993800  |
| C  | 3.40267400  | 5.13930100  | −1.24179100 |
| H  | 2.78489400  | 5.98765700  | −1.55013900 |
| H  | 4.38382700  | 5.52488200  | −0.94623700 |
| H  | 3.52776600  | 4.48258800  | −2.10509500 |
| C  | 4.44456200  | 2.53178400  | −0.59797100 |
| H  | 5.29576400  | 3.18329000  | −0.81647400 |
| H  | 4.82678500  | 1.58213400  | −0.21469600 |
| H  | 3.91197800  | 2.32638900  | −1.53083300 |
| C  | 2.37904000  | 5.42878000  | 1.01513000  |
| H  | 3.27149600  | 5.92833600  | 1.40361400  |
| H  | 1.71713100  | 6.18969500  | 0.59163300  |
| H  | 1.85308700  | 4.95682800  | 1.84870200  |
| C  | 4.28315100  | 3.37313500  | 1.74912800  |
| H  | 4.75785800  | 2.43684000  | 2.05649800  |
| H  | 5.06762700  | 4.12516200  | 1.61472400  |
| H  | 3.62298800  | 3.69820200  | 2.55564200  |
| O  | 1.49212500  | 3.85254300  | −0.54842300 |
| O  | 2.46829900  | 2.19285100  | 0.70077800  |
| B  | 1.37286100  | 2.60852700  | 0.00834400  |
| O  | 0.23719600  | 1.85943900  | −0.12194300 |
| C  | −2.49869900 | 3.32196600  | −1.97198000 |
| C  | −2.75686800 | 3.76699100  | −0.48346800 |
| H  | −1.60134100 | 0.36879800  | −0.74426800 |
| C  | −2.48201800 | 4.46933000  | −2.97144200 |
| H  | −2.33147100 | 4.08157900  | −3.98297100 |
| H  | −3.43814000 | 5.00347400  | −2.95684800 |
| H  | −1.67907900 | 5.17769900  | −2.75729800 |
| C  | −2.23239300 | 5.16973700  | −0.17377900 |
| H  | −2.83382700 | 5.94426300  | −0.65916700 |
| H  | −2.27356300 | 5.33017700  | 0.90779400  |
| H  | −1.19085500 | 5.28001800  | −0.49086900 |
| C  | −3.44750600 | 2.22310700  | −2.44940000 |
| H  | −4.47061300 | 2.59802200  | −2.54945000 |
| H  | −3.11716000 | 1.87014300  | −3.43041400 |
| H  | −3.44562700 | 1.36798900  | −1.76836600 |

|                                                                    |             |             |             |
|--------------------------------------------------------------------|-------------|-------------|-------------|
| C                                                                  | −4.19693100 | 3.62119700  | −0.01666200 |
| H                                                                  | −4.27802100 | 3.93271200  | 1.02920400  |
| H                                                                  | −4.86303200 | 4.25554400  | −0.61128400 |
| H                                                                  | −4.53845800 | 2.58690500  | −0.09146500 |
| O                                                                  | −1.17328300 | 2.75224500  | −1.89643100 |
| O                                                                  | −1.93425200 | 2.84990900  | 0.26445700  |
| B                                                                  | −0.98428300 | 2.35874400  | −0.59834500 |
| <b>16os</b>                                                        |             |             |             |
| $G_{\text{solv}} = -2847.936142; E_{\text{solv}} = -2849.05786861$ |             |             |             |
| C                                                                  | −1.25146200 | −2.29384800 | 3.08596800  |
| H                                                                  | −1.62645200 | −2.09231200 | 4.09603700  |
| C                                                                  | 0.12548600  | −3.01863600 | 3.21502900  |
| H                                                                  | 0.92061200  | −2.49879400 | 2.67529300  |
| H                                                                  | 0.41816000  | −3.06632600 | 4.27031500  |
| C                                                                  | −0.09053600 | −4.43459200 | 2.65050200  |
| H                                                                  | 0.16862400  | −4.44777700 | 1.58413000  |
| H                                                                  | 0.52791800  | −5.18707300 | 3.15102500  |
| C                                                                  | −1.59268700 | −4.68217500 | 2.80351200  |
| H                                                                  | −1.83328800 | −4.92678400 | 3.84724200  |
| H                                                                  | −1.96156700 | −5.49974200 | 2.17469200  |
| C                                                                  | −2.19327300 | −3.32514600 | 2.42490900  |
| H                                                                  | −3.23091300 | −3.20523100 | 2.75344400  |
| H                                                                  | −2.17151900 | −3.21815800 | 1.33474900  |
| C                                                                  | −0.32415900 | 0.36639600  | 3.54956900  |
| H                                                                  | −0.82141700 | 0.09091300  | 4.49015400  |
| C                                                                  | 1.18650500  | 0.13314000  | 3.73011800  |
| H                                                                  | 1.40990200  | −0.79950000 | 4.25613500  |
| H                                                                  | 1.67940200  | 0.09744200  | 2.75118700  |
| C                                                                  | 1.64424100  | 1.37405700  | 4.50003500  |
| H                                                                  | 1.33704200  | 1.29994500  | 5.55205300  |
| H                                                                  | 2.73175700  | 1.50935000  | 4.47992300  |
| C                                                                  | 0.89131100  | 2.51023500  | 3.79945200  |
| H                                                                  | 1.45886400  | 2.80311000  | 2.91115900  |
| H                                                                  | 0.77378400  | 3.40112500  | 4.42617600  |
| C                                                                  | −0.46245400 | 1.90286800  | 3.36070000  |
| H                                                                  | −0.68669900 | 2.17005900  | 2.32576700  |
| H                                                                  | −1.29247200 | 2.28463600  | 3.96563100  |
| C                                                                  | −2.87058200 | 0.04809000  | 2.32455300  |
| H                                                                  | −2.71580300 | 1.10195400  | 2.06859400  |
| C                                                                  | −3.61075100 | −0.02684600 | 3.69243700  |
| H                                                                  | −3.12173800 | −0.68743700 | 4.41480400  |
| H                                                                  | −3.63959600 | 0.96732500  | 4.15265700  |
| C                                                                  | −5.03740500 | −0.52187000 | 3.37220100  |
| H                                                                  | −5.09472400 | −1.60933900 | 3.50833400  |
| H                                                                  | −5.79635000 | −0.07334300 | 4.02165300  |
| C                                                                  | −5.23358700 | −0.18963200 | 1.88949300  |
| H                                                                  | −5.45816000 | 0.88020200  | 1.77374900  |
| H                                                                  | −6.05120200 | −0.75329000 | 1.42669800  |
| C                                                                  | −3.86458300 | −0.50423400 | 1.28058100  |
| H                                                                  | −3.70145100 | −0.05038900 | 0.30061300  |
| H                                                                  | −3.75740400 | −1.58582900 | 1.14901600  |
| C                                                                  | 0.94790100  | −0.51544300 | −3.43888800 |
| H                                                                  | 1.48621700  | −1.10939700 | −4.19173900 |
| C                                                                  | 1.70024300  | 0.80920500  | −3.25043500 |
| H                                                                  | 2.77970800  | 0.67403400  | −3.13254900 |
| H                                                                  | 1.32105000  | 1.32263900  | −2.36360700 |
| C                                                                  | 1.33750300  | 1.61313700  | −4.50476800 |
| H                                                                  | 1.46013500  | 2.69096200  | −4.35431300 |

|    |             |             |             |
|----|-------------|-------------|-------------|
| H  | 1.99725200  | 1.31999000  | −5.33117800 |
| C  | −0.12335400 | 1.22229800  | −4.82243100 |
| H  | −0.80757300 | 2.01539100  | −4.50857700 |
| H  | −0.26822500 | 1.07282100  | −5.89773000 |
| C  | −0.40812700 | −0.07143300 | −4.02078000 |
| H  | −0.86159500 | −0.85276100 | −4.64002600 |
| H  | −1.09702900 | 0.14004500  | −3.19663600 |
| C  | −0.18109400 | −2.99283200 | −2.66542900 |
| H  | −1.12977000 | −2.51499000 | −2.93961600 |
| C  | −0.52000800 | −4.17635400 | −1.70810400 |
| H  | 0.08008500  | −4.16863700 | −0.79708000 |
| H  | −1.56279600 | −4.09684200 | −1.38501800 |
| C  | −0.28454500 | −5.46407700 | −2.52494400 |
| H  | 0.70483500  | −5.87937300 | −2.29325700 |
| H  | −1.02132300 | −6.24312400 | −2.30412100 |
| C  | −0.30958000 | −5.01011600 | −3.98793700 |
| H  | −1.34644600 | −4.87496200 | −4.32375600 |
| H  | 0.17146900  | −5.71981400 | −4.66946600 |
| C  | 0.39776200  | −3.65312300 | −3.93381100 |
| H  | 0.23538100  | −3.04885100 | −4.83246300 |
| H  | 1.47907200  | −3.81607500 | −3.83658400 |
| C  | 2.51889600  | −2.22138900 | −1.76476100 |
| H  | 2.85784700  | −2.49930100 | −2.77028800 |
| C  | 3.49019100  | −1.14892500 | −1.18864500 |
| H  | 4.18527900  | −0.81312600 | −1.96702800 |
| H  | 2.95543600  | −0.26947300 | −0.82124600 |
| C  | 4.24419200  | −1.83321100 | −0.03164300 |
| H  | 5.28372000  | −1.49652300 | 0.05349400  |
| H  | 3.73746000  | −1.60234300 | 0.91347500  |
| C  | 4.11835400  | −3.33156600 | −0.32200900 |
| H  | 4.30268800  | −3.95742000 | 0.55791700  |
| H  | 4.83139600  | −3.63088600 | −1.10246400 |
| C  | 2.68268900  | −3.44673400 | −0.84186200 |
| H  | 1.99666100  | −3.37098100 | 0.00887200  |
| H  | 2.48016600  | −4.38955100 | −1.36155700 |
| P  | −1.14909000 | −0.64643900 | 2.21931800  |
| P  | 0.77890800  | −1.57937600 | −1.92172100 |
| Os | −0.18933700 | −0.82672900 | 0.07906000  |
| H  | 1.29816300  | −1.00128400 | 0.82141600  |
| H  | −1.32840700 | −1.90021200 | −0.22030200 |
| H  | 0.07771200  | −2.33156900 | 0.51372600  |
| C  | 2.84094900  | 4.02358300  | −0.02615600 |
| C  | 3.62120900  | 2.74770900  | 0.49448600  |
| C  | 3.51587200  | 4.74782300  | −1.18268400 |
| H  | 2.90267600  | 5.60091600  | −1.48709300 |
| H  | 4.49723400  | 5.12728800  | −0.88005700 |
| H  | 3.64207800  | 4.09722400  | −2.05043600 |
| C  | 4.54457700  | 2.13110600  | −0.55418500 |
| H  | 5.39843900  | 2.78157900  | −0.76520700 |
| H  | 4.92267900  | 1.17792100  | −0.17583000 |
| H  | 4.01478100  | 1.93358000  | −1.49032800 |
| C  | 2.48289300  | 5.02379500  | 1.07178000  |
| H  | 3.37503200  | 5.51893300  | 1.46655600  |
| H  | 1.82360700  | 5.78875900  | 0.65141800  |
| H  | 1.95353900  | 4.54699800  | 1.90045400  |
| C  | 4.37702800  | 2.95570500  | 1.79838700  |
| H  | 4.84653100  | 2.01515600  | 2.10062100  |
| H  | 5.16498200  | 3.70561700  | 1.67288700  |

|                                                                       |             |             |             |
|-----------------------------------------------------------------------|-------------|-------------|-------------|
| H                                                                     | 3.71478000  | 3.27723000  | 2.60456700  |
| O                                                                     | 1.59797300  | 3.46204800  | −0.50724800 |
| O                                                                     | 2.56164000  | 1.79045300  | 0.73486600  |
| B                                                                     | 1.47083000  | 2.21545600  | 0.04290500  |
| O                                                                     | 0.32327000  | 1.48219100  | −0.09588300 |
| C                                                                     | −2.41640800 | 2.94498300  | −1.93736800 |
| C                                                                     | −2.67802300 | 3.39419700  | −0.44985200 |
| H                                                                     | −1.51746800 | −0.12363100 | −0.71738500 |
| C                                                                     | −2.42187000 | 4.08564600  | −2.94411400 |
| H                                                                     | −2.26099600 | 3.69357000  | −3.95232200 |
| H                                                                     | −3.38907300 | 4.59937400  | −2.93482600 |
| H                                                                     | −1.63484300 | 4.81277400  | −2.73396600 |
| C                                                                     | −2.18961700 | 4.81200000  | −0.15119900 |
| H                                                                     | −2.81266400 | 5.56632700  | −0.64088600 |
| H                                                                     | −2.23278900 | 4.97947700  | 0.92912000  |
| H                                                                     | −1.15215100 | 4.94906000  | −0.47154100 |
| C                                                                     | −3.34377700 | 1.82469800  | −2.40520100 |
| H                                                                     | −4.37572200 | 2.17654700  | −2.49722300 |
| H                                                                     | −3.01376300 | 1.47724600  | −3.38822100 |
| H                                                                     | −3.31585000 | 0.97113400  | −1.72271500 |
| C                                                                     | −4.11003900 | 3.21109700  | 0.02742800  |
| H                                                                     | −4.19230500 | 3.52495900  | 1.07239700  |
| H                                                                     | −4.79682400 | 3.82450400  | −0.56543500 |
| H                                                                     | −4.42374600 | 2.16769000  | −0.04076900 |
| O                                                                     | −1.07943100 | 2.39699100  | −1.86326500 |
| O                                                                     | −1.82533300 | 2.50386700  | 0.30062400  |
| B                                                                     | −0.87160800 | 2.03709200  | −0.56329900 |
| <b>1Os-HBpin</b>                                                      |             |             |             |
| $G_{\text{solv}} = -2362.223963$ ; $E_{\text{solv}} = -2363.17615466$ |             |             |             |
| C                                                                     | 16.04781400 | 3.72899800  | 7.04819200  |
| H                                                                     | 16.91194900 | 4.10309500  | 7.61035100  |
| C                                                                     | 16.57818700 | 2.99612600  | 5.77686500  |
| H                                                                     | 16.17427200 | 3.40477800  | 4.84848700  |
| H                                                                     | 17.66799200 | 3.09659500  | 5.72694700  |
| C                                                                     | 16.18202100 | 1.51884400  | 5.95028300  |
| H                                                                     | 15.20150900 | 1.34478800  | 5.48810500  |
| H                                                                     | 16.89735000 | 0.83345000  | 5.48381200  |
| C                                                                     | 16.05791300 | 1.33630900  | 7.46441000  |
| H                                                                     | 17.05368100 | 1.26850800  | 7.92309000  |
| H                                                                     | 15.49680100 | 0.43943200  | 7.74717800  |
| C                                                                     | 15.36081700 | 2.63049900  | 7.89176100  |
| H                                                                     | 15.42670200 | 2.82946700  | 8.96650200  |
| H                                                                     | 14.29932600 | 2.55946300  | 7.62977400  |
| C                                                                     | 16.22317600 | 6.47368400  | 6.16826400  |
| H                                                                     | 16.98937300 | 6.51734100  | 6.95174900  |
| C                                                                     | 16.90689600 | 6.14536800  | 4.81749700  |
| H                                                                     | 17.84267100 | 5.59351400  | 4.95121400  |
| H                                                                     | 16.24596000 | 5.53271700  | 4.19487200  |
| C                                                                     | 17.09532800 | 7.50483800  | 4.13434200  |
| H                                                                     | 17.96251700 | 8.03021000  | 4.55665100  |
| H                                                                     | 17.25241900 | 7.41491400  | 3.05419000  |
| C                                                                     | 15.80645000 | 8.24214900  | 4.50212700  |
| H                                                                     | 14.97566800 | 7.84411600  | 3.90498500  |
| H                                                                     | 15.85607000 | 9.32276000  | 4.32976100  |
| C                                                                     | 15.59213200 | 7.88623000  | 5.98105100  |
| H                                                                     | 14.53504900 | 7.91636000  | 6.25343700  |
| H                                                                     | 16.11264500 | 8.60676400  | 6.62415900  |
| C                                                                     | 14.58913800 | 5.84744300  | 8.43320100  |

|    |             |             |             |
|----|-------------|-------------|-------------|
| H  | 14.27026200 | 6.87660800  | 8.24311200  |
| C  | 15.72080000 | 5.89688200  | 9.47765100  |
| H  | 16.30498100 | 4.96854300  | 9.48856200  |
| H  | 16.41641800 | 6.72428800  | 9.30190600  |
| C  | 14.95775400 | 6.02247300  | 10.80046900 |
| H  | 15.57920600 | 5.81450800  | 11.67804200 |
| H  | 14.56375700 | 7.04245000  | 10.90391600 |
| C  | 13.80443700 | 5.02584900  | 10.62811200 |
| H  | 12.96879100 | 5.22069500  | 11.30806700 |
| H  | 14.16679000 | 4.01280400  | 10.84472100 |
| C  | 13.39939300 | 5.13690000  | 9.14161700  |
| H  | 12.49762400 | 5.74310200  | 9.01202900  |
| H  | 13.17421900 | 4.15698100  | 8.71374000  |
| C  | 10.00488200 | 3.23833600  | 4.33569800  |
| H  | 9.53429100  | 2.72277200  | 3.49051000  |
| C  | 9.04870500  | 4.34639300  | 4.84199000  |
| H  | 8.38048300  | 4.70331400  | 4.05115000  |
| H  | 9.61310300  | 5.20860700  | 5.20591600  |
| C  | 8.30636000  | 3.71121800  | 6.02285300  |
| H  | 7.85029200  | 4.45651200  | 6.68429600  |
| H  | 7.50777500  | 3.04532900  | 5.66830400  |
| C  | 9.40626500  | 2.89442400  | 6.70181800  |
| H  | 10.08816400 | 3.57115000  | 7.23385600  |
| H  | 9.02853600  | 2.16171300  | 7.42273500  |
| C  | 10.14881500 | 2.24154400  | 5.52704300  |
| H  | 9.67929300  | 1.28649900  | 5.26364200  |
| H  | 11.19002800 | 2.02959600  | 5.78791600  |
| C  | 12.34477900 | 2.24163200  | 3.06876900  |
| H  | 12.38870500 | 1.61763600  | 3.96945000  |
| C  | 13.78752100 | 2.29354400  | 2.47468200  |
| H  | 14.13626300 | 3.31020000  | 2.28854500  |
| H  | 14.49150300 | 1.85940600  | 3.19188000  |
| C  | 13.74084000 | 1.45821600  | 1.17953300  |
| H  | 13.59209400 | 2.11531800  | 0.31293200  |
| H  | 14.66628200 | 0.89963500  | 1.00677300  |
| C  | 12.51400900 | 0.55606600  | 1.34352300  |
| H  | 12.75043000 | −0.28677900 | 2.00672600  |
| H  | 12.15010600 | 0.14342500  | 0.39661500  |
| C  | 11.50100900 | 1.48299400  | 2.02174600  |
| H  | 10.66244000 | 0.94336900  | 2.47332800  |
| H  | 11.08720800 | 2.16832600  | 1.27148400  |
| C  | 11.20455800 | 4.79978700  | 2.19272400  |
| H  | 10.50885400 | 4.17075800  | 1.62505600  |
| C  | 10.51906000 | 6.17292800  | 2.46754900  |
| H  | 9.49829300  | 6.15483300  | 2.06828500  |
| H  | 10.44795100 | 6.41610000  | 3.52702000  |
| C  | 11.36739400 | 7.22105700  | 1.72538100  |
| H  | 10.77307200 | 8.07118400  | 1.37396900  |
| H  | 12.13955000 | 7.61239200  | 2.40107700  |
| C  | 12.03569600 | 6.43511200  | 0.59599300  |
| H  | 12.89795700 | 6.94929700  | 0.15812500  |
| H  | 11.31468600 | 6.24131300  | −0.20959100 |
| C  | 12.41941400 | 5.12727500  | 1.29319000  |
| H  | 13.30770500 | 5.30920500  | 1.91003700  |
| H  | 12.65362900 | 4.31356900  | 0.59901100  |
| P  | 14.97615900 | 5.21547300  | 6.73160800  |
| P  | 11.65234800 | 3.84629700  | 3.72298200  |
| Os | 13.14642000 | 4.79111900  | 5.29633600  |

---

|   |             |             |            |
|---|-------------|-------------|------------|
| H | 14.15623700 | 4.99059300  | 4.03372700 |
| H | 12.81462600 | 6.49261600  | 4.91787000 |
| H | 12.90555800 | 3.42260600  | 6.14593500 |
| H | 14.04033100 | 3.50942900  | 4.88963200 |
| C | 10.23708000 | 8.09411300  | 6.45940500 |
| C | 11.57234500 | 8.66423800  | 7.03869600 |
| H | 11.90375600 | 5.32806800  | 6.43630900 |
| C | 9.38636300  | 9.09678300  | 5.69374500 |
| H | 8.47612300  | 8.60854100  | 5.33187600 |
| H | 9.09059900  | 9.93067000  | 6.33973600 |
| H | 9.92124400  | 9.49413900  | 4.82833600 |
| C | 12.20618000 | 9.72569700  | 6.13468500 |
| H | 11.63146900 | 10.65733500 | 6.14001700 |
| H | 13.21480200 | 9.94702300  | 6.49606100 |
| H | 12.28716000 | 9.37104400  | 5.10224600 |
| C | 9.38737300  | 7.37670100  | 7.51220700 |
| H | 8.93648500  | 8.07996400  | 8.21964000 |
| H | 8.58133000  | 6.83741200  | 7.00589200 |
| H | 9.98056000  | 6.64770100  | 8.07364000 |
| C | 11.48500600 | 9.17787200  | 8.46860300 |
| H | 12.46396500 | 9.54869300  | 8.78862300 |
| H | 10.76875800 | 10.00351100 | 8.54286000 |
| H | 11.18265000 | 8.38770600  | 9.15958100 |
| O | 10.71891100 | 7.10549500  | 5.54315700 |
| O | 12.41711000 | 7.50715000  | 7.01767600 |
| B | 11.96613200 | 6.64069900  | 6.00343300 |

---

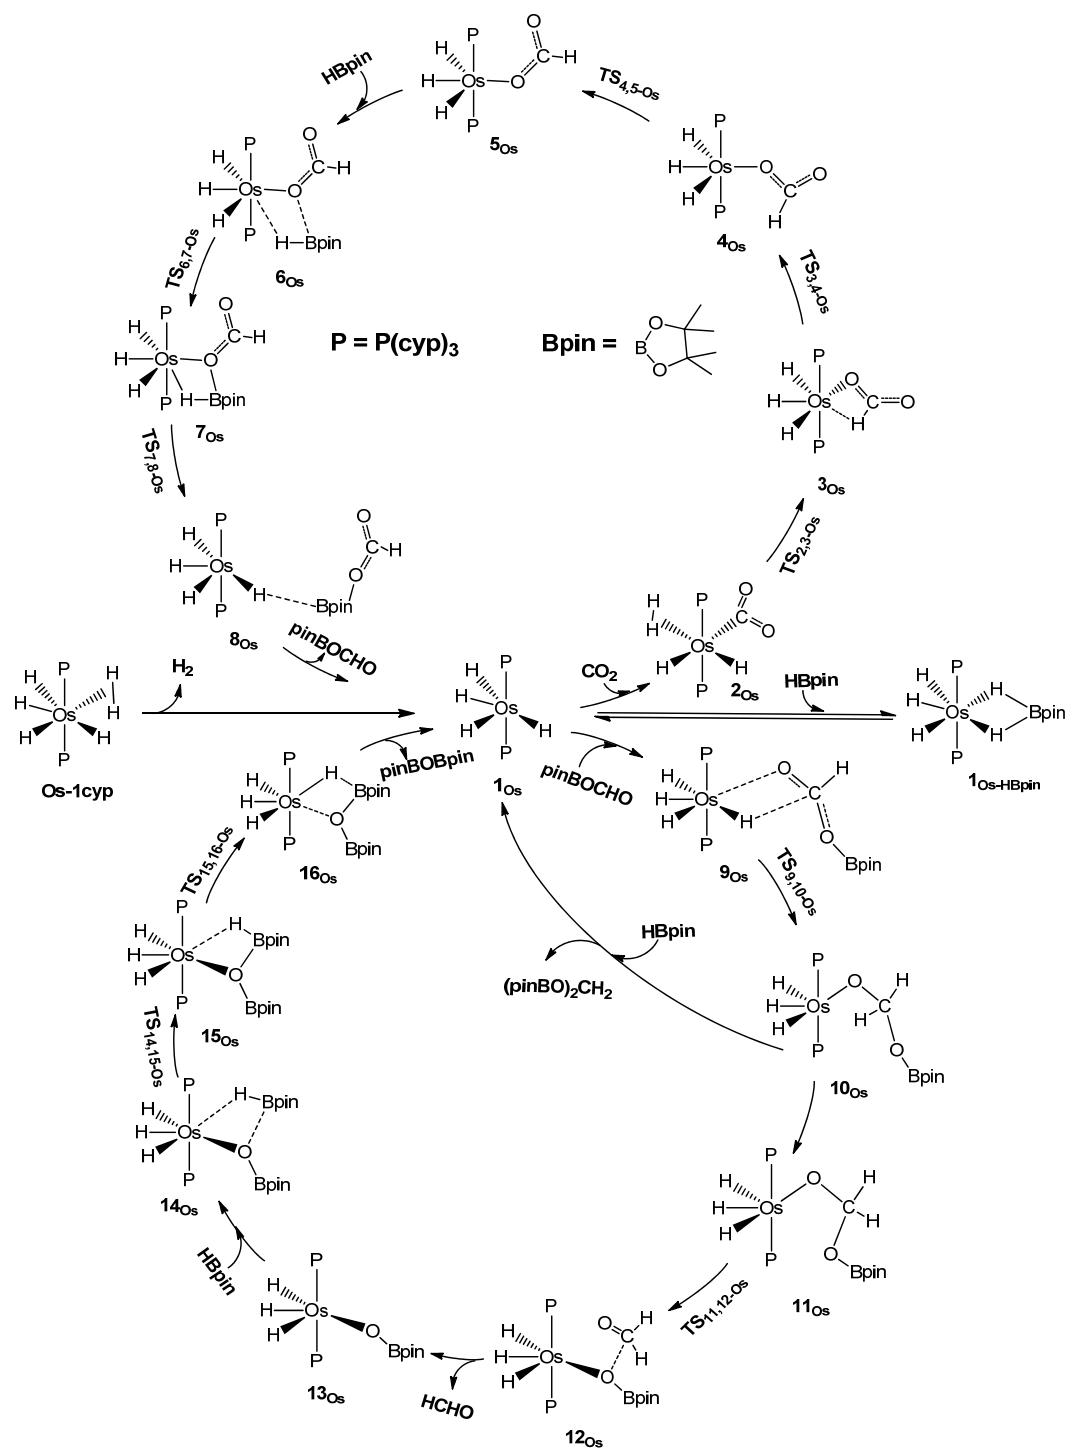

**Scheme S1.** Catalytic cycle for the reduction of carbon dioxide to formaldehyde catalyzed by **1<sub>os</sub>**.
